# Supplementary material for: A metal-, oxidant-, and fluorous solvent-free synthesis of α-indolylketones enabled by an umpolung strategy
Source: Royal Society of Chemistry journal article supplement (doi:10.1039/d0cc04795c), 2020-01-01
Supplement: d0cc04795c1.pdf [file d0cc04795c1.pdf]

# **A metal-, oxidant-, and fluorous solvent-free synthesis of $\alpha$ -indolylketones enabled by umpolung strategy**

Takumi Abe\*, Seiya Hirao, and Toshiki Yamashiro  
Faculty of Pharmaceutical Sciences, Health Sciences University of Hokkaido,  
Ishikari-tobetsu, Hokkaido 0610293, Japan  
E-mail: [abe-t@hoku-iryo-u.ac.jp](mailto:abe-t@hoku-iryo-u.ac.jp)

## **SUPPORTING INFORMATION**

### **Contents**

|                                                                                        |              |
|----------------------------------------------------------------------------------------|--------------|
| <b>1. General Experimental</b>                                                         | <b>S2</b>    |
| <b>2. Experimental Procedure</b>                                                       | <b>S2–18</b> |
| <b>3. Supplementary References</b>                                                     | <b>S18</b>   |
| <b>4. Copies of <math>^1\text{H}</math> and <math>^{13}\text{C}</math> NMR spectra</b> | <b>S19–</b>  |

74

## Experimental Section

### 1. General Experimental

#### *Mass-spectrometry*

High-resolution mass spectra were recorded with a JEOL JMS-T100LP mass spectrometers.

#### *NMR spectroscopy*

NMR experiments were performed with a JEOL JNM-ECA500 spectrometer operating at 500 MHz and 125 MHz for  $^1\text{H}$  and  $^{13}\text{C}$  acquisitions, respectively. Chemical shifts are expressed in ppm ( $\delta$ ) using residual solvent as the internal reference. For  $^1\text{H}$  NMR:  $\text{CDCl}_3$ ,  $\delta$  7.25;  $\text{DMSO}-d_6$ ,  $\delta$  2.50; acetone- $d_6$ ,  $\delta$  2.02; For  $^{13}\text{C}$  NMR:  $\text{CDCl}_3$ ,  $\delta$  77.1;  $\text{DMSO}-d_6$ ,  $\delta$  39.5; acetone- $d_6$ ,  $\delta$  29.1. NMR peak are reported as follows: s = singlet, d = doublet, t = triplet, q = quartet, m = multiplet, dd = doublet of doublets, ddd = doublet of doublet of doublets, td = triplet of doublets, br s = broad singlet; coupling constants in Hz; integration.

#### *Chromatography*

Reactions were monitored by thin layer chromatography (TLC) carried out on a silica gel plates (60F-254) and visualized under UV illumination at 254 or 366 nm depending on the compounds. Column chromatography was performed on silica gel (Silica Gel 63–210 mesh, Kanto Chemical Co., Ltd.).

#### *Starting materials*

The ROBIN (2-RO-3-bromoindoline, **1a**), and 3-methoxyindole (3-MeOIN, **5**) were prepared by reported methods.<sup>S1</sup> 3-bromo-2-hydroxyindoline **1b**, 3-bromoindole **2**, and HITABs (2-hydroxyindoline-3-triethylammonium bromides, **3**) were prepared by reported methods.<sup>S2</sup> DiMeOIN (2,3-dimethoxyindoline, **4**) was prepared by reported methods.<sup>S3</sup> Enamines **6** were prepared by reported methods.<sup>S4</sup>

All substrates were used as received from commercial suppliers (Sigma-Aldrich, TCI, and Wako) and all reagents were weighed and handled in air at room temperature.

## 2. Experimental Procedure

### Synthesis of 2-hydroxyindoline-3-triethylammonium bromides (3)

#### *trans*-2-Hydroxy-5-bromo-1-tosylindoline-3-ammonium bromide (3d)

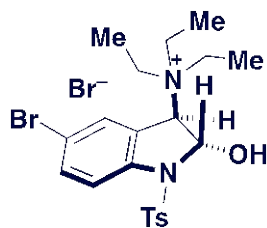

To a solution of 5-bromo-1-tosylindole (701 mg, 2 mmol) and H<sub>2</sub>O (0.36 mL, 20 mmol) in acetone (20 mL) was added NBS (392 mg, 2.2 mmol). The mixture was stirred at room temperature until the complete disappearance of starting material as indicated by TLC. Et<sub>3</sub>N (0.31 mL, 2.2 mmol) was added to the mixture and stirred further 1 h. The resulting precipitate was separated by filtration, washed with acetone, and dried *in vacuo* to give **3d** (746.1 mg, 68% yield).

746.1 mg, 68% yield. colorless solid; <sup>1</sup>H NMR (500 MHz, DMSO-*d*<sub>6</sub>)  $\delta$ : 8.01 (d, *J* = 8.6 Hz, 2H), 7.93 (d, *J* = 8.0 Hz, 1H), 7.70 (s, 1H), 7.66 (dd, *J* = 8.6, 1.8 Hz, 1H), 7.41 (d, *J* = 8.0 Hz, 2H), 7.32 (d, *J* = 9.2 Hz, 1H), 6.35 (d, *J* = 7.4 Hz, 1H), 4.83 (s, 1H), 3.33–3.46 (m, 6H), 2.34 (s, 3H), 1.02 (t, *J* = 7.4 Hz, 9H); <sup>13</sup>C NMR (125 MHz, DMSO-*d*<sub>6</sub>)  $\delta$ : 145.6, 142.2, 135.9, 135.7, 133.0, 128.2, 122.9, 115.7, 115.6, 85.1, 74.9, 53.4, 21.6, 8.9; HRMS (ESI) *m/z*: 467.1004, 469.0984 (Calcd for C<sub>21</sub>H<sub>28</sub>BrN<sub>2</sub>O<sub>3</sub>S [M]<sup>+</sup>: 467.1004, 469.0984).

#### *trans*-2-Hydroxy-4-chloro-1-tosylindoline-3-ammonium bromide (3e)

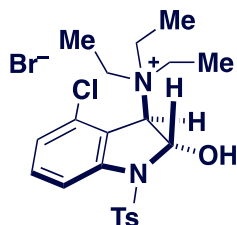

To a solution of 4-chloro-1-tosylindole (612 mg, 2 mmol) and H<sub>2</sub>O (0.36 mL, 20 mmol) in acetone (20 mL) was added NBS (392 mg, 2.2 mmol). The mixture was stirred at room temperature for 24 h. Then, Et<sub>3</sub>N (0.31 mL, 2.2 mmol) was added to the mixture and stirred further 1 h. The mixture was concentrated *in vacuo* and dried *in vacuo* to give **3e** (942 mg, 94% yield) without further purification.

942.0 mg, 94% yield. colorless oil; <sup>1</sup>H NMR (500 MHz, acetone-*d*<sub>6</sub>)  $\delta$ : 7.86 (d, *J* = 8.6 Hz, 2H), 7.42 (d, *J* = 8.0 Hz, 1H), 7.37 (t, *J* = 8.1 Hz, 1H), 7.36 (d, *J* = 8.1 Hz, 2H), 7.10 (d, *J* = 8.1 Hz, 1H), 6.05 (s, 1H), 5.13 (s, 1H), 2.58–2.60 (m, 6H), 2.35 (s, 3H), 1.03 (t, *J* = 6.9 Hz, 9H); <sup>13</sup>C NMR (125 MHz, acetone-*d*<sub>6</sub>)  $\delta$ : 144.9, 142.1, 136.1, 132.4, 131.8, 129.8, 128.1, 127.7, 124.3, 113.2, 93.5, 48.5, 46.1, 20.6, 10.7; HRMS (ESI) *m/z*: 423.1508, 425.1480 (Calcd for C<sub>21</sub>H<sub>28</sub>ClN<sub>2</sub>O<sub>3</sub>S [M]<sup>+</sup>: 423.1509, 425.1480).

***trans*-2-Hydroxy-6-chloro-1-tosylindoline-3-ammonium bromide (3f)**

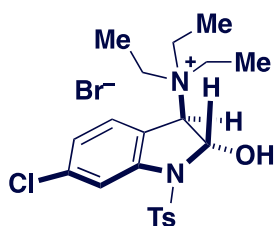

To a solution of 6-chloro-1-tosylindole (1.53 g, 5 mmol) and H<sub>2</sub>O (0.90 mL, 50 mmol) in acetone (50 mL) was added NBS (979 mg, 5.5 mmol). The mixture was stirred at room temperature until the complete disappearance of starting material as indicated by TLC. Et<sub>3</sub>N (0.77 mL, 5.5 mmol) was added to the mixture and stirred further 1 h. The resulting precipitate was separated by filtration, washed with acetone, and dried *in vacuo* to give **3f** (1.58 g, 63% yield).

1.58 g, 63% yield. colorless solid; <sup>1</sup>H NMR (500 MHz, DMSO-*d*<sub>6</sub>) δ: 8.04 (d, *J* = 8.6 Hz, 2H), 7.98 (d, *J* = 6.9 Hz, 1H), 7.56 (d, *J* = 8.6 Hz, 1H), 7.43 (d, *J* = 8.6 Hz, 2H), 7.29 (d, *J* = 2.3 Hz, 1H), 7.22 (dd, *J* = 2.3, 8.6 Hz, 1H), 6.39 (d, *J* = 6.3 Hz, 1H), 4.84 (s, 1H), 3.31–3.46 (m, 6H), 2.35 (s, 3H), 1.03 (t, *J* = 6.9 Hz, 9H); <sup>13</sup>C NMR (125 MHz, DMSO-*d*<sub>6</sub>) δ: 145.8, 144.1, 137.5, 135.8, 132.1, 130.7, 128.2, 124.0, 119.6, 113.3, 85.5, 74.8, 53.3, 21.6, 8.9; HRMS (ESI) *m/z*: 423.1511, 425.1480 (Calcd for C<sub>21</sub>H<sub>28</sub>ClN<sub>2</sub>O<sub>3</sub>S [M]<sup>+</sup>: 423.1509, 425.1480).

***trans*-2-Hydroxy-1-benzenesulfonylindoline-3-ammonium bromide (3g)**

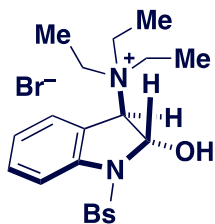

To a solution of 1-benzenesulfonylindole (5.15 g, 20 mmol) and H<sub>2</sub>O (3.60 mL, 200 mmol) in acetone (200 mL) was added NBS (3.74 g, 21 mmol). The mixture was stirred at room temperature for 6 h. Et<sub>3</sub>N (2.94 mL, 21 mmol) was added to the mixture and stirred further 1 h. The resulting precipitate was separated by filtration, washed with acetone, and dried *in vacuo* to give **3g** (7.47 g, 82% yield).

7.47 g, 82% yield. colorless solid; <sup>1</sup>H NMR (500 MHz, DMSO-*d*<sub>6</sub>) δ: 8.15 (d, *J* = 7.5 Hz, 2H), 7.90 (d, *J* = 6.9 Hz, 1H), 7.70 (t, *J* = 7.5 Hz, 1H), 7.61 (t, *J* = 7.4 Hz, 1H), 7.57 (d, *J* = 7.5 Hz, 1H), 7.49 (t, *J* = 8.0 Hz, 1H), 7.39 (d, *J* = 8.6 Hz, 1H), 7.15 (t, *J* = 8.1 Hz, 1H), 6.38 (d, *J* = 6.9 Hz, 1H), 4.85 (s, 1H), 3.33–3.47 (m, 6H), 1.01 (t, *J* = 6.9 Hz, 9H); <sup>13</sup>C NMR (125 MHz, DMSO-*d*<sub>6</sub>) δ: 142.7, 139.0, 134.7, 133.0, 130.5, 130.1, 128.1, 124.1, 120.5, 113.8, 84.8, 75.4, 53.3, 8.8; HRMS (ESI) *m/z*: 375.1742 (Calcd for C<sub>20</sub>H<sub>27</sub>N<sub>2</sub>O<sub>3</sub>S [M]<sup>+</sup>: 375.1742).



## Optimization of Reaction Conditions

Table S1. Screening of bases

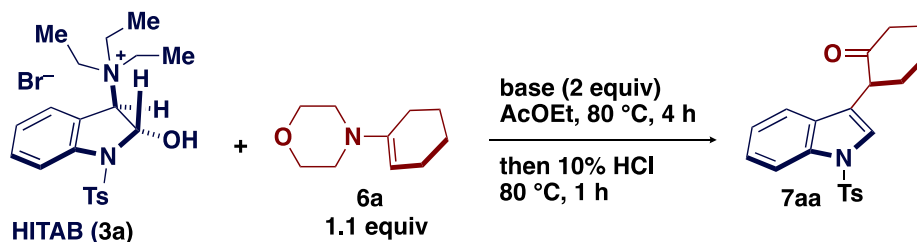

| entry | base                            | % yield |
|-------|---------------------------------|---------|
| 1     | Et <sub>3</sub> N               | 86      |
| 2     | TMEDA                           | 43      |
| 3     | <i>i</i> Pr <sub>2</sub> NEt    | 65      |
| 4     | pyridine                        | 67      |
| 5     | DMAP                            | 13      |
| 6     | DABCO                           | 46      |
| 7     | DBU                             | 8       |
| 8     | K <sub>2</sub> CO <sub>3</sub>  | 0       |
| 9     | Cs <sub>2</sub> CO <sub>3</sub> | 0       |
| 10    | NaOH                            | 0       |
| 11    | KOH                             | 0       |

A mixture of **3a** (469.4 mg, 1.0 mmol), **6a** (183.5 mg, 1.1 mmol) and base (2.0 mmol) in AcOEt (10 mL) was heated at 80 °C with stirring for 4 h. After cooling to room temperature, 10% aq. HCl (10 mL) was added to the mixture. Then the mixture was heated at 80 °C for 1 h. After cooling to room temperature, the whole was extracted with AcOEt (3 x 20 mL), washed with brine (20 mL). The organic layer was dried over MgSO<sub>4</sub> and concentrated *in vacuo*. The residue was purified by silica gel column chromatography (AcOEt:hexane = 1:5–1:2 or CHCl<sub>3</sub>:hexane = 1:1) to give **7aa**.

Table S2. Screening of solvents

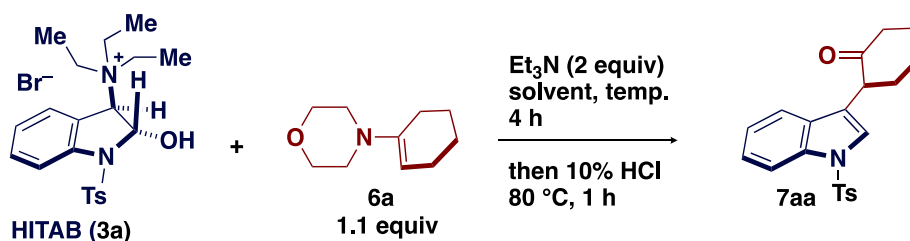

| entry | solvent         | temp. | % yield |
|-------|-----------------|-------|---------|
| 1     | AcOEt           | 80    | 86      |
| 2     | AcOEt           | 50    | 47      |
| 3     | AcOEt           | rt    | 4       |
| 4     | benzene         | 80    | 80      |
| 5     | toluene         | 80    | 83      |
| 6     | hexane          | 80    | 64      |
| 7     | 1,4-dioxane     | 80    | 0       |
| 8     | THF             | 80    | 0       |
| 9     | MeCN            | 80    | 52      |
| 10    | DMSO            | 80    | 0       |
| 11    | DMF             | 80    | 13      |
| 12    | $\text{CHCl}_3$ | 80    | 24      |

A mixture of **3a** (469.4 mg, 1.0 mmol), **6a** (183.5 mg, 1.1 mmol) and  $\text{Et}_3\text{N}$  (0.28 mL, 2.0 mmol) in solvent (10 mL) was heated at indicated temperature with stirring for 4 h. After cooling to room temperature, 10% aq. HCl (10 mL) was added to the mixture. Then the mixture was heated at 80 °C for 1 h. After cooling to room temperature, the whole was extracted with AcOEt (3 x 20 mL), washed with brine (20 mL). The organic layer was dried over  $\text{MgSO}_4$  and concentrated *in vacuo*. The residue was purified by silica gel column chromatography (AcOEt:hexane = 1:5–1:2 or  $\text{CHCl}_3$ :hexane = 1:1) to give **7aa**.

## General Procedure for Synthesis of $\alpha$ -Indolylketones (Scheme 3)

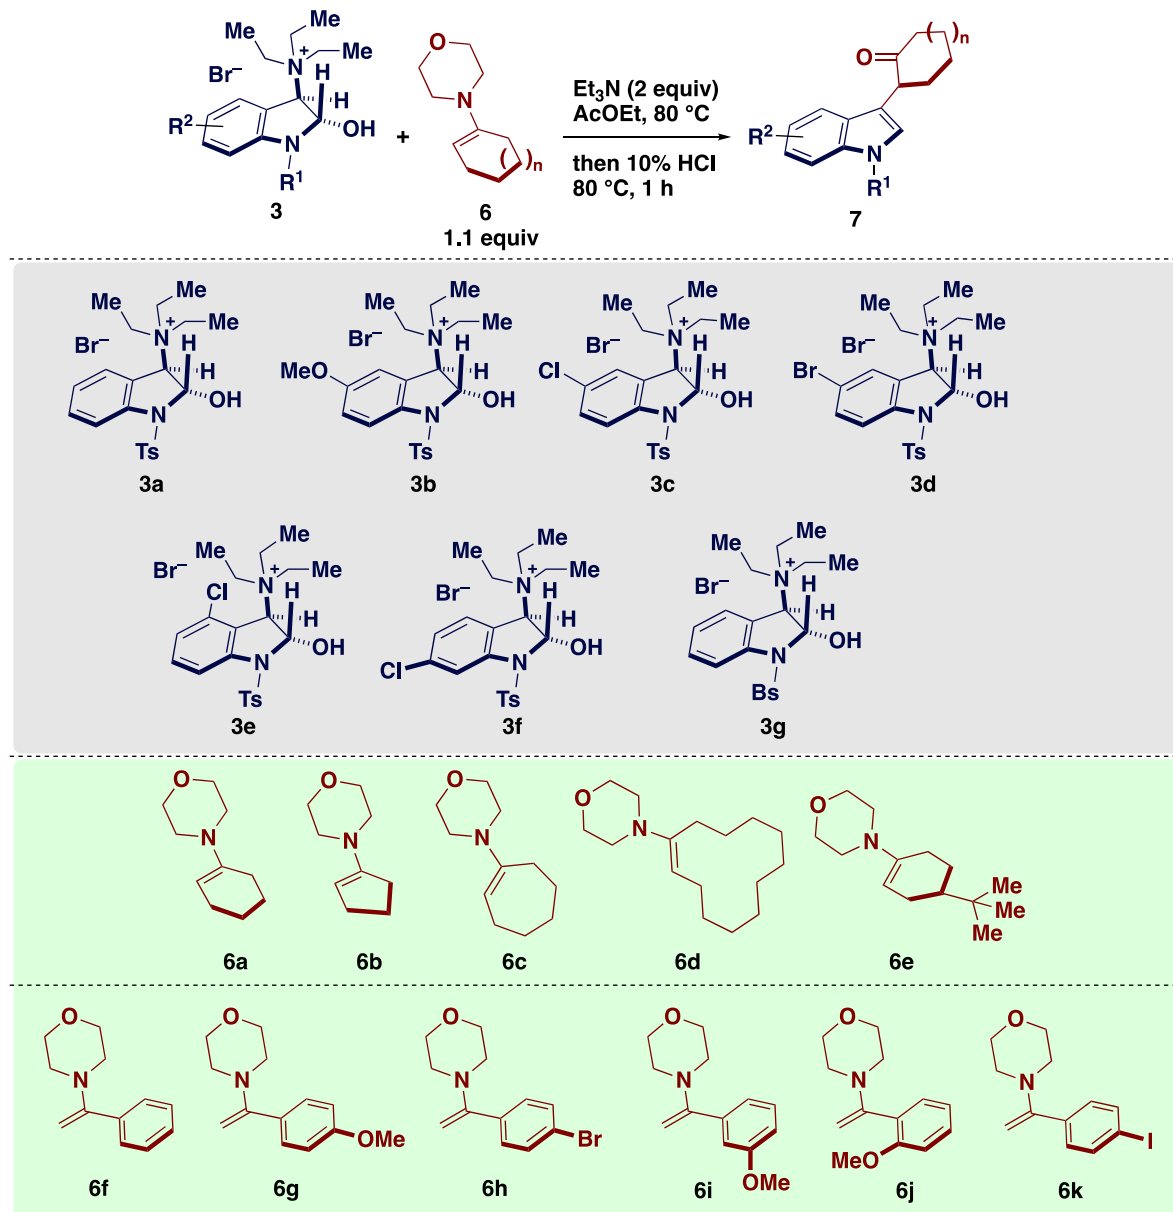

A mixture of **3** (1.0 mmol), **6** (1.1 mmol) and Et<sub>3</sub>N (0.28 mL, 2.0 mmol) in AcOEt (10 mL) was heated at 80 °C with stirring for 2–16 h. After cooling to room temperature, 10% aq. HCl (10 mL) was added to the mixture. Then the mixture was heated at 80 °C for 1 h. After cooling to room temperature, the whole was extracted with AcOEt (3 x 20 mL), washed with brine (20 mL). The organic layer was dried over MgSO<sub>4</sub> and concentrated *in vacuo*. The residue was purified by silica gel column chromatography (AcOEt:hexane = 1:5–1:2 or CHCl<sub>3</sub>:hexane = 1:1) to give **7**.

**2-(1-Tosyl-1*H*-indol-3-yl)cyclohexan-1-one (7aa)**

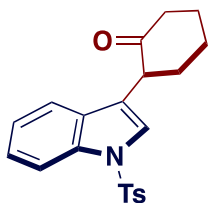

315.3 mg, 86% yield. colorless solid;  $^1\text{H}$  NMR (500 MHz,  $\text{CDCl}_3$ )  $\delta$ : 7.95 (d,  $J = 8.1$  Hz, 1H), 7.75 (d,  $J = 8.6$  Hz, 2H), 7.51 (s, 1H), 7.31 (d,  $J = 8.0$  Hz, 1H), 7.28 (t,  $J = 8.6$  Hz, 1H), 7.20 (d,  $J = 8.1$  Hz, 2H), 7.19 (t,  $J = 8.0$  Hz, 1H), 3.79 (dd,  $J = 11.5, 5.2$  Hz, 1H), 2.45–2.55 (m, 2H), 2.33–2.39 (m, 1H), 2.32 (s, 3H), 2.12–2.19 (m, 1H), 2.00–2.08 (m, 2H), 1.80–1.90 (m, 2H);  $^{13}\text{C}$  NMR (125 MHz,  $\text{CDCl}_3$ )  $\delta$ : 209.1, 144.9, 135.4, 135.1, 130.5, 130.0, 126.9, 124.7, 123.8, 123.1, 120.5, 120.0, 113.8, 48.5, 42.1, 34.3, 28.1, 25.3, 21.6; HRMS (ESI)  $m/z$ : 390.1139 (Calcd for  $\text{C}_{21}\text{H}_{21}\text{NNaO}_3\text{S}$   $[\text{M}+\text{Na}]^+$ : 390.1140).

**2-(5-Methoxy-1-tosyl-1*H*-indol-3-yl)cyclohexan-1-one (7ba)**

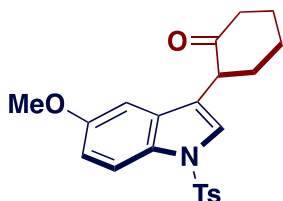

306.9 mg, 77% yield. colorless oil;  $^1\text{H}$  NMR (500 MHz,  $\text{CDCl}_3$ )  $\delta$ : 7.83 (d,  $J = 9.2$  Hz, 1H), 7.71 (d,  $J = 8.6$  Hz, 2H), 7.46 (s, 1H), 7.19 (d,  $J = 8.0$  Hz, 2H), 6.88 (dd,  $J = 9.2, 2.3$  Hz, 1H), 6.72 (d,  $J = 2.9$  Hz, 1H), 3.78 (s, 3H), 3.73 (dd,  $J = 11.4, 5.7$  Hz, 1H), 2.44–2.54 (m, 2H), 2.32–2.37 (m, 1H), 2.32 (s, 3H), 2.11–2.19 (m, 1H), 2.00–2.08 (m, 2H), 1.81–1.90 (m, 2H);  $^{13}\text{C}$  NMR (125 MHz,  $\text{CDCl}_3$ )  $\delta$ : 209.0, 156.3, 144.8, 135.3, 131.6, 129.9, 126.8, 124.6, 120.6, 114.6, 113.4, 102.8, 55.8, 48.4, 42.0, 34.1, 28.0, 25.2, 21.6; HRMS (ESI)  $m/z$ : 420.1246 (Calcd for  $\text{C}_{22}\text{H}_{23}\text{NNaO}_4\text{S}$   $[\text{M}+\text{Na}]^+$ : 420.1246).

**2-(5-Chloro-1-tosyl-1*H*-indol-3-yl)cyclohexan-1-one (7ca)**

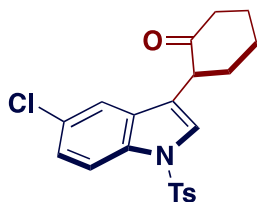

340.4 mg, 85% yield. colorless solid;  $^1\text{H}$  NMR (500 MHz,  $\text{CDCl}_3$ )  $\delta$ : 7.86 (d,  $J = 8.6$  Hz, 1H), 7.72 (d,  $J = 8.6$  Hz, 2H), 7.51 (s, 1H), 7.26 (d,  $J = 1.7$  Hz, 1H), 7.21–7.23 (m, 1H), 7.21 (d,  $J = 8.0$  Hz, 2H), 3.73 (dd,  $J = 12.1, 5.2$  Hz, 1H), 2.45–2.54 (m, 2H), 2.29–2.41 (m, 1H), 2.33 (s, 3H), 2.16–2.20 (m, 1H), 1.95–2.03 (m, 2H), 1.79–1.88 (m, 2H);  $^{13}\text{C}$  NMR (125 MHz,  $\text{CDCl}_3$ )  $\delta$ : 208.7, 145.2, 135.1, 133.5, 131.8, 130.1, 129.0, 126.9, 125.1, 124.9, 120.0, 119.8, 114.8, 48.3, 42.2, 34.3, 28.0, 25.4, 21.7; HRMS (ESI)  $m/z$ : 424.0750, 426.0721 (Calcd for  $\text{C}_{21}\text{H}_{20}\text{ClNNaO}_3\text{S}$   $[\text{M}+\text{Na}]^+$ : 424.0750, 426.0721).

**2-(5-Bromo-1-tosyl-1H-indol-3-yl)cyclohexan-1-one (7da)**

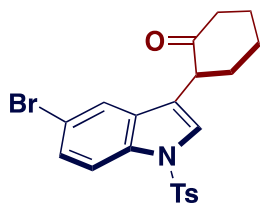

325.0 mg, 73% yield. colorless solid;  $^1\text{H}$  NMR (500 MHz,  $\text{CDCl}_3$ )  $\delta$ : 7.82 (d,  $J$  = 8.6 Hz, 1H), 7.72 (d,  $J$  = 8.1 Hz, 2H), 7.50 (s, 1H), 7.42 (s, 1H), 7.36 (d,  $J$  = 9.2 Hz, 1H), 7.21 (d,  $J$  = 8.0 Hz, 2H), 3.73 (dd,  $J$  = 11.5, 4.6 Hz, 1H), 2.46–2.55 (m, 2H), 2.33–2.36 (m, 1H), 2.33 (s, 3H), 2.17 (m, 1H), 1.95–2.04 (m, 2H), 1.84–1.88 (m, 2H);  $^{13}\text{C}$  NMR (125 MHz,  $\text{CDCl}_3$ )  $\delta$ : 208.6, 145.3, 135.1, 133.9, 132.3, 130.1, 127.6, 126.9, 125.0, 122.8, 119.9, 116.7, 115.2, 48.3, 42.2, 34.4, 28.0, 25.4, 21.7; HRMS (ESI)  $m/z$ : 468.0245, 470.0224 (Calcd for  $\text{C}_{21}\text{H}_{20}\text{BrNNaO}_3\text{S}$   $[\text{M}+\text{Na}]^+$ : 468.0245, 470.0224).

**2-(4-Chloro-1-tosyl-1H-indol-3-yl)cyclohexan-1-one (7ea)**

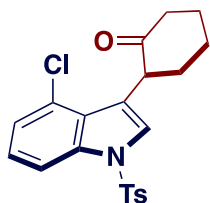

225.1 mg, 56% yield. colorless solid;  $^1\text{H}$  NMR (500 MHz,  $\text{CDCl}_3$ )  $\delta$ : 7.87 (d,  $J$  = 7.5 Hz, 1H), 7.73 (d,  $J$  = 8.6 Hz, 2H), 7.50 (s, 1H), 7.23 (d,  $J$  = 8.1 Hz, 2H), 7.15 (d,  $J$  = 7.5 Hz, 1H), 7.14 (d,  $J$  = 1.2 Hz, 1H), 4.41 (d,  $J$  = 11.5 Hz, 1H), 2.51–2.57 (m, 2H), 2.45–2.48 (m, 1H), 2.34 (s, 3H), 2.19–2.23 (m, 1H), 2.03–2.06 (m, 1H), 1.79–1.97 (m, 3H);  $^{13}\text{C}$  NMR (125 MHz,  $\text{CDCl}_3$ )  $\delta$ : 209.7, 145.3, 136.4, 135.0, 130.1, 127.5, 126.9, 126.5, 125.1, 124.8, 124.6, 120.5, 112.5, 49.2, 42.4, 34.5, 25.9, 21.7; HRMS (ESI)  $m/z$ : 424.0751, 426.0721 (Calcd for  $\text{C}_{21}\text{H}_{20}\text{ClNNaO}_3\text{S}$   $[\text{M}+\text{Na}]^+$ : 424.0750, 426.0721).

**2-(6-Chloro-1-tosyl-1H-indol-3-yl)cyclohexan-1-one (7fa)**

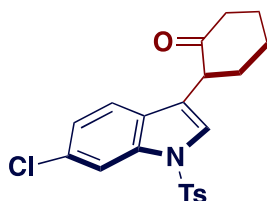

274.1 mg, 68% yield. colorless solid;  $^1\text{H}$  NMR (500 MHz,  $\text{CDCl}_3$ )  $\delta$ : 7.96 (d,  $J$  = 1.7 Hz, 1H), 7.75 (d,  $J$  = 8.6 Hz, 2H), 7.47 (d,  $J$  = 1.1 Hz, 1H), 7.24 (d,  $J$  = 8.6 Hz, 2H), 7.21 (d,  $J$  = 6.9 Hz, 1H), 7.15 (dd,  $J$  = 8.6, 2.3 Hz, 1H), 3.75 (dd,  $J$  = 12.1, 5.8 Hz, 1H), 2.44–2.55 (m, 2H), 2.33–2.38 (m, 1H), 2.35 (s, 3H), 2.14–2.19 (m, 1H), 1.98–2.05 (m,

2H), 1.78–1.89 (m, 2H);  $^{13}\text{C}$  NMR (125 MHz,  $\text{CDCl}_3$ )  $\delta$ : 208.8, 145.3, 135.5, 135.1, 130.7, 130.1, 129.0, 126.9, 124.2, 123.8, 121.0, 120.4, 113.9, 48.3, 42.1, 34.2, 28.0, 25.3, 21.7; HRMS (ESI)  $m/z$ : 424.0750, 426.0721 (Calcd for  $\text{C}_{21}\text{H}_{20}\text{ClNNaO}_3\text{S}$   $[\text{M}+\text{Na}]^+$ : 424.0750, 426.0721).

**2-(1-(Phenylsulfonyl)-1*H*-indol-3-yl)cyclohexan-1-one (7ga)**

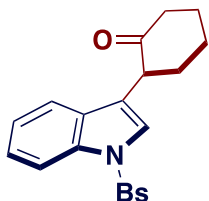

325.9 mg, 92% yield. colorless oil;  $^1\text{H}$  NMR (500 MHz,  $\text{CDCl}_3$ )  $\delta$ : 7.96 (d,  $J$  = 8.0 Hz, 1H), 7.87 (d,  $J$  = 7.4 Hz, 2H), 7.51–7.53 (m, 2H), 7.43 (t,  $J$  = 8.0 Hz, 2H), 7.32 (d,  $J$  = 8.0 Hz, 1H), 7.29 (t,  $J$  = 7.4 Hz, 1H), 7.20 (t,  $J$  = 7.5 Hz, 1H), 3.80 (dd,  $J$  = 11.5, 5.2 Hz, 1H), 2.46–2.56 (m, 2H), 2.33–2.41 (m, 1H), 2.14–2.20 (m, 1H), 2.00–2.08 (m, 2H), 1.81–1.90 (m, 2H);  $^{13}\text{C}$  NMR (125 MHz,  $\text{CDCl}_3$ )  $\delta$ : 209.0, 138.3, 135.2, 133.9, 130.5, 129.4, 126.8, 124.8, 123.7, 123.2, 120.8, 120.1, 113.8, 48.4, 42.1, 34.3, 28.1, 25.3; HRMS (ESI)  $m/z$ : 376.0983 (Calcd for  $\text{C}_{20}\text{H}_{19}\text{NNaO}_3\text{S}$   $[\text{M}+\text{Na}]^+$ : 376.0983).

**2-(1-(Tosyl)-1*H*-indol-3-yl)cyclopentan-1-one (7ab)**

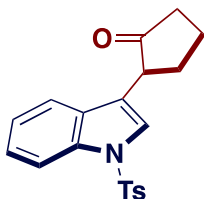

229.0 mg, 65% yield. colorless oil;  $^1\text{H}$  NMR (500 MHz,  $\text{CDCl}_3$ )  $\delta$ : 7.96 (d,  $J$  = 8.6 Hz, 1H), 7.75 (d,  $J$  = 8.6 Hz, 2H), 7.47 (d,  $J$  = 7.5 Hz, 1H), 7.43 (s, 1H), 7.30 (t,  $J$  = 7.5 Hz, 1H), 7.22 (t,  $J$  = 6.9 Hz, 1H), 7.19 (d,  $J$  = 8.0 Hz, 2H), 3.51 (t,  $J$  = 9.2 Hz, 1H), 2.45–2.55 (m, 2H), 2.27–2.38 (m, 1H), 2.31 (s, 3H), 2.13–2.19 (m, 1H), 2.05–2.10 (m, 1H), 1.97–2.02 (m, 1H);  $^{13}\text{C}$  NMR (125 MHz,  $\text{CDCl}_3$ )  $\delta$ : 216.9, 145.0, 135.3, 135.3, 130.3, 130.0, 126.9, 124.9, 123.2, 123.2, 120.4, 119.7, 113.7, 46.6, 38.1, 30.7, 21.6, 21.1; HRMS (ESI)  $m/z$ : 376.0984 (Calcd for  $\text{C}_{20}\text{H}_{19}\text{NNaO}_3\text{S}$   $[\text{M}+\text{Na}]^+$ : 376.0983).

**2-(1-(Tosyl)-1*H*-indol-3-yl)cycloheptan-1-one (7ac)**

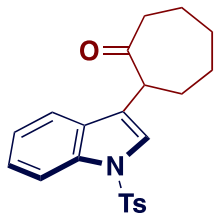

323.5 mg, 85% yield. colorless solid;  $^1\text{H}$  NMR (500 MHz,  $\text{CDCl}_3$ )  $\delta$ : 7.93 (d,  $J$  = 8.0 Hz, 1H), 7.74 (d,  $J$  = 8.0 Hz, 2H), 7.53 (d,  $J$  = 8.0 Hz, 1H), 7.52 (s, 1H), 7.28 (td,  $J$  = 8.0, 1.2 Hz, 1H), 7.20–7.23 (m, 1H), 7.21 (d,  $J$  = 8.6 Hz,

2H), 3.92 (dd,  $J = 11.5, 4.0$  Hz, 1H), 2.68 (td,  $J = 13.2, 3.5$  Hz, 1H), 2.42–2.47 (m, 1H), 2.33 (s, 3H), 2.19–2.24 (m, 1H), 1.89–2.06 (m, 4H), 1.61–1.69 (m, 1H), 1.43–1.52 (m, 2H);  $^{13}\text{C}$  NMR (125 MHz,  $\text{CDCl}_3$ )  $\delta$ : 211.9, 145.0, 135.3, 135.2, 130.2, 130.0, 126.9, 124.9, 123.5, 123.3, 121.6, 120.3, 113.7, 50.0, 41.6, 30.9, 29.9, 28.4, 25.4, 21.6; HRMS (ESI)  $m/z$ : 404.1296 (Calcd for  $\text{C}_{22}\text{H}_{23}\text{NNaO}_3\text{S}$   $[\text{M}+\text{Na}]^+$ : 404.1296).

#### 2-(1-Tosyl-1*H*-indol-3-yl)cyclododecan-1-one (7ad)

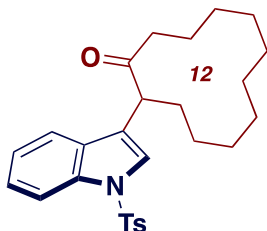

406.0 mg, 90% yield. colorless solid;  $^1\text{H}$  NMR (500 MHz,  $\text{CDCl}_3$ )  $\delta$ : 7.95 (d,  $J = 8.0$  Hz, 1H), 7.74 (d,  $J = 8.6$  Hz, 2H), 7.51 (s, 1H), 7.46 (d,  $J = 8.0$  Hz, 1H), 7.30 (td,  $J = 6.9, 1.2$  Hz, 1H), 7.21 (t,  $J = 7.5$  Hz, 1H), 7.20 (d,  $J = 8.0$  Hz, 2H), 3.96 (dd,  $J = 12.0, 2.9$  Hz, 1H), 2.52 (ddd,  $J = 17.2, 11.5, 2.9$  Hz, 1H), 2.25–2.38 (m, 1H), 2.33 (s, 3H), 1.99–2.04 (m, 1H), 1.84–1.93 (m, 1H), 1.71–1.77 (m, 1H), 1.25–1.50 (m, 15H);  $^{13}\text{C}$  NMR (125 MHz,  $\text{CDCl}_3$ )  $\delta$ : 211.3, 145.1, 135.3, 135.2, 130.1, 130.0, 126.9, 125.1, 123.6, 123.5, 121.3, 119.7, 113.9, 49.0, 36.7, 29.4, 25.7, 25.4, 24.2, 24.1, 23.9, 23.5, 22.4, 22.3, 21.7; HRMS (ESI)  $m/z$ : 474.2080 (Calcd for  $\text{C}_{27}\text{H}_{33}\text{NNaO}_3\text{S}$   $[\text{M}+\text{Na}]^+$ : 474.2079).

#### *Rel*-(2*S*,4*S*)-4-(*tert*-butyl)-2-(1-tosyl-1*H*-indol-3-yl)cyclohexan-1-one (7ae)

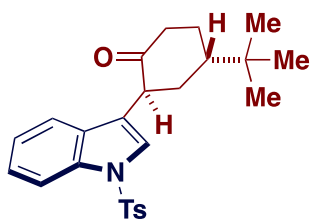

295.7 mg, 70% yield. colorless oil;  $^1\text{H}$  NMR (500 MHz,  $\text{CDCl}_3$ )  $\delta$ : 7.95 (d,  $J = 8.1$  Hz, 1H), 7.77 (d,  $J = 8.6$  Hz, 2H), 7.52 (s, 1H), 7.29 (d,  $J = 7.4$  Hz, 1H), 7.26 (d,  $J = 5.2$  Hz, 1H), 7.20 (d,  $J = 8.6$  Hz, 2H), 7.17–7.22 (m, 1H), 3.82 (dd,  $J = 12.1, 5.2$  Hz, 1H), 2.53–2.58 (m, 2H), 2.35–2.41 (m, 1H), 2.32 (s, 3H), 2.18–2.25 (m, 1H), 1.74–1.82 (m, 2H), 1.57–1.67 (m, 1H), 0.96 (s, 9H);  $^{13}\text{C}$  NMR (125 MHz,  $\text{CDCl}_3$ )  $\delta$ : 209.2, 144.9, 135.5, 135.1, 130.5, 130.0, 126.9, 124.6, 123.9, 123.1, 120.6, 119.9, 113.8, 47.8, 47.6, 41.7, 35.8, 32.7, 31.6, 28.8, 27.8, 27.6, 21.6; HRMS (ESI)  $m/z$ : 446.1766 (Calcd for  $\text{C}_{25}\text{H}_{29}\text{NNaO}_3\text{S}$   $[\text{M}+\text{Na}]^+$ : 446.1766).

#### 2-(5-Methoxy-1-tosyl-1*H*-indol-3-yl)cyclopentan-1-one (7bb)

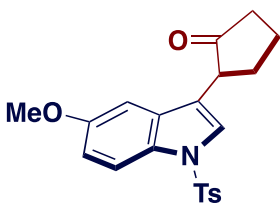

236.6 mg, 62% yield. colorless oil;  $^1\text{H}$  NMR (500 MHz,  $\text{CDCl}_3$ )  $\delta$ : 7.83 (d,  $J = 9.8$  Hz, 1H), 7.71 (d,  $J = 8.0$  Hz, 2H),

7.37 (s, 1H), 7.20 (d,  $J = 8.6$  Hz, 2H), 6.90–6.92 (m, 2H), 3.80 (s, 3H), 3.46 (dd,  $J = 9.2, 8.0$  Hz, 1H), 2.44–2.57 (m, 2H), 2.30–2.38 (m, 1H), 2.33 (s, 3H), 2.14–2.20 (m, 1H), 2.04–2.13 (m, 1H), 1.95–2.03 (m, 1H);  $^{13}\text{C}$  NMR (125 MHz,  $\text{CDCl}_3$ )  $\delta$ : 216.8, 156.4, 145.0, 135.2, 131.5, 130.0, 129.9, 126.8, 123.9, 119.9, 114.6, 113.7, 55.8, 46.6, 38.1, 30.5, 21.6, 21.1; HRMS (ESI)  $m/z$ : 406.1090 (Calcd for  $\text{C}_{21}\text{H}_{21}\text{NNaO}_4\text{S}$   $[\text{M}+\text{Na}]^+$ : 406.1089).

#### 2-(5-Methoxy-1-tosyl-1H-indol-3-yl)cyclododecan-1-one (7bd)

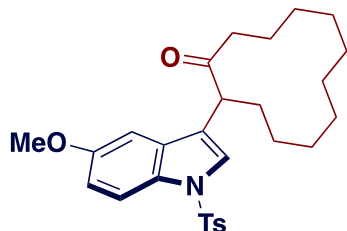

380.0 mg, 79% yield. colorless solid;  $^1\text{H}$  NMR (500 MHz,  $\text{CDCl}_3$ )  $\delta$ : 7.84 (d,  $J = 9.2$  Hz, 1H), 7.70 (d,  $J = 8.6$  Hz, 2H), 7.47 (s, 1H), 7.19 (d,  $J = 8.9$  Hz, 2H), 6.90 (dd,  $J = 9.2, 2.3$  Hz, 1H), 6.86 (d,  $J = 2.3$  Hz, 1H), 3.87 (dd,  $J = 12.0, 2.9$  Hz, 1H), 3.79 (s, 3H), 2.52 (ddd,  $J = 16.6, 11.5, 2.9$  Hz, 1H), 2.32 (s, 3H), 2.24–2.32 (m, 1H), 1.85–1.97 (m, 2H), 1.24–1.50 (m, 16H);  $^{13}\text{C}$  NMR (125 MHz,  $\text{CDCl}_3$ )  $\delta$ : 211.2, 156.7, 145.0, 135.1, 131.1, 130.0, 129.9, 126.8, 124.4, 121.4, 114.8, 114.1, 102.1, 55.7, 49.4, 36.2, 29.2, 25.8, 25.5, 24.1, 24.0, 23.8, 23.5, 22.4, 22.2, 21.6; HRMS (ESI)  $m/z$ : 504.2185 (Calcd for  $\text{C}_{28}\text{H}_{35}\text{NNaO}_4\text{S}$   $[\text{M}+\text{Na}]^+$ : 504.2185).

#### 1-phenyl-2-(1-tosyl-1H-indol-3-yl)ethan-1-one (7af)

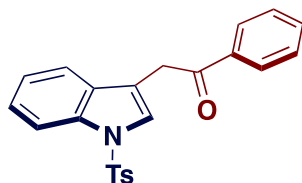

315.5 mg, 81% yield. colorless oil;  $^1\text{H}$  NMR (500 MHz,  $\text{CDCl}_3$ )  $\delta$ : 8.01 (d,  $J = 6.9$  Hz, 2H), 7.96 (d,  $J = 8.6$  Hz, 1H), 7.70 (d,  $J = 8.6$  Hz, 2H), 7.58 (t,  $J = 7.5$  Hz, 1H), 7.54 (s, 1H), 7.45–7.49 (m, 3H), 7.31 (t,  $J = 7.4$  Hz, 1H), 7.23 (t,  $J = 6.9$  Hz, 1H), 7.16 (d,  $J = 8.0$  Hz, 2H), 4.32 (s, 2H), 2.31 (s, 3H);  $^{13}\text{C}$  NMR (125 MHz,  $\text{CDCl}_3$ )  $\delta$ : 196.3, 144.9, 136.3, 135.3, 135.2, 133.5, 130.8, 129.9, 128.8, 128.6, 126.9, 125.1, 125.0, 123.4, 119.7, 115.9, 113.8, 35.3, 21.6; HRMS (ESI)  $m/z$ : 412.0984 (Calcd for  $\text{C}_{23}\text{H}_{19}\text{NNaO}_3\text{S}$   $[\text{M}+\text{Na}]^+$ : 412.0983).

#### 1-(4-Methoxyphenyl)-2-(1-tosyl-1H-indol-3-yl)ethan-1-one (7ag)

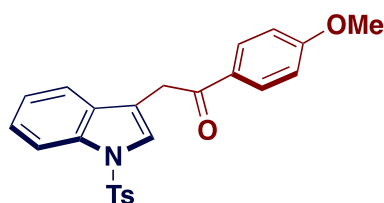

328.1 mg, 78% yield. colorless oil;  $^1\text{H}$  NMR (500 MHz,  $\text{CDCl}_3$ )  $\delta$ : 7.98 (d,  $J = 9.2$  Hz, 2H), 7.96 (d,  $J = 8.6$  Hz, 1H), 7.69 (d,  $J = 8.6$  Hz, 2H), 7.51 (s, 1H), 7.48 (d,  $J = 8.1$  Hz, 1H), 7.30 (t,  $J = 7.5$  Hz, 1H), 7.22 (t,  $J = 8.1$  Hz, 1H), 7.15 (d,  $J = 8.0$  Hz, 2H), 6.92 (d,  $J = 9.2$  Hz, 2H), 4.26 (s, 2H), 3.86 (s, 3H), 2.30 (s, 3H);  $^{13}\text{C}$  NMR (125 MHz,  $\text{CDCl}_3$ )  $\delta$ :



195.0, 163.8, 144.9, 135.3, 135.2, 130.9, 130.8, 129.9, 129.4, 126.9, 124.9, 123.4, 119.7, 116.4, 114.0, 113.8, 55.6, 35.0, 21.6; HRMS (ESI)  $m/z$ : 442.1088 (Calcd for  $C_{24}H_{21}NNaO_4S$   $[M+Na]^+$ : 442.1089).

**1-(4-Bromophenyl)-2-(1-tosyl-1*H*-indol-3-yl)ethan-1-one (7ah)**

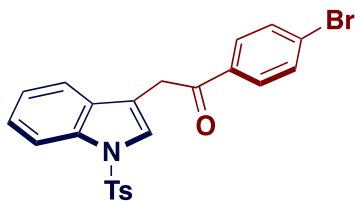

352.2 mg, 75% yield. colorless oil;  $^1H$  NMR (500 MHz,  $CDCl_3$ )  $\delta$ : 7.96 (d,  $J$  = 8.6 Hz, 1H), 7.84 (d,  $J$  = 8.6 Hz, 2H), 7.68 (d,  $J$  = 8.6 Hz, 2H), 7.57 (d,  $J$  = 8.6 Hz, 2H), 7.51 (s, 1H), 7.45 (d,  $J$  = 8.0 Hz, 1H), 7.31 (t,  $J$  = 8.1 Hz, 1H), 7.23 (t,  $J$  = 7.4 Hz, 1H), 7.16 (d,  $J$  = 8.6 Hz, 2H), 4.27 (s, 2H), 2.32 (s, 3H);  $^{13}C$  NMR (125 MHz,  $CDCl_3$ )  $\delta$ : 195.4, 145.0, 135.2, 135.1, 132.1, 130.6, 130.1, 129.9, 128.7, 126.8, 125.1, 125.0, 123.5, 119.6, 115.6, 113.9, 35.4, 21.7; HRMS (ESI)  $m/z$ : 490.0089, 492.0067 (Calcd for  $C_{23}H_{18}BrNNaO_3S$   $[M+Na]^+$ : 490.0088, 492.0068).

**1-(3-Methoxyphenyl)-2-(1-tosyl-1*H*-indol-3-yl)ethan-1-one (7ai)**

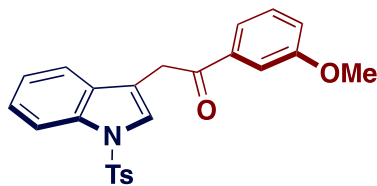

184.6 mg, 44% yield. colorless oil;  $^1H$  NMR (500 MHz,  $CDCl_3$ )  $\delta$ : 7.96 (d,  $J$  = 8.1 Hz, 1H), 7.69 (d,  $J$  = 8.0 Hz, 2H), 7.59 (dd,  $J$  = 8.6, 1.2 Hz, 1H), 7.53 (s, 1H), 7.51 (dd,  $J$  = 2.9, 1.7 Hz, 1H), 7.47 (d,  $J$  = 8.0 Hz, 1H), 7.37 (t,  $J$  = 8.6 Hz, 1H), 7.31 (td,  $J$  = 7.5, 1.2 Hz, 1H), 7.23 (t,  $J$  = 7.4 Hz, 1H), 7.16 (d,  $J$  = 8.1 Hz, 2H), 7.12 (dd,  $J$  = 8.0, 3.4 Hz, 1H), 4.30 (s, 2H), 3.82 (s, 3H), 2.32 (s, 3H);  $^{13}C$  NMR (125 MHz,  $CDCl_3$ )  $\delta$ : 196.2, 160.0, 144.9, 137.7, 135.3, 135.2, 130.8, 129.9, 129.8, 126.9, 125.1, 125.0, 123.4, 121.2, 120.0, 119.6, 115.9, 113.8, 112.7, 55.5, 35.4, 21.6; HRMS (ESI)  $m/z$ : 442.1089 (Calcd for  $C_{24}H_{21}NNaO_4S$   $[M+Na]^+$ : 442.1089).

**1-(2-Methoxyphenyl)-2-(1-tosyl-1*H*-indol-3-yl)ethan-1-one (7aj)**

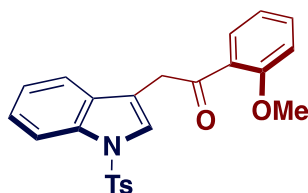

288.2 mg, 69% yield. colorless oil;  $^1H$  NMR (500 MHz,  $CDCl_3$ )  $\delta$ : 7.94 (d,  $J$  = 8.0 Hz, 1H), 7.68 (d,  $J$  = 8.6 Hz, 2H), 7.67 (d,  $J$  = 8.0 Hz, 1H), 7.49 (s, 1H), 7.45 (d,  $J$  = 8.6 Hz, 2H), 7.28 (t,  $J$  = 7.5 Hz, 1H), 7.21 (t,  $J$  = 6.9 Hz, 1H), 7.15 (d,  $J$  = 8.6 Hz, 2H), 6.98 (t,  $J$  = 7.5 Hz, 1H), 6.95 (d,  $J$  = 8.6 Hz, 1H), 4.34 (s, 2H), 3.86 (s, 3H), 2.30 (s, 3H);  $^{13}C$  NMR (125 MHz,  $CDCl_3$ )  $\delta$ : 198.7, 158.5, 144.8, 135.4, 135.1, 133.9, 131.2, 130.8, 129.9, 127.7, 126.8, 124.8, 124.7, 123.3, 120.9, 119.8, 116.6, 113.7, 111.6, 55.6, 40.0, 21.6; HRMS (ESI)  $m/z$ : 442.1089 (Calcd for  $C_{24}H_{21}NNaO_4S$

[M+Na]<sup>+</sup>: 442.1089).

#### 1-(4-Iodophenyl)-2-(1-tosyl-1*H*-indol-3-yl)ethan-1-one (7ak)

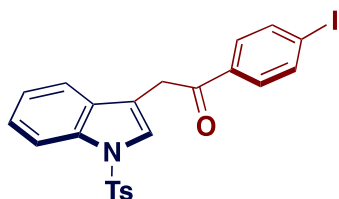

313.3 mg, 61% yield. colorless oil; <sup>1</sup>H NMR (500 MHz, CDCl<sub>3</sub>) δ: 7.96 (d, *J* = 8.6 Hz, 1H), 7.80 (d, *J* = 8.6 Hz, 2H), 7.69 (d, *J* = 1.7 Hz, 2H), 7.67 (d, *J* = 1.7 Hz, 2H), 7.51 (s, 1H), 7.45 (d, *J* = 8.0 Hz, 1H), 7.31 (t, *J* = 7.5 Hz, 1H), 7.23 (t, *J* = 7.5 Hz, 1H), 7.16 (d, *J* = 8.0 Hz, 2H), 4.26 (s, 2H), 2.32 (s, 3H); <sup>13</sup>C NMR (125 MHz, CDCl<sub>3</sub>) δ: 195.7, 145.0, 138.1, 138.0, 135.5, 135.2, 135.1, 130.6, 129.9, 126.8, 125.1, 125.0, 123.5, 119.6, 115.6, 113.9, 101.5, 35.3, 21.7; HRMS (ESI) *m/z*: 537.9950 (Calcd for C<sub>23</sub>H<sub>18</sub>INNaO<sub>3</sub>S [M+Na]<sup>+</sup>: 537.9950).

#### Procedure for Gram-Scale Synthesis of 7aa (Scheme 4)

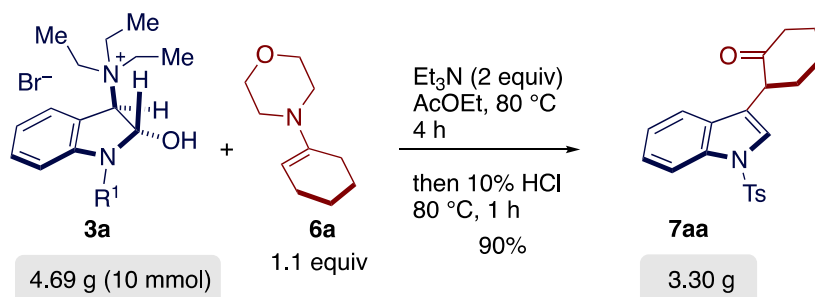

A mixture of **3a** (4.69 g, 10 mmol), **6a** (1.84 g, 11 mmol) and Et<sub>3</sub>N (2.8 mL, 20 mmol) in AcOEt (100 mL) was heated at 80 °C with stirring for 4 h. After cooling to room temperature, 10% aq. HCl (50 mL) was added to the mixture. Then the mixture was heated at 80 °C for 1 h. After cooling to room temperature, the whole was extracted with AcOEt (3 x 100 mL), washed with brine (50 mL). The organic layer was dried over MgSO<sub>4</sub> and concentrated *in vacuo*. The residue was purified by silica gel column chromatography (AcOEt:hexane = 1:5–1:2 then CHCl<sub>3</sub>:hexane = 1:1) to give **7aa** (3.30 g, 90%).

#### Procedure for Gram-Scale Synthesis of 7ab (Scheme 4)

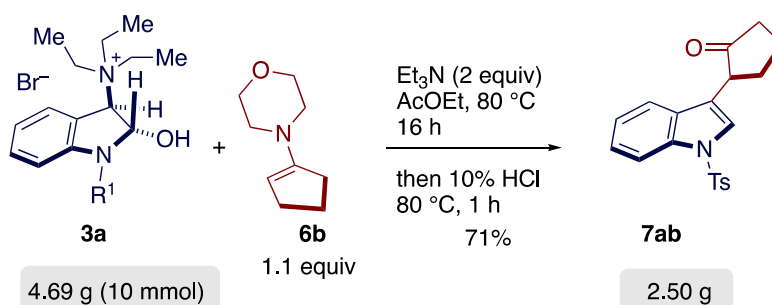

A mixture of **3a** (4.69 g, 10 mmol), **6b** (1.69 g, 11 mmol) and Et<sub>3</sub>N (2.8 mL, 20 mmol) in AcOEt (100 mL) was

heated at 80 °C with stirring for 16 h. After cooling to room temperature, 10% aq. HCl (50 mL) was added to the mixture. Then the mixture was heated at 80 °C for 1 h. After cooling to room temperature, the whole was extracted with AcOEt (3 x 100 mL), washed with brine (50 mL). The organic layer was dried over MgSO<sub>4</sub> and concentrated *in vacuo*. The residue was purified by silica gel column chromatography (AcOEt:hexane = 1:5–1:2 then CHCl<sub>3</sub>:hexane = 1:1) to give **7ab** (2.50 g, 71%).

### General Procedure for Synthesis of Bisindoles using In(OTf)<sub>3</sub> (Scheme 5)

To a solution of **7aa** (367.5 mg, 1.0 mmol) or **7ab** (353.4 mg, 1.0 mmol) and 2-methylindole (262.2 mg, 2.0 mmol) or indole (234.1 mg, 2.0 mmol) in MeCN (10 mL) was added In(OTf)<sub>3</sub> (56.2 mg, 0.1 mmol) at room temperature and the mixture was stirred at 100 °C for 16 h. After cooling to room temperature, the whole was extracted with AcOEt (3 x 20 mL), washed with brine (20 mL). The organic layer was dried over MgSO<sub>4</sub> and concentrated *in vacuo*. The residue was purified by silica gel column chromatography (CHCl<sub>3</sub>:hexane = 1:1) to give bisindoles.

#### 2-Methyl-3-(2-(1-tosyl-1*H*-indol-3-yl)cyclohex-1-en-1-yl)-1*H*-indole (**8**)

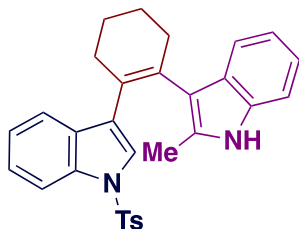

268.2 mg, 56% yield. colorless oil; <sup>1</sup>H NMR (500 MHz, CDCl<sub>3</sub>) δ: 7.75 (d, *J* = 8.6 Hz, 1H), 7.48 (dd, *J* = 1.7, 6.9 Hz, 1H), 7.37 (br s, 1H), 7.33 (d, *J* = 8.6 Hz, 2H), 7.17 (d, *J* = 7.5 Hz, 2H), 7.13 (dd, *J* = 1.8, 5.8 Hz, 1H), 7.02–7.09 (m, 5H), 6.87 (t, *J* = 7.4 Hz, 1H), 2.72–2.76 (m, 1H), 2.56–2.65 (m, 1H), 2.37–2.50 (m, 1H), 2.31 (s, 3H), 2.20–2.33 (m, 1H), 1.86–1.98 (m, 4H), 1.79 (s, 3H); <sup>13</sup>C NMR (125 MHz, CDCl<sub>3</sub>) δ: 144.5, 135.3, 135.2, 134.7, 131.4, 130.7, 130.1, 129.8, 128.4, 128.1, 126.6, 126.2, 124.0, 123.5, 122.6, 121.1, 120.9, 119.5, 119.0, 115.9, 113.3, 110.2, 32.0, 31.9, 23.6, 23.4, 21.7, 12.4; HRMS (ESI) *m/z*: 503.1768 (Calcd for C<sub>30</sub>H<sub>28</sub>N<sub>2</sub>NaO<sub>2</sub>S [M+Na]<sup>+</sup>: 503.1769).

#### 2-Methyl-3-(2-(1-tosyl-1*H*-indol-3-yl)cyclopent-1-en-1-yl)-1*H*-indole (**9**)

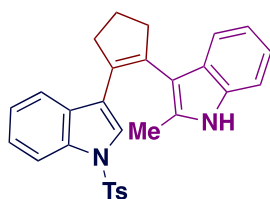

318.2 mg, 68% yield. colorless oil; <sup>1</sup>H NMR (500 MHz, CDCl<sub>3</sub>) δ: 7.90 (d, *J* = 8.6 Hz, 1H), 7.64 (br s, 1H), 7.57 (d, *J* = 8.6 Hz, 2H), 7.48 (d, *J* = 8.0 Hz, 1H), 7.38 (s, 1H), 7.22 (d, *J* = 8.0 Hz, 1H), 7.11–7.16 (m, 4H), 7.03 (t, *J* = 8.1 Hz, 1H), 6.93 (d, *J* = 8.0 Hz, 1H), 6.83 (t, *J* = 8.0 Hz, 1H), 3.06 (t, *J* = 7.5 Hz, 4H), 2.32 (s, 3H), 2.17 (quint, *J* = 7.4 Hz, 2H), 1.67 (s, 3H); <sup>13</sup>C NMR (125 MHz, CDCl<sub>3</sub>) δ: 144.7, 135.6, 135.1, 135.0, 134.1, 132.1, 129.8, 129.6, 129.5, 127.9, 126.8, 124.2, 124.1, 122.8, 122.2, 121.9, 121.2, 119.7, 119.6, 113.5, 111.5, 110.4, 38.8, 38.0, 23.3, 21.6, 12.7; HRMS (ESI) *m/z*: 489.1612 (Calcd for C<sub>29</sub>H<sub>26</sub>N<sub>2</sub>NaO<sub>2</sub>S [M+Na]<sup>+</sup>: 489.1613).

### 3-(2-(1*H*-Indol-3-yl)cyclopent-1-en-1-yl)-1-tosyl-1*H*-indole (10)

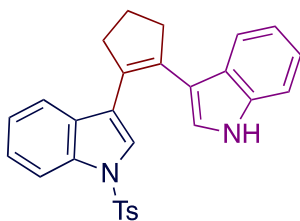

234.0 mg, 52% yield. colorless oil;  $^1\text{H}$  NMR (500 MHz,  $\text{CDCl}_3$ )  $\delta$ : 7.95 (br s, 1H), 7.88 (d,  $J = 8.6$  Hz, 1H), 7.59 (d,  $J = 8.6$  Hz, 2H), 7.40 (s, 1H), 7.28 (d,  $J = 8.0$  Hz, 2H), 7.16–7.17 (m, 3H), 7.07–7.10 (m, 2H), 6.91 (t,  $J = 7.5$  Hz, 1H), 6.87 (d,  $J = 2.3$  Hz, 1H), 6.76 (t,  $J = 8.5$  Hz, 1H), 3.04–3.08 (m, 2H), 2.93–2.95 (m, 2H), 2.35 (s, 3H), 2.14 (quint,  $J = 7.4$  Hz, 2H);  $^{13}\text{C}$  NMR (125 MHz,  $\text{CDCl}_3$ )  $\delta$ : 144.7, 136.0, 135.3, 135.0, 133.6, 129.9, 129.6, 127.1, 126.9, 125.9, 124.2, 123.6, 122.8, 122.1, 121.9, 121.7, 121.1, 119.7, 114.6, 113.4, 111.1, 39.0, 38.9, 22.8, 21.7; HRMS (ESI)  $m/z$ : 475.1457 (Calcd for  $\text{C}_{28}\text{H}_{24}\text{N}_2\text{NaO}_2\text{S}$   $[\text{M}+\text{Na}]^+$ : 475.1456).

### General Procedure for Synthesis of Enamines (Scheme 6a)

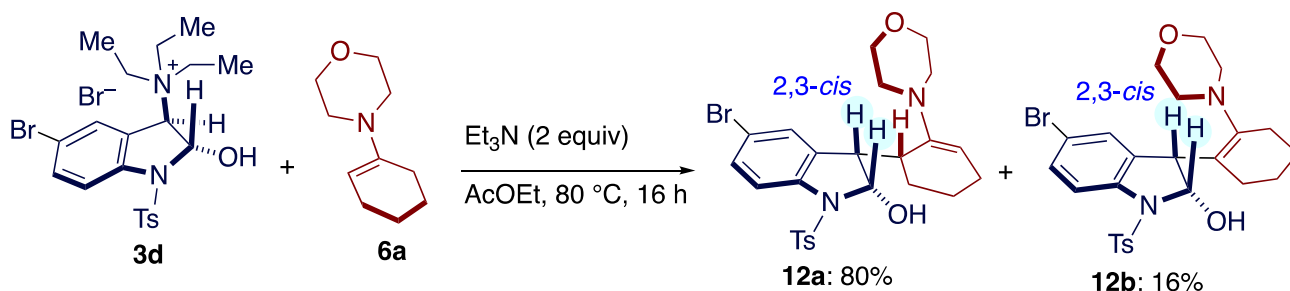

A mixture of **3d** (548.3 mg, 1.0 mmol), **6a** (184 mg, 1.1 mmol) and  $\text{Et}_3\text{N}$  (0.28 mL, 2.0 mmol) in  $\text{AcOEt}$  (10 mL) was heated at  $80^\circ\text{C}$  with stirring for 16 h. After cooling to room temperature,  $\text{H}_2\text{O}$  (10 mL) was added to the mixture. The whole was extracted with  $\text{AcOEt}$  (3 x 20 mL), washed with brine (20 mL). The organic layer was dried over  $\text{MgSO}_4$  and concentrated *in vacuo*. The residue was purified by silica gel column chromatography ( $\text{AcOEt}$ :hexane = 1:5–1:2 then  $\text{CHCl}_3$ :hexane = 1:1) to give **12a** (425.2 mg, 80% yield) and **12b** (86.4 mg, 16% yield).

### *Rel*-(2*S*,3*S*)-5-bromo-3-((*R*)-2-morpholinocyclohex-2-en-1-yl)-1-tosylindolin-2-ol (**12a**)

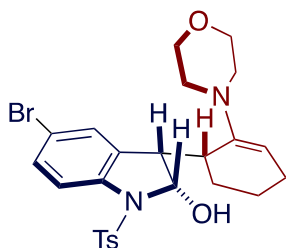

425.2 mg, 80% yield. colorless solid;  $^1\text{H}$  NMR (500 MHz,  $\text{CDCl}_3$ )  $\delta$ : 7.82 (d,  $J = 8.6$  Hz, 2H), 7.23–7.28 (m, 5H), 7.11 (s, 1H), 5.99 (d,  $J = 7.5$  Hz, 1H), 4.14 (t,  $J = 8.0$  Hz, 1H), 3.64–3.72 (m, 4H), 2.79–2.80 (m, 2H), 2.54–2.58 (m, 2H), 2.45 (dt,  $J = 7.4, 6.3$  Hz, 1H), 2.38 (s, 3H), 1.40–1.52 (m, 2H), 1.10–1.17 (m, 2H), 0.94–1.00 (m, 1H), 0.40–

0.47 (m, 1H);  $^{13}\text{C}$  NMR (125 MHz,  $\text{CDCl}_3$ )  $\delta$ : 144.3, 141.6, 136.2, 132.1, 131.1, 129.7, 128.9, 127.6, 115.5, 114.8, 99.0, 94.8, 67.8, 49.8, 45.7, 40.7, 27.0, 24.3, 24.2, 21.7, 21.5; HRMS (ESI)  $m/z$ : 555.0929, 557.0908 (Calcd for  $\text{C}_{25}\text{H}_{29}\text{BrN}_2\text{NaO}_4\text{S}$   $[\text{M}+\text{Na}]^+$ : 555.0929, 557.0909).

***Rel*-(2*S*,3*S*)-5-bromo-3-(2-morpholinocyclohex-1-en-1-yl)-1-tosylindolin-2-ol (12b)**

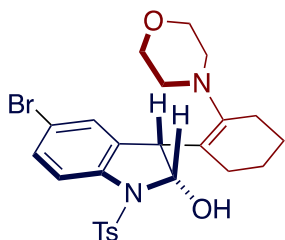

86.4 mg, 16% yield. colorless solid;  $^1\text{H}$  NMR (500 MHz,  $\text{CDCl}_3$ )  $\delta$ : 7.74 (d,  $J$  = 8.6 Hz, 2H), 7.34 (d,  $J$  = 9.2 Hz, 1H), 7.23–7.27 (m, 4H), 7.11 (s, 1H), 6.18 (d,  $J$  = 7.4 Hz, 1H), 3.32 (d,  $J$  = 6.9 Hz, 1H), 3.08 (m, 2H), 2.54 (m, 2H), 2.47 (dd,  $J$  = 11.5, 6.3 Hz, 1H), 2.37 (s, 3H), 2.12–2.16 (m, 2H), 1.89–1.96 (m, 2H), 1.58–1.64 (m, 3H), 1.32–1.42 (m, 2H), 1.05–1.08 (m, 2H);  $^{13}\text{C}$  NMR (125 MHz,  $\text{CDCl}_3$ )  $\delta$ : 144.3, 141.3, 136.8, 136.2, 130.2, 129.9, 127.1, 126.0, 115.6, 115.1, 98.9, 95.3, 66.5, 53.2, 45.9, 43.6, 31.9, 24.4, 23.8, 21.8, 21.6; HRMS (ESI)  $m/z$ : 555.0928, 557.0909 (Calcd for  $\text{C}_{25}\text{H}_{29}\text{BrN}_2\text{NaO}_4\text{S}$   $[\text{M}+\text{Na}]^+$ : 555.0929, 557.0909).

**Conversion of 12a into 7da (Scheme 6b)**

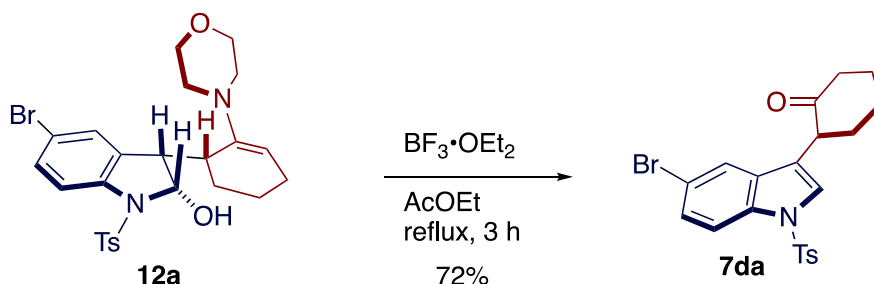

To a solution of **12a** (53.4 mg, 0.1 mmol) in AcOEt (2 mL) was added  $\text{BF}_3 \cdot \text{Et}_2\text{O}$  (0.06 mL, 0.5 mmol) and heated at 90 °C (oil bath) with stirring for 3 h. After cooling to room temperature, saturated aq.  $\text{NaHCO}_3$  was added to the mixture. The whole was extracted with AcOEt (3 x 10 mL), washed with brine (10 mL). The organic layer was dried over  $\text{MgSO}_4$  and concentrated *in vacuo*. The residue was purified by silica gel column chromatography ( $\text{CHCl}_3$ :hexane = 1:1) to give **7da** (32.3 mg, 72% yield).

### Conversion of 12b into 7da (Scheme 6c)

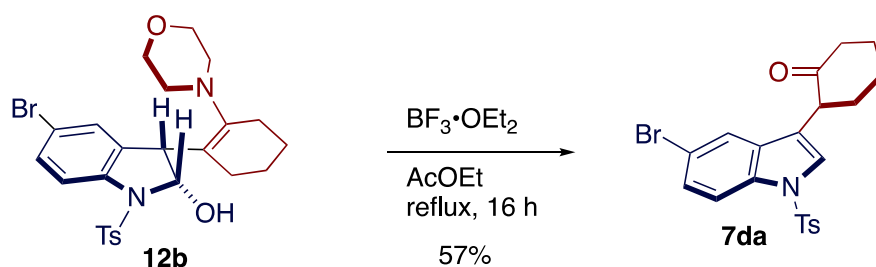

To a solution of **12a** (53.4 mg, 0.1 mmol) in  $\text{AcOEt}$  (2 mL) was added  $\text{BF}_3 \cdot \text{Et}_2\text{O}$  (0.06 mL, 0.5 mmol) and heated at 90 °C (oil bath) with stirring for 16 h. After cooling to room temperature, saturated aq.  $\text{NaHCO}_3$  was added to the mixture. The whole was extracted with  $\text{AcOEt}$  (3 x 10 mL), washed with brine (10 mL). The organic layer was dried over  $\text{MgSO}_4$  and concentrated *in vacuo*. The residue was purified by silica gel column chromatography ( $\text{CHCl}_3$ :hexane = 1:1) to give **7da** (30.4 mg, 57% yield).

### 3. Supplementary References

- (S1) Abe, T.; Kosaka, Y.; Kawasaki, T.; Ohata, Y.; Yamada, K. *Chem. Pharm Bull.*, **2020**, 68; 555–558.  
(S2) Abe, T.; Suzuki, T.; Anada, M.; Matsunaga, S.; Yamada, K.; *Org. Lett.*, **2017**, 19, 4275–4278.  
(S3) Hirao, S.; Yamashiro, T.; Kohira, K.; Mishima, N.; Abe, T. *Chem. Commun.* **2020**, 56, 5139–5142.  
(S4) Xing, D.; Dong, G. *J. Am. Chem. Soc.*, **2017**, 139, 13664–13667.

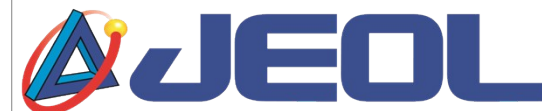

Filename = YT-20-06-11-3-6.jdf  
 Author = delta  
 Experiment = single\_pulse.ex2  
 Sample\_id = 5br  
 Solvent = DMSO-D6  
 Creation\_time = 11-JUN-2020 15:41:56  
 Revision\_time = 8-JUL-2020 17:39:28  
 Current\_time = 8-JUL-2020 17:42:09

Content = single\_pulse  
 Data\_format = 1D COMPLEX  
 Dim\_size = 13107  
 Dim\_title = 1H  
 Dim\_units = [ppm]  
 Dimensions = X  
 Site = ECA 500  
 Spectrometer = DELTA2\_NMR

Field\_strength = 11.62926421[T] (500[M]  
 X\_acq\_duration = 1.76422912[s]  
 X\_domain = 1H  
 X\_freq = 495.13191398[MHz]  
 X\_offset = 5[ppm]  
 X\_points = 16384  
 X\_prescans = 1  
 X\_resolution = 0.5668198[Hz]  
 X\_sweep = 9.28677563[kHz]  
 Irr\_domain = 1H  
 Irr\_freq = 495.13191398[MHz]  
 Irr\_offset = 5[ppm]  
 Tri\_domain = 1H  
 Tri\_freq = 495.13191398[MHz]  
 Tri\_offset = 5[ppm]  
 Clipped = FALSE  
 Mod\_return = 1  
 Scans = 8  
 Total\_scans = 8

X\_90\_width = 11.3[us]  
 X\_acq\_time = 1.76422912[s]  
 X\_angle = 45[deg]  
 X\_atn = 3.3[dB]  
 X\_pulse = 5.65[us]  
 Irr\_mode = Off  
 Tri\_mode = Off  
 Dante\_presat = FALSE  
 Initial\_wait = 1[s]  
 Recvr\_gain = 48  
 Relaxation\_delay = 5[s]  
 Repetition\_time = 6.76422912[s]  
 Temp\_get = 24.2[degC]

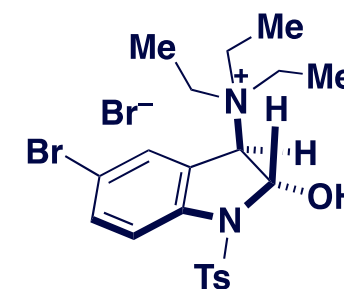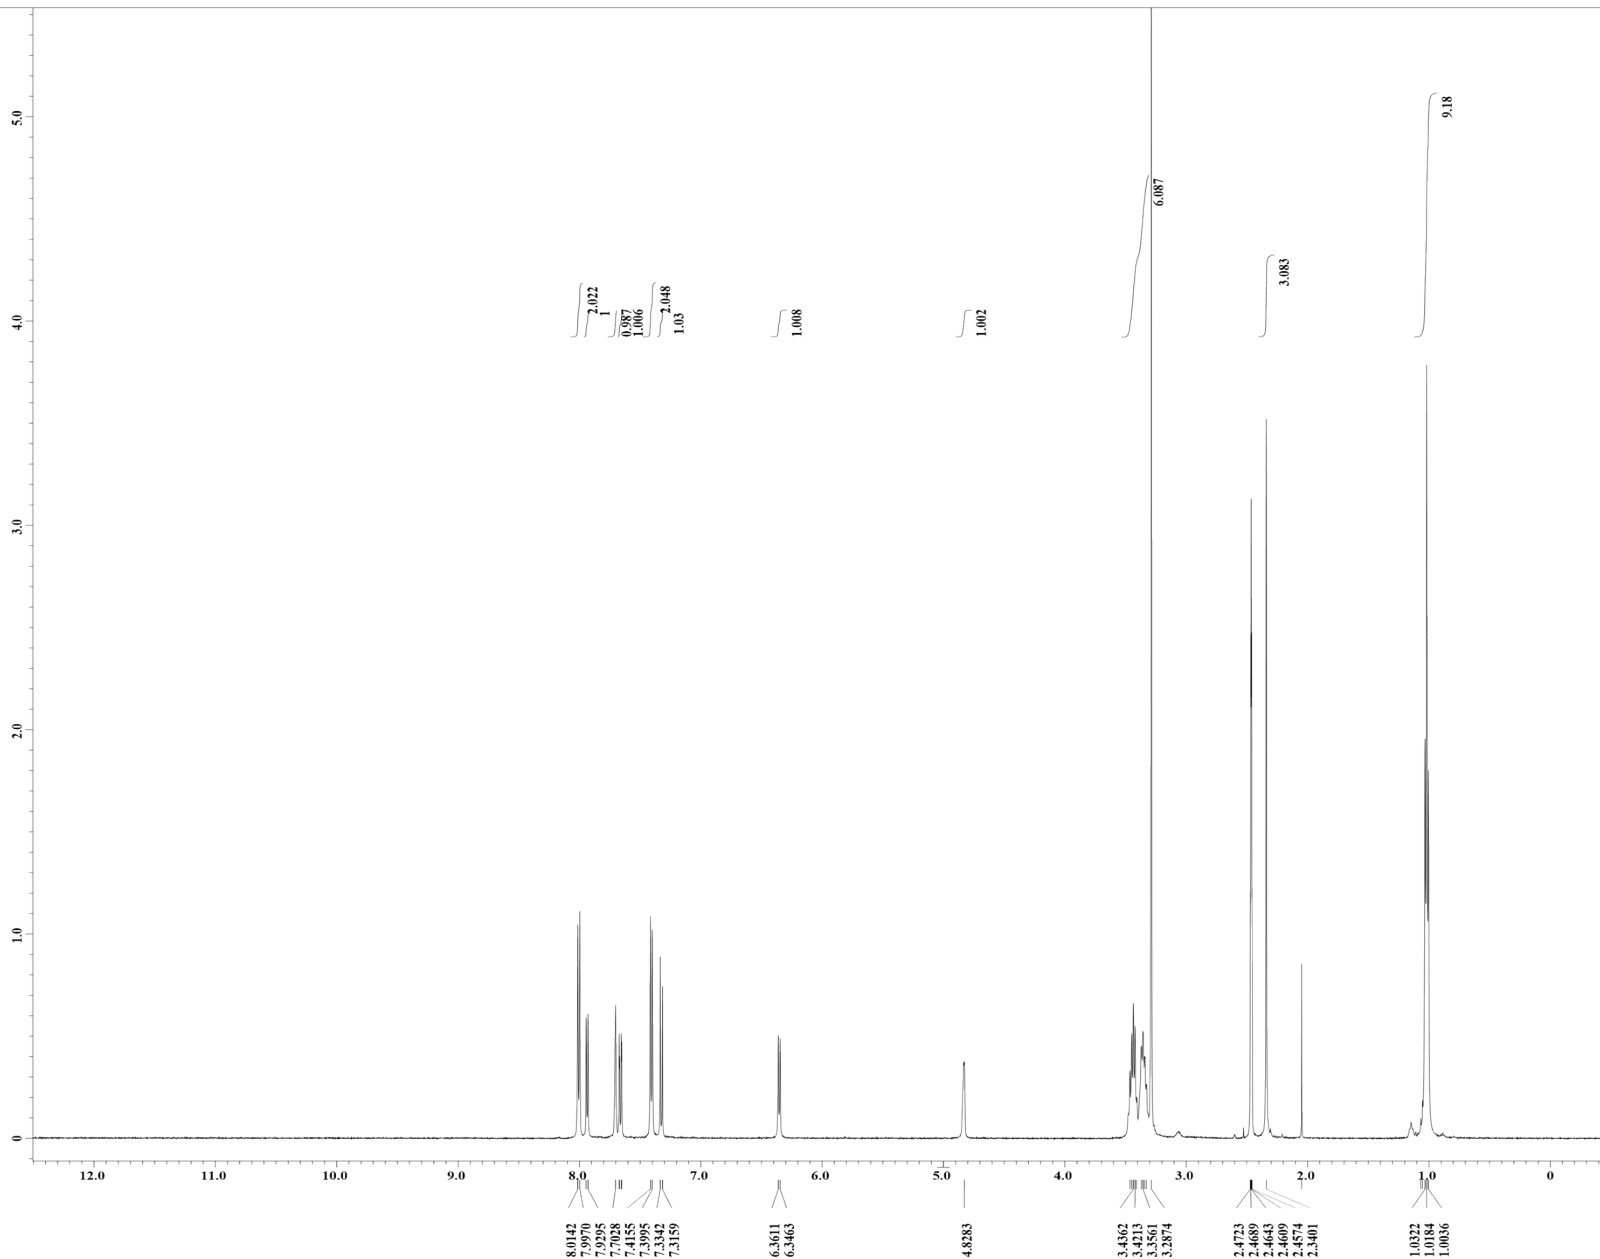

X : parts per Million : 1H

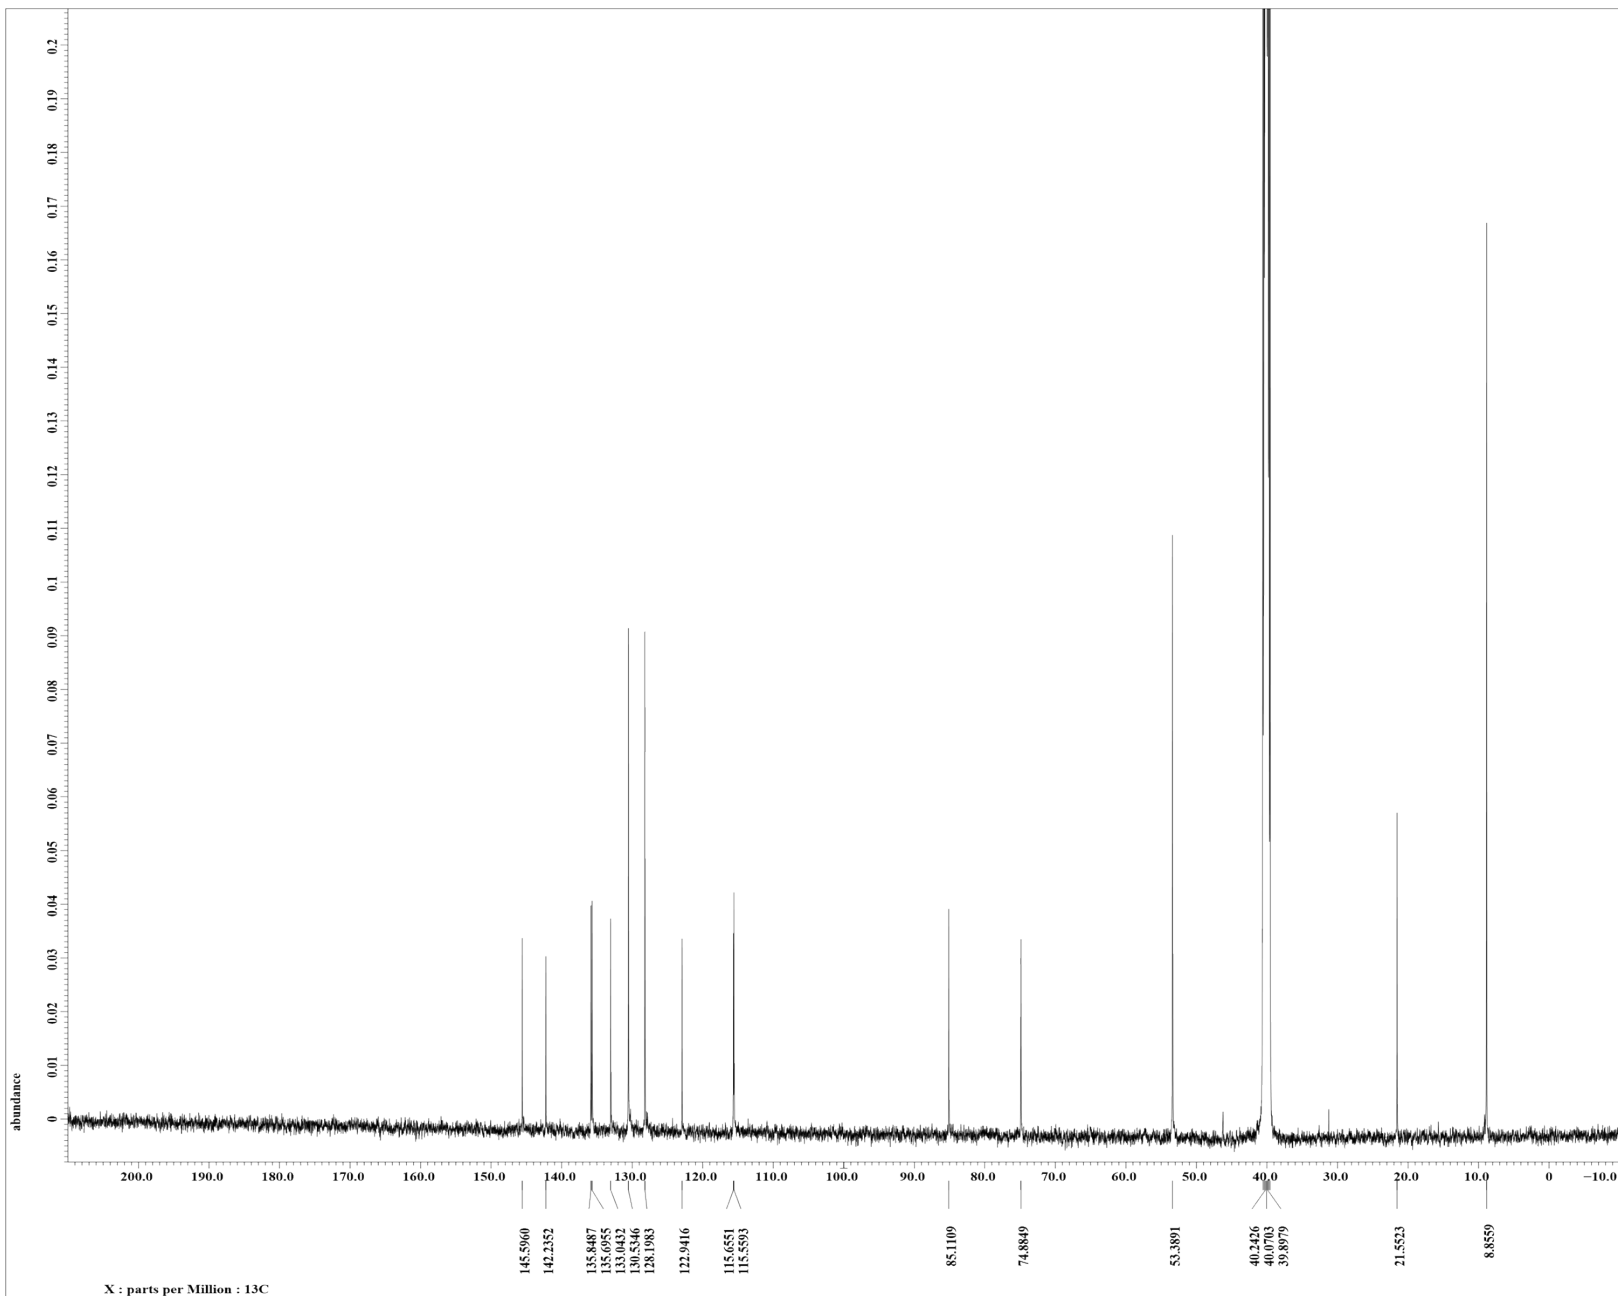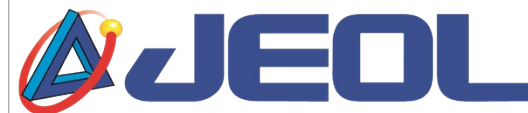

Filename = YT-20-06-11-3-4.jdf  
 Author = delta  
 Experiment = single\_pulse\_dec  
 Sample id = 5br  
 Solvent = DMSO-D6  
 Creation time = 12-JUN-2020 08:56:36  
 Revision time = 8-JUL-2020 17:42:47  
 Current time = 8-JUL-2020 17:43:10

Content = single pulse decouple  
 Data format = 1D COMPLEX  
 Dim Size = 26214  
 Dim title = 13C  
 Dim units = [ppm]  
 Dimensions = X  
 Site = ECA 500  
 Spectrometer = DELTA2\_NMR

Field strength = 11.62926421[T] (500[M]  
 X\_acq\_duration = 0.8388608[s]  
 X\_domain = 13C  
 X\_freq = 124.5010059[MHz]  
 X\_offset = 100[ppm]  
 X\_points = 32768  
 X\_prescans = 4  
 X\_resolution = 1.1920929[Hz]  
 X\_sweep = 39.0625[kHz]  
 Irr\_domain = 1H  
 Irr\_freq = 495.13191398[MHz]  
 Irr\_offset = 5[ppm]  
 Clipped = FALSE  
 Mod return = 1  
 Scans = 21840  
 Total\_scans = 21840

X\_90\_width = 10.1[us]  
 X\_acq\_time = 0.8388608[s]  
 X\_angle = 30[deg]  
 X\_atn = 9.5[dB]  
 X\_pulse = 3.36666667[us]  
 Irr\_atn\_dec = 21.51[dB]  
 Irr\_atn\_noe = 21.51[dB]  
 Irr\_noise = WALTZ  
 Decoupling = TRUE  
 Initial\_wait = 1[s]  
 Noe = TRUE  
 Noe\_time = 2[s]  
 RecVr\_gain = 60  
 Relaxation\_delay = 2[s]  
 Repetition\_time = 2.8388608[s]  
 Temp\_get = 24.9[dC]

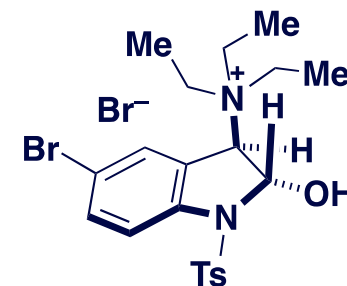



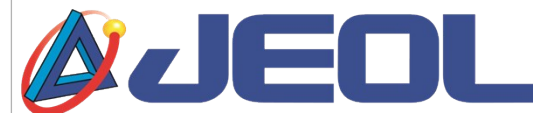

Filename = YT-20-07-07-7-6.jdf  
 Author = delta  
 Experiment = single\_pulse.ex2  
 Sample\_id = 4c1  
 Solvent = ACETONE-D6  
 Creation\_time = 22-SEP-2000 18:56:20  
 Revision\_time = 8-JUL-2020 17:12:12  
 Current\_time = 8-JUL-2020 17:12:24

Content = single\_pulse  
 Data\_format = 1D COMPLEX  
 Dim\_size = 13107  
 Dim\_title = 1H  
 Dim\_units = [ppm]  
 Dimensions = X  
 Site = ECA500  
 Spectrometer = DELTA2\_NMR

Field\_strength = 11.7473579[T] (500[MH]  
 X\_acq\_duration = 1.74587904[s]  
 X\_domain = 1H  
 X\_freq = 500.15991521[MHz]  
 X\_offset = 5.0[ppm]  
 X\_points = 16384  
 X\_prescans = 1  
 X\_resolution = 0.57277737[Hz]  
 X\_sweep = 9.38438438[kHz]  
 Iir\_domain = 1H  
 Iir\_freq = 500.15991521[MHz]  
 Iir\_offset = 5.0[ppm]  
 Tri\_domain = 1H  
 Tri\_freq = 500.15991521[MHz]  
 Tri\_offset = 5.0[ppm]  
 Clipped = FALSE  
 Mod\_return = 1  
 Scans = 8  
 Total\_scans = 8

X\_90\_width = 12[us]  
 X\_acq\_time = 1.74587904[s]  
 X\_angle = 45[deg]  
 X\_atn = 3.4[dB]  
 X\_pulse = 6[us]  
 Iir\_mode = Off  
 Tri\_mode = Off  
 Dante\_presat = FALSE  
 Initial\_wait = 1[s]  
 Recvr\_gain = 50  
 Relaxation\_delay = 5[s]  
 Repetition\_time = 6.74587904[s]  
 Temp\_get = 23.5[dc]

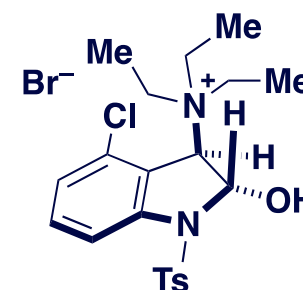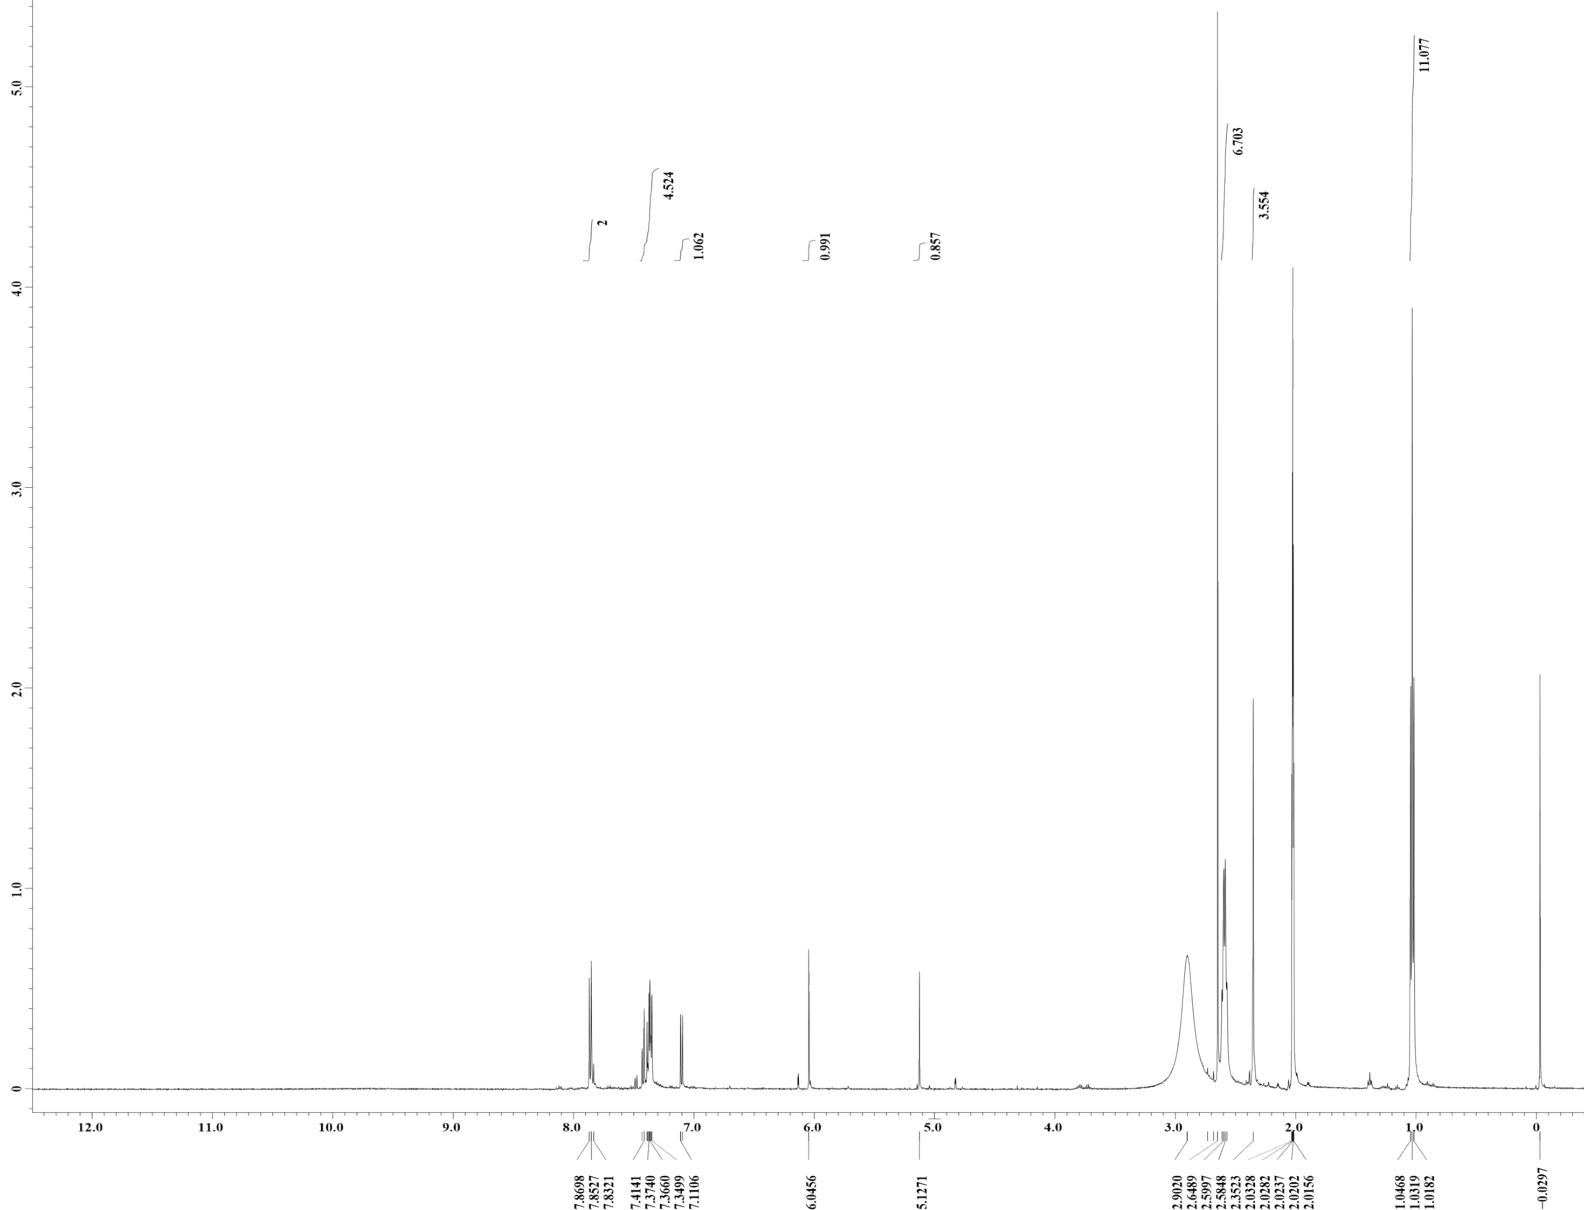

X : parts per Million : 1H

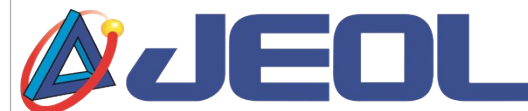

Filename = YT-20-07-07-7-8.jdf  
 Author = delta  
 Experiment = single\_pulse\_dec  
 Sample\_id = 4cl  
 Solvent = ACETONE-D6  
 Creation\_time = 23-SEP-2000 08:59:06  
 Revision\_time = 8-JUL-2020 17:35:34  
 Current\_time = 8-JUL-2020 17:35:44

Content = single pulse decouple  
 Data\_format = 1D COMPLEX  
 Dim\_size = 26214  
 Dim\_title = 13C  
 Dim\_units = [ppm]  
 Dimensions = X  
 Site = ECA500  
 Spectrometer = DELTA2\_NMR

Field\_strength = 11.7473579 [T] (500 [MH])  
 X\_acq\_duration = 0.83361792 [s]  
 X\_domain = 13C  
 X\_freq = 125.76529768 [MHz]  
 X\_offset = 100 [ppm]  
 X\_points = 32768  
 X\_prescans = 4  
 X\_resolution = 1.19959034 [Hz]  
 X\_sweep = 39.3081761 [kHz]  
 Irr\_domain = 1H  
 Irr\_freq = 500.15991521 [MHz]  
 Irr\_offset = 5.0 [ppm]  
 Clipped = FALSE  
 Mod\_return = 1  
 Scans = 17832  
 Total\_scans = 17832

X\_90\_width = 12.8 [us]  
 X\_acq\_time = 0.83361792 [s]  
 X\_angle = 30 [deg]  
 X\_atn = 5.3 [dB]  
 X\_pulse = 4.26666667 [us]  
 Irr\_atn\_dec = 21.09 [dB]  
 Irr\_atn\_noe = 21.09 [dB]  
 Irr\_noise = WALTZ  
 Decoupling = TRUE  
 Initial\_wait = 1 [s]  
 Noe = TRUE  
 Noe\_time = 2 [s]  
 Recvr\_gain = 58  
 Relaxation\_delay = 2 [s]  
 Repetition\_time = 2.83361792 [s]  
 Temp\_get = 23.3 [dc]

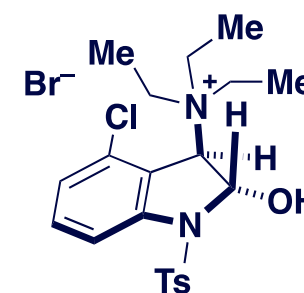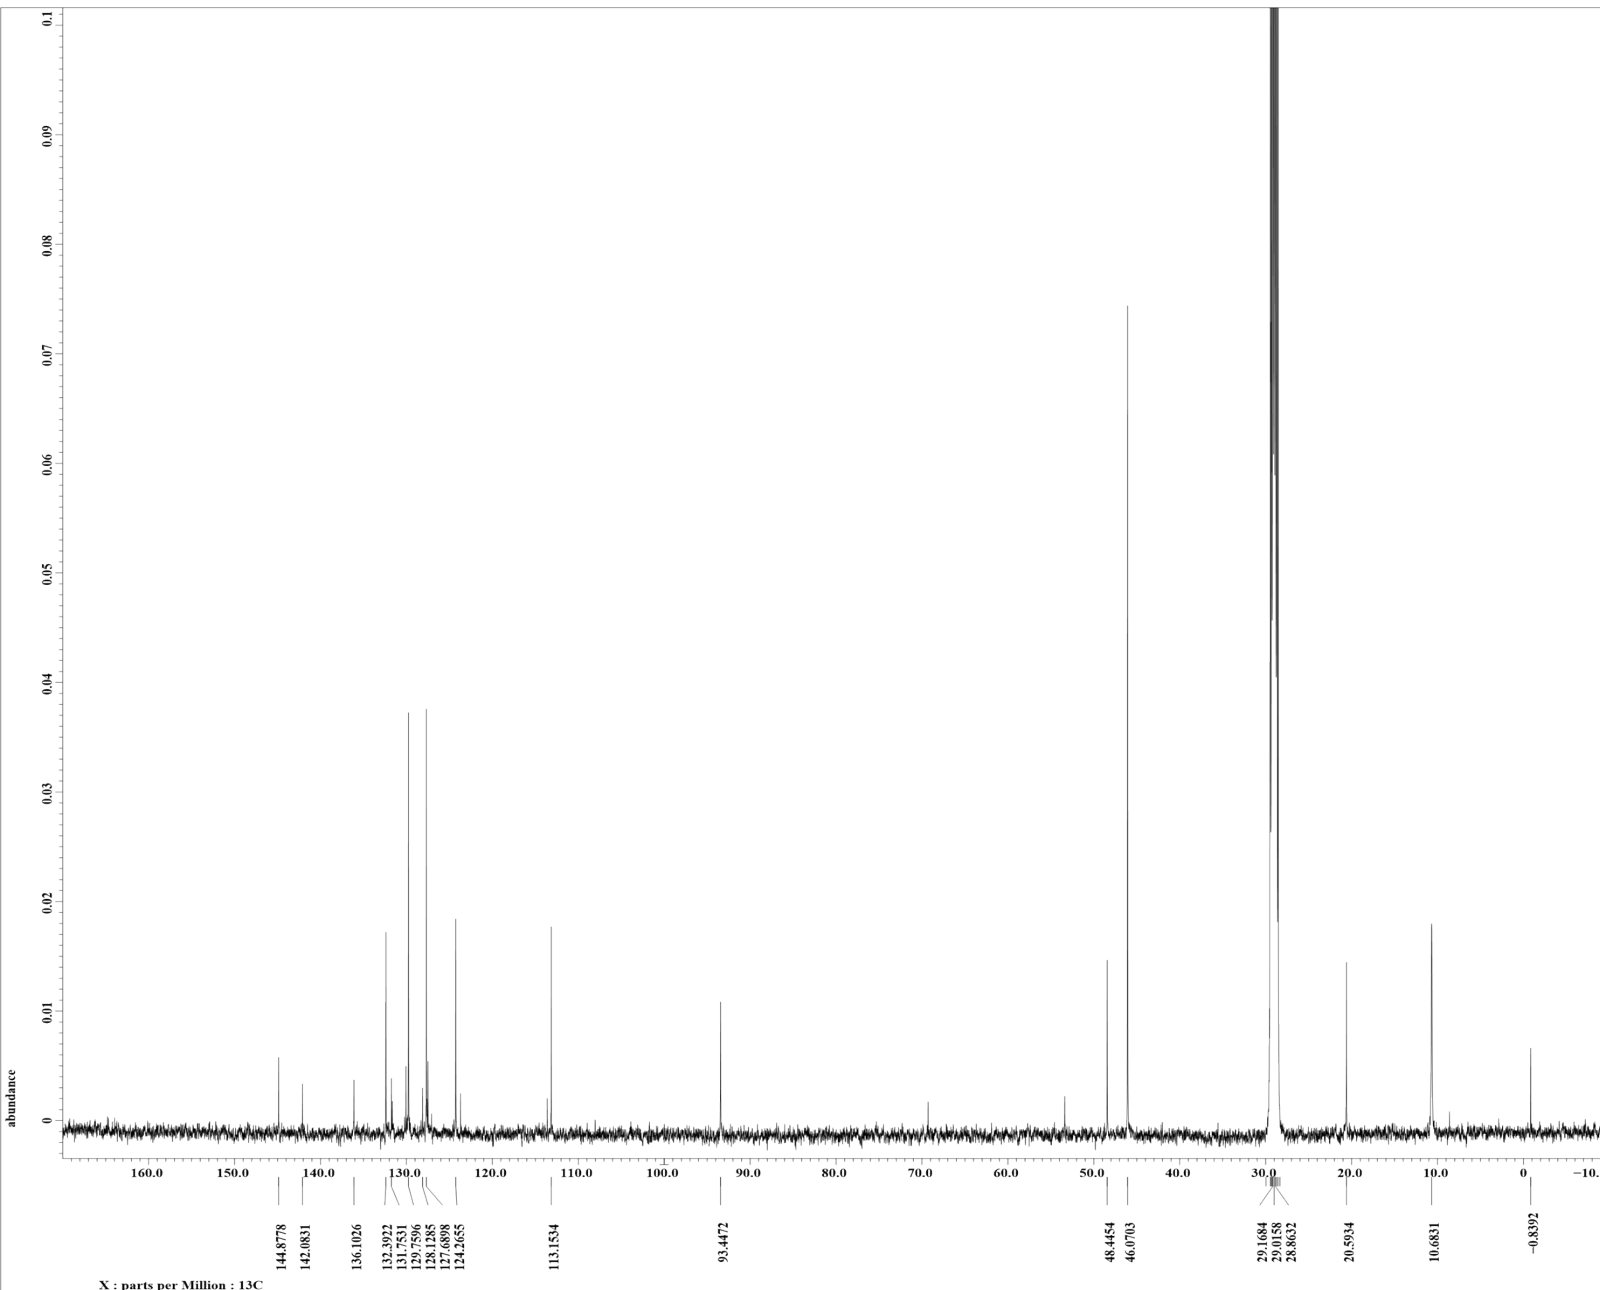

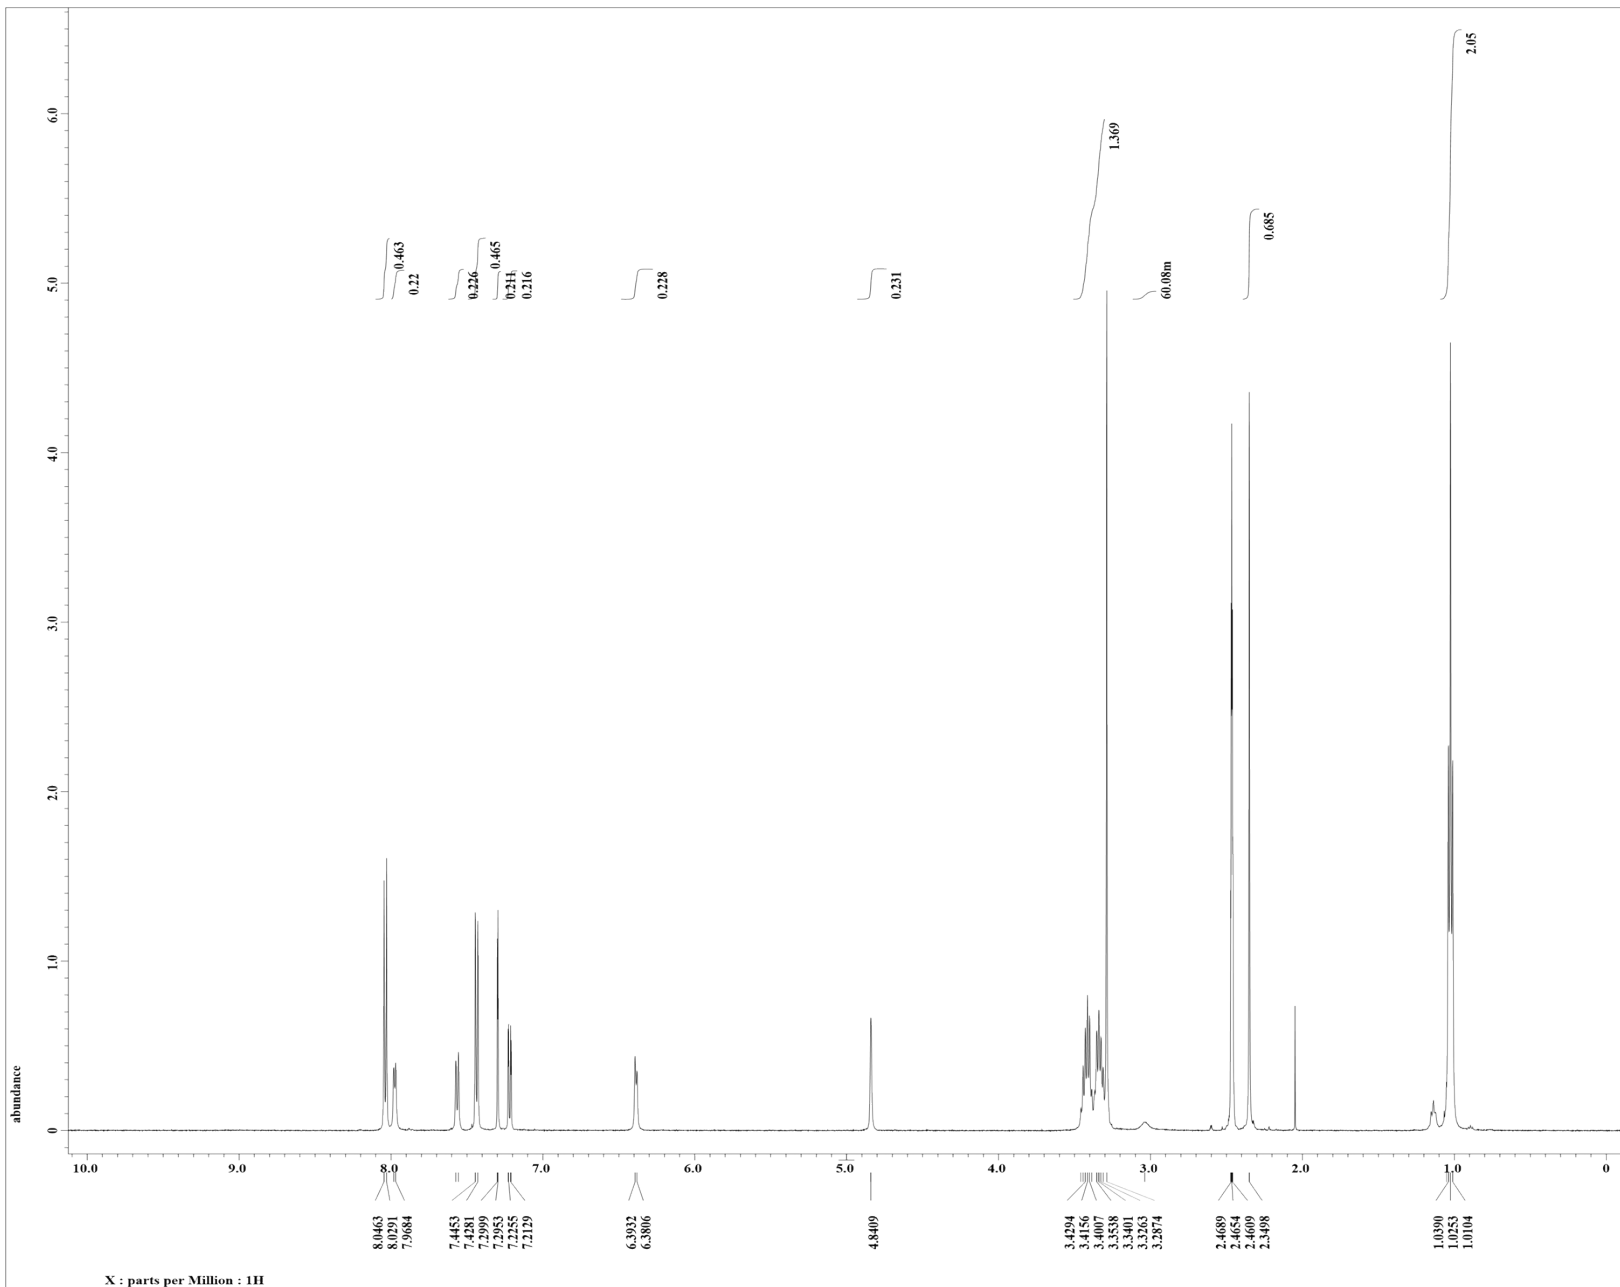


Filename = 6C1-HITAB-4.jdf  
 Author = delta  
 Experiment = single\_pulse.ex2  
 Sample\_id = S#738369  
 Solvent = DMSO-D6  
 Creation\_time = 9-JUN-2020 19:50:31  
 Revision\_time = 9-JUN-2020 20:39:28  
 Current\_time = 9-JUN-2020 20:39:46

Content = 6C1-HITAB-1H-DMSO  
 Data\_format = 1D\_COMPLEX  
 Dim\_size = 13107  
 Dim\_title = 1H  
 Dim\_units = [ppm]  
 Dimensions = X  
 Site = ECA 500  
 Spectrometer = DELTA2\_NMR

Field\_strength = 11.62926421[T] (500[M]  
 X\_acq\_duration = 1.76422912[s]  
 X\_domain = 1H  
 X\_freq = 495.13191398[MHz]  
 X\_offset = 5[ppm]  
 X\_points = 16384  
 X\_prescans = 1  
 X\_resolution = 0.5668198[Hz]  
 X\_sweep = 9.28677563[kHz]  
 IRR\_domain = 1H  
 IRR\_freq = 495.13191398[MHz]  
 IRR\_offset = 5[ppm]  
 Tri\_domain = 1H  
 Tri\_freq = 495.13191398[MHz]  
 Tri\_offset = 5[ppm]  
 Clipped = FALSE  
 Mod\_return = 1  
 Scans = 8  
 Total\_scans = 8

X\_90\_width = 11.3[us]  
 X\_acq\_time = 1.76422912[s]  
 X\_angle = 45[deg]  
 X\_atn = 3.3[dB]  
 X\_pulse = 5.65[us]  
 IRR\_mode = Off  
 Tri\_mode = Off  
 Dante\_presat = FALSE  
 Initial\_wait = 1[s]  
 Recvr\_gain = 48  
 Relaxation\_delay = 5[s]  
 Repetition\_time = 6.76422912[s]  
 Temp\_get = 24.1[degC]

Chemical structure of the compound (a substituted indole derivative) is shown on the right. The structure includes a benzene ring with a chlorine atom (Cl) and a tosyl group (Ts) attached to the indole ring system. The indole ring has a methyl group (Me) and a bromine atom (Br) attached to the nitrogen atom. The chemical shift labels (ppm) are: 8.0463, 8.0291, 7.9684, 7.4453, 7.4281, 7.2999, 7.2953, 7.2856, 7.2129, 6.3932, 6.3806, 4.8409, 3.4294, 3.4156, 3.4007, 3.3538, 3.3401, 3.3263, 3.2874, 2.4689, 2.4654, 2.4628, 2.4498, 1.0390, 1.0253, 1.0104. Integration values are: 0.463, 0.22, 0.226, 0.465, 0.211, 0.216, 0.228, 0.231, 1.369, 60.08m, 0.685, 2.05.

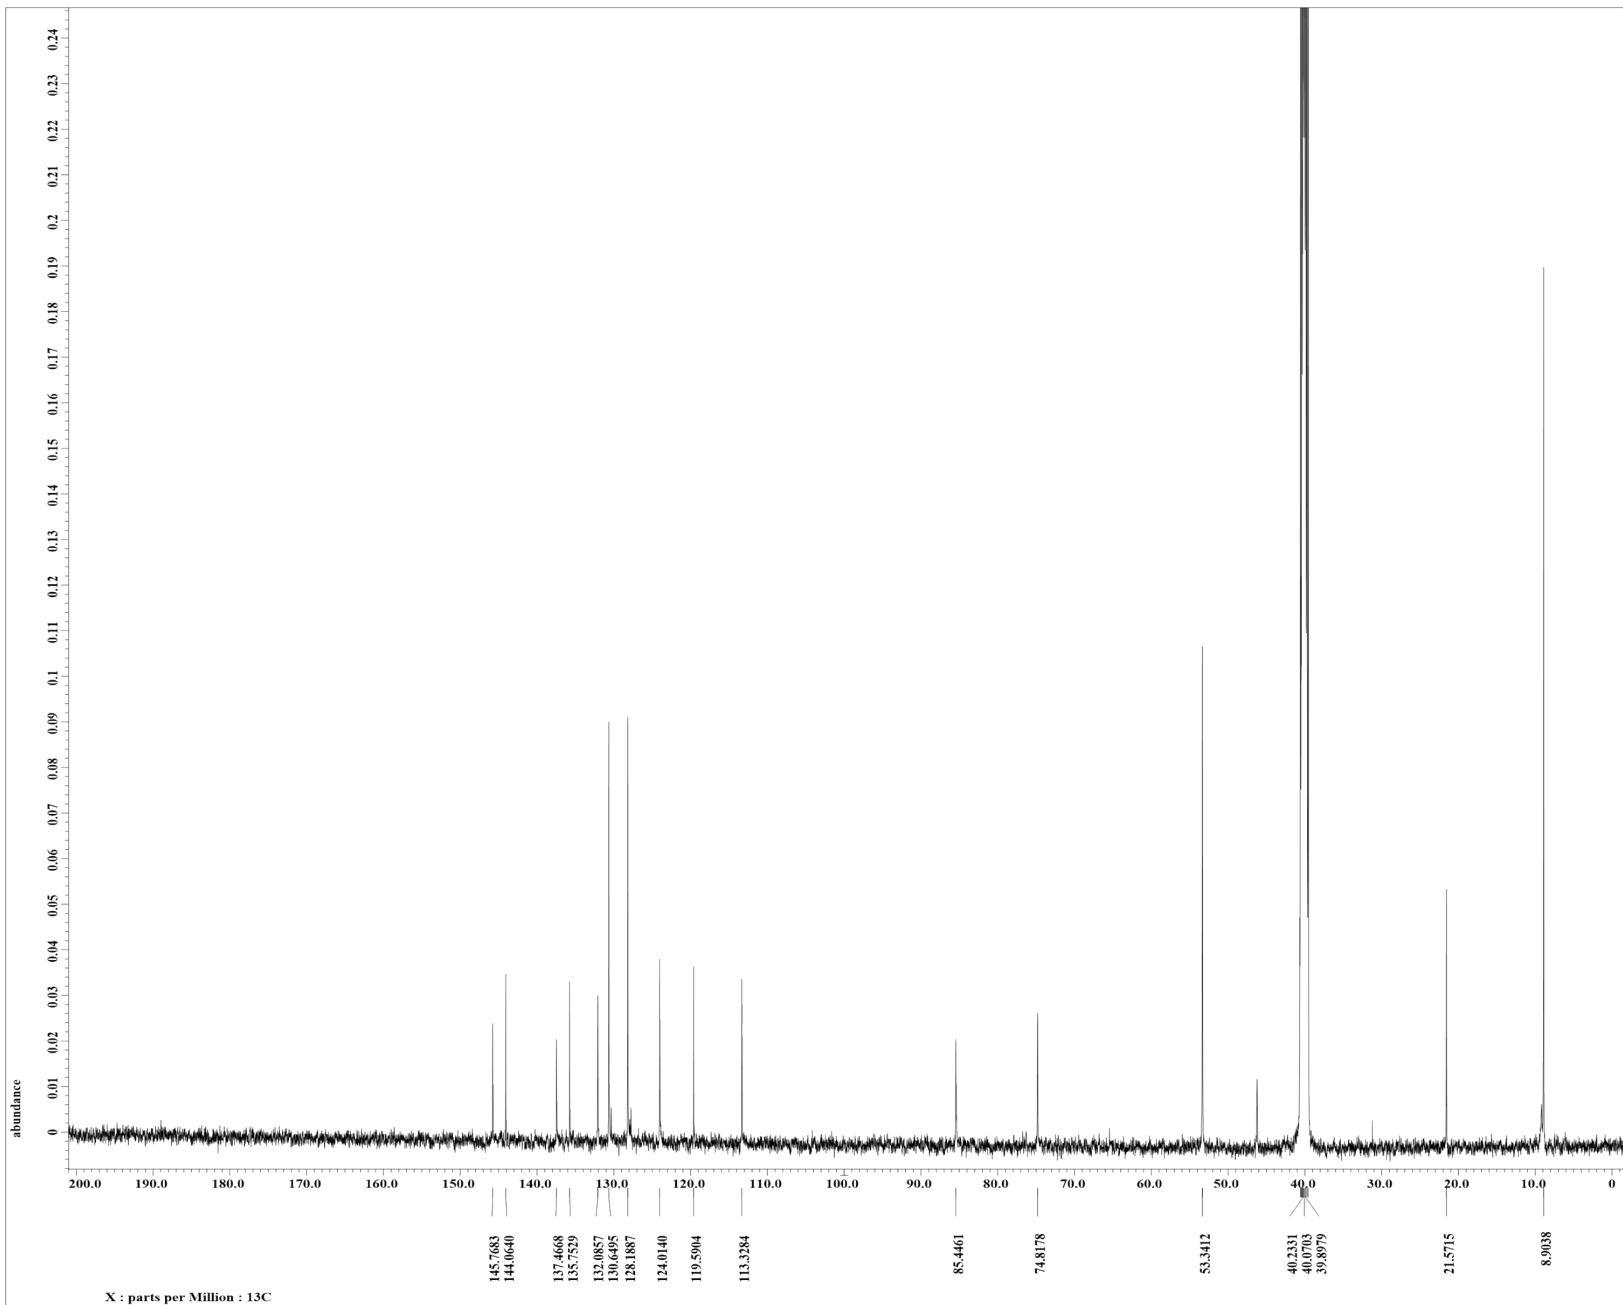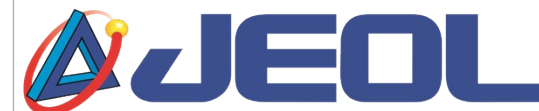

Filename = 6C1-HITAB-3.jdf  
 Author = delta  
 Experiment = single pulse dec  
 Sample\_id = S#739786  
 Solvent = DMSO-D6  
 Creation\_time = 10-JUN-2020 06:32:12  
 Revision\_time = 10-JUN-2020 07:14:28  
 Current\_time = 10-JUN-2020 07:15:21

Content = single pulse decouple  
 Data\_format = 1D COMPLEX  
 Dim\_size = 26214  
 Dim\_title = 13C  
 Dim\_units = [ppm]  
 Dimensions = X  
 Site = ECA 500  
 Spectrometer = DELTA2 NMR

Field\_strength = 11.62926421[T] (500[M]  
 X\_acq\_duration = 0.8388608[s]  
 X\_domain = 13C  
 X\_freq = 124.5010059[MHz]  
 X\_offset = 100[ppm]  
 X\_points = 32768  
 X\_prescans = 4  
 X\_resolution = 1.1920929[Hz]  
 X\_sweep = 39.0625[kHz]  
 Irr\_domain = 1H  
 Irr\_freq = 495.13191398[MHz]  
 Irr\_offset = 5[ppm]  
 Clipped = FALSE  
 Mod\_return = 1  
 Scans = 13526  
 Total\_scans = 13526

X\_90\_width = 10.1[us]  
 X\_acq\_time = 0.8388608[s]  
 X\_angle = 30[deg]  
 X\_atn = 9.5[dB]  
 X\_pulse = 3.36666667[us]  
 Irr\_atn\_dec = 21.51[dB]  
 Irr\_atn\_noe = 21.51[dB]  
 Irr\_noise = WALTZ  
 Decoupling = TRUE  
 Initial\_wait = 1[s]  
 Noe = TRUE  
 Noe\_time = 2[s]  
 RecVr\_gain = 60  
 Relaxation\_delay = 2[s]  
 Repetition\_time = 2.8388608[s]  
 Temp\_get = 25[dc]

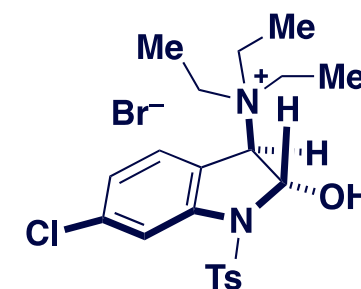

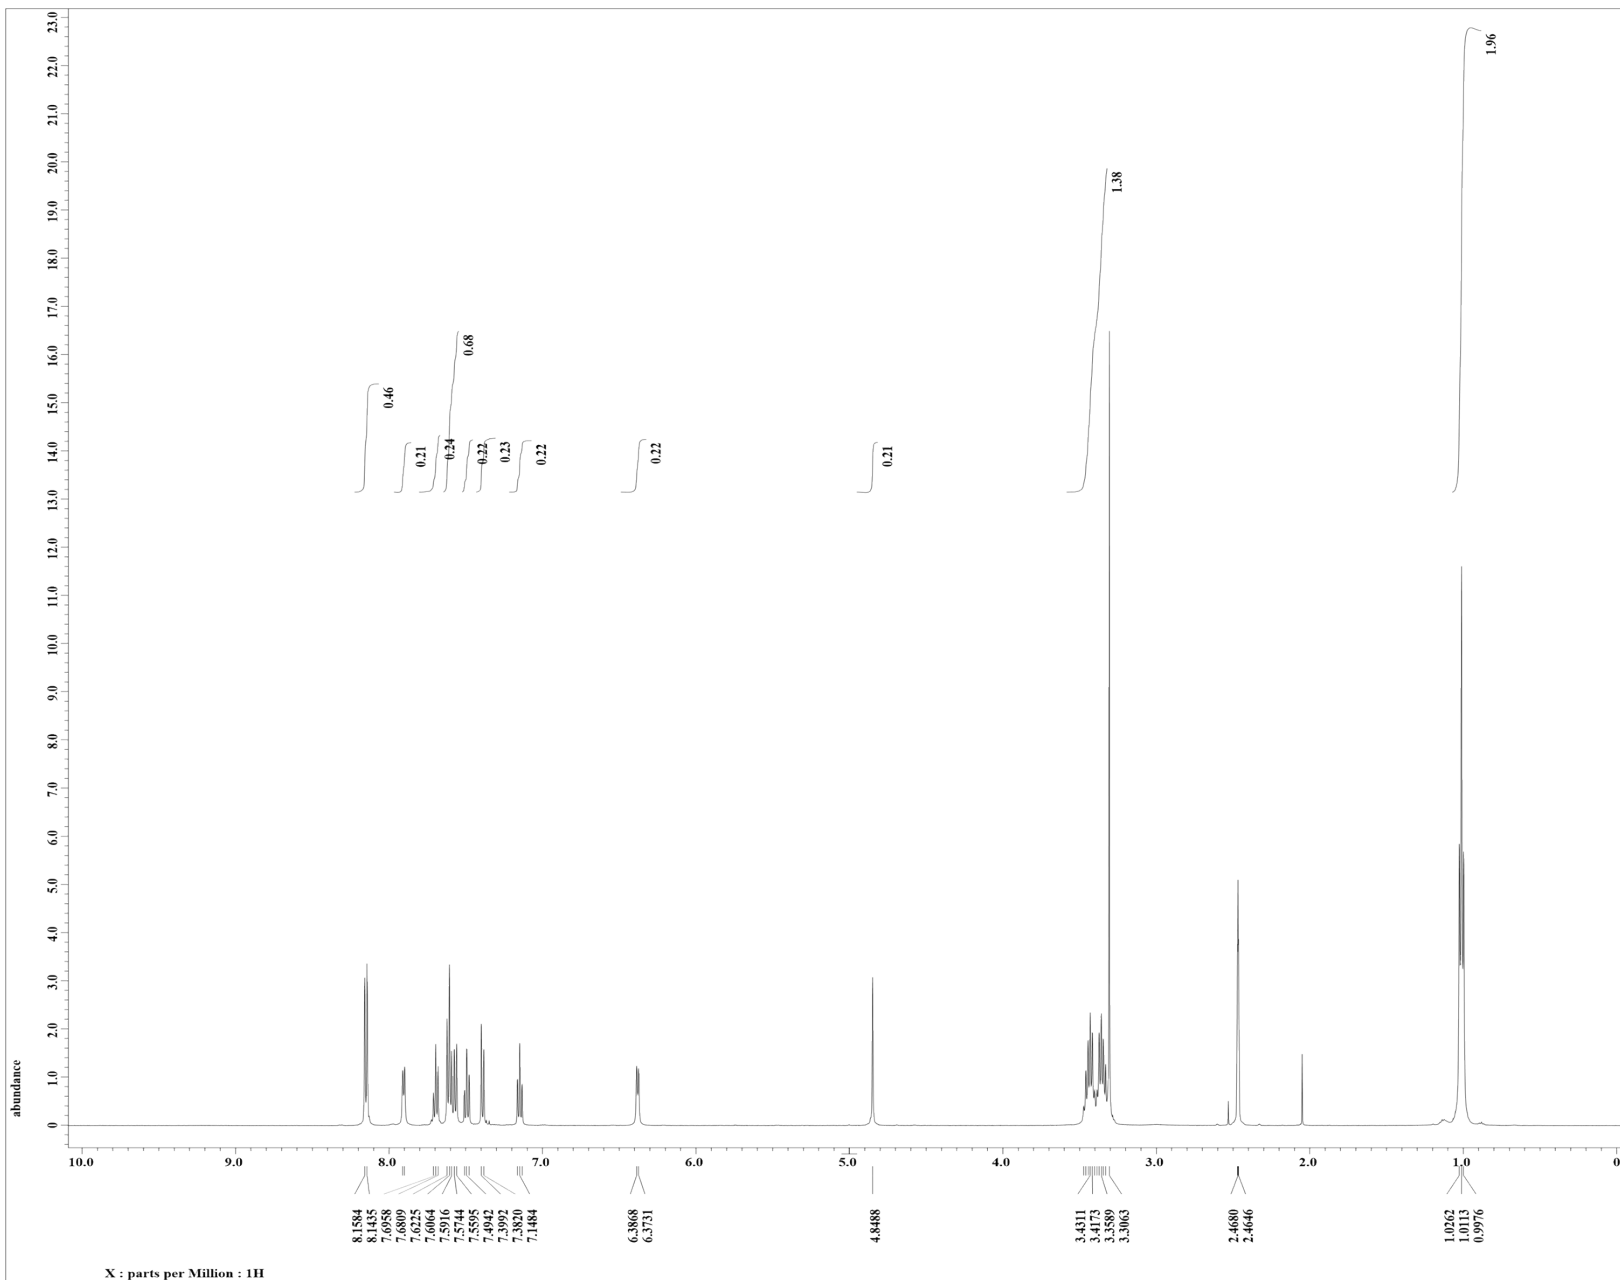



---

----- PROCESSING PARAMETERS -----

dc\_balance : 0 : FALSE  
 secp : 0.2[Hz] : 0.0[s]  
 trapezoid3 : 0[%] : 80[%] : 100[%]  
 zerofill : 1  
 fft : 1 : TRUE : TRUE  
 machinephase  
 ppm

Derived from: TA2020-0414-2.jdf

---

|                  |                         |
|------------------|-------------------------|
| Filename         | = TA2020-0414-5.jdf     |
| Author           | = delta                 |
| Experiment       | = single_pulse.ex2      |
| Sample_id        | = S#378727              |
| Solvent          | = DMSO-d6               |
| Creation_time    | = 30-JUN-2000 12:17:14  |
| Revision_time    | = 14-APR-2020 10:34:41  |
| Current_time     | = 14-APR-2020 10:35:43  |
| Comment          | = Bs-HITAB              |
| Data_format      | = 1D_COMPLEX            |
| Dim_size         | = 13107                 |
| Dim_title        | = 1H                    |
| Dim_units        | = [ppm]                 |
| Dimensions       | = X                     |
| Site             | = ECA500                |
| Spectrometer     | = DELTA2_NMR            |
| Field_strength   | = 11.7473579[T] (500[MH |
| X_acq_duration   | = 1.74587904[s]         |
| X_domain         | = 1H                    |
| X_freq           | = 500.15991521[MHz]     |
| X_offset         | = 5.0[ppm]              |
| X_points         | = 16384                 |
| X_prescans       | = 1                     |
| X_resolution     | = 0.57277737[Hz]        |
| X_sweep          | = 9.38438438[kHz]       |
| Irr_domain       | = 1H                    |
| Irr_freq         | = 500.15991521[MHz]     |
| Irr_offset       | = 5.0[ppm]              |
| Tri_domain       | = 1H                    |
| Tri_freq         | = 500.15991521[MHz]     |
| Tri_offset       | = 5.0[ppm]              |
| Clipped          | = FALSE                 |
| Mod_return       | = 1                     |
| Scans            | = 8                     |
| Total_scans      | = 8                     |
| X_90_width       | = 12[us]                |
| X_acq_time       | = 1.74587904[s]         |
| X_angle          | = 45[deg]               |
| X_atn            | = 3.4[dB]               |
| X_pulse          | = 6[us]                 |
| Irr_mode         | = Off                   |
| Tri_mode         | = Off                   |
| Dante_presat     | = FALSE                 |
| Initial_wait     | = 1[s]                  |
| Recvr_gain       | = 50                    |
| Relaxation_delay | = 5[s]                  |
| Repetition_time  | = 6.74587904[s]         |
| Temp_get         | = 22.6[dc]              |



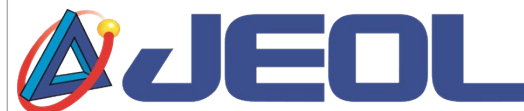

----- PROCESSING PARAMETERS -----  
 do\_balance : 0 : FALSE  
 seRp : 2.0[MHz] : 0.0[s]  
 trapezoid3 : 0[%] : 80[%] : 100[%]  
 zeroFill : 1  
 fft : 1 : TRUE : TRUE  
 machinePhase  
 ppm  
 Derived from: TA200414-1.jdf

Filename = TA200414-2.jdf  
 Author = delta  
 Experiment = single pulse dec  
 Sample\_id = S#867603  
 Solvent = DMSO-D6  
 Creation\_time = 15-APR-2020 07:20:27  
 Revision\_time = 15-APR-2020 07:58:28  
 Current\_time = 15-APR-2020 07:59:51  
 Content = single pulse decouple  
 Data\_format = 1D COMPLEX  
 Dim\_size = 26214  
 Dim\_title = 13C  
 Dim\_units = [ppm]  
 Dimensions = X  
 Site = ECA 500  
 Spectrometer = DELTA2 NMR  
 Field\_strength = 11.62926421[T] (500[M]  
 X\_acq\_duration = 0.8388608[s]  
 X\_domain = 13C  
 X\_freq = 124.5010059[MHz]  
 X\_offset = 100[ppm]  
 X\_points = 32768  
 X\_prescans = 4  
 X\_resolution = 1.1920929[Hz]  
 X\_sweep = 39.0625[kHz]  
 Irf\_domain = 1H  
 Irf\_freq = 495.13191398[MHz]  
 Irf\_offset = 5[ppm]  
 Clipped = FALSE  
 Mod\_return = 1  
 Scans = 20531  
 Total\_scans = 20531  
 X\_90\_width = 10.1[us]  
 X\_acq\_time = 0.8388608[s]  
 X\_angle = 30[deg]  
 X\_atn = 9.5[dB]  
 X\_pulse = 3.36666667[us]  
 Irf\_atn\_dec = 21.51[dB]  
 Irf\_atn\_noe = 21.51[dB]  
 Irf\_noise = WALTZ  
 Decoupling = TRUE  
 Initial\_wait = 1[s]  
 Noe = TRUE  
 Noe\_time = 2[s]  
 Recv\_gain = 60  
 Relaxation\_delay = 2[s]  
 Repetition\_time = 2.8388608[s]  
 Temp\_get = 24.1[dc]

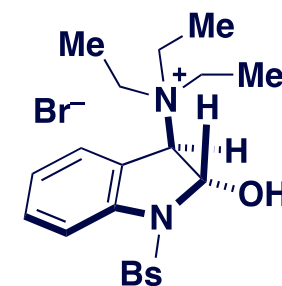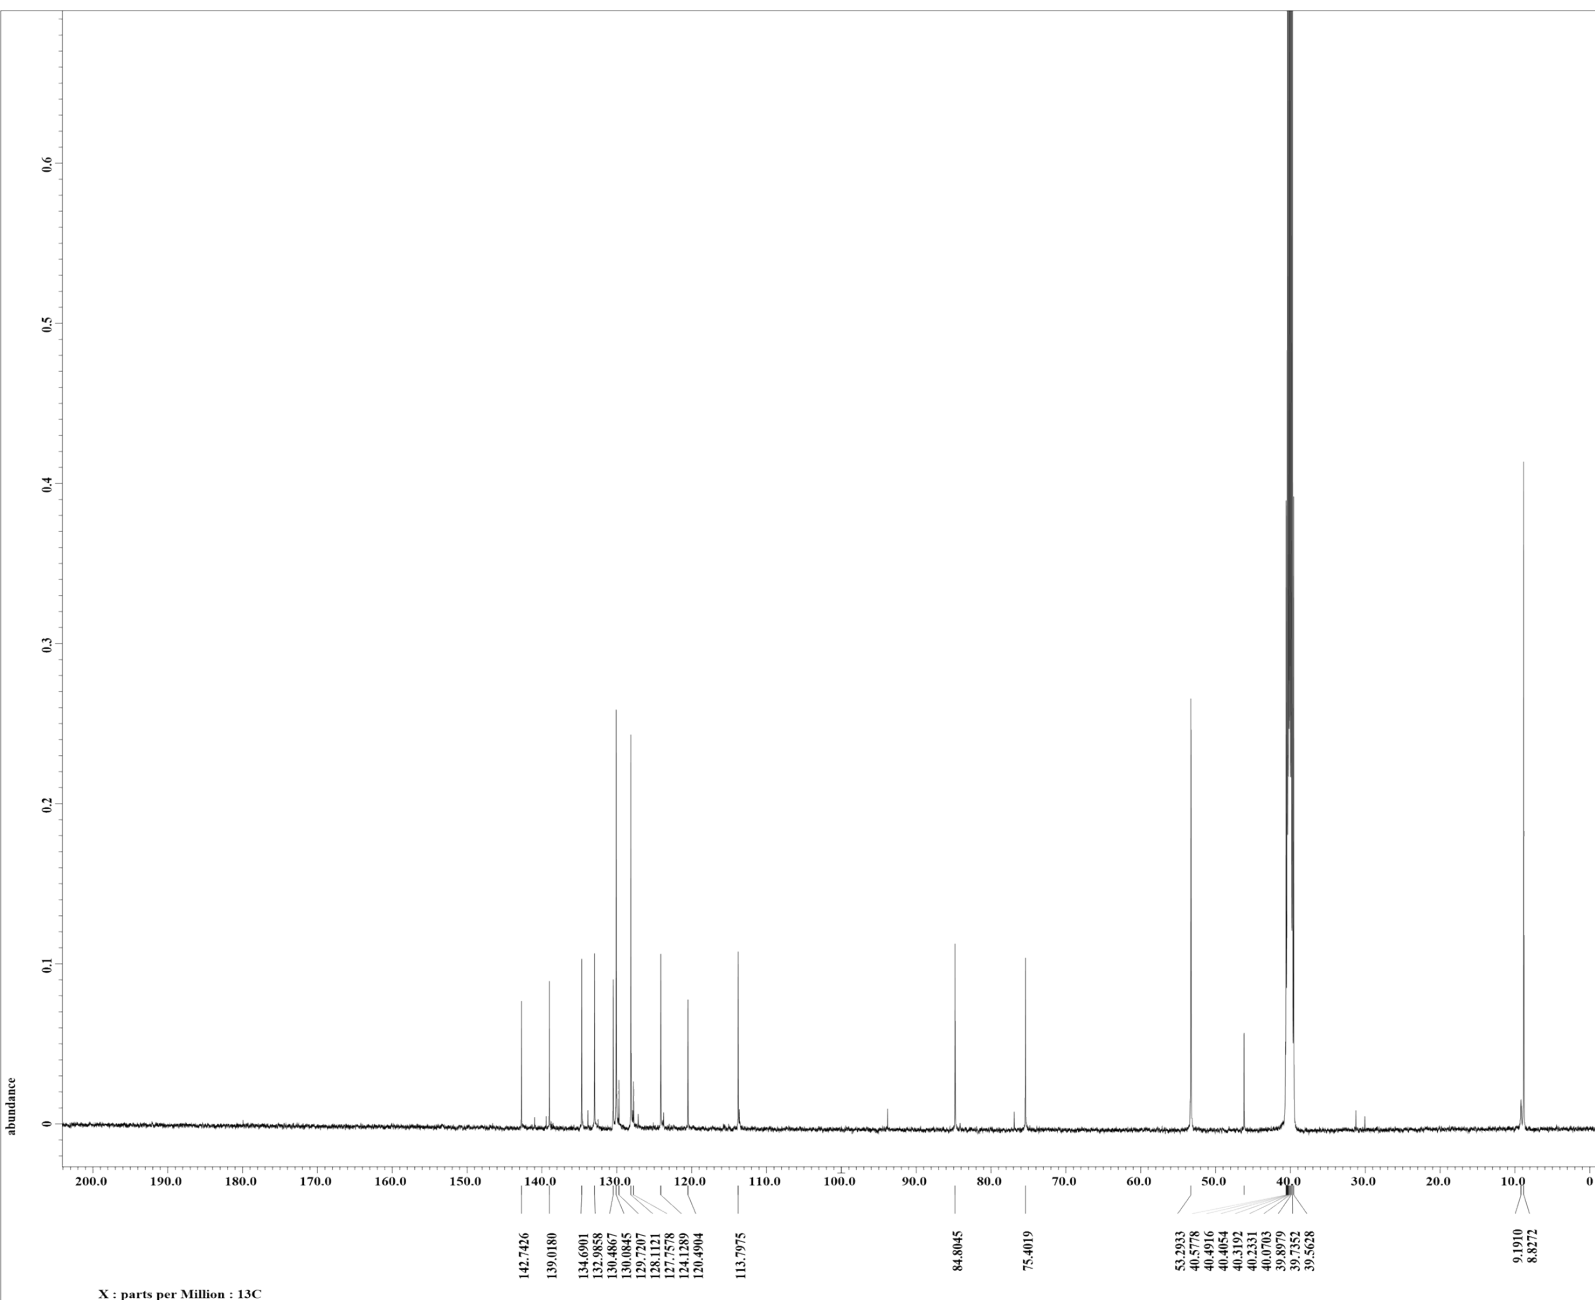

X : parts per Million : 13C

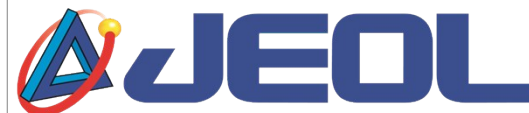

----- PROCESSING PARAMETERS -----  
 dc balance : 0 : FALSE  
 seexp : 0.2[Hz] : 0.0[s]  
 trapezoid3 : 0[%] : 80[%] : 100[%]  
 zerofill : 1  
 fft : 1 : TRUE : TRUE  
 machinephase  
 ppm

Derived from: TA2019-0921-1.jdf

Filename = TA2019-0921-7.jdf  
 Author = delta  
 Experiment = single pulse.ex2  
 Sample\_id = S#626555  
 Solvent = CHLOROFORM-D  
 Creation\_time = 21-SEP-2019 17:16:56  
 Revision\_time = 3-FEB-2020 18:51:21  
 Current\_time = 3-FEB-2020 18:52:40  
 Comment = single pulse  
 Data\_format = 1D COMPLEX  
 Dim\_size = 13107  
 Dim\_title = 1H  
 Dim\_units = [ppm]  
 Dimensions = X  
 Site = ECA500  
 Spectrometer = DELTA2\_NMR  
 Field\_strength = 11.7473579[T] (500[MH  
 X\_acq\_duration = 1.74587904[s]  
 X\_domain = 1H  
 X\_freq = 500.15991521[MHz]  
 X\_offset = 5.0[ppm]  
 X\_points = 16384  
 X\_prescans = 1  
 X\_resolution = 0.57277737[Hz]  
 X\_sweep = 9.38438438[kHz]  
 IPr\_domain = 1H  
 IPr\_freq = 500.15991521[MHz]  
 IPr\_offset = 5.0[ppm]  
 Tri\_domain = 1H  
 Tri\_freq = 500.15991521[MHz]  
 Tri\_offset = 5.0[ppm]  
 Clipped = TRUE  
 Mod\_return = 1  
 Scans = 8  
 Total\_scans = 8  
 X\_90\_width = 12[us]  
 X\_acq\_time = 1.74587904[s]  
 X\_angle = 45[deg]  
 X\_atn = 3.4[dB]  
 X\_pulse = 6[us]  
 IPr\_mode = Off  
 Tri\_mode = Off  
 Dante\_presat = FALSE  
 Initial\_wait = 1[s]  
 Recvr\_gain = 50  
 Relaxation\_delay = 5[s]  
 Repetition\_time = 6.74587904[s]  
 Temp\_get = 22.5[dc]

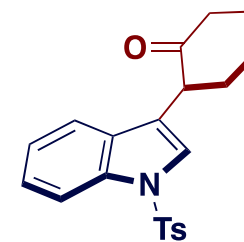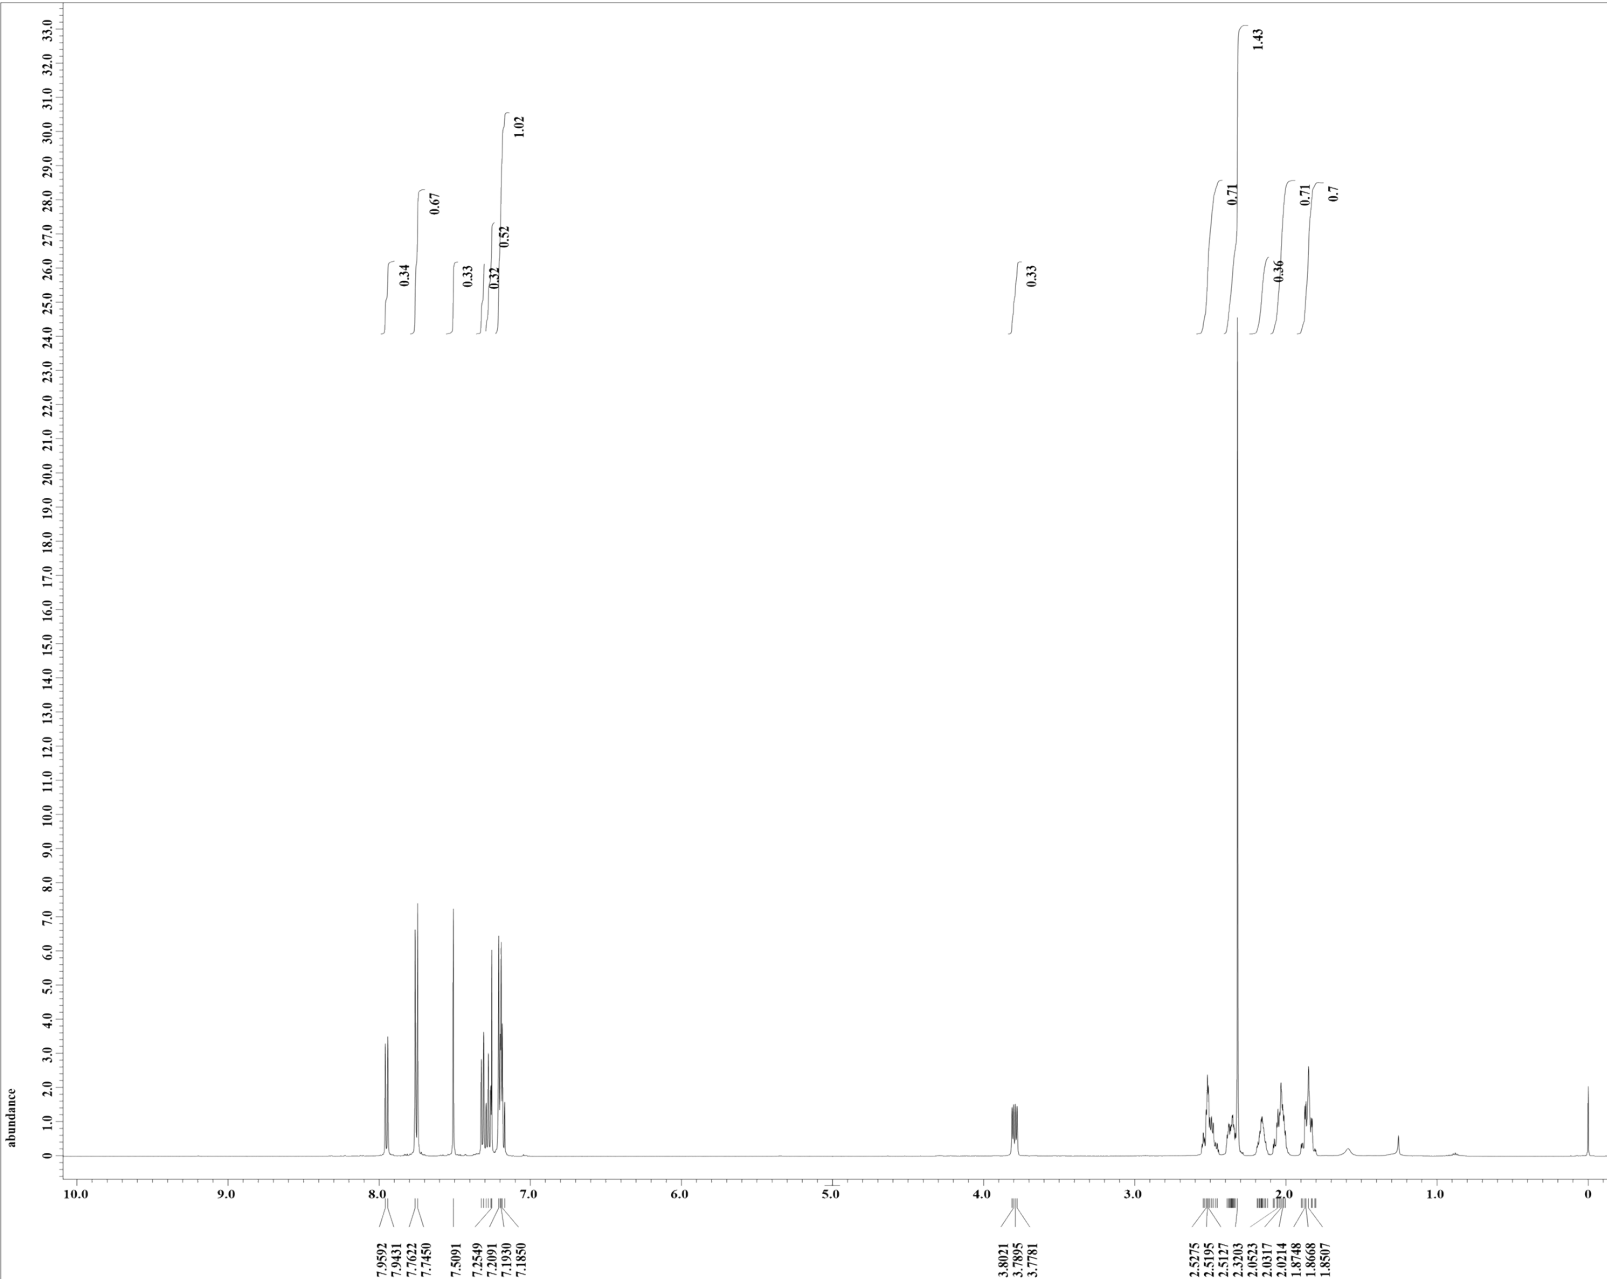

X : parts per Million : 1H

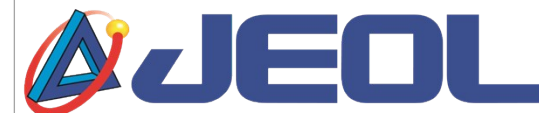

----- PROCESSING PARAMETERS -----  
dc balance : 0 : FALSE  
sexp : 2.0[Hz] : 0.0[s]  
trapezoid3 : 0[%] : 80[%] : 100[%]  
zerofill : 1  
fft : 1 : TRUE : TRUE  
machinphase  
ppm

Derived from: TA2019-0921-2.jdf

Filename = TA2019-0921-6.jdf  
Author = delta  
Experiment = single pulse\_dec  
Sample\_id = S#627576  
Solvent = CHLOROFORM-D  
Creation\_time = 24-SEP-2019 07:43:06  
Revision\_time = 7-MAY-2020 15:26:58  
Current\_time = 7-MAY-2020 15:27:46

Comment = single pulse decouple  
Data\_format = 1D COMPLEX  
Dim\_size = 26214  
Dim\_title = 13C  
Dim\_units = [ppm]  
Dimensions = X  
Site = ECA500  
Spectrometer = DELTA2\_NMR

Field\_strength = 11.7473579[T] (500[MH  
X\_acq\_duration = 0.83361792[s]  
X\_domain = 13C  
X\_freq = 125.76529768[MHz]  
X\_offset = 100[ppm]  
X\_points = 32768  
X\_prescans = 4  
X\_resolution = 1.19959034[Hz]  
X\_sweep = 39.3081761[kHz]  
Irr\_domain = 1H  
Irr\_freq = 500.15991521[MHz]  
Irr\_offset = 5.0[ppm]  
Clipped = FALSE  
Mod\_return = 1  
Scans = 79296  
Total\_scans = 79296

X\_90\_width = 12.8[us]  
X\_acq\_time = 0.83361792[s]  
X\_angle = 30[deg]  
X\_atn = 5.3[dB]  
X\_pulse = 4.26666667[us]  
Irr\_atn\_dec = 21.09[dB]  
Irr\_atn\_noe = 21.09[dB]  
Irr\_noise = WALTZ  
Decoupling = TRUE  
Initial\_wait = 1[s]  
Noe = TRUE  
Noe\_time = 2[s]  
RecVr\_gain = 56  
Relaxation\_delay = 2[s]  
Repetition\_time = 2.83361792[s]  
Temp\_get = 21.4[dc]

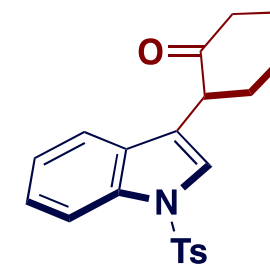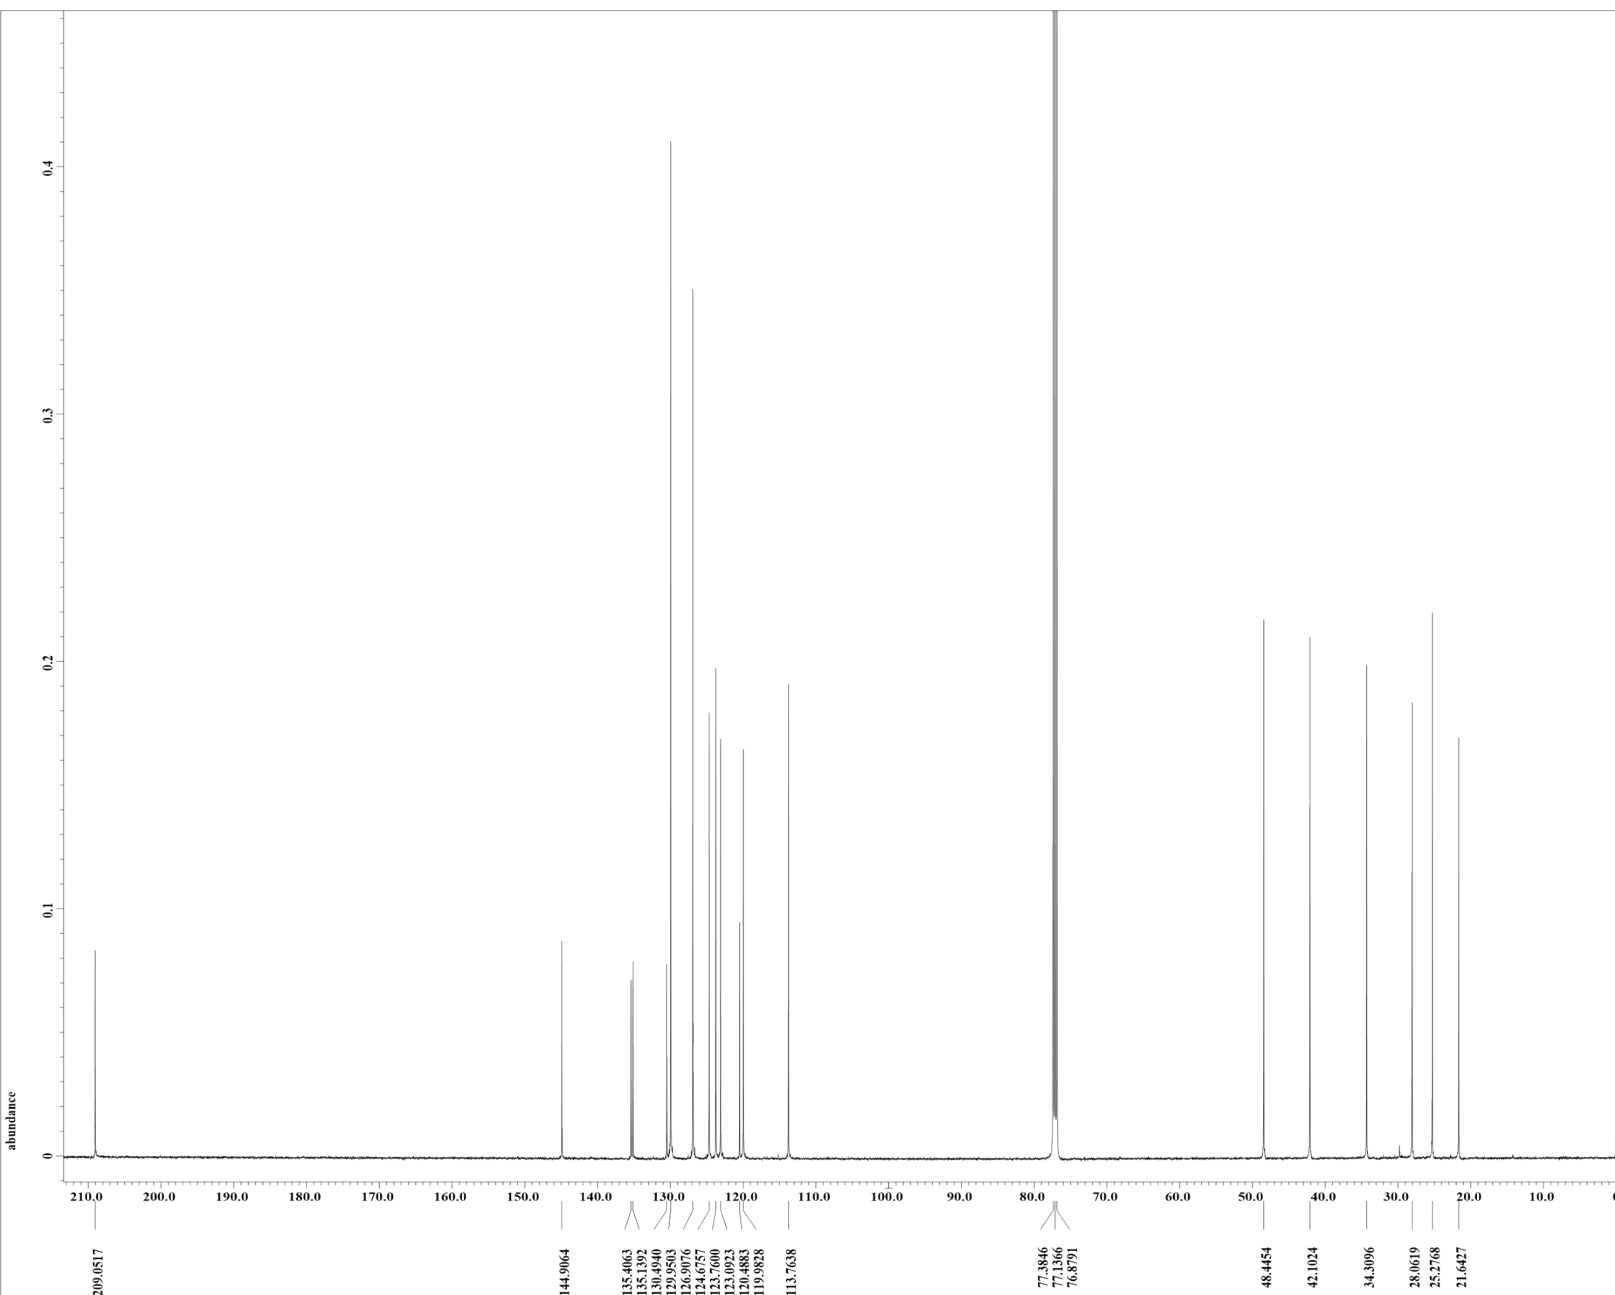





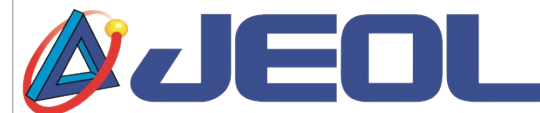

----- PROCESSING PARAMETERS -----  
de\_balance : 0 : FALSE  
seExp : 2.0 [Hz] : 0.0 [s]  
trapezoid3 : 0 [%] : 80 [%] : 100 [%]  
zerofill : 1  
fft : 1 : TRUE : TRUE  
machinephase  
ppm

Filename = TA191015-12.jdf  
Author = delta  
Experiment = single\_pulse\_dec  
Sample\_id = S#684601  
Solvent = CHLOROFORM-D  
Creation\_time = 16-OCT-2019 07:49:31  
Revision\_time = 7-MAY-2020 15:53:18  
Current\_Time = 7-MAY-2020 15:53:59

Comment = single\_pulse\_decouple  
Data\_format = 1D\_COMPLEX  
Dim\_size = 26214  
Dim\_title = 13C  
Dim\_units = [ppm]  
Dimensions = X  
Site = ECA 500  
Spectrometer = DELTA2\_NMR

Field\_strength = 11.62926421 [T] (500[M]  
X\_acq\_duration = 0.8388608 [s]  
X\_domain = 13C  
X\_freq = 124.5010059 [MHz]  
X\_offset = 100 [ppm]  
X\_points = 32768  
X\_prescans = 4  
X\_resolution = 1.1920929 [Hz]  
X\_sweep = 39.0625 [kHz]  
IFr\_domain = 1H  
Irr\_freq = 495.13191398 [MHz]  
Irr\_offset = 5 [ppm]  
Clipped = FALSE  
Mod\_return = 1  
Scans = 17044  
Total\_scans = 17044

X\_90\_width = 10.1 [us]  
X\_acq\_time = 0.8388608 [s]  
X\_angle = 30 [deg]  
X\_atn = 9.5 [dB]  
X\_pulse = 3.36666667 [us]  
Irr\_atn\_dec = 21.51 [dB]  
Irr\_atn\_noe = 21.51 [dB]  
Irr\_noise = WALTZ  
Decoupling = TRUE  
Initial\_wait = 1 [s]  
Noe = TRUE  
Noe\_time = 2 [s]  
Recvr\_gain = 60  
Relaxation\_delay = 2 [s]  
Repetition\_time = 2.8388608 [s]  
Temp\_get = 24.4 [dC]

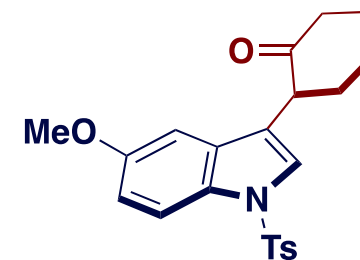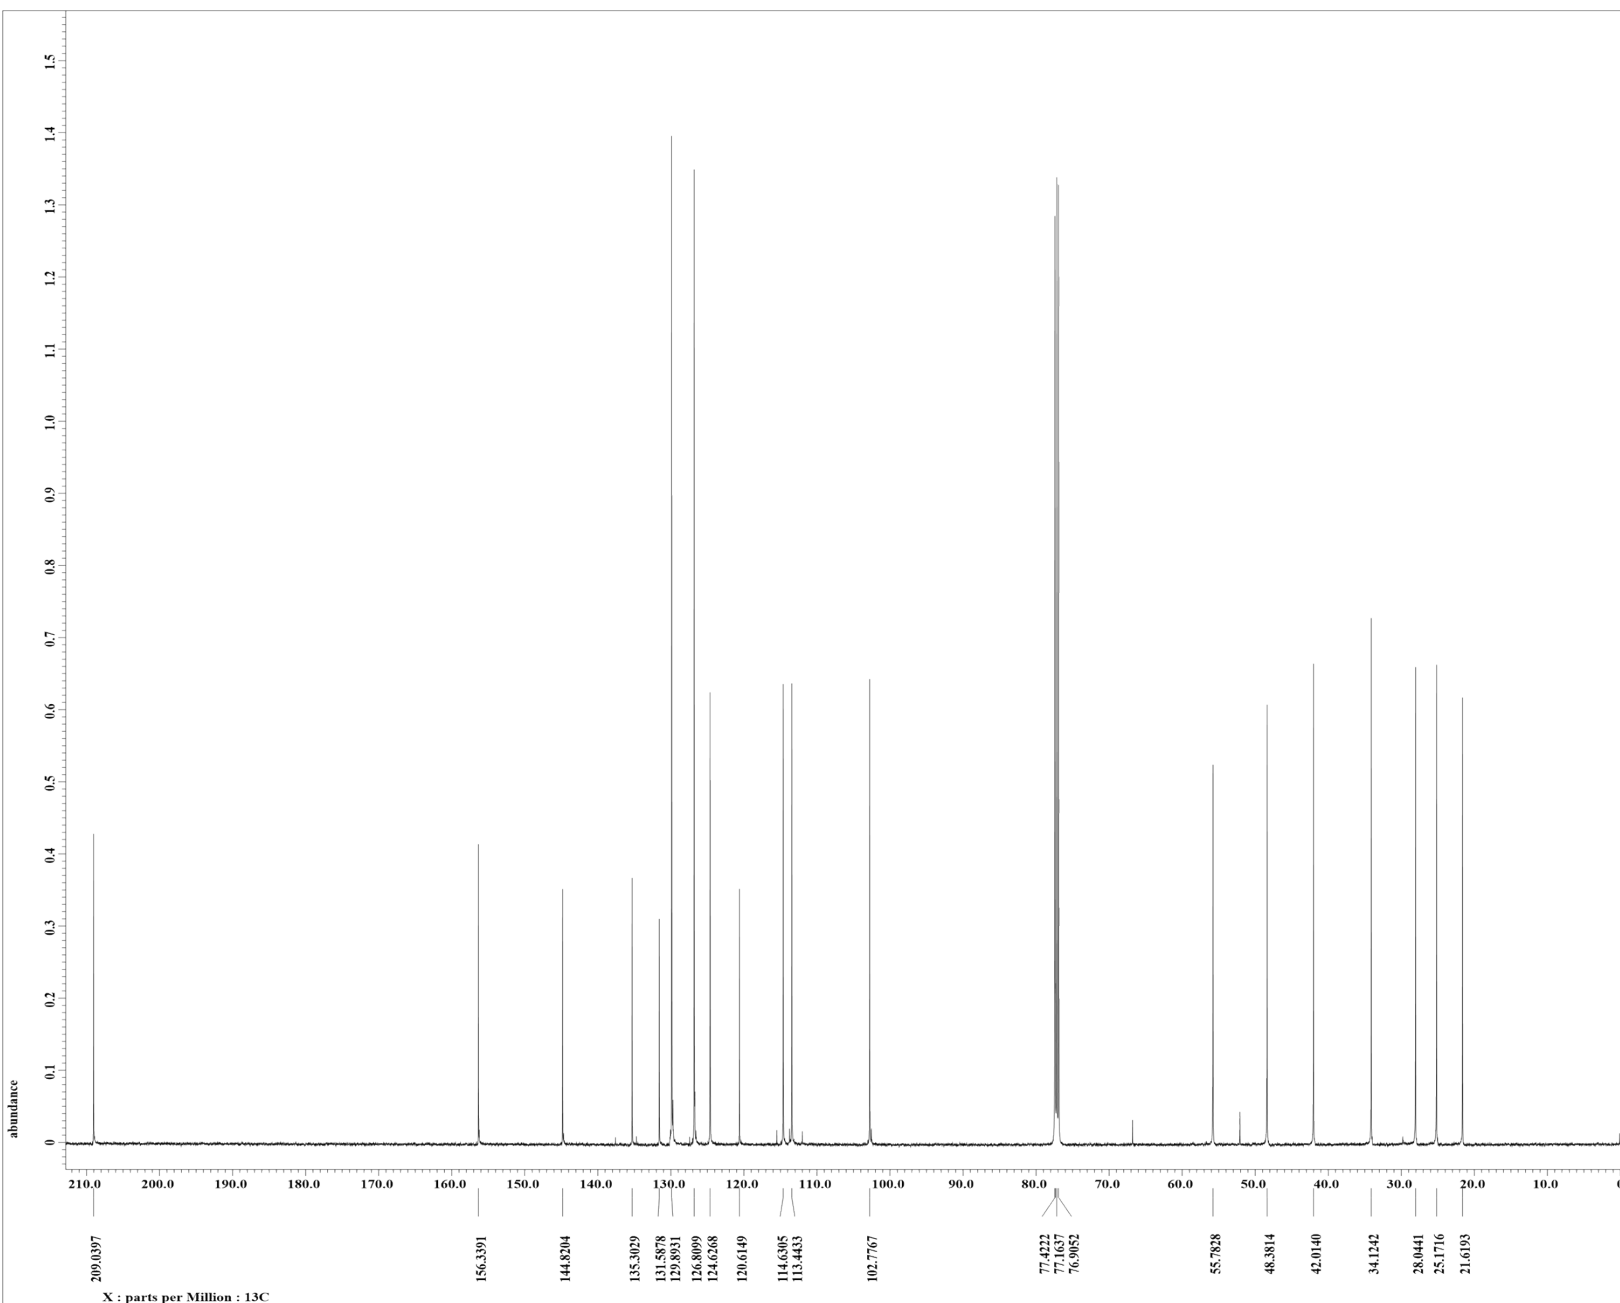

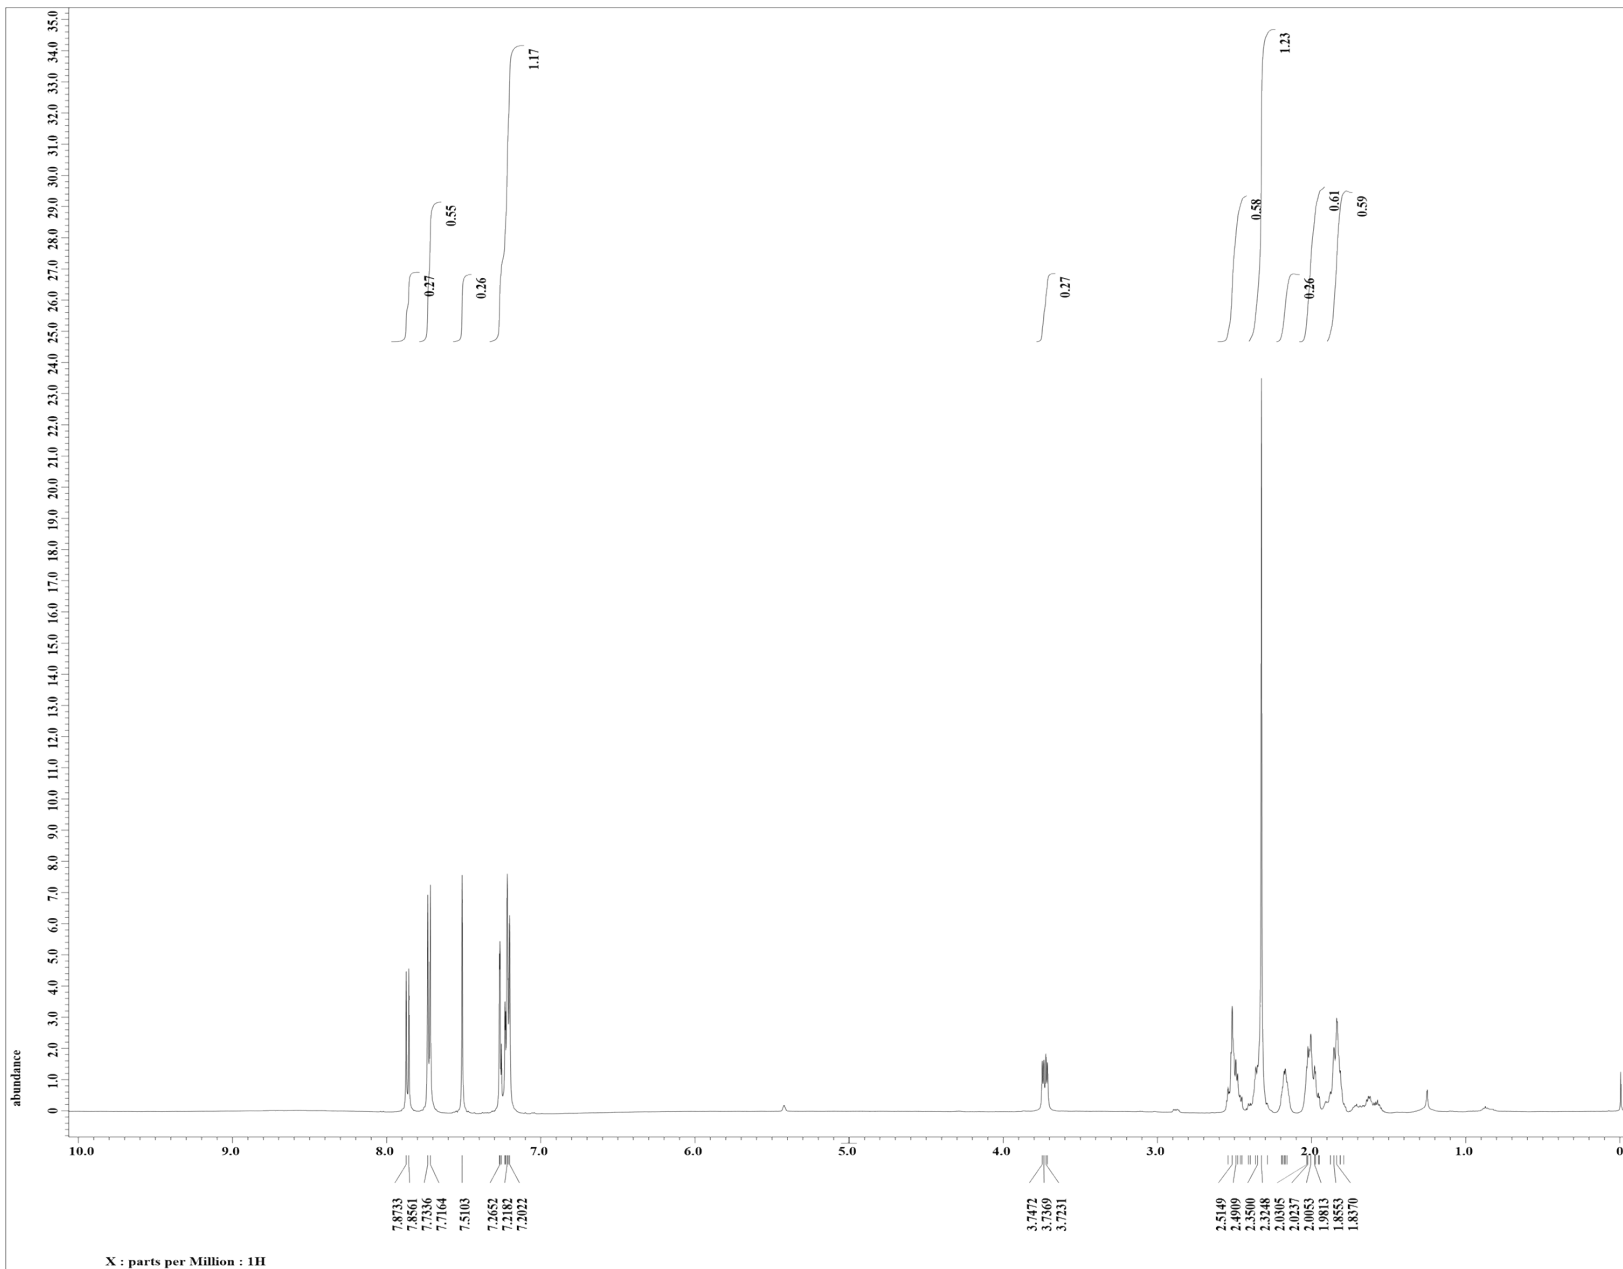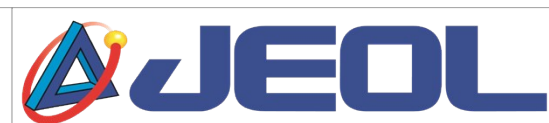

```

---- PROCESSING PARAMETERS ----
do_balance : 0 : FALSE
seXp : 0.2[Hz] : 0.0[s]
trapezoid3 : 0[%] : 80[%] : 100[%]
zerofill : 1
fft : 1 : TRUE : TRUE
machinephase
ppm
Derived from: TA2019-1015-1.jdf

```

```

Filename      = TA2019-1015-11.jdf
Author       = delta
Experiment   = single_pulse.ex2
Sample_id    = S#293072
Solvent      = CHLOROFORM-D
Creation_time = 31-DEC-1999 10:00:37
Revision_time = 7-MAY-2020 12:50:08
Current_time  = 7-MAY-2020 12:50:29

Comment      = single_pulse
Data_format  = 1D_COMPLEX
Dim_size     = 13107
Dim_title    = 1H
Dim_units    = [ppm]
Dimensions   = X
Site         = ECA500
Spectrometer = DELTA2_NMR

Field_strength = 11.7473579[T] (500[MH
X_acq_duration = 1.74587904[s]
X_domain       = 1H
X_freq         = 500.15991521[MHz]
X_offset       = 5.0[ppm]
X_points       = 16384
X_prescans     = 1
X_resolution   = 0.57277737[Hz]
X_sweep        = 9.38438438[kHz]
Irr_domain     = 1H
Irr_freq       = 500.15991521[MHz]
Irr_offset     = 5.0[ppm]
Tri_domain     = 1H
Tri_freq       = 500.15991521[MHz]
Tri_offset     = 5.0[ppm]
Clipped        = TRUE
Mod_return     = 1
Scans          = 8
Total_scans    = 8

X_90_width     = 12[us]
X_acq_time     = 1.74587904[s]
X_angle        = 45[deg]
X_atn          = 3.4[dB]
X_pulse        = 6[us]
Irr_mode       = Off
Tri_mode       = Off
Dante_presat   = FALSE
Initial_wait   = 1[s]
Recvr_gain     = 50
Relaxation_delay = 5[s]
Repetition_time = 6.74587904[s]
Temp_get       = 22.5[dC]

```

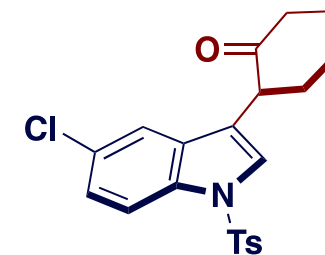

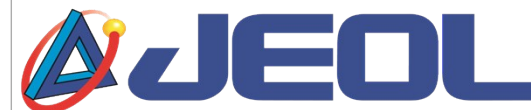

----- PROCESSING PARAMETERS -----  
 dc\_balance : 0 : FALSE  
 secp : 2.0[Hz] : 0.0[s]  
 trapezoid3 : 0[%] : 80[%] : 100[%]  
 zerofill : 1  
 fft : 1 : TRUE : TRUE  
 machinephase  
 ppm  
 Derived from: TA2019-1015-5.jdf

Filename = TA2019-1015-11.jdf  
 Author = delta  
 Experiment = single\_pulse\_dec  
 Sample\_id = S4294065  
 Solvent = CHLOROFORM-D  
 Creation\_time = 31-DEC-1999 12:38:32  
 Revision\_time = 7-MAY-2020 12:46:17  
 Current\_time = 7-MAY-2020 12:46:57  
 Comment = single pulse decouple  
 Data\_format = 1D COMPLEX  
 Dim\_size = 26214  
 Dim\_title = 13C  
 Dim\_units = [ppm]  
 Dimensions = X  
 Site = ECA500  
 Spectrometer = DELTA2\_NMR  
 Field\_strength = 11.7473579[T] (500[MH  
 X\_acq\_duration = 0.83361792[s]  
 X\_domain = 13C  
 X\_freq = 125.76529768[MHz]  
 X\_offset = 100[ppm]  
 X\_points = 32768  
 X\_prescans = 4  
 X\_resolution = 1.19959034[Hz]  
 X\_sweep = 39.3081761[kHz]  
 Irr\_domain = 1H  
 Irr\_freq = 500.15991521[MHz]  
 Irr\_offset = 5.0[ppm]  
 Clipped = FALSE  
 Mod\_return = 1  
 Scans = 3318  
 Total\_scans = 3318  
 X\_90\_width = 12.8[us]  
 X\_acq\_time = 0.83361792[s]  
 X\_angle = 30[deg]  
 X\_atn = 5.3[db]  
 X\_pulse = 4.26666667[us]  
 Irr\_atn\_dec = 21.09[db]  
 Irr\_atn\_noe = 21.09[db]  
 Irr\_noise = WALTZ  
 Decoupling = TRUE  
 Initial\_wait = 1[s]  
 Noe = TRUE  
 Noe\_time = 2[s]  
 Recvr\_gain = 58  
 Relaxation\_delay = 2[s]  
 Repetition\_time = 2.83361792[s]  
 Temp\_get = 23.4[dC]

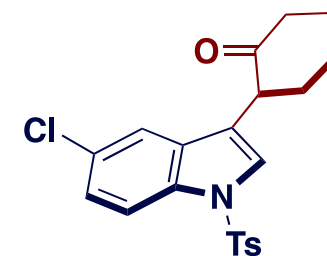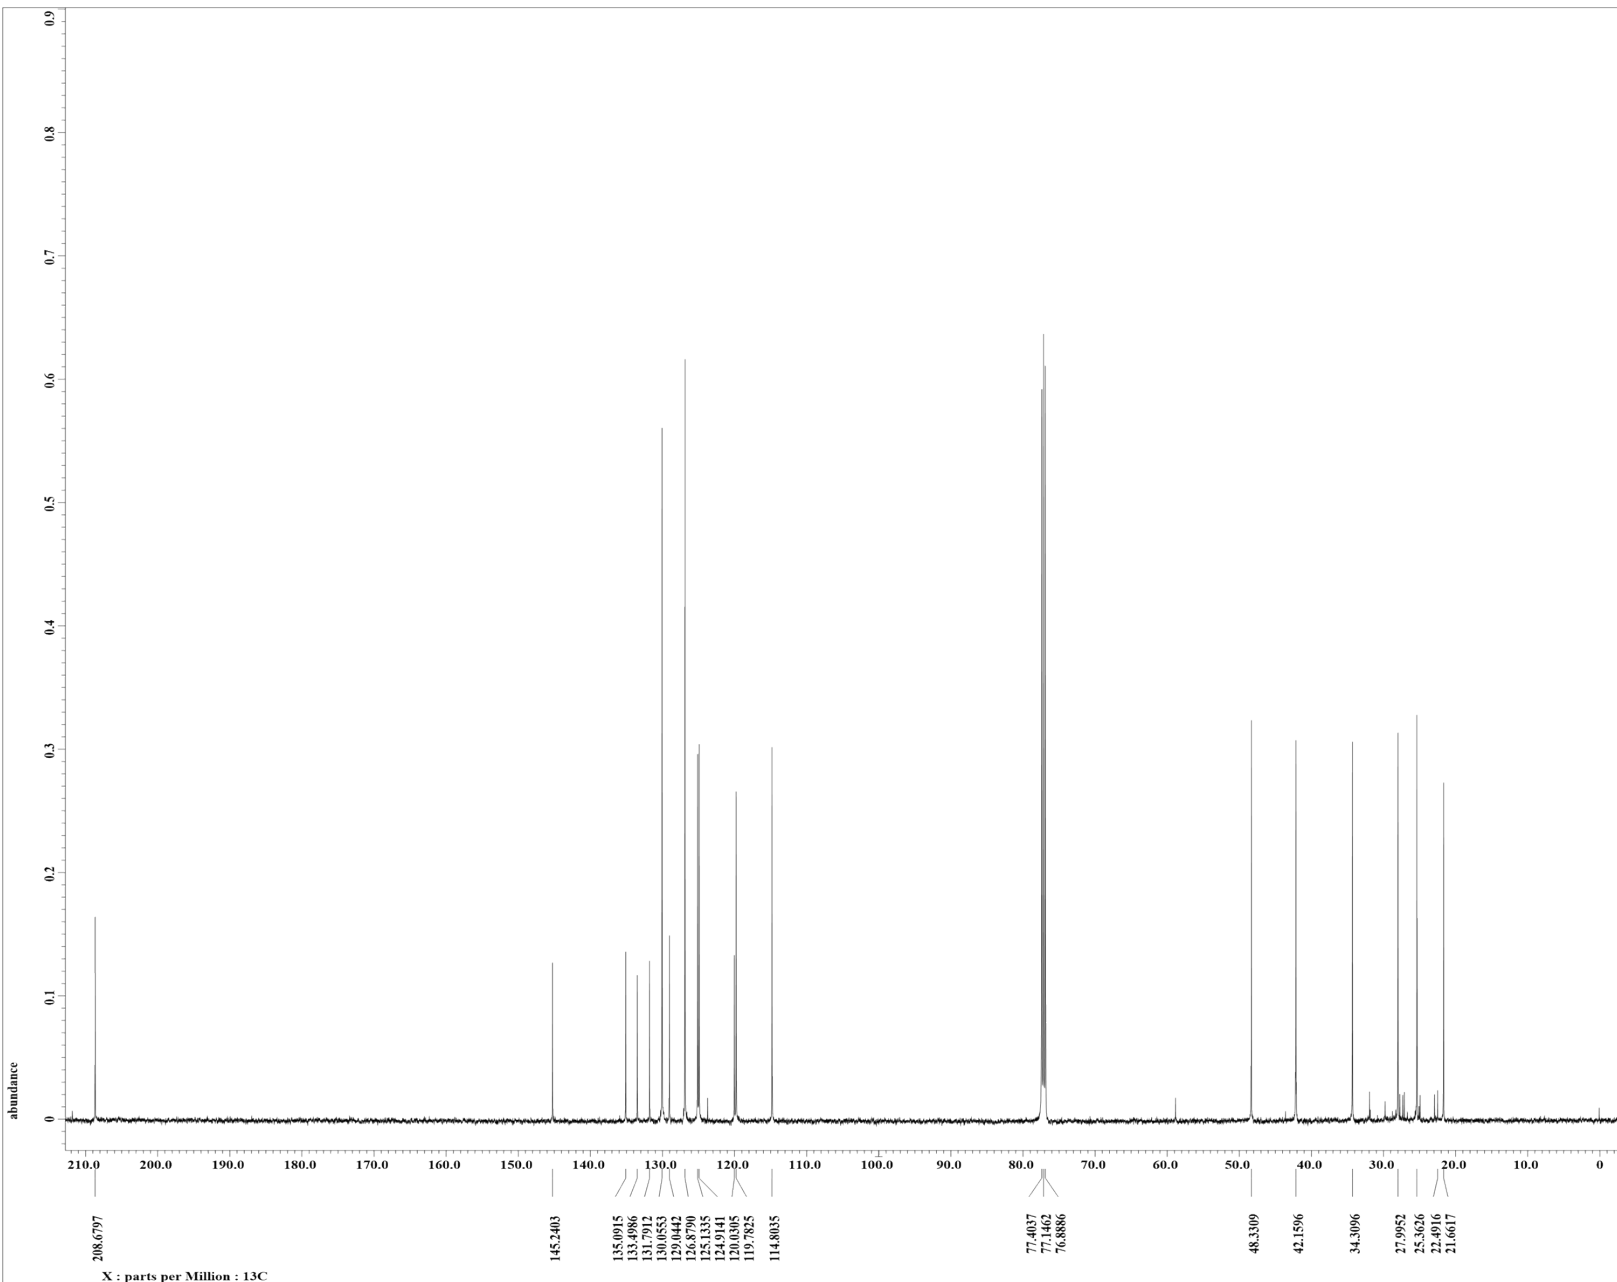

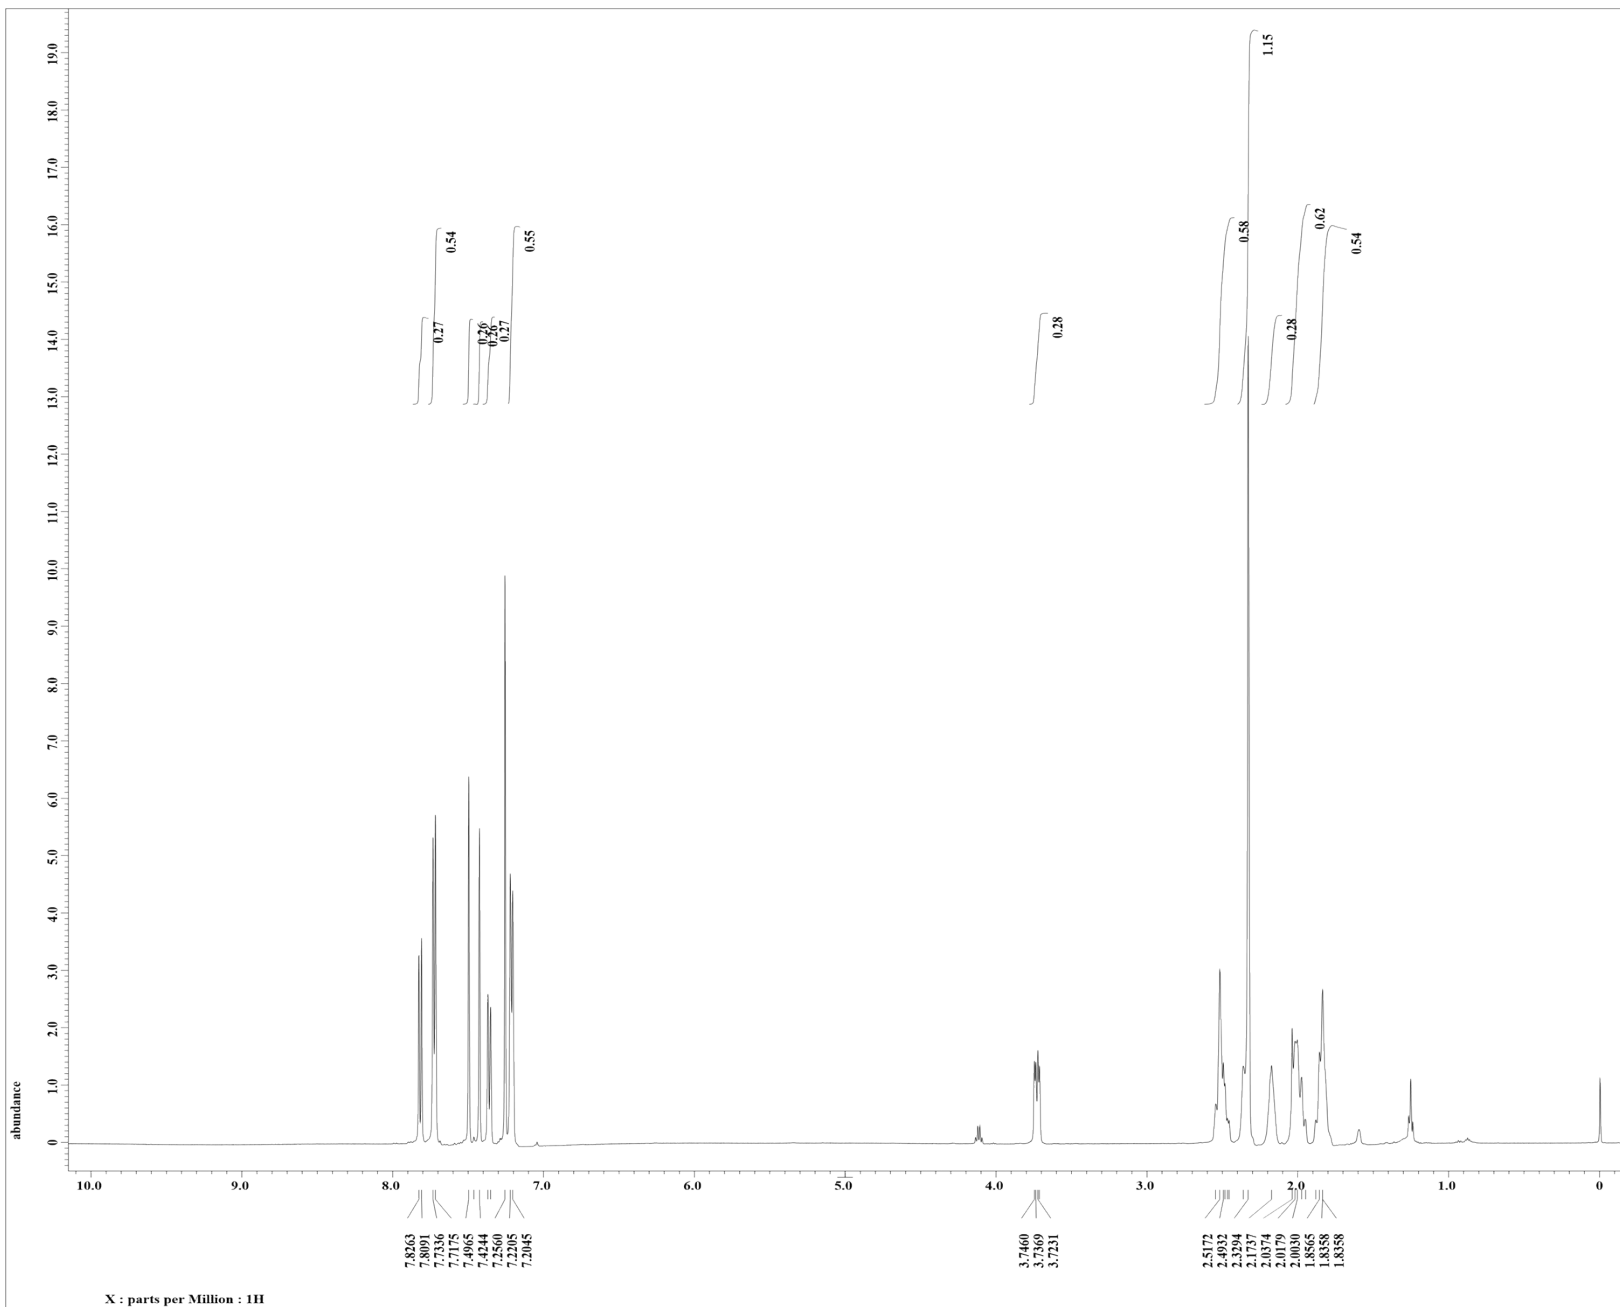



---

----- PROCESSING PARAMETERS -----

dc balance : 0 : FALSE  
 sebp : 0.2[Hz] : 0.0[s]  
 trapzoid3 : 0[%] : 80[%] : 100[%]  
 zerofill : 1  
 fft : 1 : TRUE : TRUE  
 machinephase  
 ppm

Derived from: TA200210-5Br-BF3-2.jdf

---

|                  |                         |
|------------------|-------------------------|
| Filename         | = TA200210-5Br-BF3-5.jd |
| Author           | = delta                 |
| Experiment       | = single_pulse.ex2      |
| Sample_id        | = S8675746              |
| Solvent          | = CHLOROFORM-D          |
| Creation time    | = 28-APR-2000 20:34:21  |
| Revision time    | = 12-FEB-2020 07:56:58  |
| Current_time     | = 12-FEB-2020 07:57:46  |
| Comment          | = single_pulse          |
| Data format      | = 1D COMPLEX            |
| Dim_size         | = 13107                 |
| Dim_title        | = 1H                    |
| Dim_units        | = [ppm]                 |
| Dimensions       | = X                     |
| Site             | = ECA500                |
| Spectrometer     | = DELTA2_NMR            |
| Field_strength   | = 11.7473579[T] (500[MH |
| X_acq_duration   | = 1.74587904[s]         |
| X_domain         | = 1H                    |
| X_freq           | = 500.15991521[MHz]     |
| X_offset         | = 5.0[ppm]              |
| X_points         | = 16384                 |
| X_prescans       | = 1                     |
| X_resolution     | = 0.57277737[Hz]        |
| X_sweep          | = 9.38438438[kHz]       |
| Irr_domain       | = 1H                    |
| Irr_freq         | = 500.15991521[MHz]     |
| Irr_offset       | = 5.0[ppm]              |
| Tri_domain       | = 1H                    |
| Tri_freq         | = 500.15991521[MHz]     |
| Tri_offset       | = 5.0[ppm]              |
| Clipped          | = TRUE                  |
| Mod_return       | = 1                     |
| Scans            | = 8                     |
| Total_scans      | = 8                     |
| X_90_width       | = 12[us]                |
| X_acq_time       | = 1.74587904[s]         |
| X_angle          | = 45[deg]               |
| X_atn            | = 3.4[dB]               |
| X_pulse          | = 6[us]                 |
| Irr_mode         | = Off                   |
| Tri_mode         | = Off                   |
| Dante_presat     | = FALSE                 |
| Initial_wait     | = 1[s]                  |
| Recvr_gain       | = 50                    |
| Relaxation_delay | = 5[s]                  |
| Repetition_time  | = 6.74587904[s]         |
| Temp_get         | = 23[dc]                |





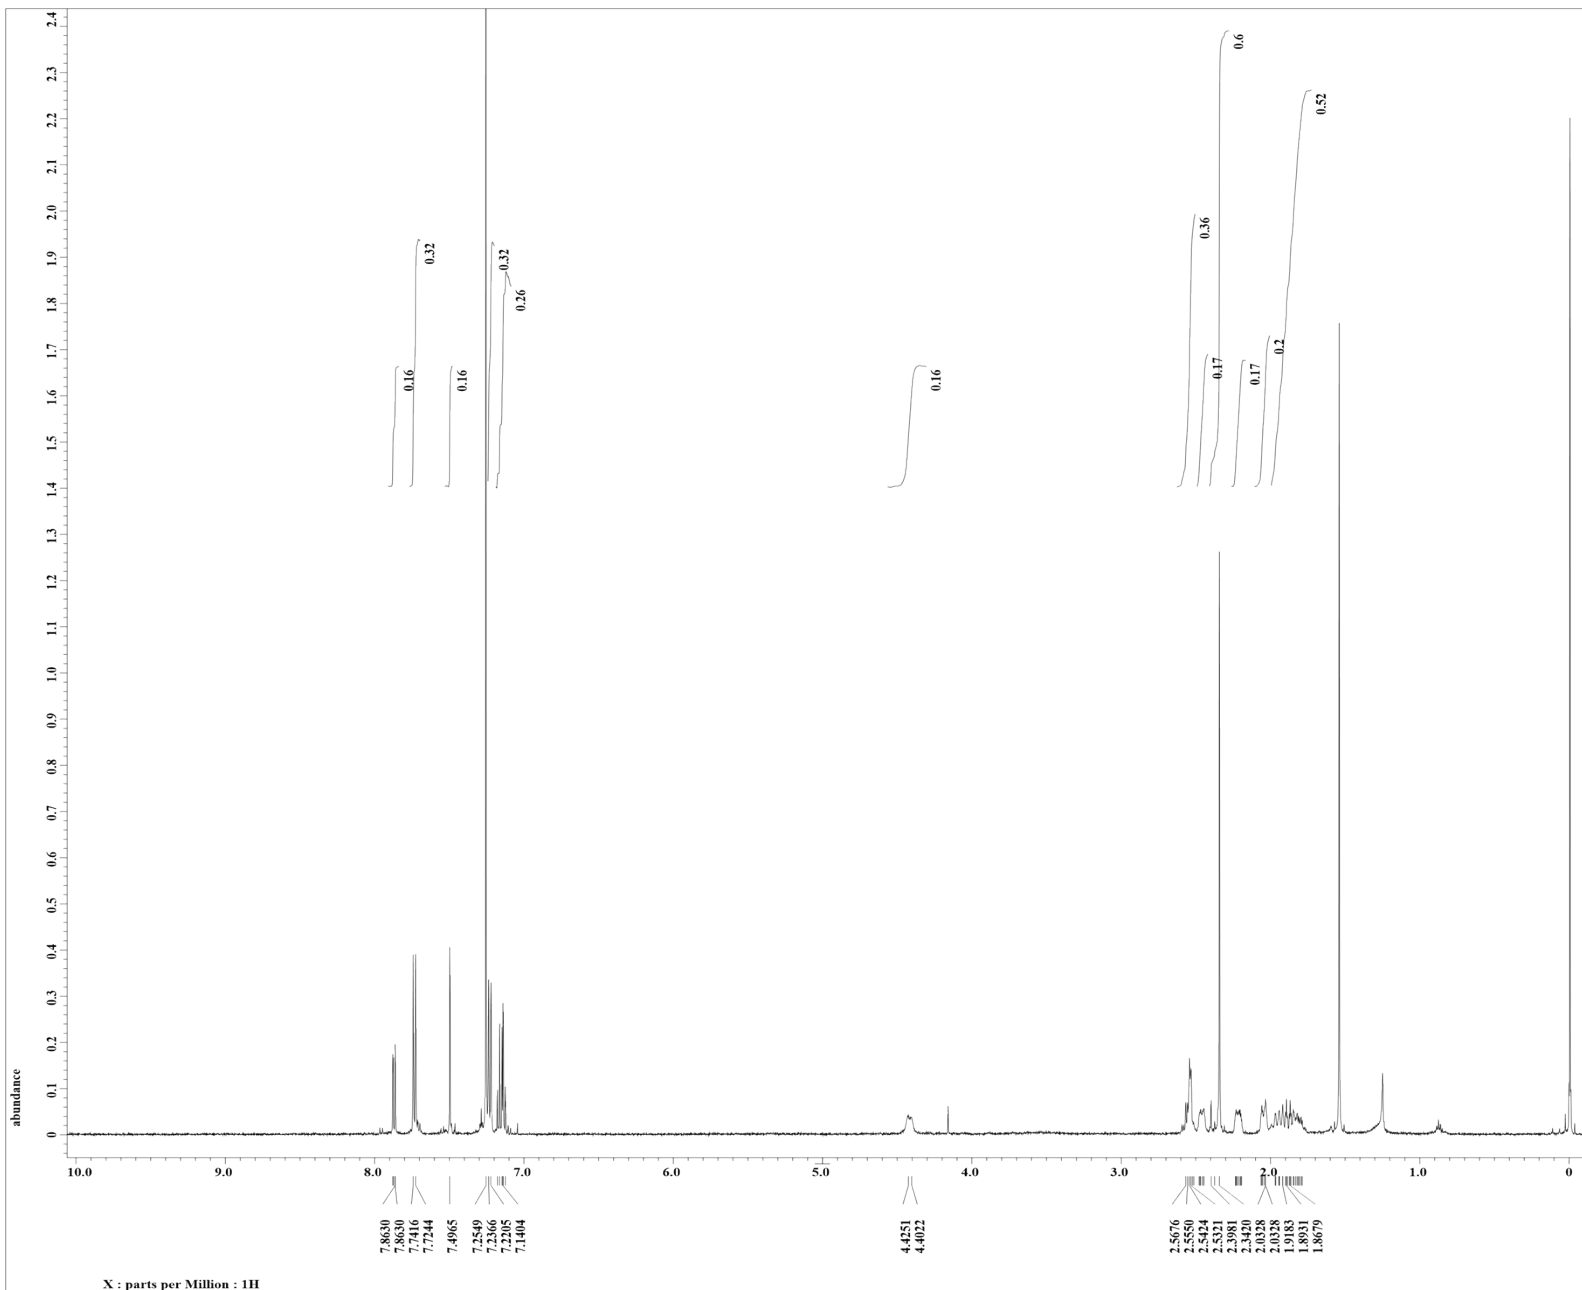

X : parts per Million : 1H

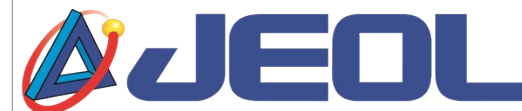

----- PROCESSING PARAMETERS -----  
 dc balance : 0 : FALSE  
 seEp : 0.2[Hz] : 0.0[s]  
 trapezoid3 : 0[%] : 80[%] : 100[%]  
 zeroFill : 1  
 fft : 1 : TRUE : TRUE  
 machinePhase  
 ppm

Derived from: TA200306-4Cl-1.jdf

Filename = TA200306-4Cl-4.jdf  
 Author = delta  
 Experiment = single\_pulse.ex2  
 Sample\_id = S#387368  
 Solvent = CHLOROFORM-D  
 Creation time = 22-MAY-2000 12:32:57  
 Revision time = 6-MAR-2020 10:55:26  
 Current Time = 6-MAR-2020 10:55:44

Comment = 4Cl-cyclohexanone  
 Data format = 1D COMPLEX  
 Dim Size = 13107  
 Dim\_title = 1H  
 Dim\_units = [ppm]  
 Dimensions = X  
 Site = ECA500  
 Spectrometer = DELTA2\_NMR

Field strength = 11.7473579[T] (500[MH  
 X\_acq\_duration = 1.74587904[s]  
 X\_domain = 1H  
 X\_freq = 500.15991521[MHz]  
 X\_offset = 5.0[ppm]  
 X\_points = 16384  
 X\_prescans = 1  
 X\_resolution = 0.57277737[Hz]  
 X\_sweep = 9.38438438[kHz]  
 Irr\_domain = 1H  
 Irr\_freq = 500.15991521[MHz]  
 Irr\_offset = 5.0[ppm]  
 Tri\_domain = 1H  
 Tri\_freq = 500.15991521[MHz]  
 Tri\_offset = 5.0[ppm]  
 Clipped = FALSE  
 Mod\_return = 1  
 Scans = 8  
 Total\_scans = 8

X\_90\_width = 12[us]  
 X\_acq\_time = 1.74587904[s]  
 X\_angle = 45[deg]  
 X\_atn = 3.4[dB]  
 X\_pulse = 6[us]  
 Irr\_mode = Off  
 Tri\_mode = Off  
 Dante\_presat = FALSE  
 Initial\_wait = 1[s]  
 Recvr\_gain = 50  
 Relaxation\_delay = 5[s]  
 Repetition\_time = 6.74587904[s]  
 Temp\_get = 22.2[dc]

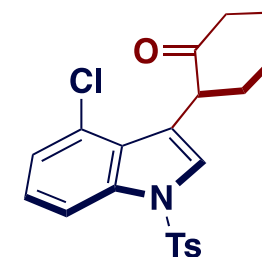

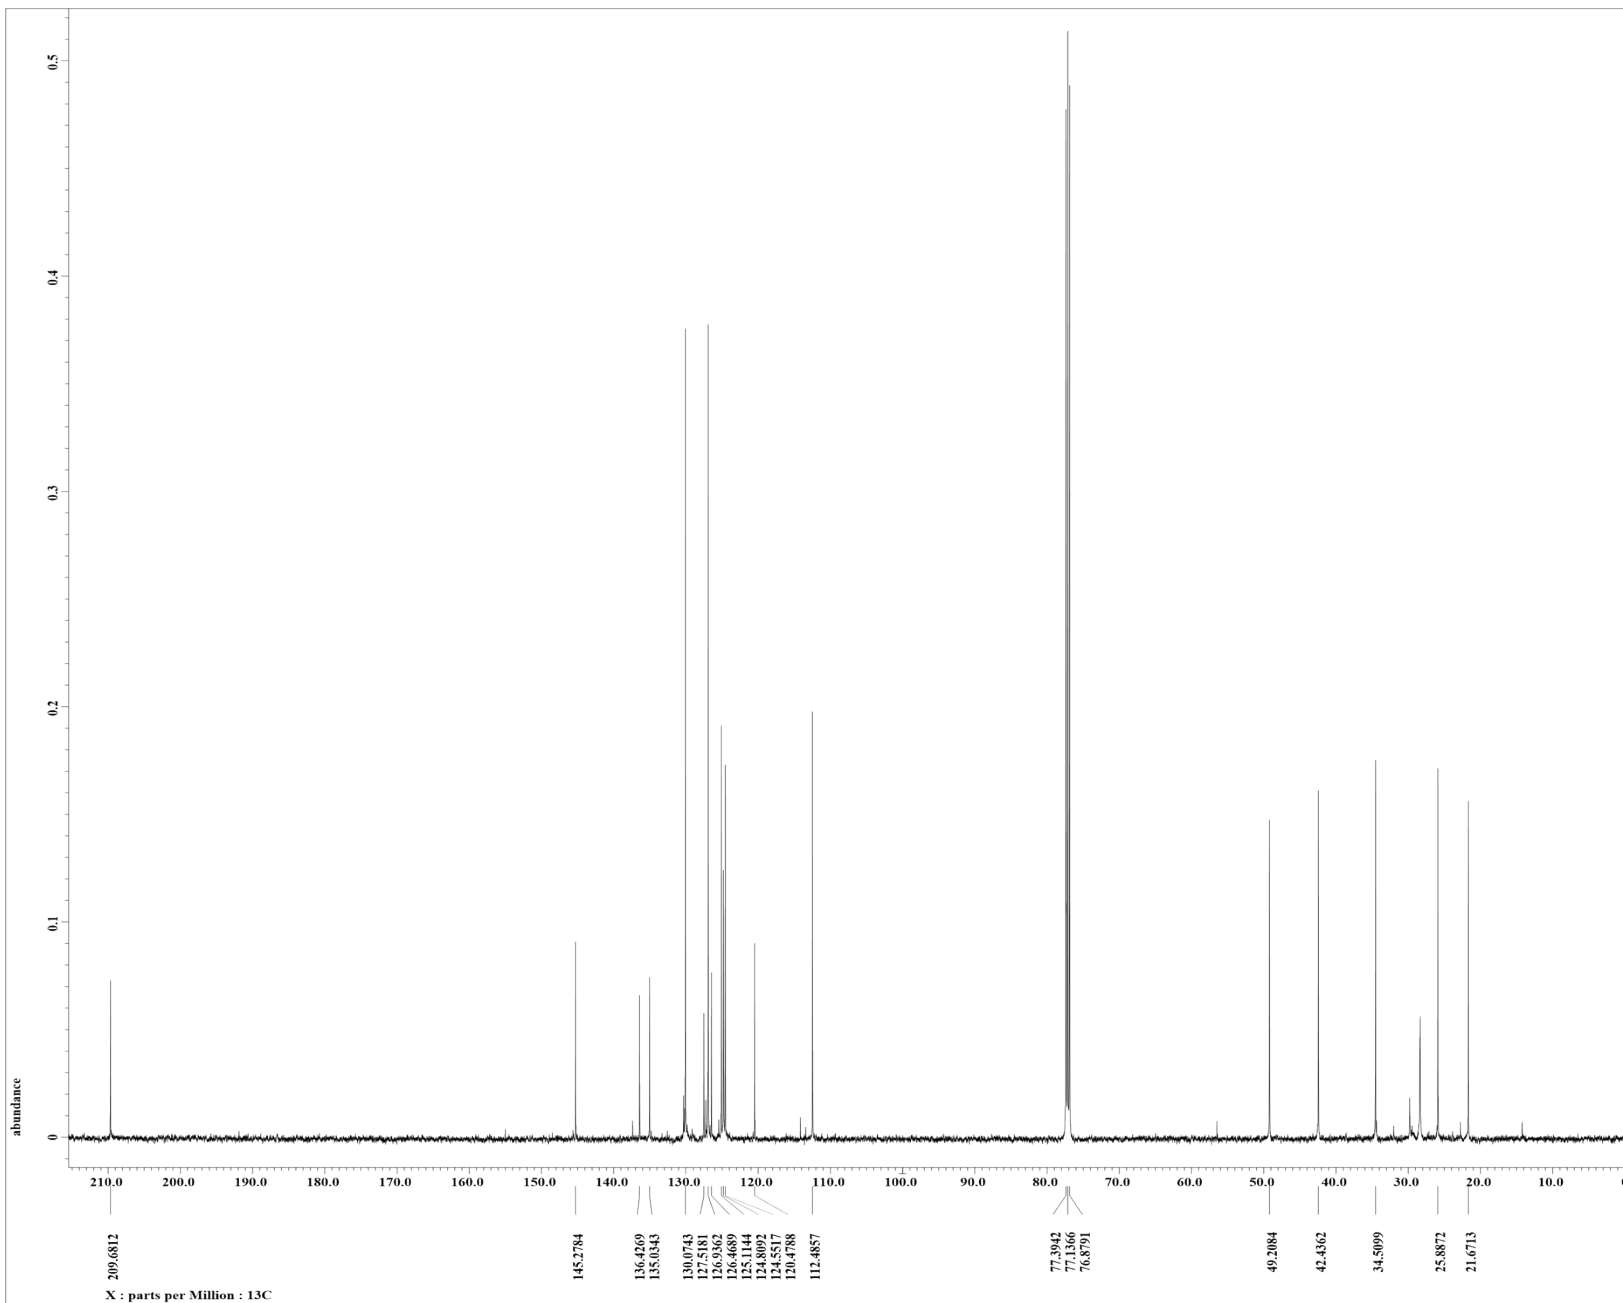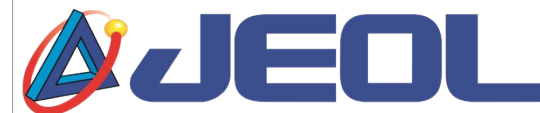

----- PROCESSING PARAMETERS -----  
 dc\_balance : 0 : FALSE  
 seExp : 2.0 [Hz] : 0.0 [s]  
 trapezoid3 : 0 [%] : 80 [%] : 100 [%]  
 zerofill : 1  
 fft : 1 : TRUE : TRUE  
 machinephase  
 ppm  
 Derived from: TA200306-4Cl-2.jdf

Filename = TA200306-4Cl-5.jdf  
 Author = delta  
 Experiment = single pulse\_dec  
 Sample\_id = S#390499  
 Solvent = CHLOROFORM-D  
 Creation\_time = 22-MAY-2000 14:47:07  
 Revision\_time = 6-MAR-2020 13:01:22  
 Current\_time = 6-MAR-2020 13:02:10  
 Comment = 4Cl-cyclohexanone  
 Data\_format = 1D COMPLEX  
 Dim\_size = 26214  
 Dim\_title = 13C  
 Dim\_units = [ppm]  
 Dimensions = X  
 Site = ECA500  
 Spectrometer = DELTA2\_NMR  
 Field\_strength = 11.7473579 [T] (500 [MH  
 X\_acq\_duration = 0.83361792 [s]  
 X\_domain = 13C  
 X\_freq = 125.76529768 [MHz]  
 X\_offset = 100 [ppm]  
 X\_points = 32768  
 X\_prescans = 4  
 X\_resolution = 1.19959034 [Hz]  
 X\_sweep = 39.3081761 [kHz]  
 IFF\_domain = 1H  
 Irr\_freq = 500.15991521 [MHz]  
 Irr\_offset = 5.0 [ppm]  
 Clipped = FALSE  
 Mod\_return = 1  
 Scans = 2738  
 Total\_scans = 2738  
 X\_90\_width = 12.8 [us]  
 X\_acq\_time = 0.83361792 [s]  
 X\_angle = 30 [deg]  
 X\_atn = 5.3 [dB]  
 X\_pulse = 4.266666667 [us]  
 Irr\_atn\_dec = 21.09 [dB]  
 Irr\_atn\_noe = 21.09 [dB]  
 Irr\_noise = WALTZ  
 Decoupling = TRUE  
 Initial\_wait = 1 [s]  
 Noe = TRUE  
 Noe\_time = 2 [s]  
 Recvr\_gain = 54  
 Relaxation\_delay = 2 [s]  
 Repetition\_time = 2.83361792 [s]  
 Temp\_get = 22.8 [dC]

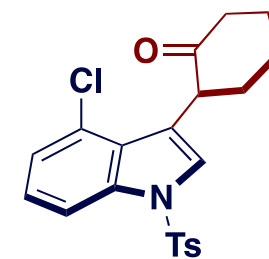



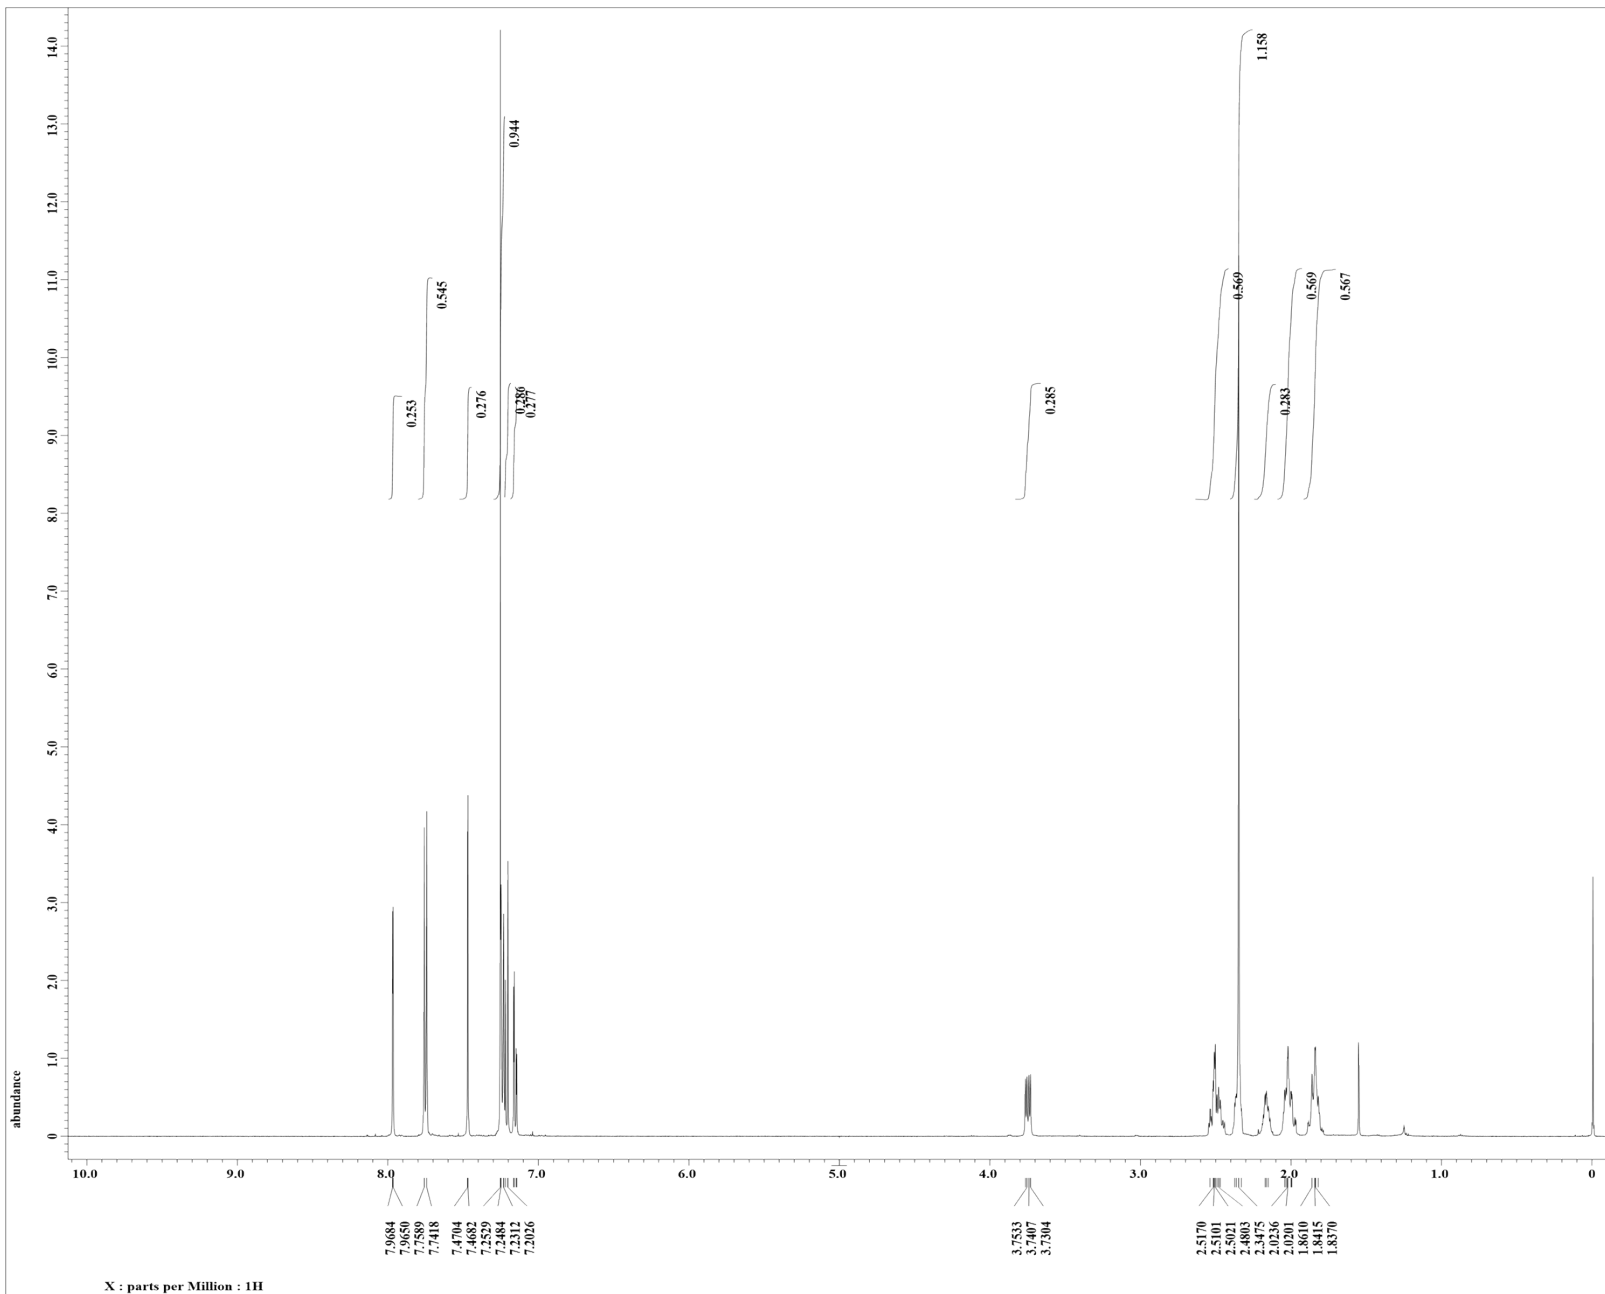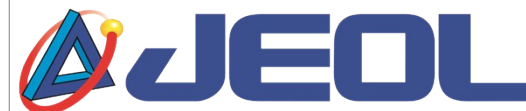

Filename = 6-Cl-Cyclohexanone-1H  
 Author = delta  
 Experiment = single pulse.ex2  
 Sample id = S#597163  
 Solvent = CHLOROFORM-D  
 Creation time = 27-FEB-2020 15:37:29  
 Revision time = 27-FEB-2020 16:40:17  
 Current Time = 27-FEB-2020 16:41:01

Content = single pulse  
 Data format = 1D COMPLEX  
 Dim Size = 13107  
 Dim title = 1H  
 Dim Units = [ppm]  
 Dimensions = X  
 Site = ECA 500  
 Spectrometer = DELTA2\_NMR

Field strength = 11.62926421 [T] (500 [M])  
 X\_acq\_duration = 1.76422912 [s]  
 X\_domain = 1H  
 X\_freq = 495.13191398 [MHz]  
 X\_offset = 5 [ppm]  
 X\_points = 16384  
 X\_prescans = 1  
 X\_resolution = 0.5668198 [Hz]  
 X\_sweep = 9.28677563 [kHz]  
 IRR\_domain = 1H  
 IRR\_freq = 495.13191398 [MHz]  
 IRR\_offset = 5 [ppm]  
 TRI\_domain = 1H  
 TRI\_freq = 495.13191398 [MHz]  
 TRI\_offset = 5 [ppm]  
 Clipped = FALSE  
 Mod\_return = 1  
 Scans = 8  
 Total\_scans = 8

X\_90\_width = 11.3 [us]  
 X\_acq\_time = 1.76422912 [s]  
 X\_angle = 45 [deg]  
 X\_atn = 3.3 [dB]  
 X\_pulse = 5.65 [us]  
 IRR\_mode = Off  
 TRI\_mode = Off  
 DanTe\_preset = FALSE  
 Initial\_wait = 1 [s]  
 Recvr\_gain = 48  
 Relaxation\_delay = 5 [s]  
 Repetition\_time = 6.76422912 [s]  
 Temp\_get = 23.4 [dC]

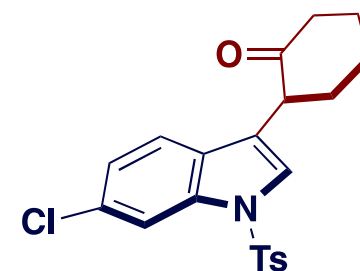

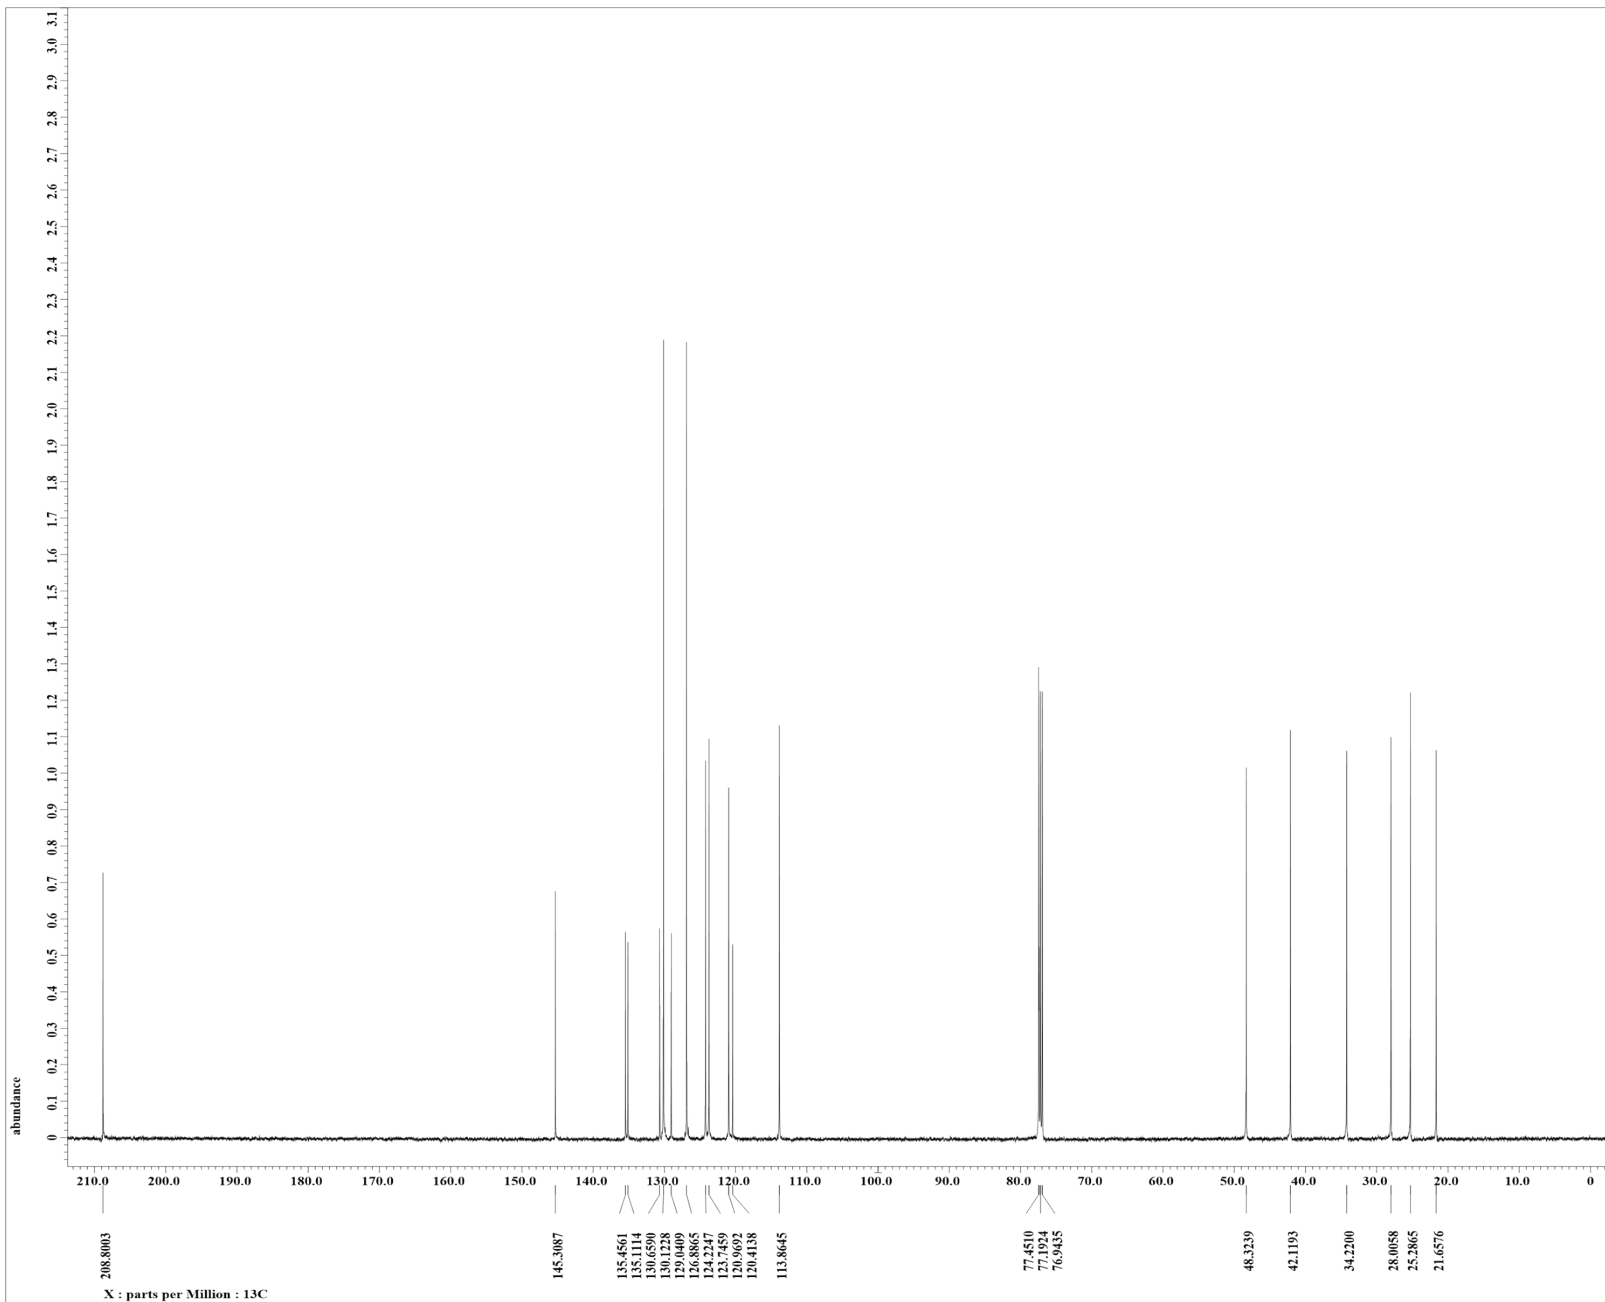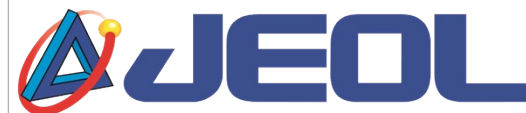

```

Filename      = 6-Cl-Cyclohexanone-13
Author       = delta
Experiment   = single_pulse_dec
Sample_id    = S#603415
Solvent      = CHLOROFORM-D
Creation_time = 27-FEB-2020 17:23:34
Revision_time = 27-FEB-2020 18:23:25
Current_Time  = 27-FEB-2020 18:23:58

Content       = single pulse decouple
Data_format   = 1D COMPLEX
Dim_Size      = 26214
Dim_title     = 13C
Dim_units     = [ppm]
Dimensions    = X
Site          = ECA 500
Spectrometer  = DELTA2_NMR

Field_strength = 11.62926421[T] (500[M]
X_acq_duration = 0.8388608[s]
X_domain       = 13C
X_freq         = 124.5010059[MHz]
X_offset       = 100[ppm]
X_points       = 32768
X_prescans     = 4
X_resolution   = 1.1920929[Hz]
X_sweep        = 39.0625[kHz]
Irr_domain     = 1H
Irr_freq       = 495.13191398[MHz]
Irr_offset     = 5[ppm]
Clipped        = FALSE
Mod_return     = 1
Scans          = 2032
Total_scans    = 2032

X_90_width     = 10.1[us]
X_acq_time     = 0.8388608[s]
X_angle        = 30[deg]
X_atn          = 9.5[dB]
X_pulse        = 3.36666667[us]
Irr_atn_dec    = 21.51[dB]
Irr_atn_noe    = 21.51[dB]
Irr_noise      = WALTZ
Decoupling     = TRUE
Initial_wait   = 1[s]
Noe            = TRUE
Noe_time       = 2[s]
Recvr_gain     = 60
Relaxation_delay = 2[s]
Repetition_time = 2.8388608[s]
Temp_get       = 24.1[dc]
  
```

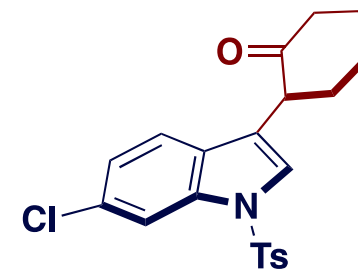

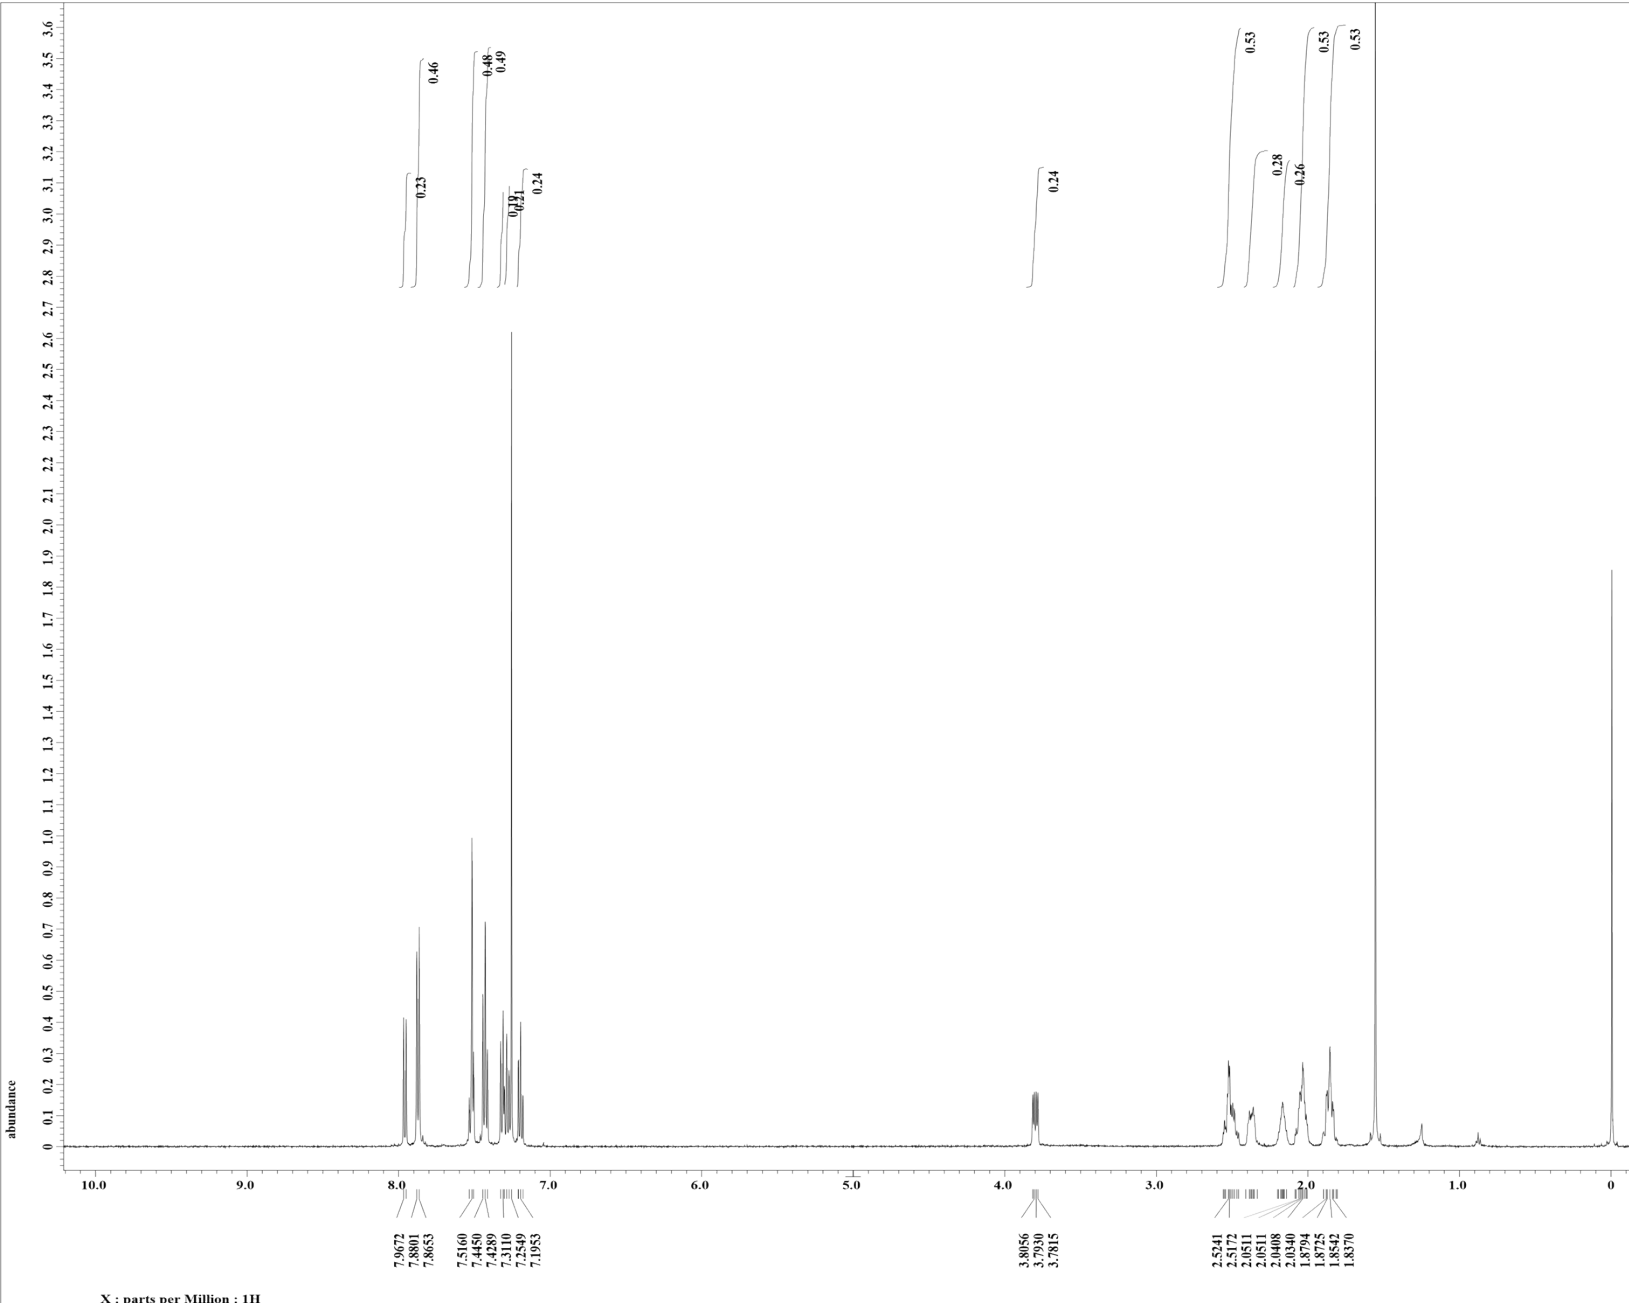

X : parts per Million : 1H

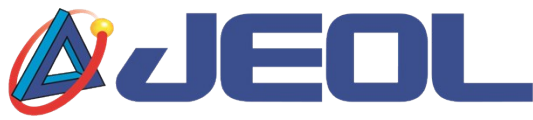

----- PROCESSING PARAMETERS -----  
dc balance : 0 : FALSE  
sexp : 0.2 [Hz] : 0.0 [s]  
trapezoid3 : 0 [%] : 80 [%] : 100 [%]  
zerofill : 1  
fft : 1 : TRUE : TRUE  
machinephase  
ppm  
Derived from: TA200515-2-1.jdf

Filename = TA200515-2-4.jdf  
Author = delta  
Experiment = single pulse.ex2  
Sample\_id = S#612538  
Solvent = CHLOROFORM-D  
Creation\_time = 31-JUL-2000 18:45:50  
Revision\_time = 15-MAY-2020 17:07:30  
Current\_time = 15-MAY-2020 17:07:51  
  
Comment = single pulse  
Data\_format = 1D COMPLEX  
Dim\_size = 13107  
Dim\_title = 1H  
Dim\_units = [ppm]  
Dimensions = X  
Site = ECA500  
Spectrometer = DELTA2\_NMR  
  
Field\_strength = 11.7473579 [T] (500 [MH  
X\_acq\_duration = 1.74587904 [s]  
X\_domain = 1H  
X\_freq = 500.15991521 [MHz]  
X\_offset = 5.0 [ppm]  
X\_points = 16384  
X\_prescans = 1  
X\_resolution = 0.57277737 [Hz]  
X\_sweep = 9.38438438 [kHz]  
Irr\_domain = 1H  
Irr\_freq = 500.15991521 [MHz]  
Irr\_offset = 5.0 [ppm]  
Tri\_domain = 1H  
Tri\_freq = 500.15991521 [MHz]  
Tri\_offset = 5.0 [ppm]  
Clipped = FALSE  
Mod\_return = 1  
Scans = 8  
Total\_scans = 8  
  
X\_90\_width = 12 [us]  
X\_acq\_time = 1.74587904 [s]  
X\_angle = 45 [deg]  
X\_atn = 3.4 [dB]  
X\_pulse = 6 [us]  
Irr\_mode = Off  
Tri\_mode = Off  
Dante\_presat = FALSE  
Initial\_wait = 1 [s]  
Recvr\_gain = 50  
Relaxation\_delay = 5 [s]  
Repetition\_time = 6.74587904 [s]  
Temp\_get = 21.8 [dc]

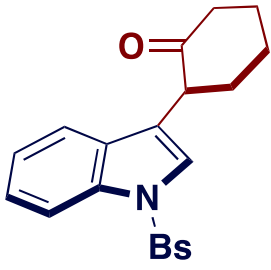

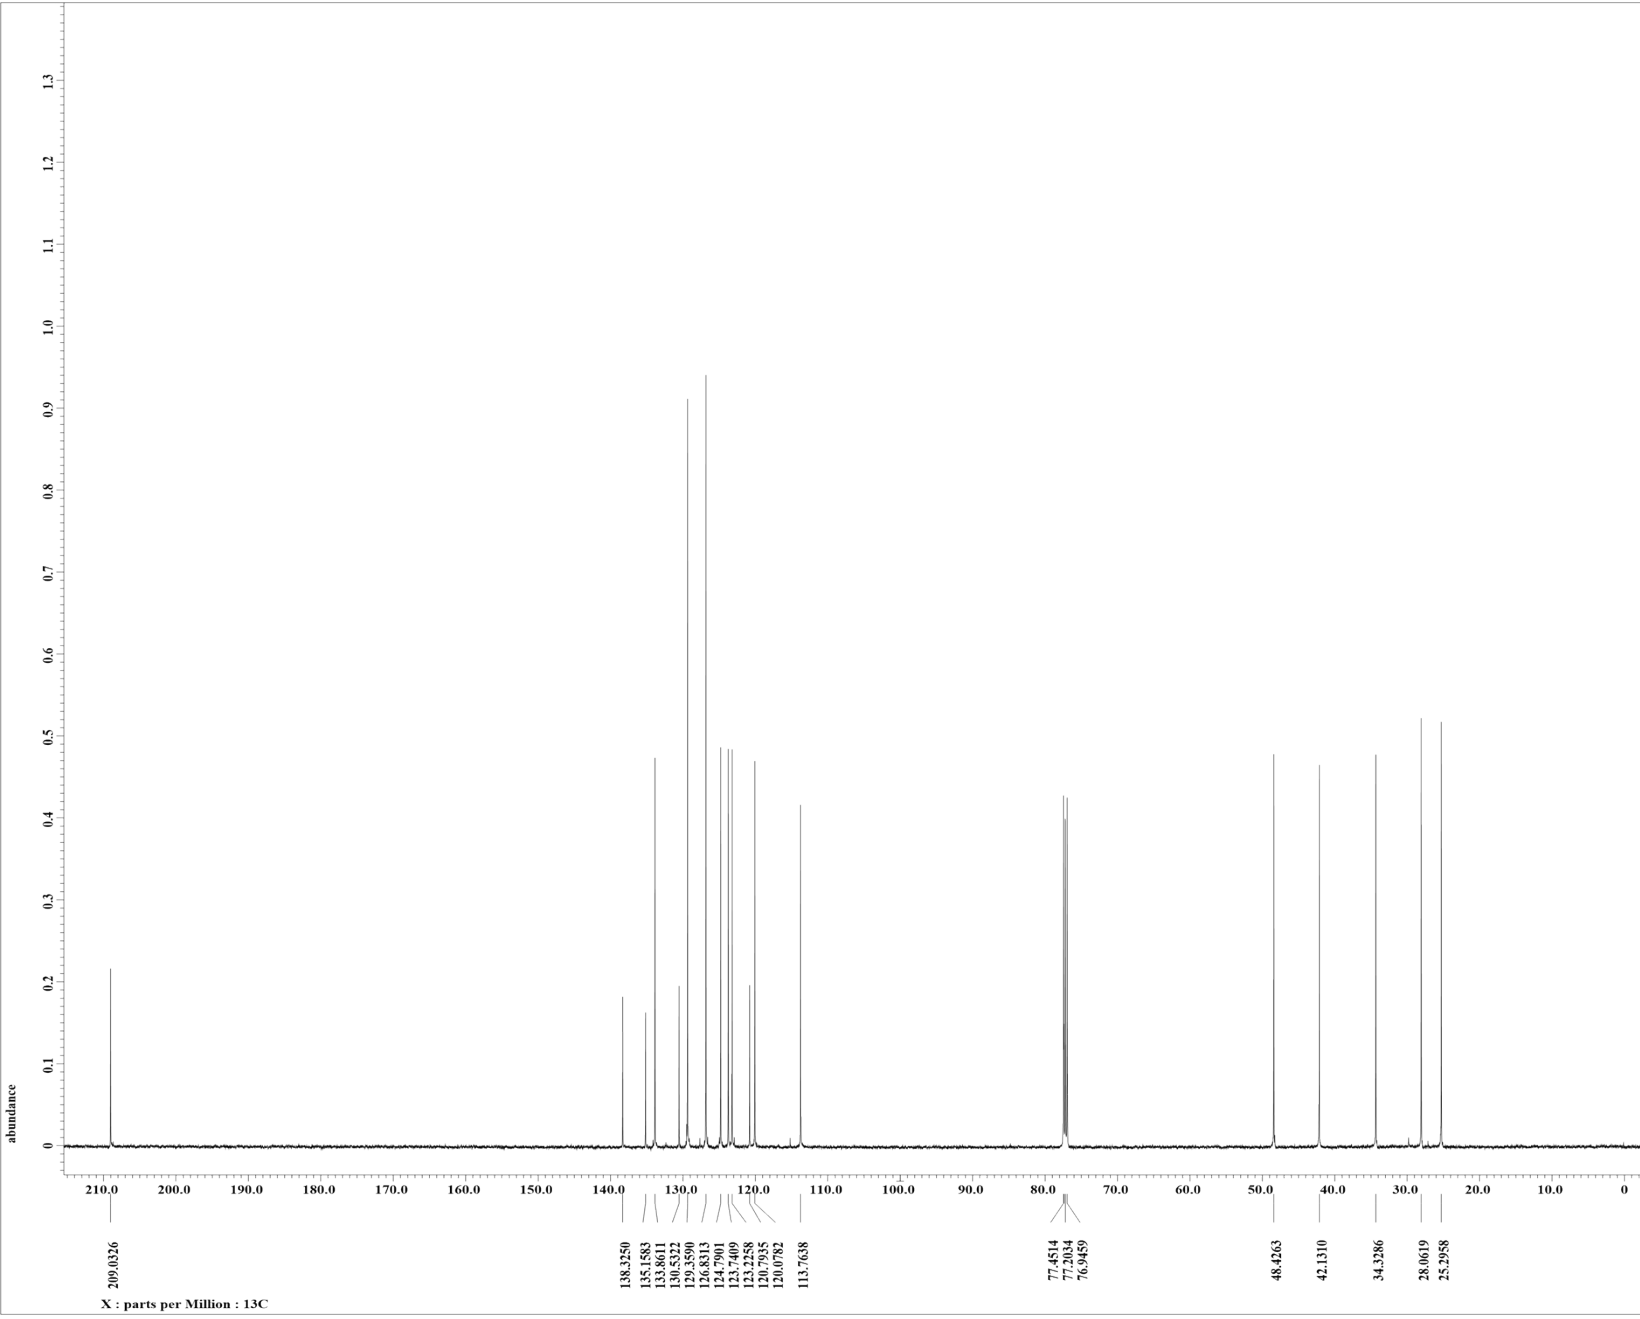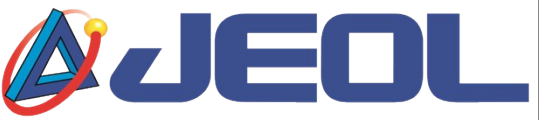

----- PROCESSING PARAMETERS -----  
dc balance : 0 : FALSE  
sexp : 2.0[Hz] : 0.0[s]  
trapezoid3 : 0[%] : 80[%] : 100[%]  
zerofill : 1  
fft : 1 : TRUE : TRUE  
machinephase  
ppm  
Derived from: TA200515-2-2.jdf

Filename = TA200515-2-4.jdf  
Author = delta  
Experiment = single pulse\_dec  
Sample\_id = S#615617  
Solvent = CHLOROFORM-D  
Creation\_time = 31-JUL-2000 20:21:58  
Revision\_time = 15-MAY-2020 18:39:08  
Current\_time = 15-MAY-2020 18:39:29  
  
Comment = single pulse decouple  
Data format = 1D COMPLEX  
Dim\_size = 26214  
Dim\_title = 13C  
Dim\_units = [ppm]  
Dimensions = X  
Site = ECA500  
Spectrometer = DELTA2\_NMR  
  
Field\_strength = 11.7473579[T] (500[MH  
X\_acq\_duration = 0.83361792[s]  
X\_domain = 13C  
X\_freq = 125.76529768[MHz]  
X\_offset = 100[ppm]  
X\_points = 32768  
X\_prescans = 4  
X\_resolution = 1.19959034[Hz]  
X\_sweep = 39.3081761[kHz]  
Irr\_domain = 1H  
Irr\_freq = 500.15991521[MHz]  
Irr\_offset = 5.0[ppm]  
Clipped = FALSE  
Mod\_return = 1  
Scans = 1936  
Total\_scans = 1936  
  
X\_90\_width = 12.8[us]  
X\_acq\_time = 0.83361792[s]  
X\_angle = 30[deg]  
X\_atn = 5.3[dB]  
X\_pulse = 4.26666667[us]  
Irr\_atn\_dec = 21.09[dB]  
Irr\_atn\_noe = 21.09[dB]  
Irr\_noise = WALTZ  
Decoupling = TRUE  
Initial\_wait = 1[s]  
Noe = TRUE  
Noe\_time = 2[s]  
Recvr\_gain = 54  
Relaxation\_delay = 2[s]  
Repetition\_time = 2.83361792[s]  
Temp\_get = 23.2[dC]

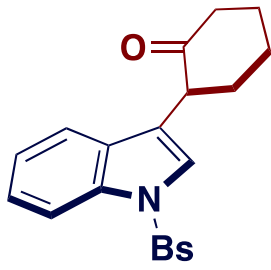

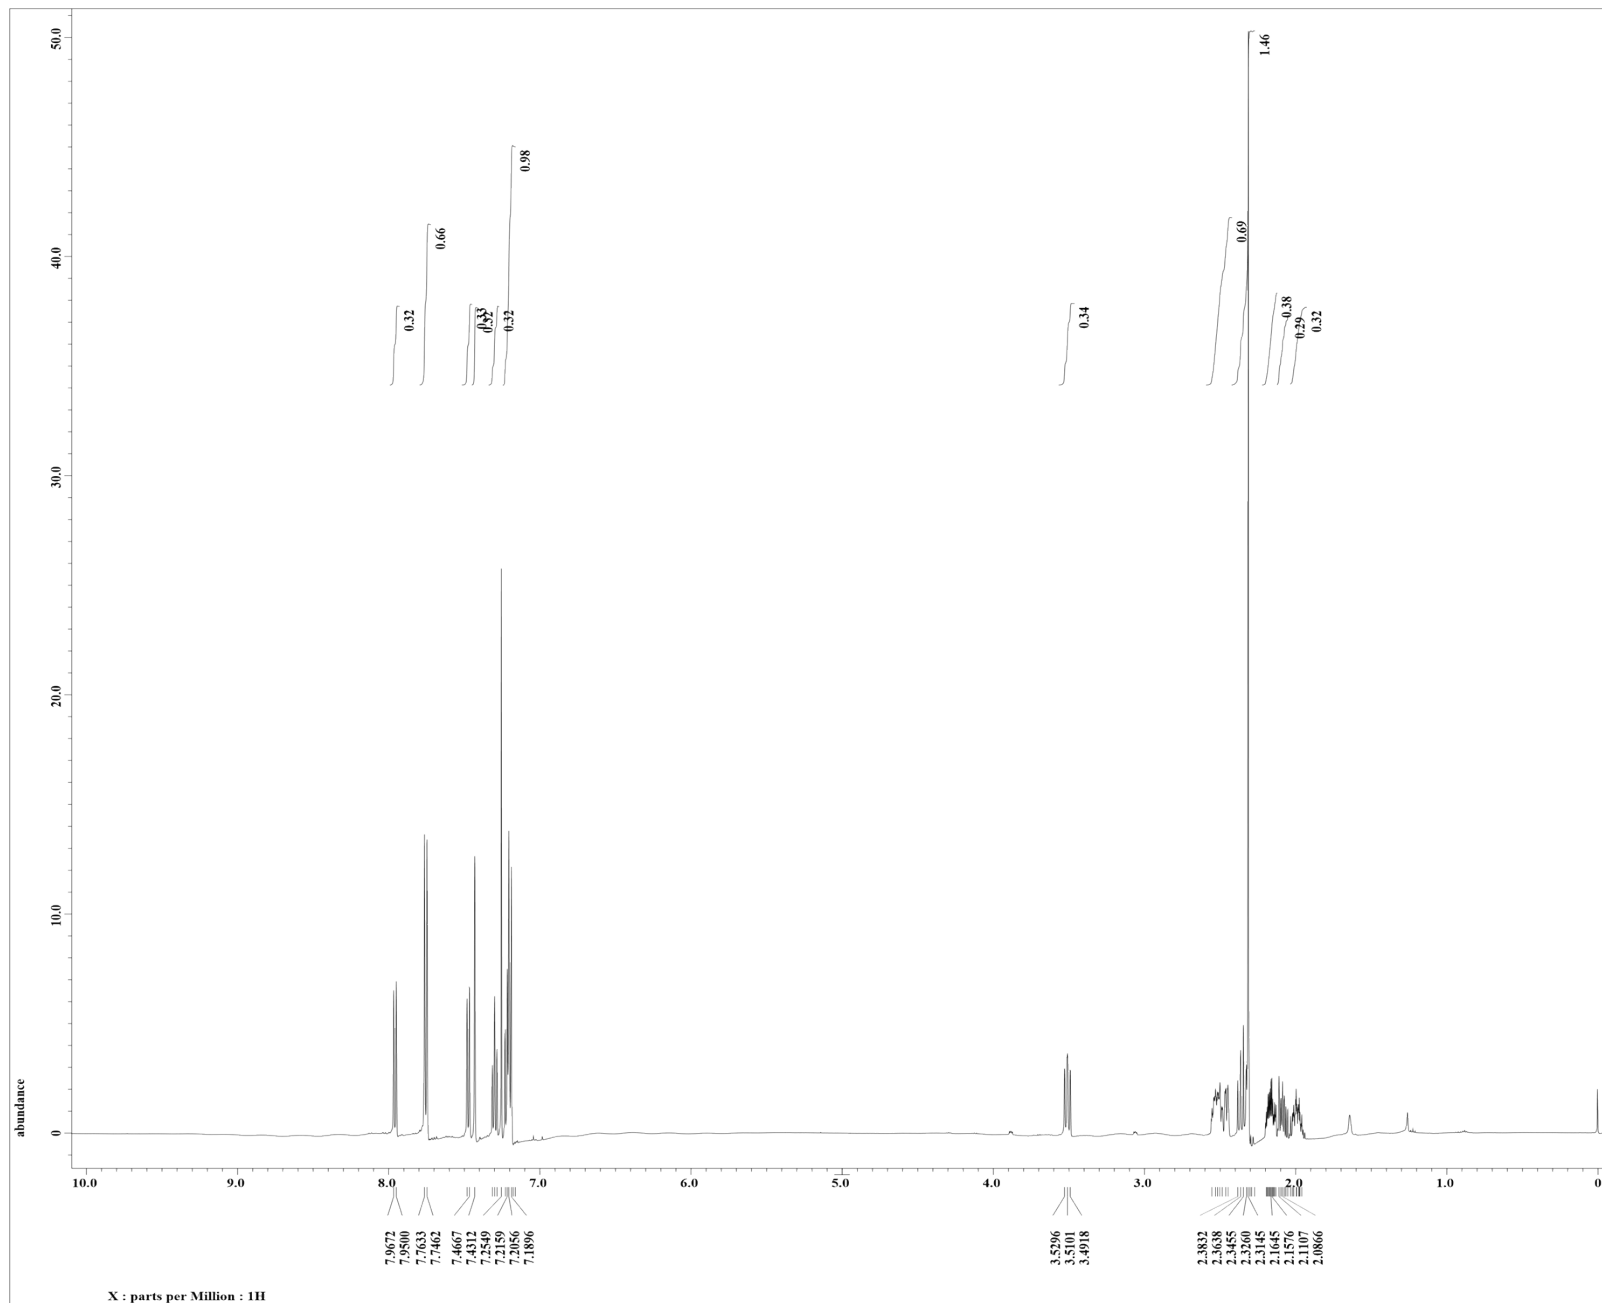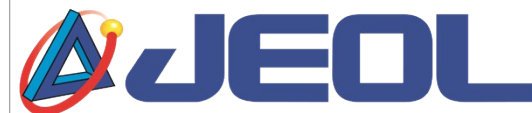

----- PROCESSING PARAMETERS -----  
 dc balance : 0 : FALSE  
 seKp : 0.2 [Hz] : 0.0 [s]  
 trapezoid3 : 0 [%] : 80 [%] : 100 [%]  
 zerofill : 1  
 fft : 1 : TRUE : TRUE  
 machinephase  
 ppm  
 Derived from: TA2019-1007-7.jdf

Filename = TA2019-1007-17.jdf  
 Author = delta  
 Experiment = single pulse.ex2  
 Sample\_id = 8#472209  
 Solvent = CHLOROFORM-D  
 Creation time = 7-OCT-2019 12:59:10  
 Revision time = 7-MAY-2020 13:03:36  
 Current Time = 7-MAY-2020 13:04:02  
 Comment = single pulse  
 Data format = 1D COMPLEX  
 Dim Size = 13107  
 Dim\_title = 1H  
 Dim\_units = [ppm]  
 Dimensions = X  
 Site = ECA500  
 Spectrometer = DELTA2 NMR  
 Field strength = 11.7473579 [T] (500 [MH  
 X\_acq\_duration = 1.74587904 [s]  
 X\_domain = 1H  
 X\_freq = 500.15991521 [MHz]  
 X\_offset = 5.0 [ppm]  
 X\_points = 16384  
 X\_prescans = 1  
 X\_resolution = 0.57277737 [Hz]  
 X\_sweep = 9.38438438 [kHz]  
 IFR\_domain = 1H  
 IFR\_freq = 500.15991521 [MHz]  
 IFR\_offset = 5.0 [ppm]  
 Tri\_domain = 1H  
 Tri\_freq = 500.15991521 [MHz]  
 Tri\_offset = 5.0 [ppm]  
 Clipped = TRUE  
 Mod return = 1  
 Scans = 8  
 Total\_scans = 8  
 X\_90\_width = 12 [us]  
 X\_acq\_time = 1.74587904 [s]  
 X\_angle = 45 [deg]  
 X\_atn = 3.4 [dB]  
 X\_pulse = 6 [us]  
 IFR\_mode = Off  
 Tri\_mode = Off  
 Dante\_preset = FALSE  
 Initial wait = 1 [s]  
 Recvr\_gain = 50  
 Relaxation delay = 5 [s]  
 Repetition\_time = 6.74587904 [s]  
 Temp\_get = 22.7 [dC]

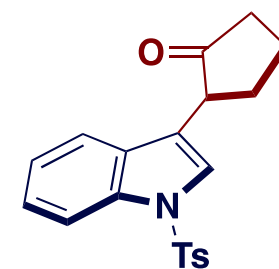

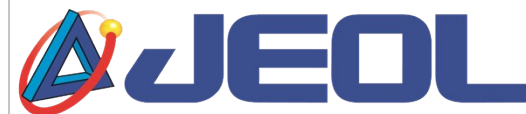

----- PROCESSING PARAMETERS -----  
dc balance : 0 : FALSE  
sexp : 2.0 [Hz] : 0.0 [s]  
trapezoid3 : 0 [%] : 80 [%] : 100 [%]  
zerofill : 1  
fft : 1 : TRUE : TRUE  
machinephase  
ppm  
Derived from: TA2019-1007-15.jdf

Filename = TA2019-1007-17.jdf  
Author = delta  
Experiment = single\_pulse\_dec  
Sample\_id = S#544196  
Solvent = CHLOROFORM-D  
Creation\_time = 7-OCT-2019 16:53:46  
Revision\_time = 7-MAY-2020 12:59:44  
Current\_time = 7-MAY-2020 13:00:54

Comment = single pulse decouple  
Data\_format = 1D COMPLEX  
Dim\_size = 26214  
Dim\_title = 13C  
Dim\_units = [ppm]  
Dimensions = X  
Site = ECA500  
Spectrometer = DELTA2\_NMR

Field\_strength = 11.7473579 [T] (500 [MH]  
X\_acq\_duration = 0.83361792 [s]  
X\_domain = 13C  
X\_freq = 125.76529768 [MHz]  
X\_offset = 100 [ppm]  
X\_points = 32768  
X\_prescans = 4  
X\_resolution = 1.19959034 [Hz]  
X\_sweep = 39.3081761 [kHz]  
Irr\_domain = 1H  
Irr\_freq = 500.15991521 [MHz]  
Irr\_offset = 5.0 [ppm]  
Clipped = FALSE  
Mod\_return = 1  
Scans = 2437  
Total\_scans = 2437

X\_90\_width = 12.8 [us]  
X\_acq\_time = 0.83361792 [s]  
X\_angle = 30 [deg]  
X\_atn = 5.3 [dB]  
X\_pulse = 4.26666667 [us]  
Irr\_atn\_dec = 21.09 [dB]  
Irr\_atn\_noe = 21.09 [dB]  
Irr\_noise = WALTZ  
Decoupling = TRUE  
Initial\_wait = 1 [s]  
Noe = TRUE  
Noe\_time = 2 [s]  
Recvr\_gain = 54  
Relaxation\_delay = 2 [s]  
Repetition\_time = 2.83361792 [s]  
Temp\_get = 22.3 [dC]

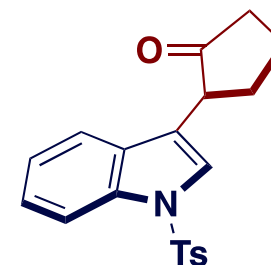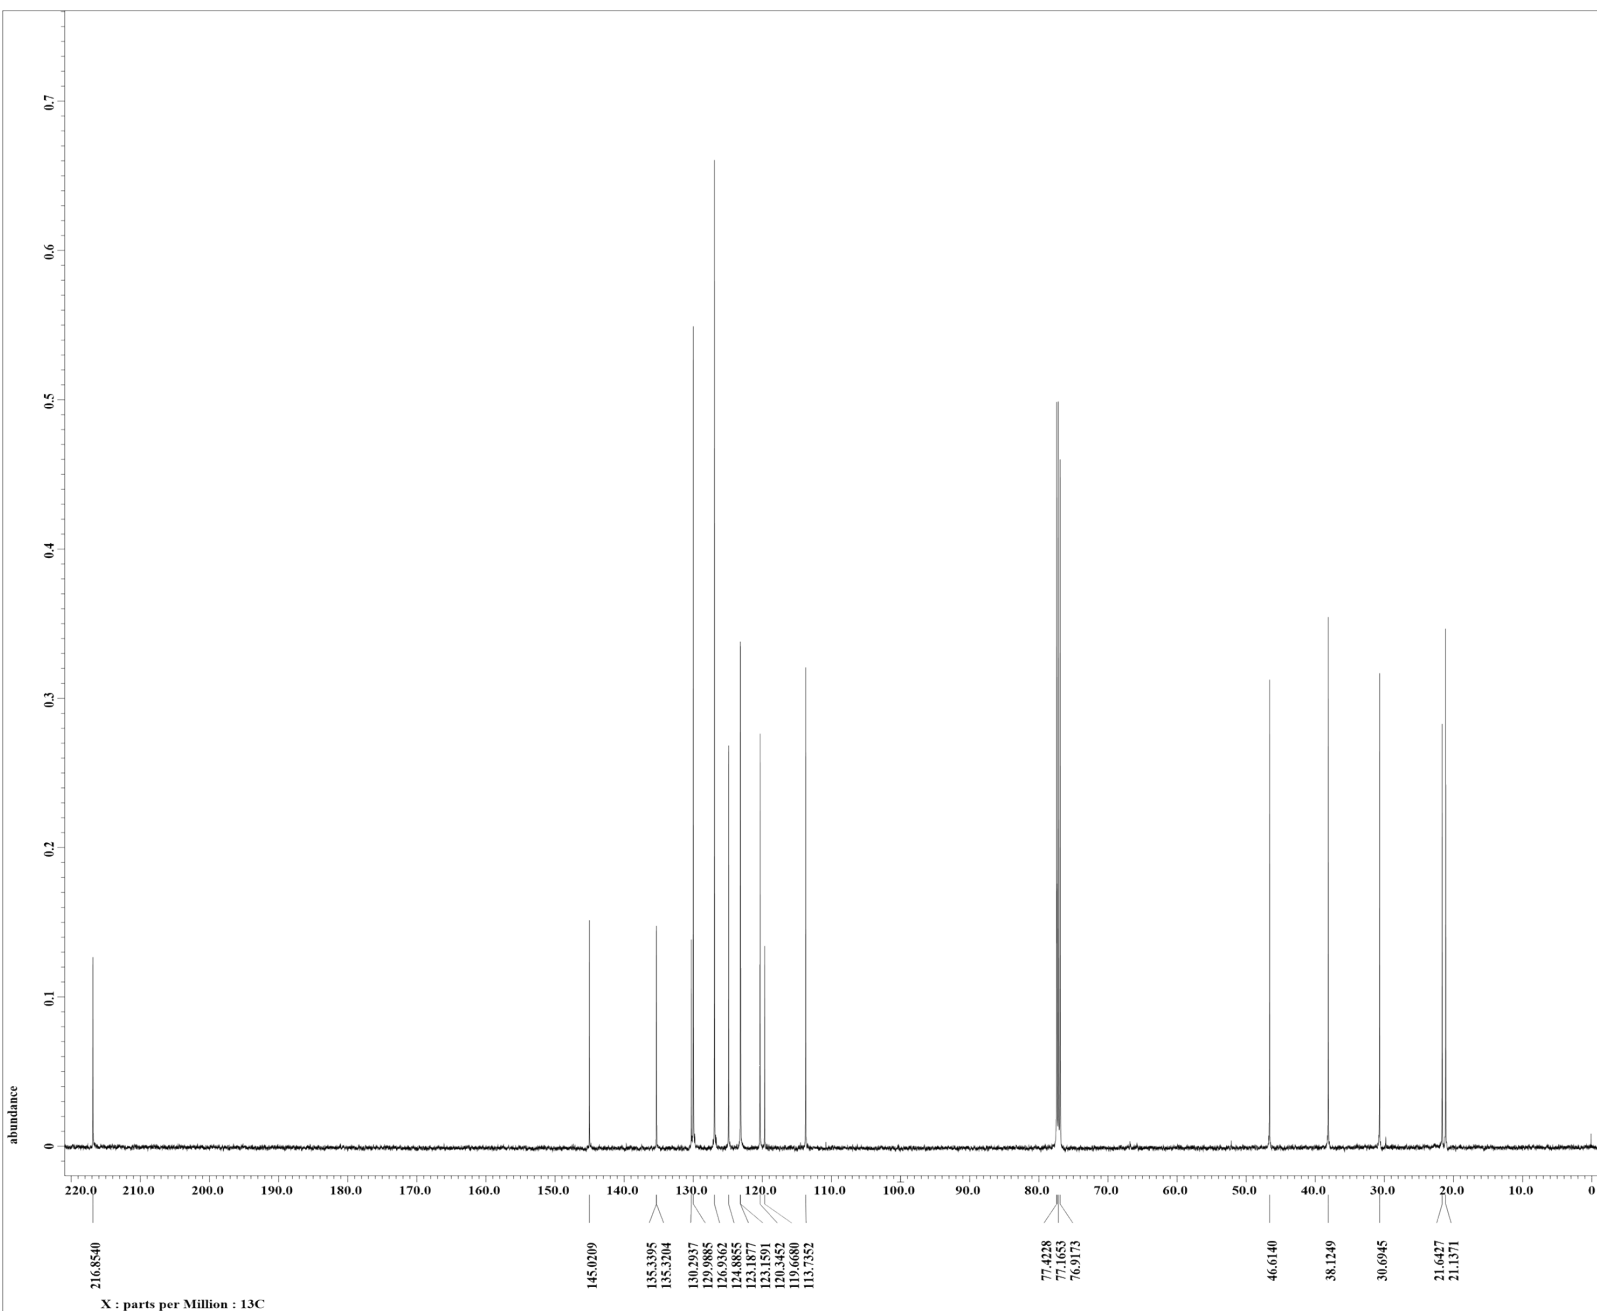

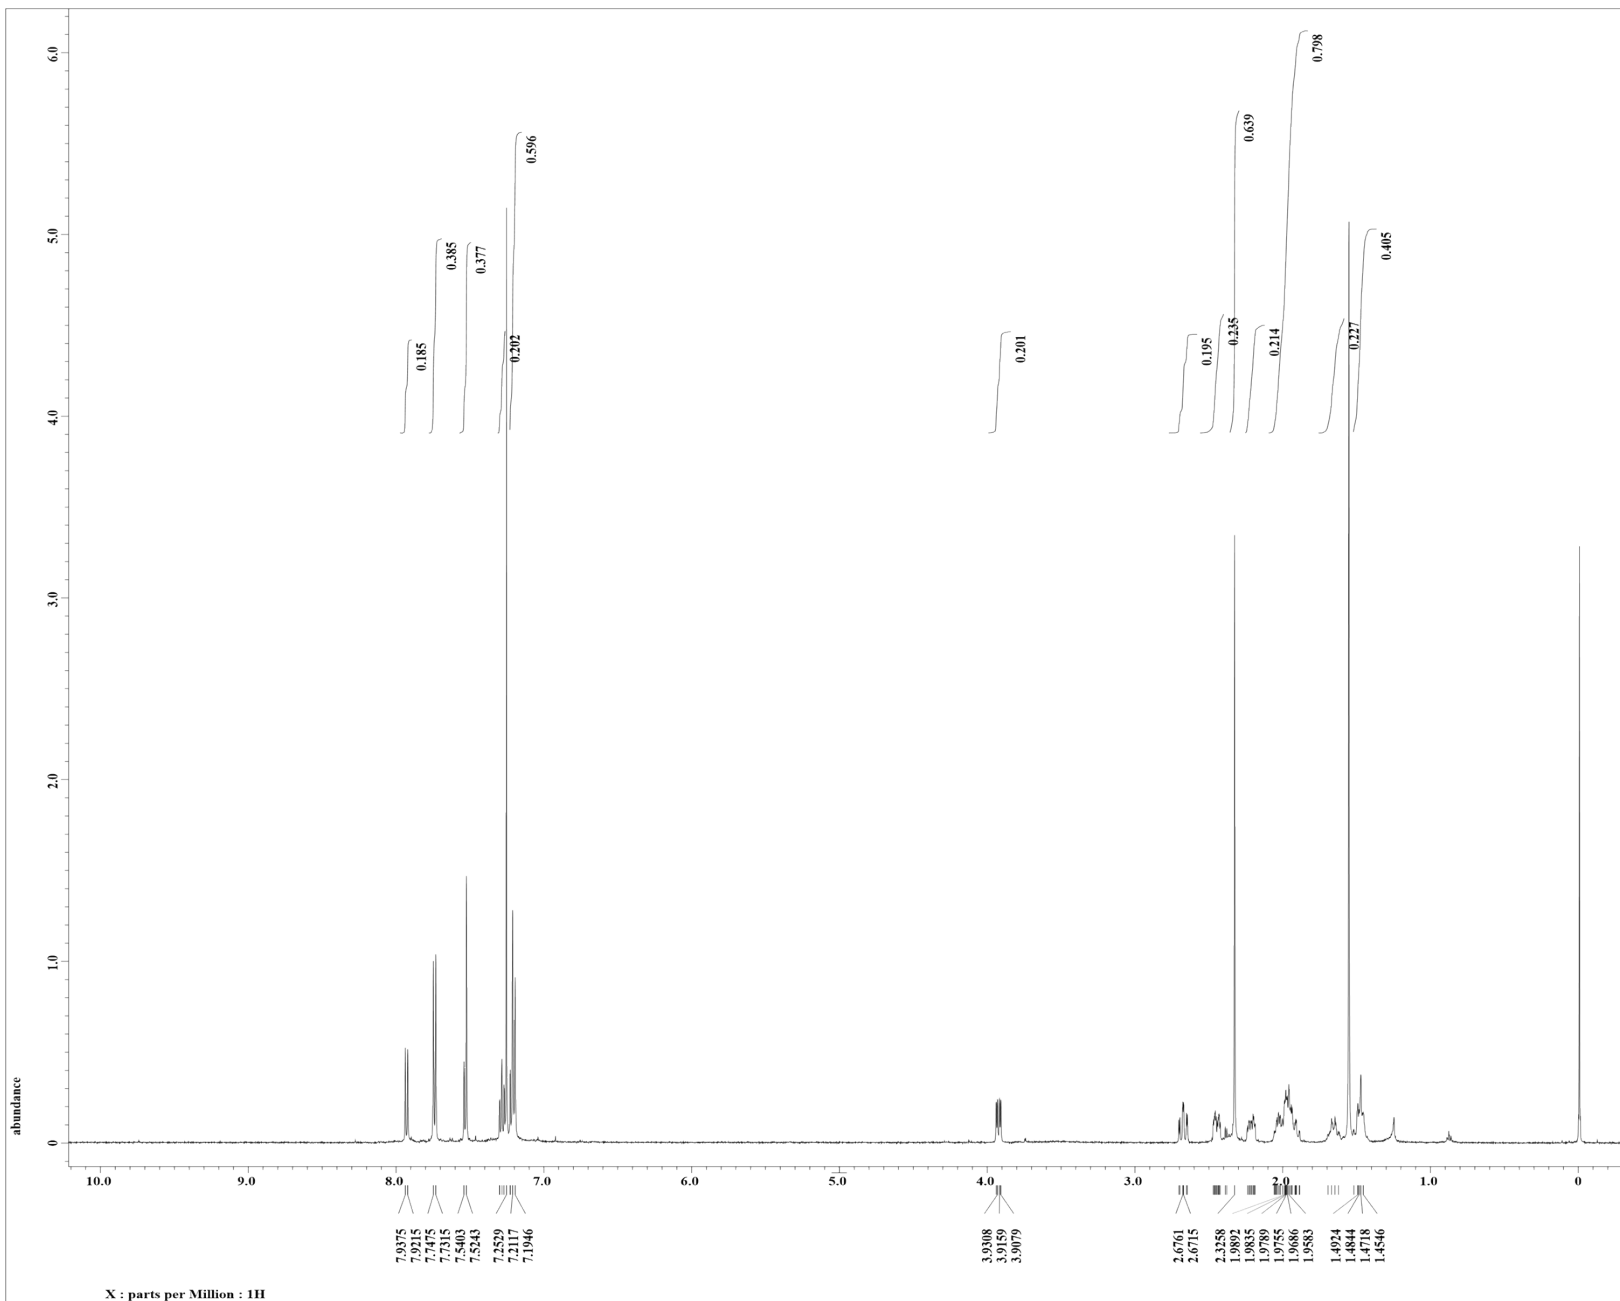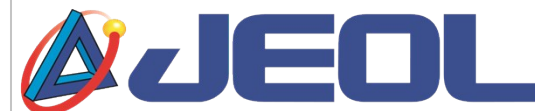

Filename = TA200529-cycloheptano  
 Author = delta  
 Experiment = single\_pulse.ex2  
 Sample\_id = S#309246  
 Solvent = CHLOROFORM-D  
 Creation\_time = 29-MAY-2020 07:56:51  
 Revision\_time = 29-MAY-2020 08:43:07  
 Current\_time = 29-MAY-2020 08:43:50

Content = cycloheptanone  
 Data\_format = 1D\_COMPLEX  
 Dim\_size = 13107  
 Dim\_title = 1H  
 Dim\_units = [ppm]  
 Dimensions = X  
 Site = ECA 500  
 Spectrometer = DELTA2\_NMR

Field\_strength = 11.62926421[T] (500[M]  
 X\_acq\_duration = 1.76422912[s]  
 X\_domain = 1H  
 X\_freq = 495.13191398[MHz]  
 X\_offset = 5[ppm]  
 X\_points = 16384  
 X\_prescans = 1  
 X\_resolution = 0.5668198[Hz]  
 X\_sweep = 9.28677563[kHz]  
 Irr\_domain = 1H  
 Irr\_freq = 495.13191398[MHz]  
 Irr\_offset = 5[ppm]  
 Tri\_domain = 1H  
 Tri\_freq = 495.13191398[MHz]  
 Tri\_offset = 5[ppm]  
 Clipped = FALSE  
 Mod\_return = 1  
 Scans = 8  
 Total\_scans = 8

X\_90\_width = 11.3[us]  
 X\_acq\_time = 1.76422912[s]  
 X\_angle = 45[deg]  
 X\_atn = 3.3[dB]  
 X\_pulse = 5.65[us]  
 Irr\_mode = Off  
 Tri\_mode = Off  
 Dante\_presat = FALSE  
 Initial\_wait = 1[s]  
 Recvr\_gain = 50  
 Relaxation\_delay = 5[s]  
 Repetition\_time = 6.76422912[s]  
 Temp\_get = 23.7[dc]

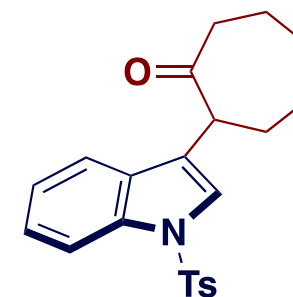

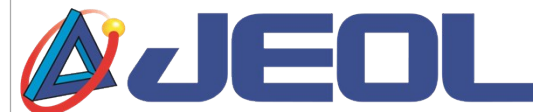

Filename = TA200529-cycloheptano  
Author = delta  
Experiment = single\_pulse\_dec  
Sample\_id = S8312929  
Solvent = CHLOROFORM-D  
Creation\_time = 29-MAY-2020 10:04:13  
Revision\_time = 29-MAY-2020 10:44:32  
Current\_Time = 29-MAY-2020 10:45:14

Content = cycloheptanone-13C  
Data\_format = 1D COMPLEX  
Dim\_size = 26214  
Dim\_title = 13C  
Dim\_units = [ppm]  
Dimensions = X  
Site = ECA 500  
Spectrometer = DELTA2\_NMR

Field\_strength = 11.62926421[T] (500[M]  
X\_acq\_duration = 0.8388608[s]  
X\_domain = 13C  
X\_freq = 124.5010059[MHz]  
X\_offset = 100[ppm]  
X\_points = 32768  
X\_prescans = 4  
X\_resolution = 1.1920929[Hz]  
X\_sweep = 39.0625[kHz]  
Irr\_domain = 1H  
Irr\_freq = 495.13191398[MHz]  
Irr\_offset = 5[ppm]  
Clipped = FALSE  
Mod\_return = 1  
Scans = 2568  
Total\_scans = 2568

X\_90\_width = 10.1[us]  
X\_acq\_time = 0.8388608[s]  
X\_angle = 30[deg]  
X\_atn = 9.5[dB]  
X\_pulse = 3.36666667[us]  
Irr\_atn\_dec = 21.51[dB]  
Irr\_atn\_noe = 21.51[dB]  
Irr\_noise = WALTZ  
Decoupling = TRUE  
Initial\_wait = 1[s]  
Noe = TRUE  
Noe\_time = 2[s]  
Recvr\_gain = 60  
Relaxation\_delay = 2[s]  
Repetition\_time = 2.8388608[s]  
Temp\_get = 24.7[dc]

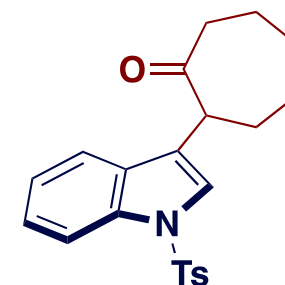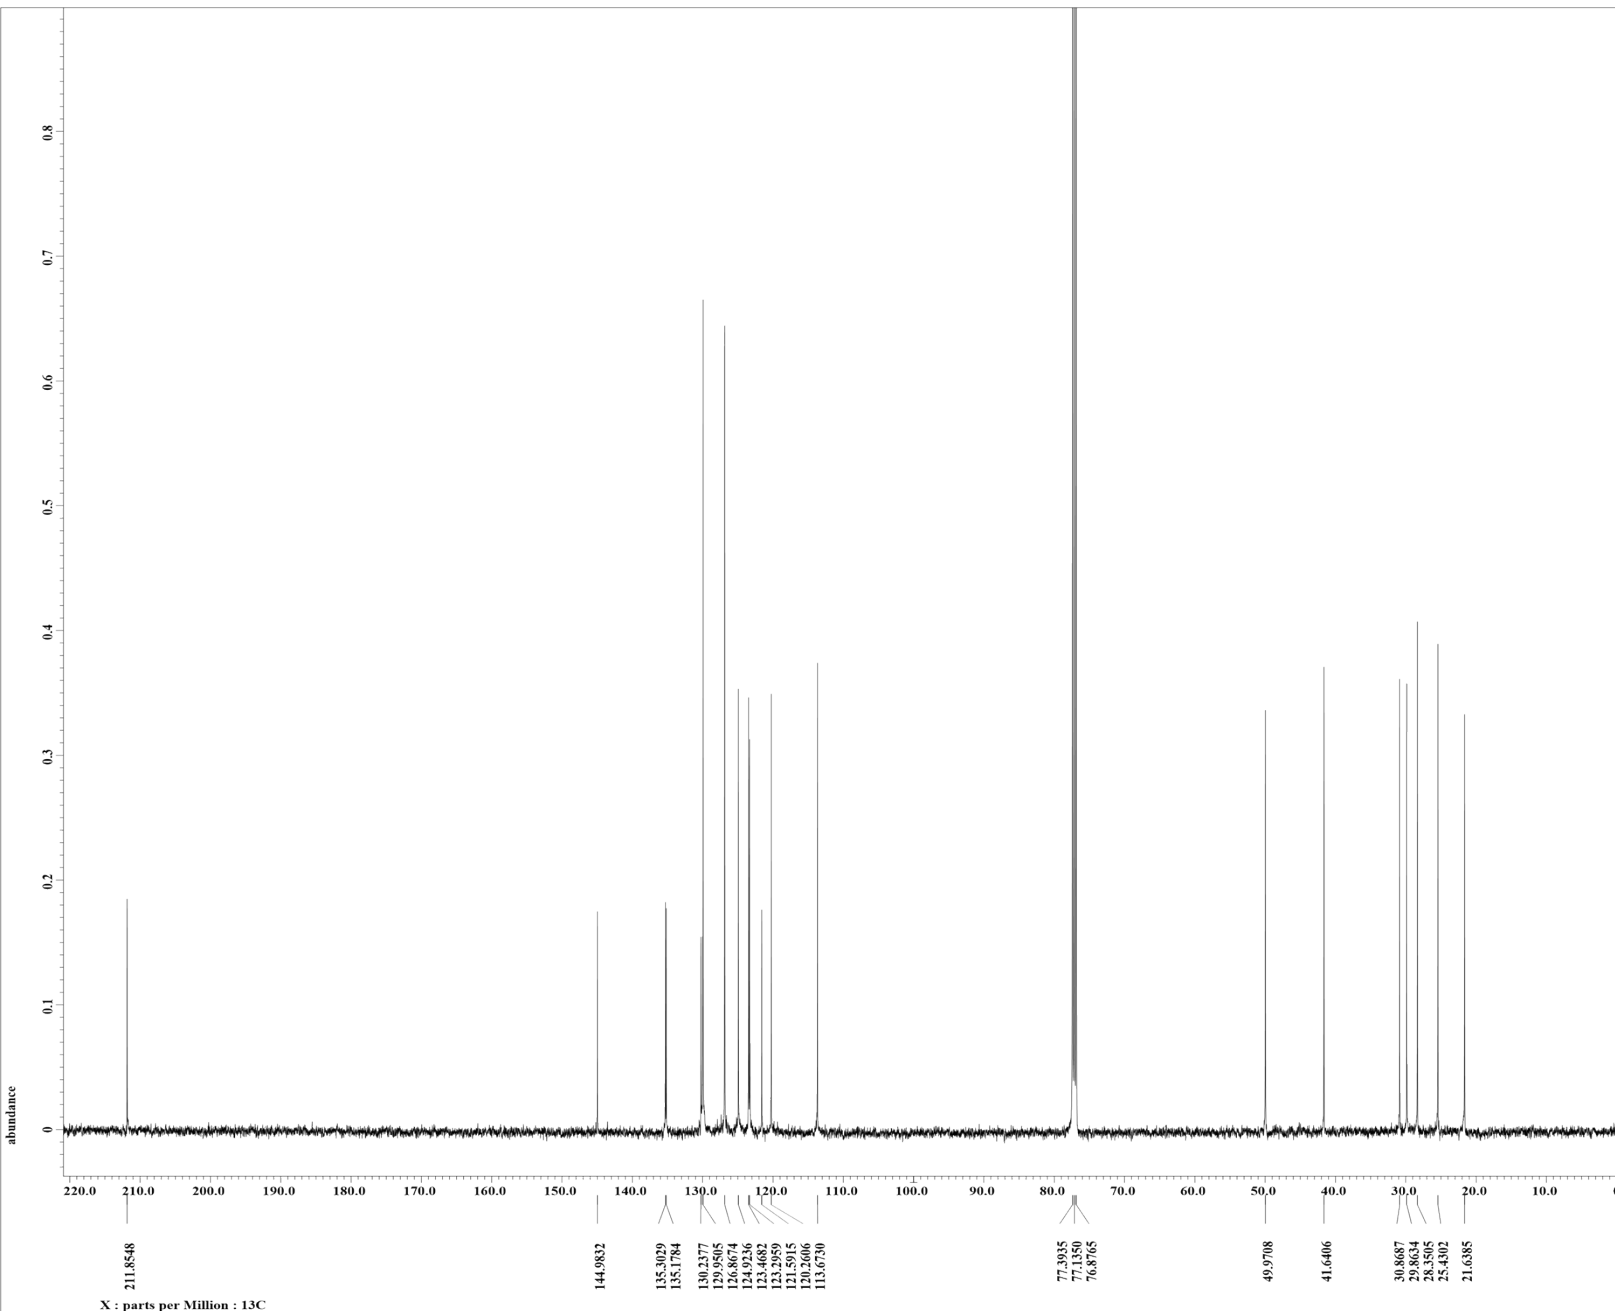



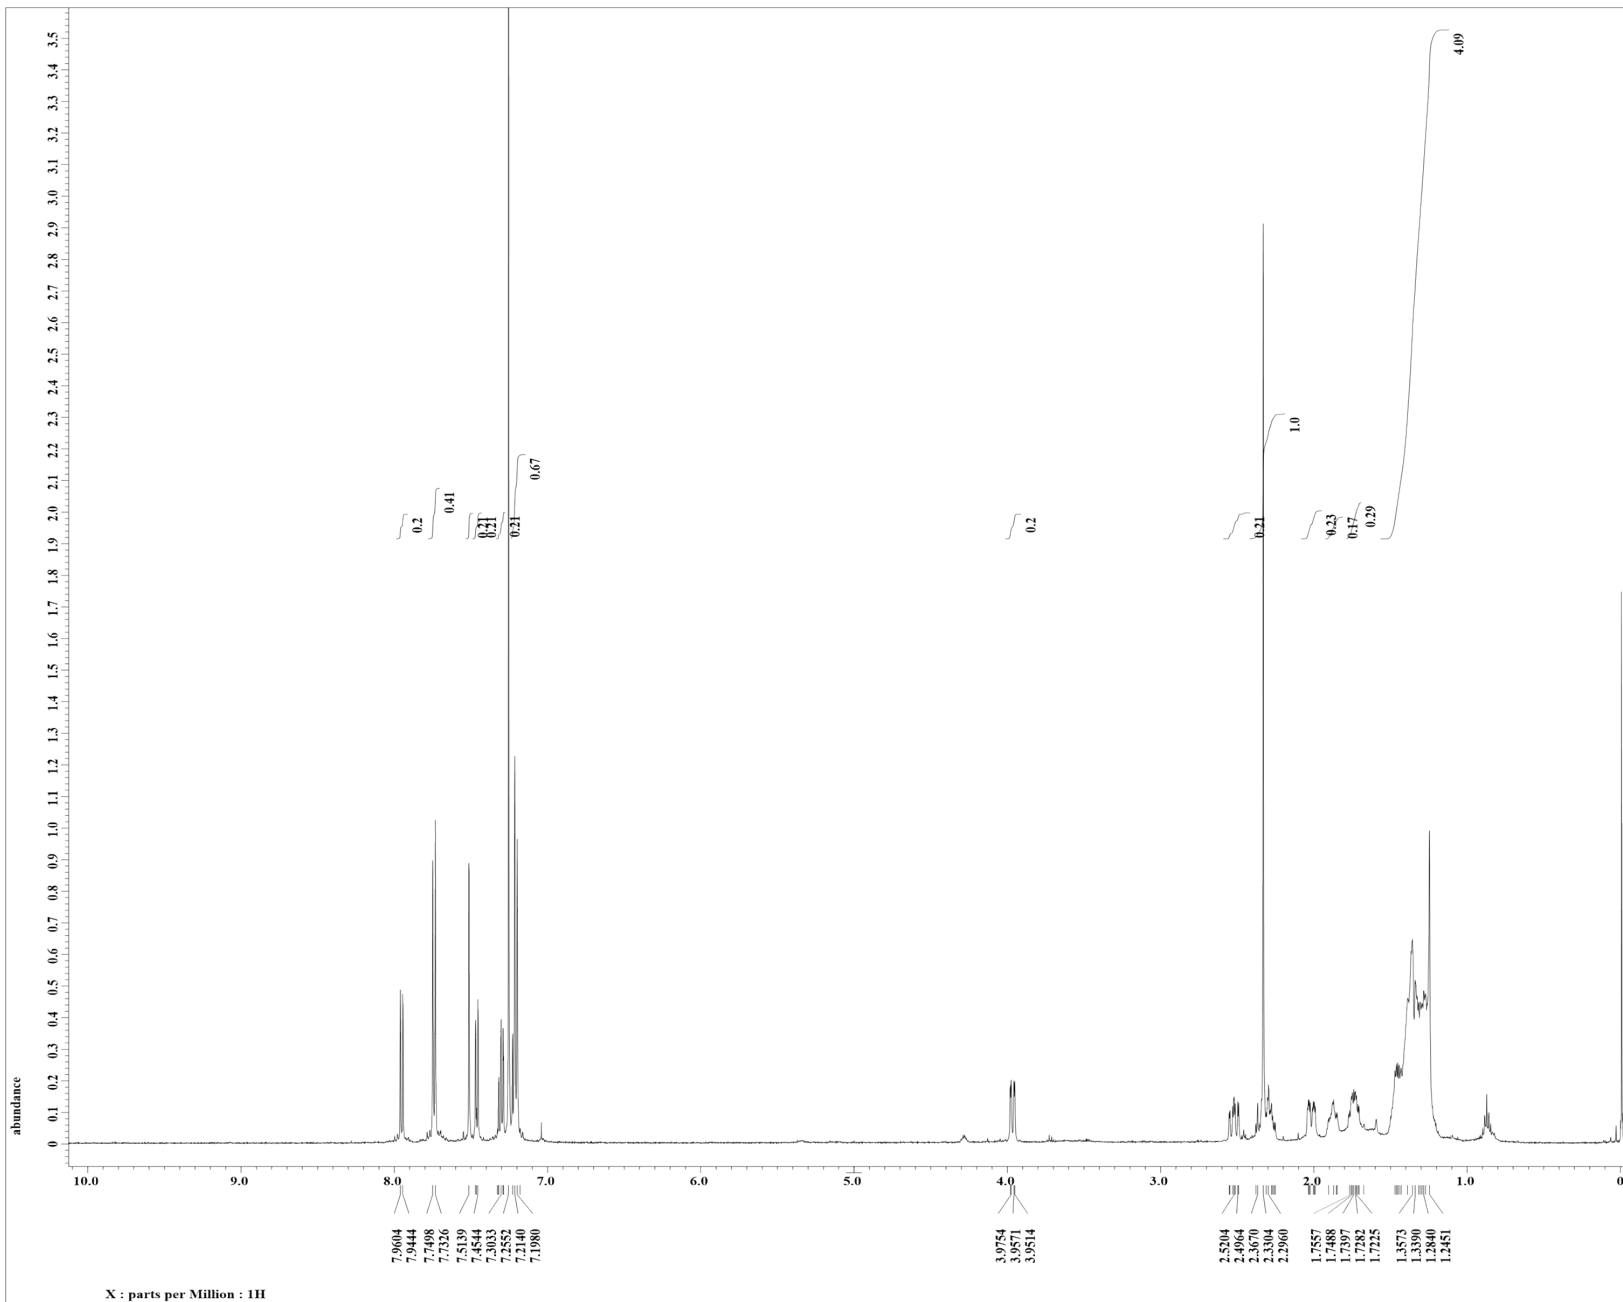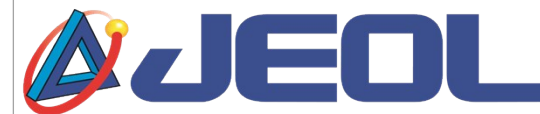

----- PROCESSING PARAMETERS -----  
 dc balance : 0 : FALSE  
 seExp : 0.2[Hz] : 0.0[s]  
 trapexoid3 : 0[%] : 80[%] : 100[%]  
 zerofill : 1  
 fft : 1 : TRUE : TRUE  
 machinephase  
 ppm  
 Derived from: TA191007-2.jdf

Filename = TA191007-5.jdf  
 Author = delta  
 Experiment = single pulse.ex2  
 Sample\_id = S#554909  
 Solvent = CHLOROFORM-D  
 Creation time = 7-OCT-2019 14:49:48  
 Revision\_time = 8-MAY-2020 08:10:51  
 Current\_time = 8-MAY-2020 08:11:22

Comment = single pulse  
 Data\_format = 1D COMPLEX  
 Dim\_size = 13107  
 Dim\_title = 1H  
 Dim\_units = [ppm]  
 Dimensions = X  
 Site = ECA 500  
 Spectrometer = DELTA2 NMR

Field strength = 11.62926421[T] (500[M]  
 X\_acq\_duration = 1.76422912[s]  
 X\_domain = 1H  
 X\_freq = 495.13191398[MHz]  
 X\_offset = 5[ppm]  
 X\_points = 16384  
 X\_prescans = 1  
 X\_resolution = 0.5668198[Hz]  
 X\_sweep = 9.28677563[kHz]  
 IPr\_domain = 1H  
 Irr\_freq = 495.13191398[MHz]  
 Irr\_offset = 5[ppm]  
 Tri\_domain = 1H  
 Tri\_freq = 495.13191398[MHz]  
 Tri\_offset = 5[ppm]  
 Clipped = FALSE  
 Mod return = 1  
 Scans = 8  
 Total\_scans = 8

X\_90\_width = 11.3[us]  
 X\_acq\_time = 1.76422912[s]  
 X\_angle = 45[deg]  
 X\_atn = 3.3[dB]  
 X\_pulse = 5.65[us]  
 IPr\_mode = Off  
 Tri\_mode = Off  
 Dante presat = FALSE  
 Initial wait = 1[s]  
 Recvr\_gain = 44  
 Relaxation delay = 5[s]  
 Repetition\_time = 6.76422912[s]  
 Temp\_get = 19.9[dC]

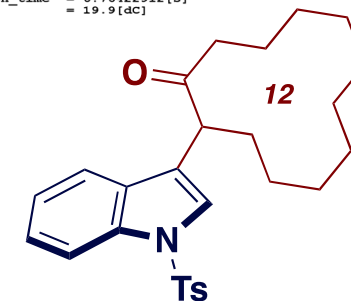

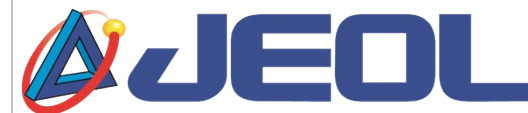

----- PROCESSING PARAMETERS -----  
dc balance : 0 : FALSE  
seExp : 2.0 [Hz] : 0.0 [s]  
trapezoid3 : 0 [%] : 80 [%] : 100 [%]  
zeroFill : 1  
fft : 1 : TRUE : TRUE  
machinephase  
ppm  
Derived from: TA2019-1007-12-1.jdf

Filename = TA2019-1007-12-3.jdf  
Author = delta  
Experiment = single\_pulse\_dec  
Sample\_id = S#620234  
Solvent = CHLOROFORM-D  
Creation time = 8-OCT-2019 08:00:14  
Revision time = 7-MAY-2020 13:09:15  
Current Time = 7-MAY-2020 13:10:16

Comment = single pulse decouple  
Data format = 1D COMPLEX  
Dim Size = 26214  
Dim title = 13C  
Dim units = [ppm]  
Dimensions = X  
Site = ECA500  
Spectrometer = DELTA2\_NMR

Field strength = 11.7473579 [T] (500 [MH  
X\_acq\_duration = 0.83361792 [s]  
X\_domain = 13C  
X\_freq = 125.76529768 [MHz]  
X\_offset = 100 [ppm]  
X\_points = 32768  
X\_prescans = 4  
X\_resolution = 1.19959034 [Hz]  
X\_sweep = 39.3081761 [kHz]  
Irr\_domain = 1H  
Irr\_freq = 500.15991521 [MHz]  
Irr\_offset = 5.0 [ppm]  
Clipped = FALSE  
Mod\_return = 1  
Scans = 18950  
Total\_scans = 18950

X\_90\_width = 12.8 [us]  
X\_acq\_time = 0.83361792 [s]  
X\_angle = 30 [deg]  
X\_atn = 5.3 [dB]  
X\_pulse = 4.26666667 [us]  
Irr\_atn\_dec = 21.09 [dB]  
Irr\_atn\_noe = 21.09 [dB]  
Irr\_noise = WALTZ  
Decoupling = TRUE  
Initial\_wait = 1 [s]  
Noe = TRUE  
Noe\_time = 2 [s]  
Recvr\_gain = 60  
Relaxation\_delay = 2 [s]  
Repetition\_time = 2.83361792 [s]  
Temp\_get = 22.7 [dc]

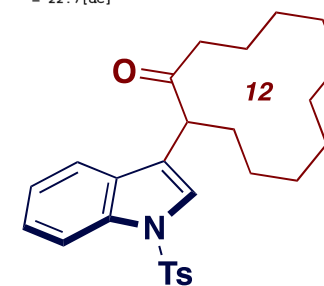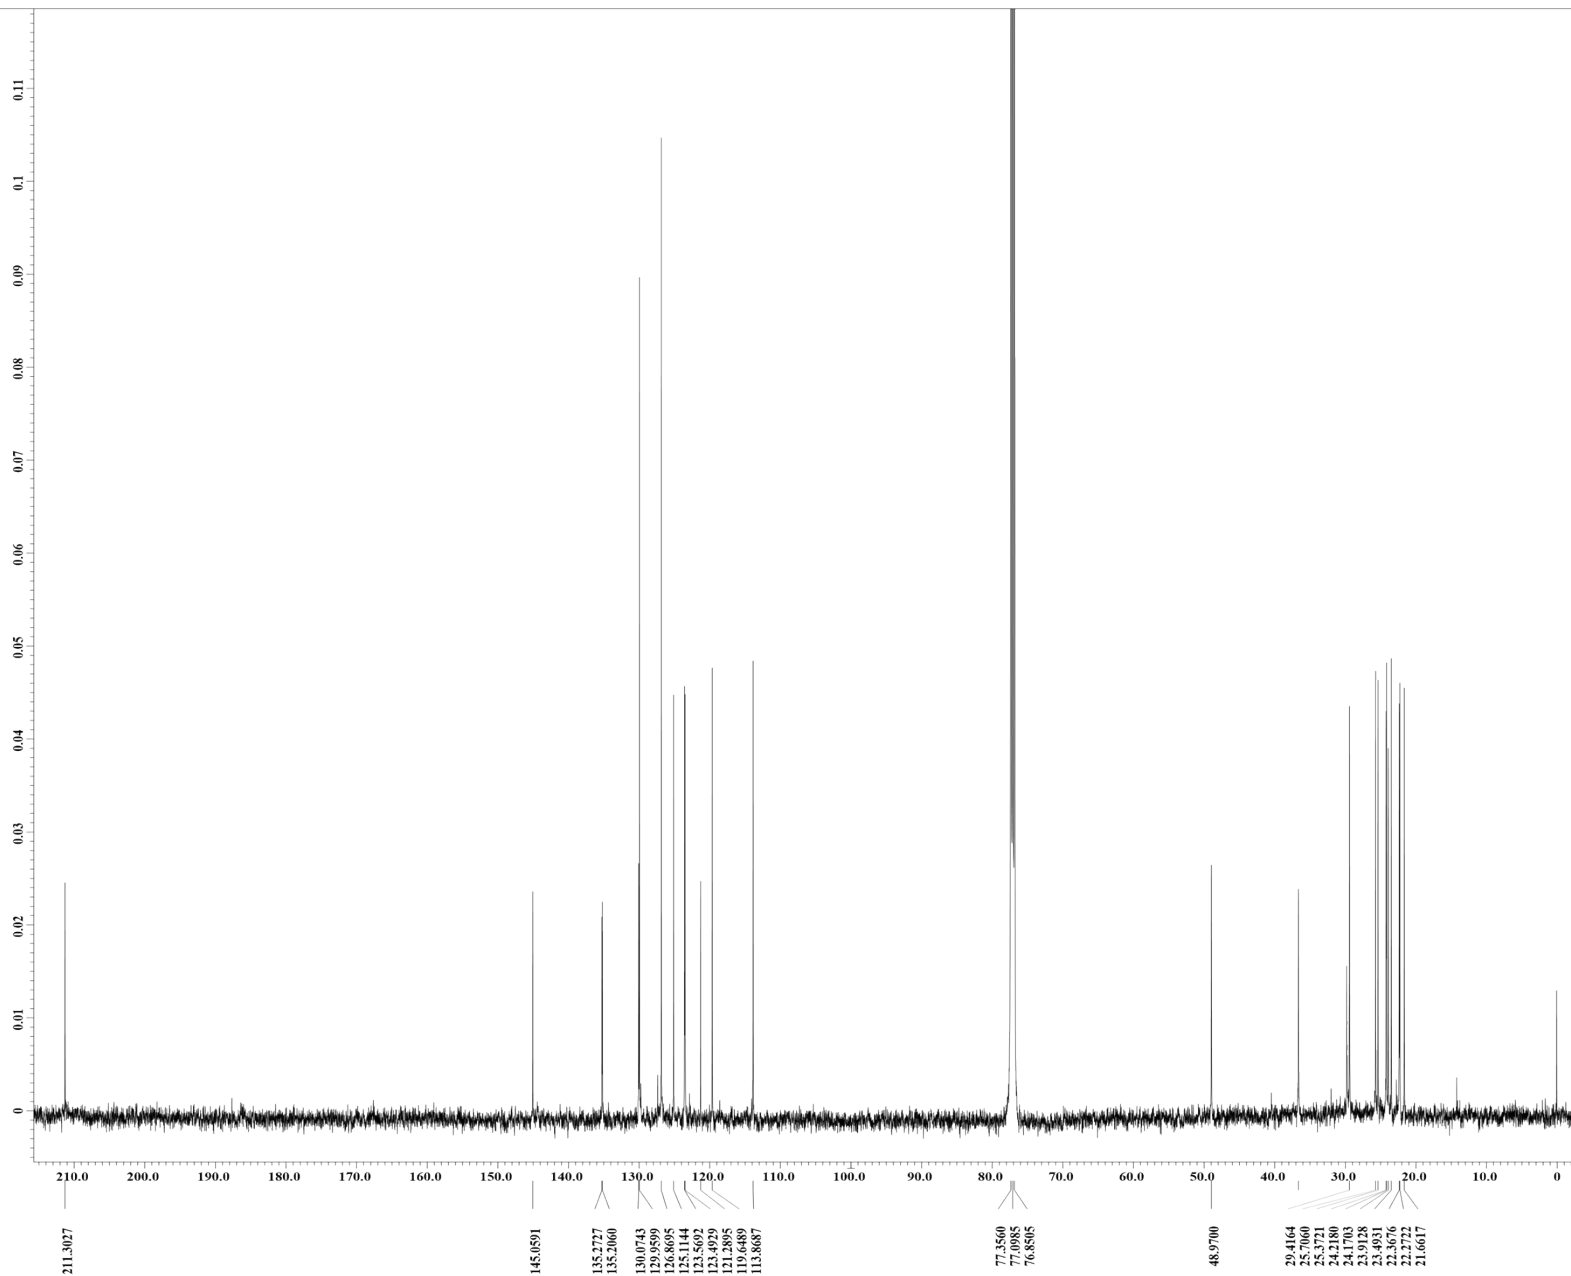

X : parts per Million : 13C

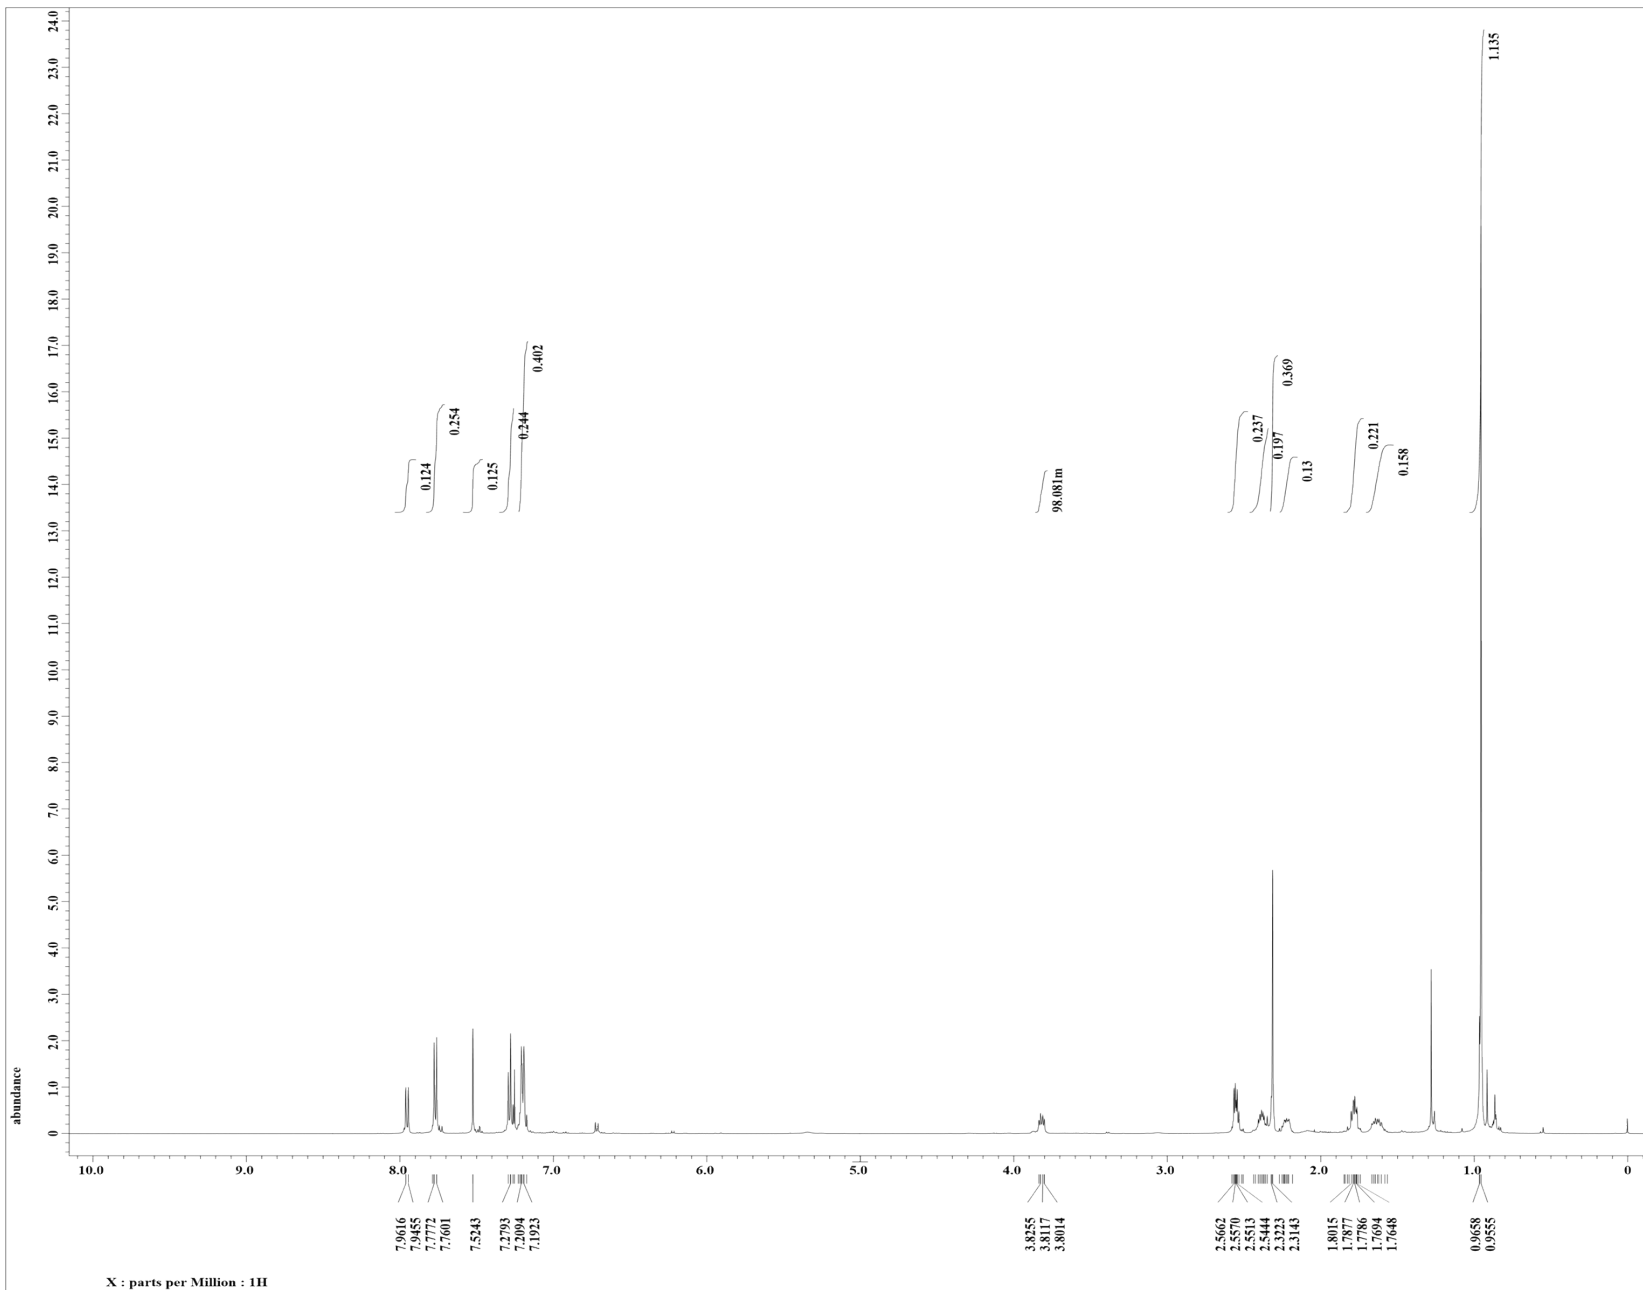



|               |                         |
|---------------|-------------------------|
| Filename      | = TA200618-4-tert-Bu-cy |
| Author        | = delta                 |
| Experiment    | = single pulse.ex2      |
| Sample id     | = S#592927              |
| Solvent       | = CHLOROFORM-D          |
| Creation time | = 18-JUN-2020 15:51:02  |
| Revision time | = 18-JUN-2020 16:44:13  |
| Current time  | = 18-JUN-2020 16:45:11  |

  

|              |              |
|--------------|--------------|
| Content      | = F20-25     |
| Data format  | = 1D COMPLEX |
| Dim size     | = 13107      |
| Dim title    | = 1H         |
| Dim units    | = [ppm]      |
| Dimensions   | = X          |
| Site         | = ECA 500    |
| Spectrometer | = DELTA2_NMR |

  

|                |                             |
|----------------|-----------------------------|
| Field strength | = 11.62926421 [T] (500 [M]) |
| X_acq_duration | = 1.76422912 [s]            |
| X_domain       | = 1H                        |
| X_freq         | = 495.13191398 [MHz]        |
| X_offset       | = 5 [ppm]                   |
| X_points       | = 16384                     |
| X_prescans     | = 1                         |
| X_resolution   | = 0.5668198 [Hz]            |
| X_sweep        | = 9.28677563 [kHz]          |
| Irr_domain     | = 1H                        |
| Irr_freq       | = 495.13191398 [MHz]        |
| Irr_offset     | = 5 [ppm]                   |
| Tri_domain     | = 1H                        |
| Tri_freq       | = 495.13191398 [MHz]        |
| Tri_offset     | = 5 [ppm]                   |
| Clipped        | = FALSE                     |
| Mod return     | = 1                         |
| Scans          | = 8                         |
| Total_scans    | = 8                         |

  

|                  |                  |
|------------------|------------------|
| X_90_width       | = 11.3 [us]      |
| X_acq_time       | = 1.76422912 [s] |
| X_angle          | = 45 [deg]       |
| X_atn            | = 3.3 [dB]       |
| X_pulse          | = 5.65 [us]      |
| Irr_mode         | = Off            |
| Tri_mode         | = Off            |
| Dante presat     | = FALSE          |
| Initial wait     | = 1 [s]          |
| Recvr_gain       | = 34             |
| Relaxation delay | = 5 [s]          |
| Repetition_time  | = 6.76422912 [s] |
| Temp_get         | = 24.4 [dc]      |



Filename = TA200618-4-tert-Bu-cy  
 Author = delta  
 Experiment = single\_pulse\_dec  
 Sample\_id = S8600953  
 Solvent = CHLOROFORM-D  
 Creation time = 18-JUN-2020 16:10:38  
 Revision time = 19-JUN-2020 07:55:11  
 Current Time = 19-JUN-2020 07:55:42

Content = single\_pulse\_decouple  
 Data format = 1D COMPLEX  
 Dim Size = 26214  
 Dim\_title = 13C  
 Dim\_units = [ppm]  
 Dimensions = X  
 Site = ECA 500  
 Spectrometer = DELTA2\_NMR

Field strength = 11.62926421[T] (500[M]  
 X\_acq\_duration = 0.8388608[s]  
 X\_domain = 13C  
 X\_freq = 124.5010059[MHz]  
 X\_offset = 100[ppm]  
 X\_points = 32768  
 X\_prescans = 4  
 X\_resolution = 1.1920929[Hz]  
 X\_sweep = 39.0625[kHz]  
 IFF\_domain = 1H  
 Irr\_freq = 495.13191398[MHz]  
 Irr\_offset = 5[ppm]  
 Clipped = FALSE  
 Incomplete\_copy = TRUE  
 Mod\_return = 1  
 Scans = 144  
 Total\_scans = 144

X\_90\_width = 10.1[us]  
 X\_acq\_time = 0.8388608[s]  
 X\_angle = 30[deg]  
 X\_atn = 9.5[dB]  
 X\_pulse = 3.36666667[us]  
 Irr\_atn\_dec = 21.51[dB]  
 Irr\_atn\_noe = 21.51[dB]  
 Irr\_noise = WALTZ  
 Decoupling = TRUE  
 Initial\_wait = 1[s]  
 Noe = TRUE  
 Noe\_time = 2[s]  
 Recvz\_gain = 60  
 Relaxation\_delay = 2[s]  
 Repetition\_time = 2.8388608[s]  
 Temp\_get = 24.8[dc]

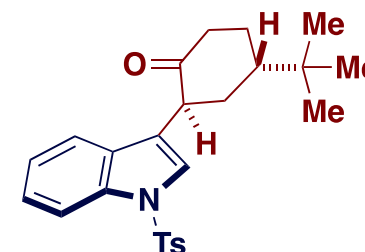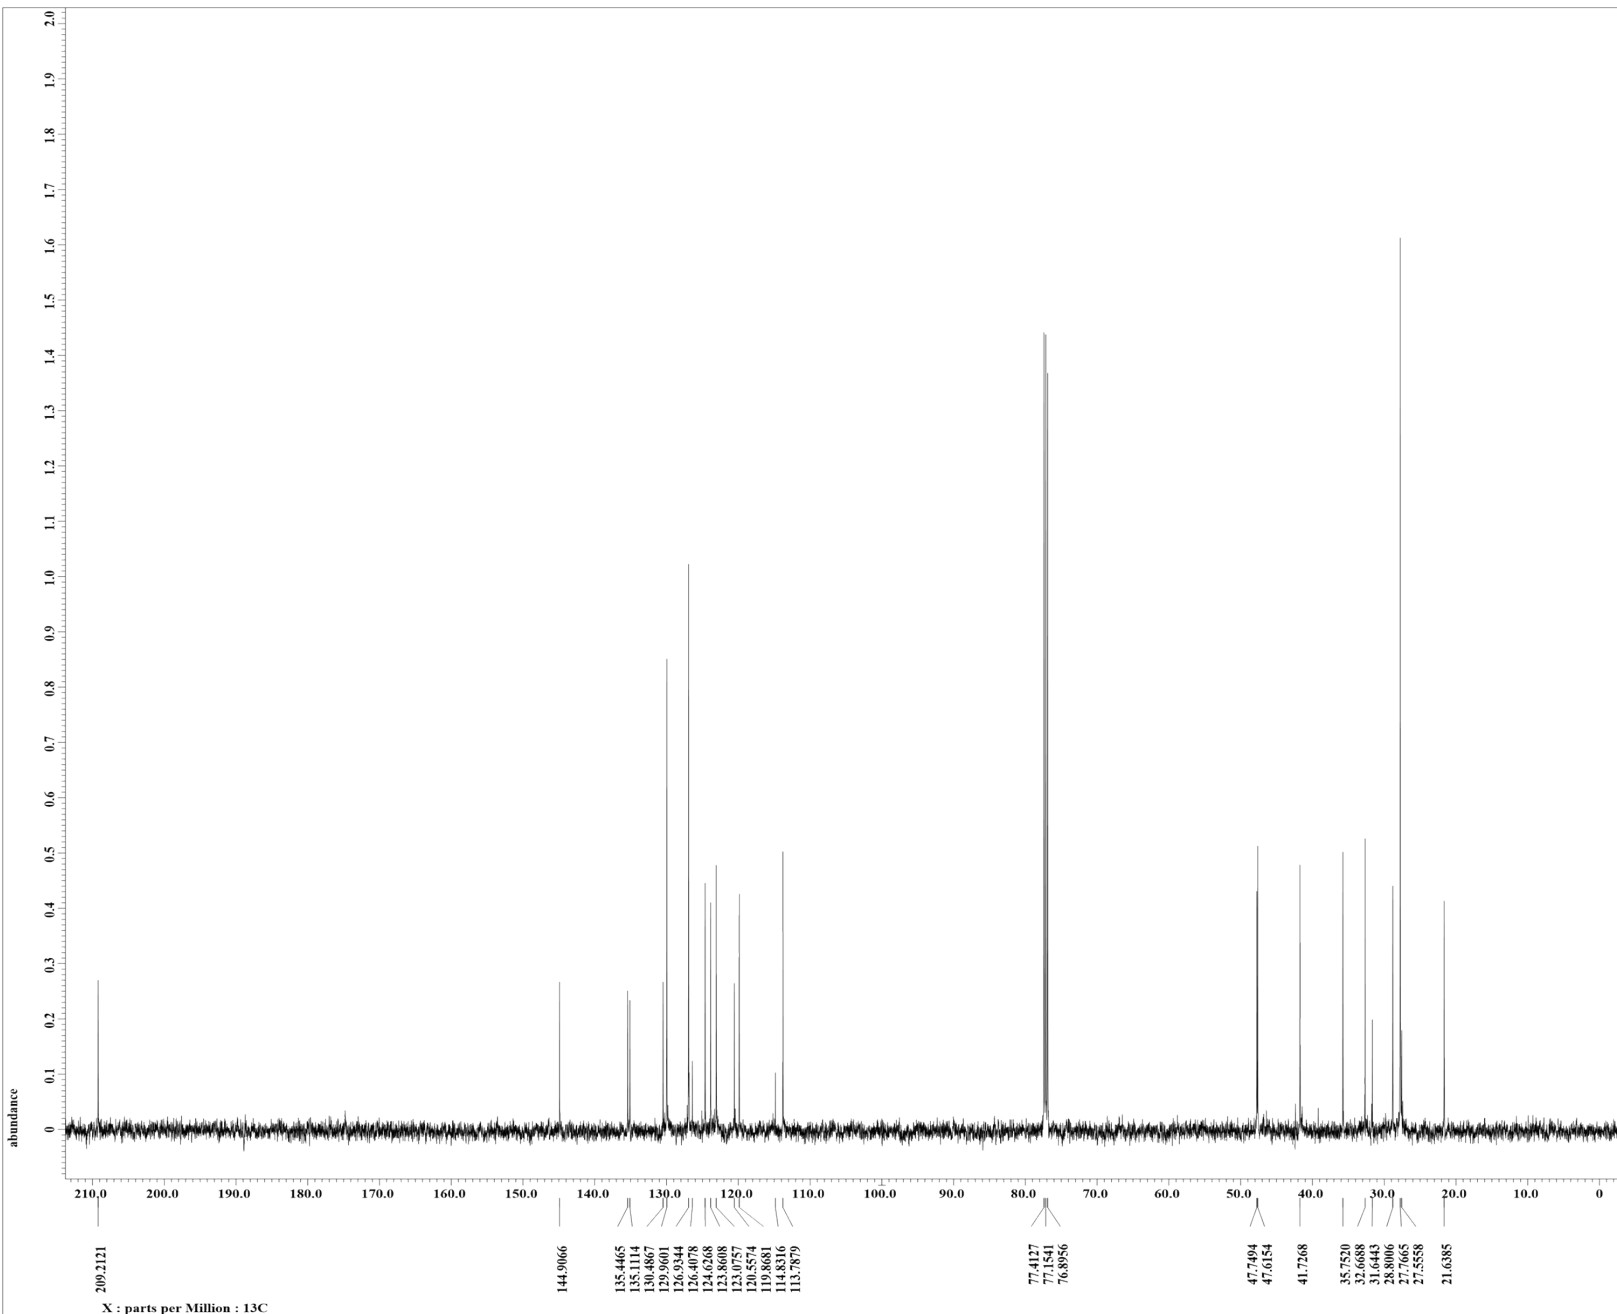

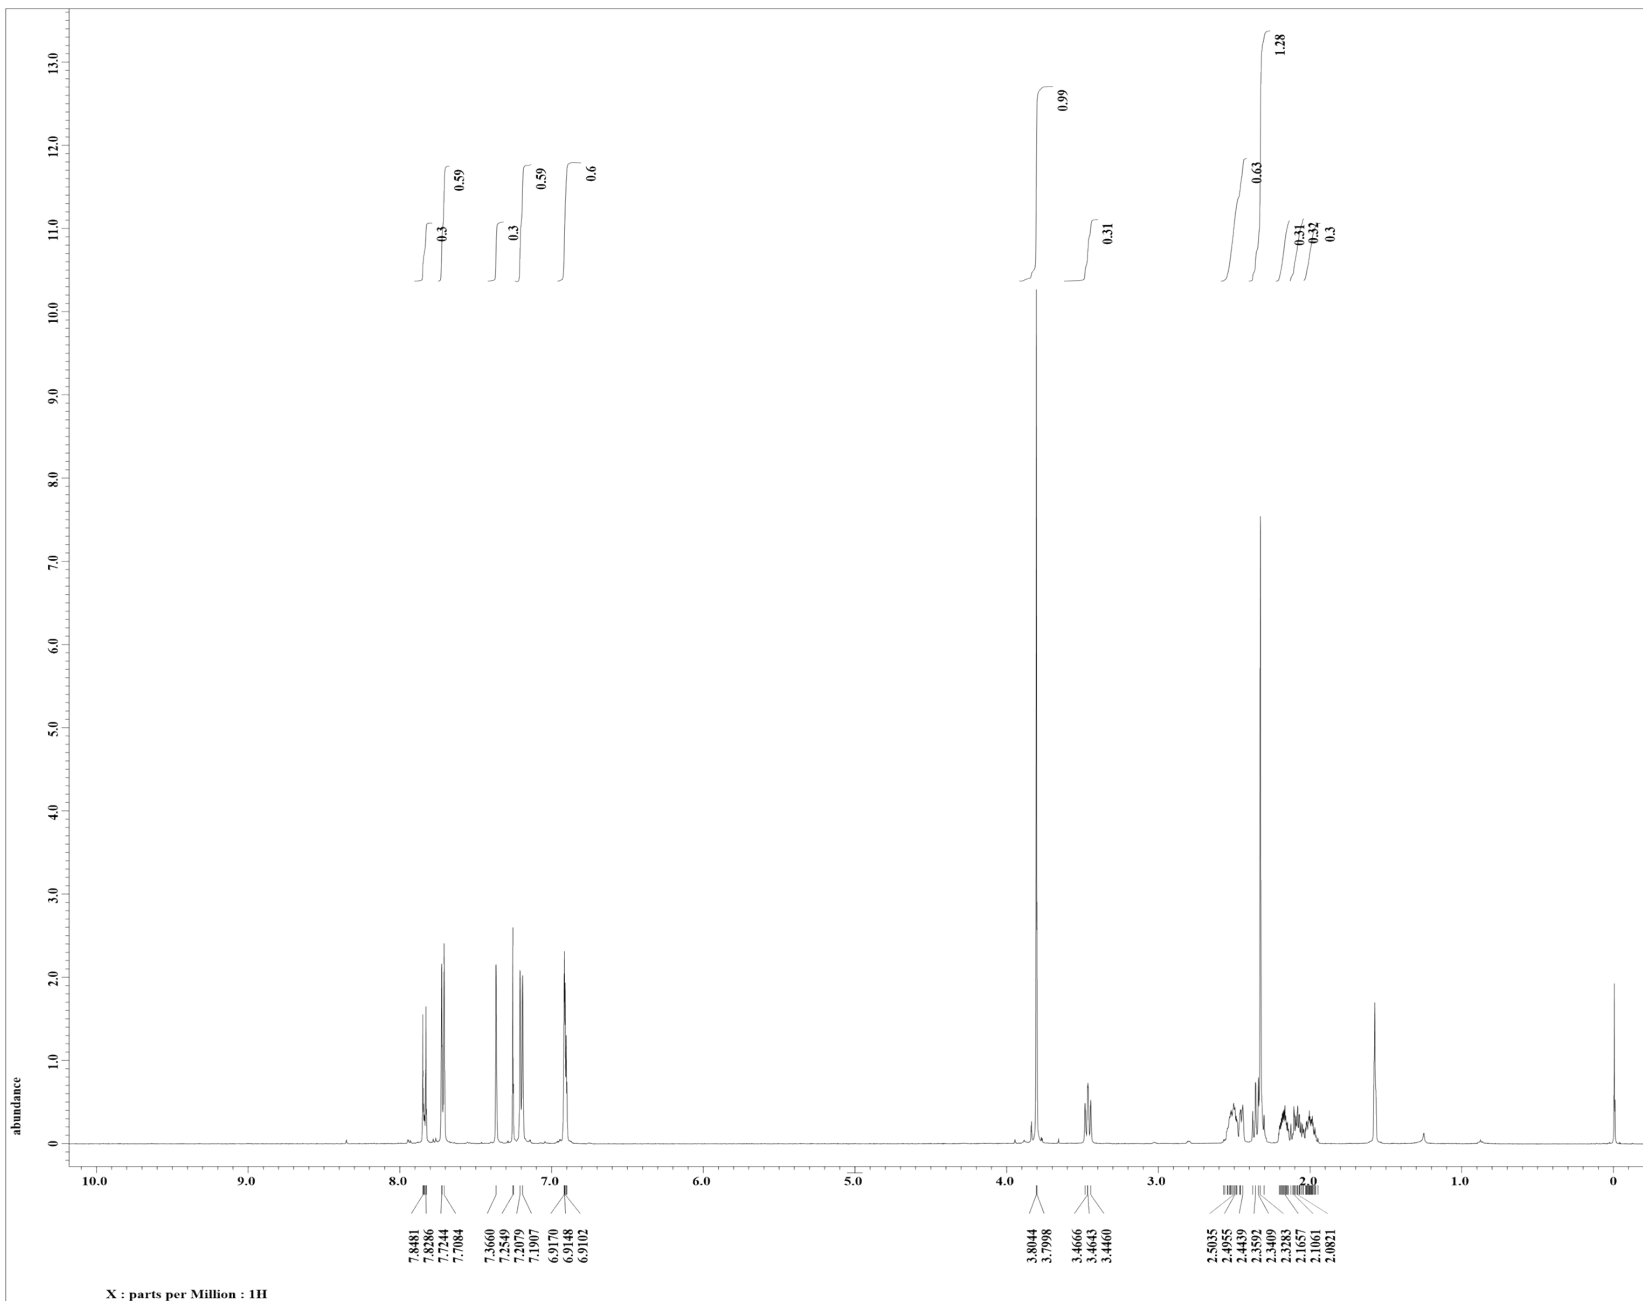



---

----- PROCESSING PARAMETERS -----

```

dc balance : 0 : FALSE
aeXp : 0.2 [Hz] : 0.0 [s]
trapezoid3 : 0 [%] : 60 [%] : 100 [%]
zeroFill : 1
fft : 1 : TRUE : TRUE
machinePhase
ppm
Derived from: 5-MeO-cyclopentanone-1.jdf
  
```

---

|                  |                           |
|------------------|---------------------------|
| Filename         | = 5-MeO-cyclopentanone-   |
| Author           | = delta                   |
| Experiment       | = single pulse.ex2        |
| Sample_id        | = S#434700                |
| Solvent          | = CHLOROFORM-D            |
| Creation_time    | = 4-AUG-2000 13:49:18     |
| Revision_time    | = 19-MAY-2020 12:11:46    |
| Current_time     | = 19-MAY-2020 12:12:19    |
|                  |                           |
| Comment          | = single pulse            |
| Data_format      | = 1D COMPLEX              |
| Dim_Zise         | = 13107                   |
| Dim_title        | = 1H                      |
| Dim_units        | = [ppm]                   |
| Dimensions       | = X                       |
| Site             | = ECA500                  |
| Spectrometer     | = DELTA2_NMR              |
|                  |                           |
| Field_strength   | = 11.7473579 [T] (500 [MH |
| X_acq_duration   | = 1.74587904 [s]          |
| X_domain         | = 1H                      |
| X_freq           | = 500.15991521 [MHz]      |
| X_offset         | = 5.0 [ppm]               |
| X_points         | = 16384                   |
| X_prescans       | = 1                       |
| X_resolution     | = 0.57277737 [Hz]         |
| X_sweep          | = 9.38438438 [kHz]        |
| IFr_domain       | = 1H                      |
| Irr_freq         | = 500.15991521 [MHz]      |
| Irr_offset       | = 5.0 [ppm]               |
| Tri_domain       | = 1H                      |
| Tri_freq         | = 500.15991521 [MHz]      |
| Tri_offset       | = 5.0 [ppm]               |
| Clipped          | = FALSE                   |
| Mod_return       | = 1                       |
| Scans            | = 8                       |
| Total_scans      | = 8                       |
|                  |                           |
| X_90_width       | = 12 [us]                 |
| X_acq_time       | = 1.74587904 [s]          |
| X_angle          | = 45 [deg]                |
| X_atn            | = 3.4 [dB]                |
| X_pulse          | = 6 [us]                  |
| Irr_mode         | = Off                     |
| Tri_mode         | = Off                     |
| Dante_presat     | = FALSE                   |
| Initial_wait     | = 1 [s]                   |
| Recvr_gain       | = 50                      |
| Relaxation_delay | = 5 [s]                   |
| Repetition_time  | = 6.74587904 [s]          |
| Temp_get         | = 22.3 [dC]               |



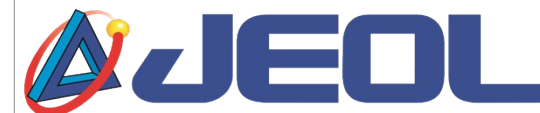

----- PROCESSING PARAMETERS -----  
dc balance : 0 : FALSE  
seXp : 2.0[Hz] : 0.0[s]  
trapezoid3 : 0[%] : 80[%] : 100[%]  
zerofill : 1  
fft : 1 : TRUE : TRUE  
machinephase  
ppm

Derived from: 5-MeO-cyclopentanone-2.jdf

Filename = 5-MeO-cyclopentanone-  
Author = delta  
Experiment = single\_pulse\_dec  
Sample\_id = S#438128  
Solvent = CHLOROFORM-D  
Creation\_time = 4-AUG-2000 15:50:53  
Revision\_time = 19-MAY-2020 14:07:21  
Current\_Time = 19-MAY-2020 14:07:58

Comment = single pulse decouple  
Data\_format = 1D COMPLEX  
Dim\_size = 26214  
Dim\_title = 13C  
Dim\_units = [ppm]  
Dimensions = X  
Site = ECA500  
Spectrometer = DELTA2\_NMR

Field\_strength = 11.7473579[T] (500[MH  
X\_acq\_duration = 0.83361792[s]  
X\_domain = 13C  
X\_freq = 125.76529768[MHz]  
X\_offset = 100[ppm]  
X\_points = 32768  
X\_prescans = 4  
X\_resolution = 1.19959034[Hz]  
X\_sweep = 39.3081761[kHz]  
Irr\_domain = 1H  
Irr\_freq = 500.15991521[MHz]  
Irr\_offset = 5.0[ppm]  
Clipped = FALSE  
Mod\_return = 1  
Scans = 2463  
Total\_scans = 2463

X\_90\_width = 12.8[us]  
X\_acq\_time = 0.83361792[s]  
X\_angle = 30[deg]  
X\_atn = 5.3[dB]  
X\_pulse = 4.26666667[us]  
Irr\_atn\_dec = 21.09[dB]  
Irr\_atn\_noe = 21.09[dB]  
Irr\_noise = WALTZ  
Decoupling = TRUE  
Initial\_wait = 1[s]  
Noe = TRUE  
Noe\_time = 2[s]  
Recvr\_gain = 56  
Relaxation\_delay = 2[s]  
Repetition\_time = 2.83361792[s]  
Temp\_get = 23.3[degC]

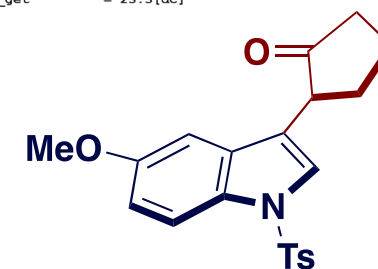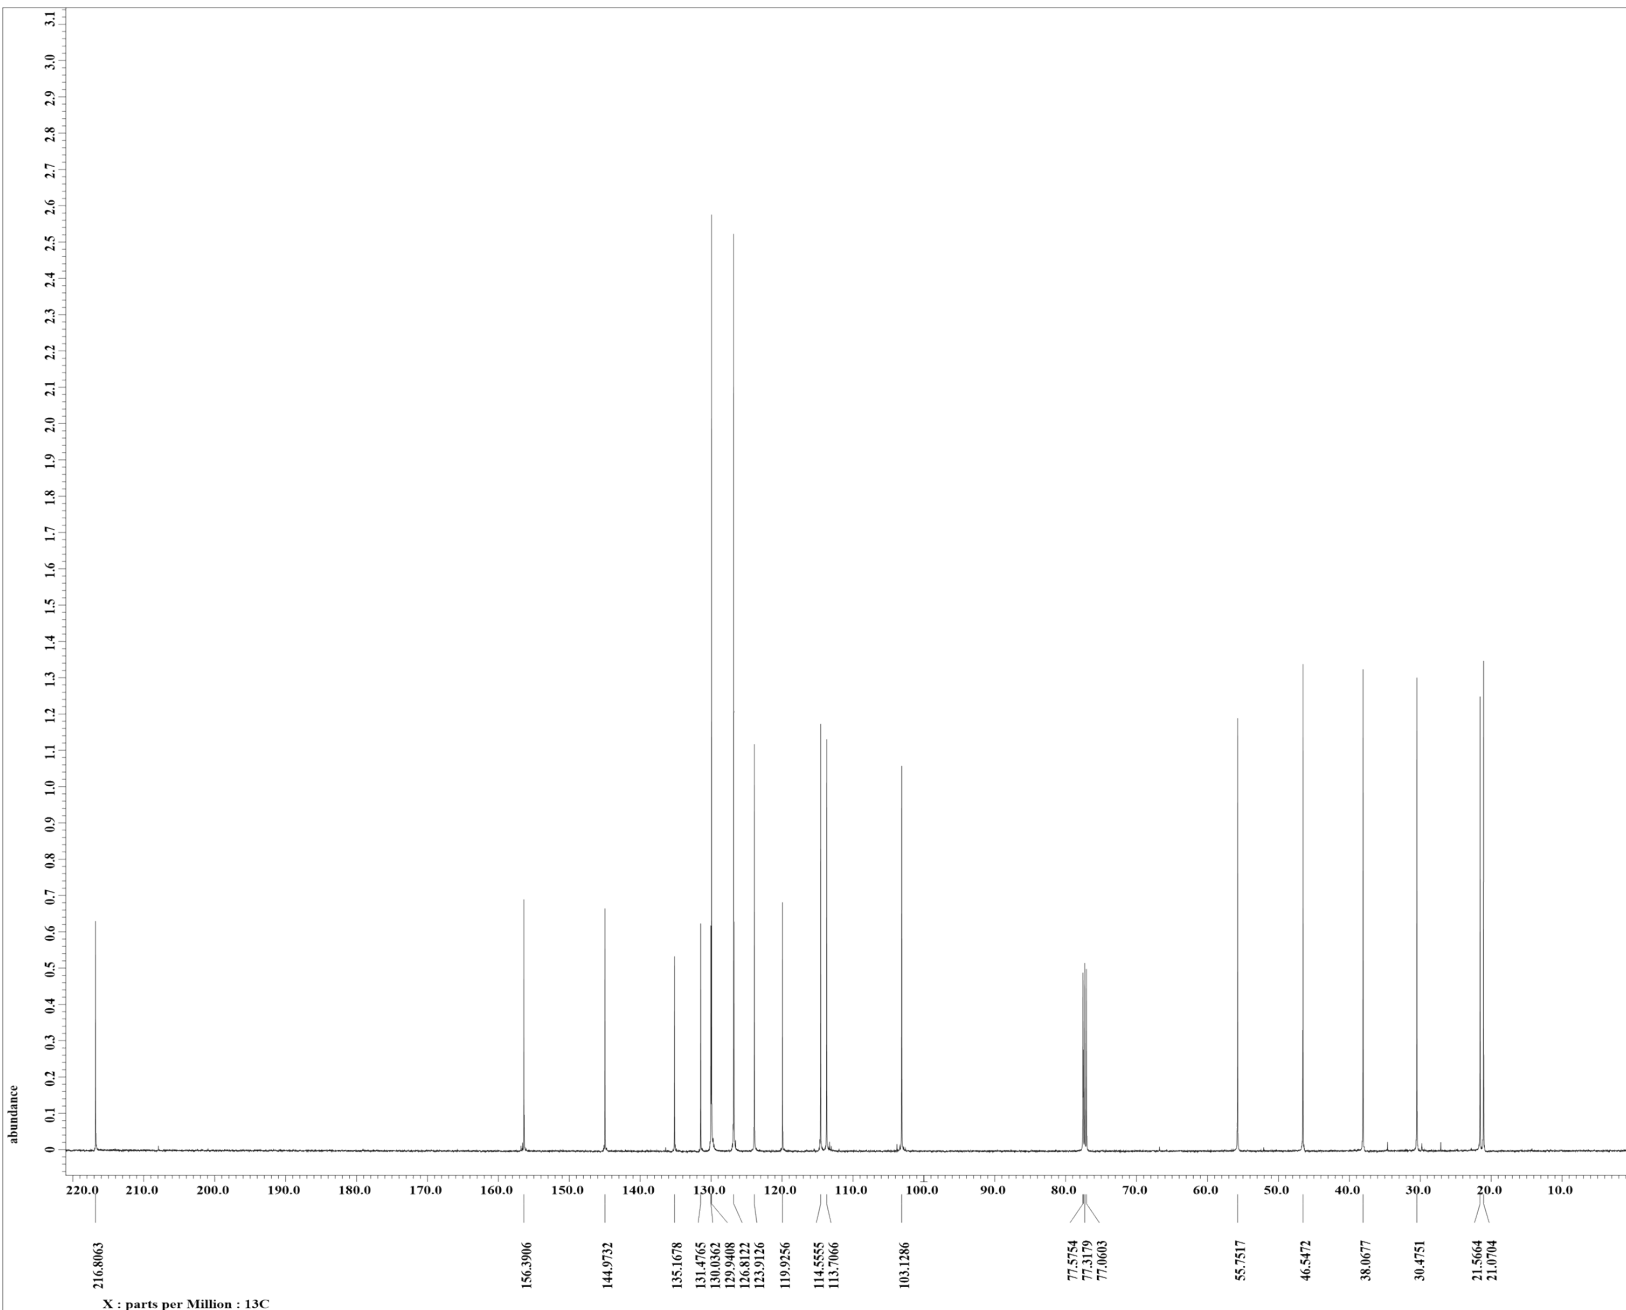

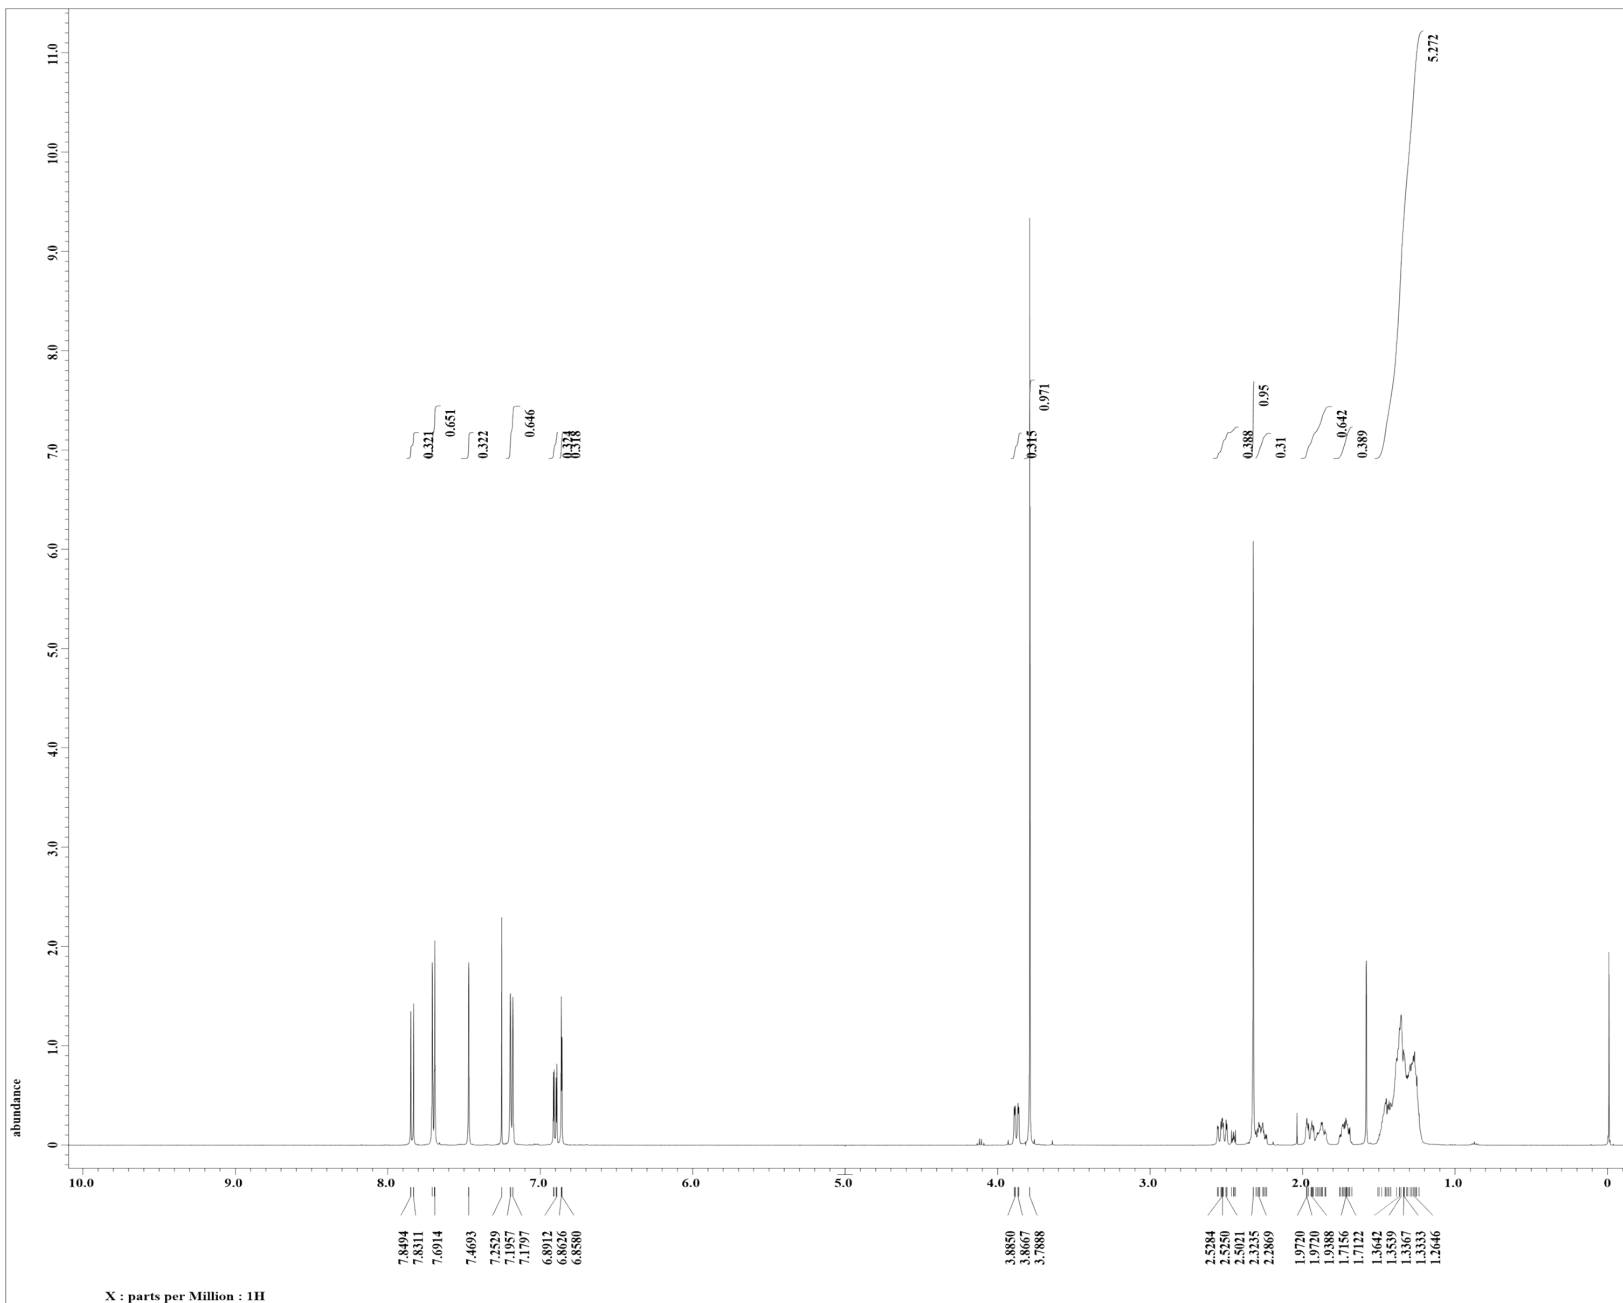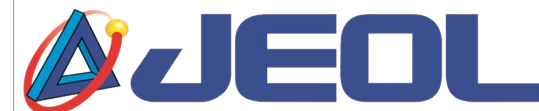

Filename = TA200518-dodecenone-4  
 Author = delta  
 Experiment = single\_pulse.ex2  
 Sample\_id = S#466712  
 Solvent = CHLOROFORM-D  
 Creation\_time = 18-MAY-2020 12:21:29  
 Revision\_time = 18-MAY-2020 13:05:31  
 Current\_time = 18-MAY-2020 13:06:14

Content = single\_pulse  
 Data\_format = 1D\_COMPLEX  
 Dim\_size = 13107  
 Dim\_title = 1H  
 Dim\_units = [ppm]  
 Dimensions = X  
 Site = ECA 500  
 Spectrometer = DELTA2\_NMR

Field\_strength = 11.62926421[T] (500[M]  
 X\_acq\_duration = 1.76422912[s]  
 X\_domain = 1H  
 X\_freq = 495.13191398[MHz]  
 X\_offset = 5[ppm]  
 X\_points = 16384  
 X\_prescans = 1  
 X\_resolution = 0.5668198[Hz]  
 X\_sweep = 9.28677563[kHz]  
 Irr\_domain = 1H  
 Irr\_freq = 495.13191398[MHz]  
 Irr\_offset = 5[ppm]  
 Tri\_domain = 1H  
 Tri\_freq = 495.13191398[MHz]  
 Tri\_offset = 5[ppm]  
 Clipped = FALSE  
 Mod\_return = 1  
 Scans = 8  
 Total\_scans = 8

X\_90\_width = 11.3[us]  
 X\_acq\_time = 1.76422912[s]  
 X\_angle = 45[deg]  
 X\_atn = 3.3[dB]  
 X\_pulse = 5.65[us]  
 Irr\_mode = Off  
 Tri\_mode = Off  
 Dante\_presat = FALSE  
 Initial\_wait = 1[s]  
 Recvr\_gain = 42  
 Relaxation\_delay = 5[s]  
 Repetition\_time = 6.76422912[s]  
 Temp\_get = 22.9[degC]

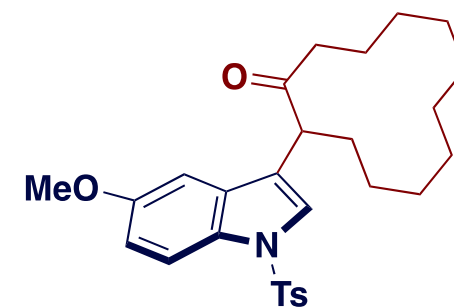

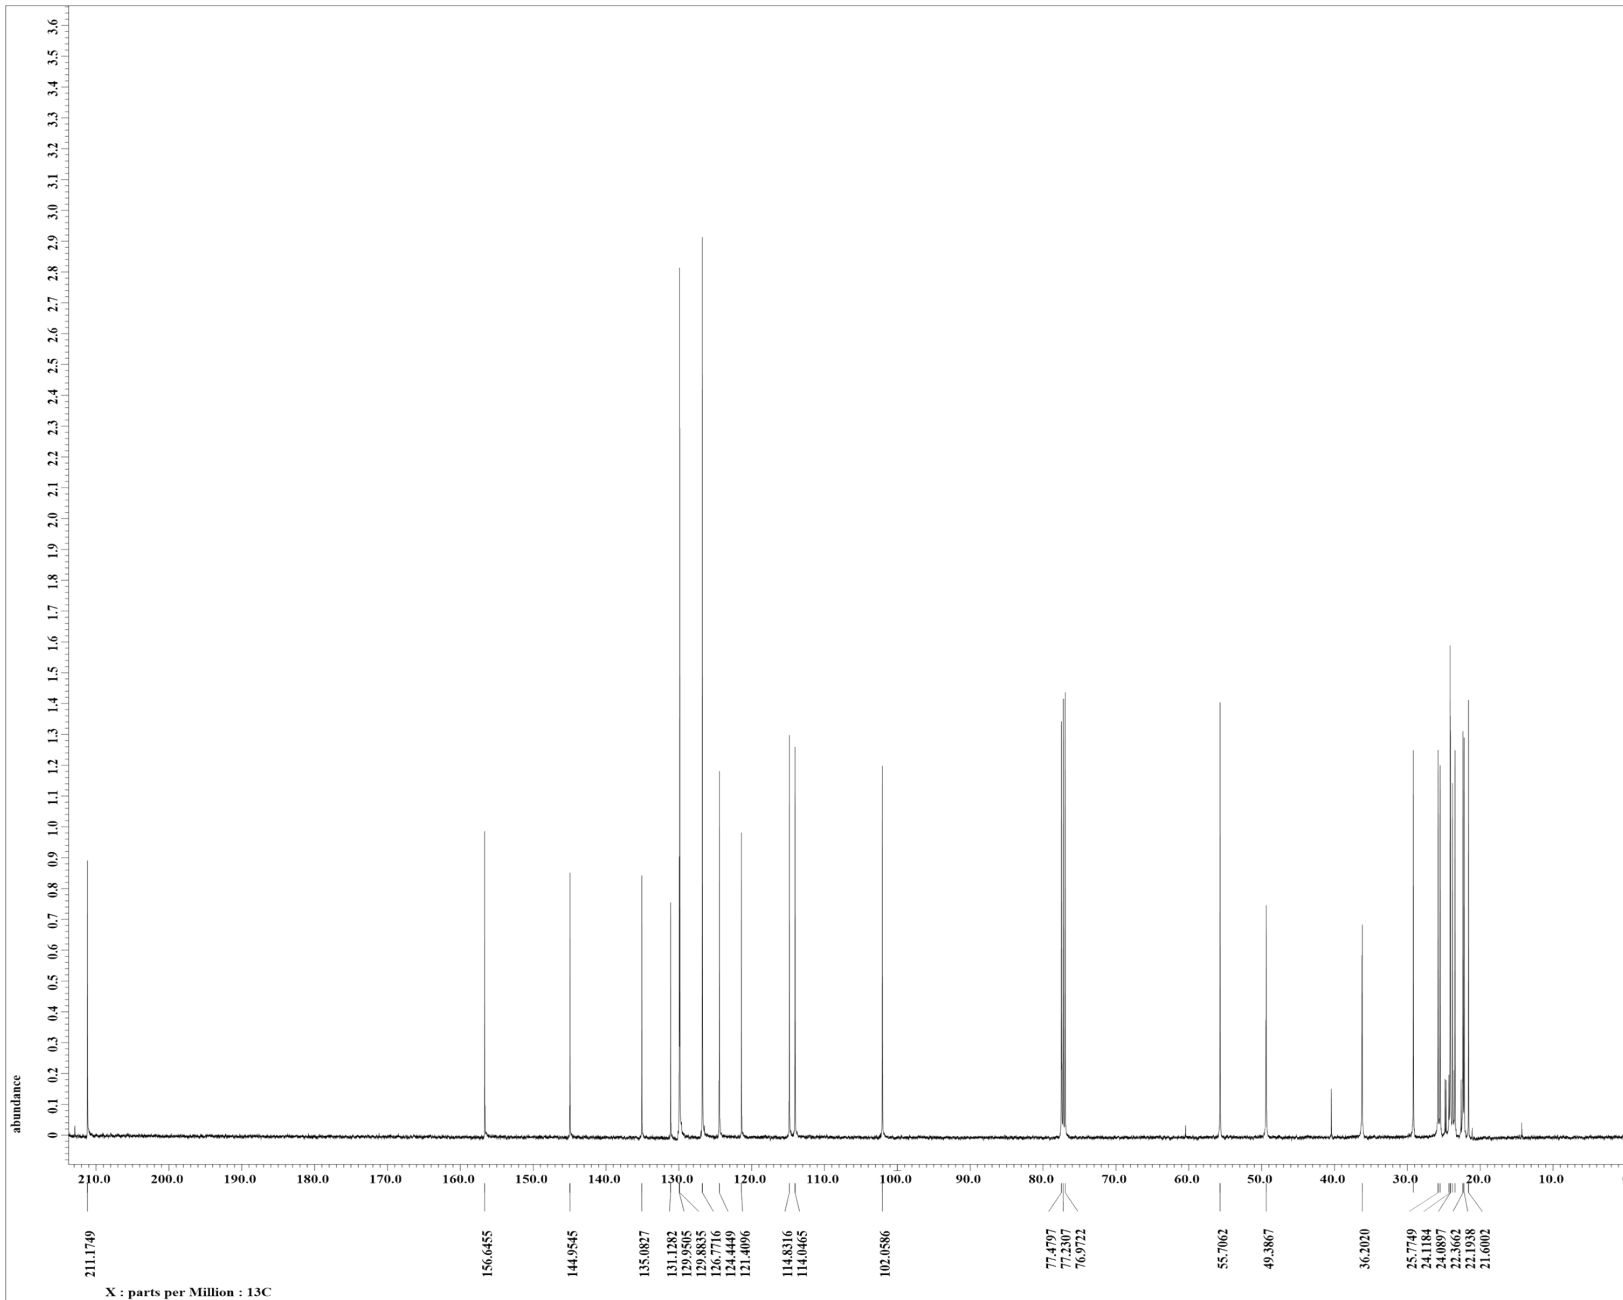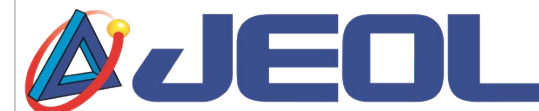

```

Filename      = TA200518-dodecenone-4
Author       = delta
Experiment    = single_pulse_dec
Sample_id    = S#470475
Solvent      = CHLOROFORM-D
Creation_time = 18-MAY-2020 13:38:48
Revision_time = 18-MAY-2020 14:17:36
Current_time  = 18-MAY-2020 14:18:19

Content       = single pulse decouple
Data_format   = 1D COMPLEX
Dim_size      = 26214
Dim_title     = 13C
Dim_units     = [ppm]
Dimensions    = X
Site          = ECA 500
Spectrometer  = DELTA2_NMR

Field_strength = 11.62926421[T] (500[M]
X_acq_duration = 0.8388608[s]
X_domain       = 13C
X_freq         = 124.5010059[MHz]
X_offset       = 100[ppm]
X_points       = 32768
X_prescans     = 4
X_resolution   = 1.1920929[Hz]
X_sweep        = 39.0625[kHz]
Irr_domain     = 1H
Irr_freq       = 495.13191398[MHz]
Irr_offset     = 5[ppm]
Clipped        = FALSE
Mod_return     = 1
Scans          = 1518
Total_scans    = 1518

X_90_width    = 10.1[us]
X_acq_time     = 0.8388608[s]
X_angle        = 30[deg]
X_atn          = 9.5[dB]
X_pulse        = 3.36666667[us]
Irr_atn_dec    = 21.51[dB]
Irr_atn_noe    = 21.51[dB]
Irr_noise      = WALTZ
Decoupling     = TRUE
Initial_wait   = 1[s]
Noe            = TRUE
Noe_time       = 2[s]
RecVr_gain     = 60
Relaxation_delay = 2[s]
Repetition_time = 2.8388608[s]
Temp_get       = 24.2[degC]
  
```

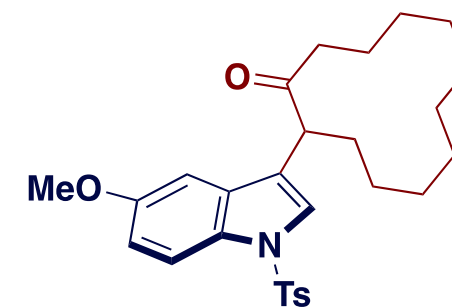



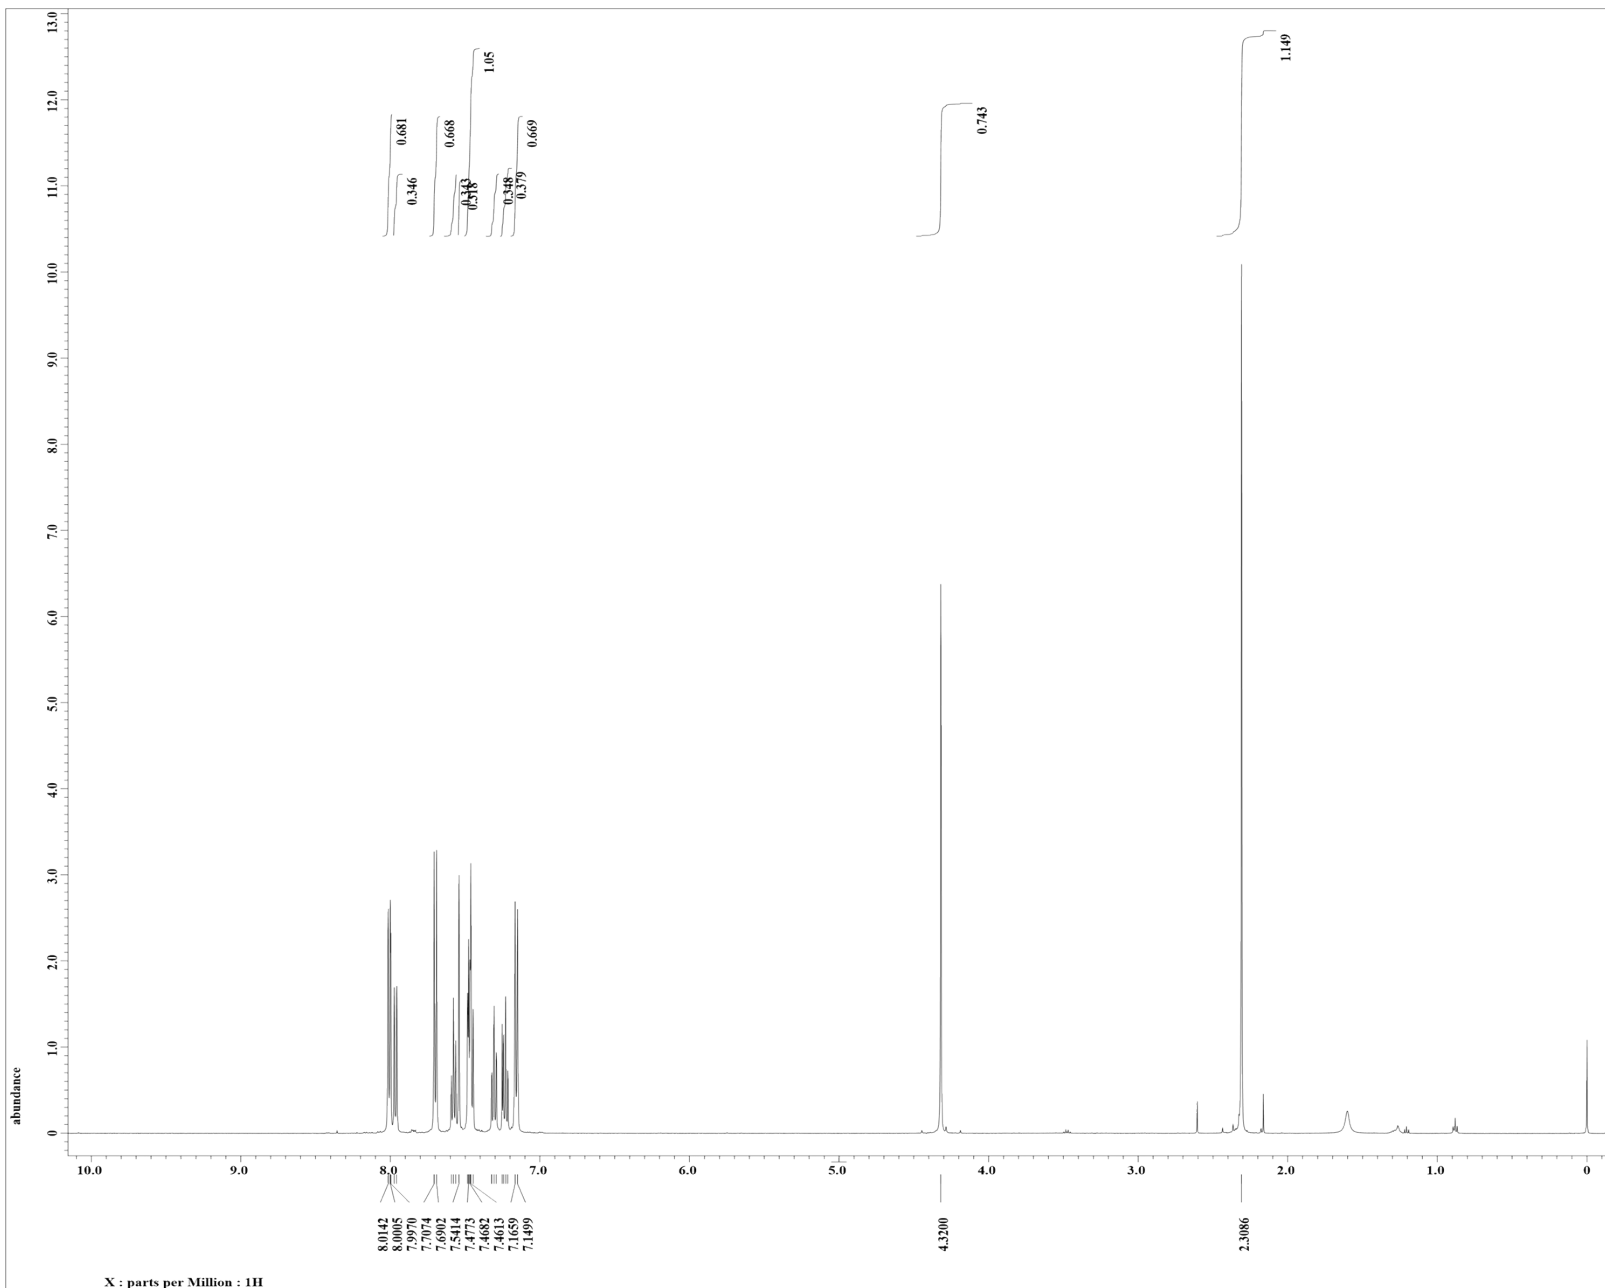



---

```

Filename      = TA200529-acetophenone
Author       = delta
Experiment   = single pulse.ex2
Sample_id    = S#479939
Solvent      = CHLOROFORM-D
Creation_time = 29-MAY-2020 12:41:47
Revision_time = 29-MAY-2020 13:24:21
Current_Time  = 29-MAY-2020 13:24:52

Content      = single pulse
Data_format  = 1D COMPLEX
Dim_size     = 13107
Dim_title    = 1H
Dim_units    = [ppm]
Dimensions   = X
Site         = ECA 500
Spectrometer = DELTA2_NMR

Field_strength = 11.62926421 [T] (500 [M
X_acq_duration = 1.76422912 [s]
X_domain       = 1H
X_freq         = 495.13191398 [MHz]
X_offset       = 5 [ppm]
X_points       = 16384
X_prescans     = 1
X_resolution   = 0.5668198 [Hz]
X_sweep        = 9.28677563 [kHz]
iTr_domain     = 1H
iTr_freq       = 495.13191398 [MHz]
iTr_offset     = 5 [ppm]
Tri_domain     = 1H
Tri_freq       = 495.13191398 [MHz]
Tri_offset     = 5 [ppm]
Clipped        = FALSE
Mod_return     = 1
Scans          = 8
Total_scans    = 8

X_90_width    = 11.3 [us]
X_acq_time     = 1.76422912 [s]
X_angle        = 45 [deg]
X_atn          = 3.3 [dB]
X_pulse        = 5.65 [us]
iTr_mode       = Off
Tri_mode       = Off
Dante_preset   = FALSE
Initial_wait   = 1 [s]
Recvr_gain     = 42
Relaxation_delay = 5 [s]
Repetition_time = 6.76422912 [s]
Temp_get       = 24 [dC]
  
```



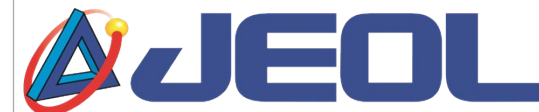

Filename = TA200529-acetophenone  
Author = delta  
Experiment = single\_pulse\_dec  
Sample\_id = S#481313  
Solvent = CHLOROFORM-D  
Creation\_time = 29-MAY-2020 16:53:55  
Revision\_time = 29-MAY-2020 17:35:45  
Current\_time = 29-MAY-2020 17:36:14  
Content = Ts-acetophenone-2  
Data\_format = 1D\_COMPLEX  
Dim\_size = 26214  
Dim\_title = 13C  
Dim\_units = [ppm]  
Dimensions = X  
Site = ECA 500  
Spectrometer = DELTA2\_NMR  
Field\_strength = 11.62926421[T] (500[M]  
X\_acq\_duration = 0.8398608[s]  
X\_domain = 13C  
X\_freq = 124.5010059[MHz]  
X\_offset = 100[ppm]  
X\_points = 32768  
X\_prescans = 4  
X\_resolution = 1.1920929[Hz]  
X\_sweep = 39.0625[kHz]  
Irr\_domain = 1H  
Irr\_freq = 495.13191398[MHz]  
Irr\_offset = 5[ppm]  
Clipped = FALSE  
Mod\_return = 1  
Scans = 5297  
Total\_scans = 5297  
X\_90\_width = 10.1[us]  
X\_acq\_time = 0.8398608[s]  
X\_angle = 30[deg]  
X\_atn = 9.5[dB]  
X\_pulse = 3.36666667[us]  
Irr\_atn\_dec = 21.51[dB]  
Irr\_atn\_noe = 21.51[dB]  
Irr\_noise = WALTZ  
Decoupling = TRUE  
Initial\_wait = 1[s]  
Noe = TRUE  
Noe\_time = 2[s]  
Recvr\_gain = 60  
Relaxation\_delay = 2[s]  
Repetition\_time = 2.8398608[s]  
Temp\_get = 25[dc]

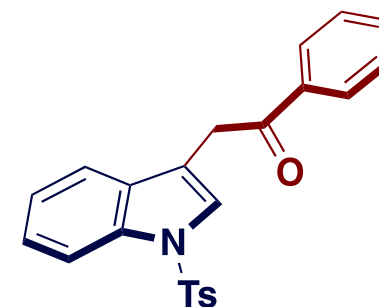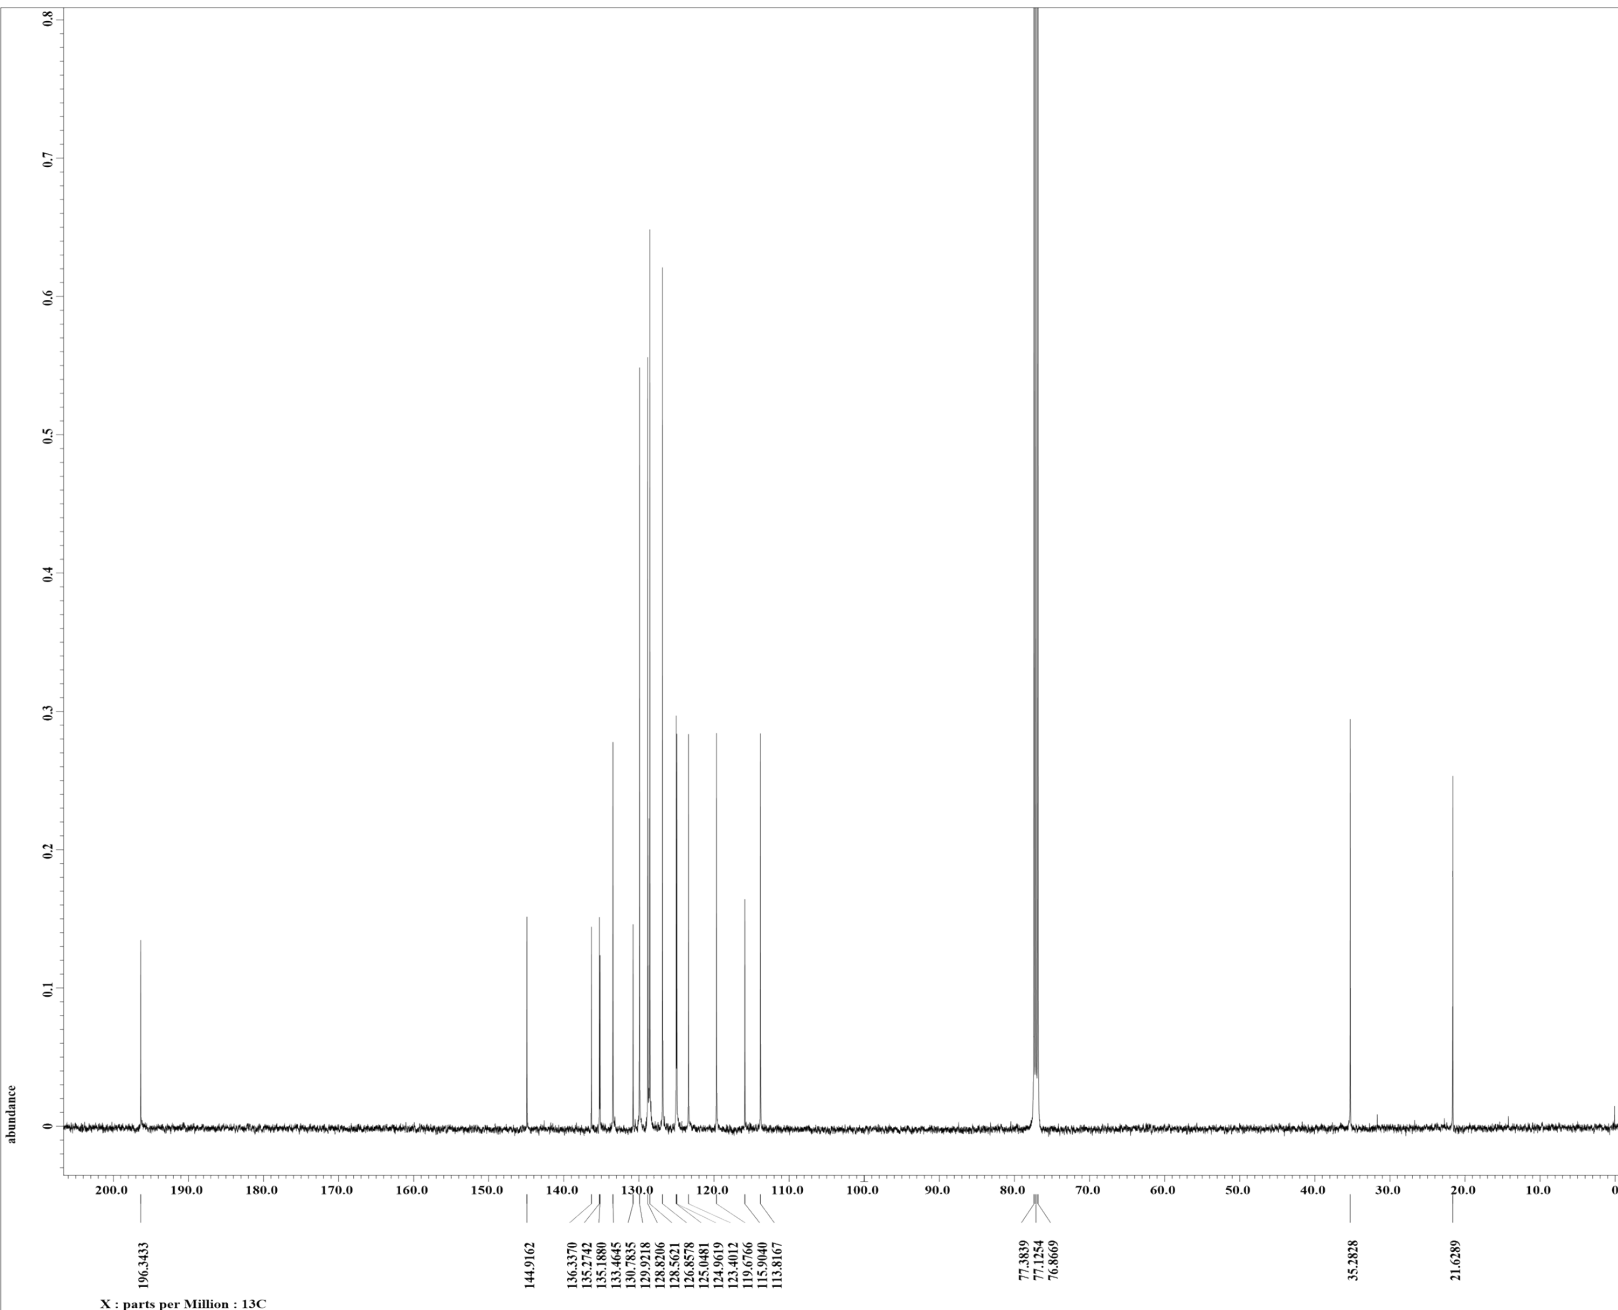

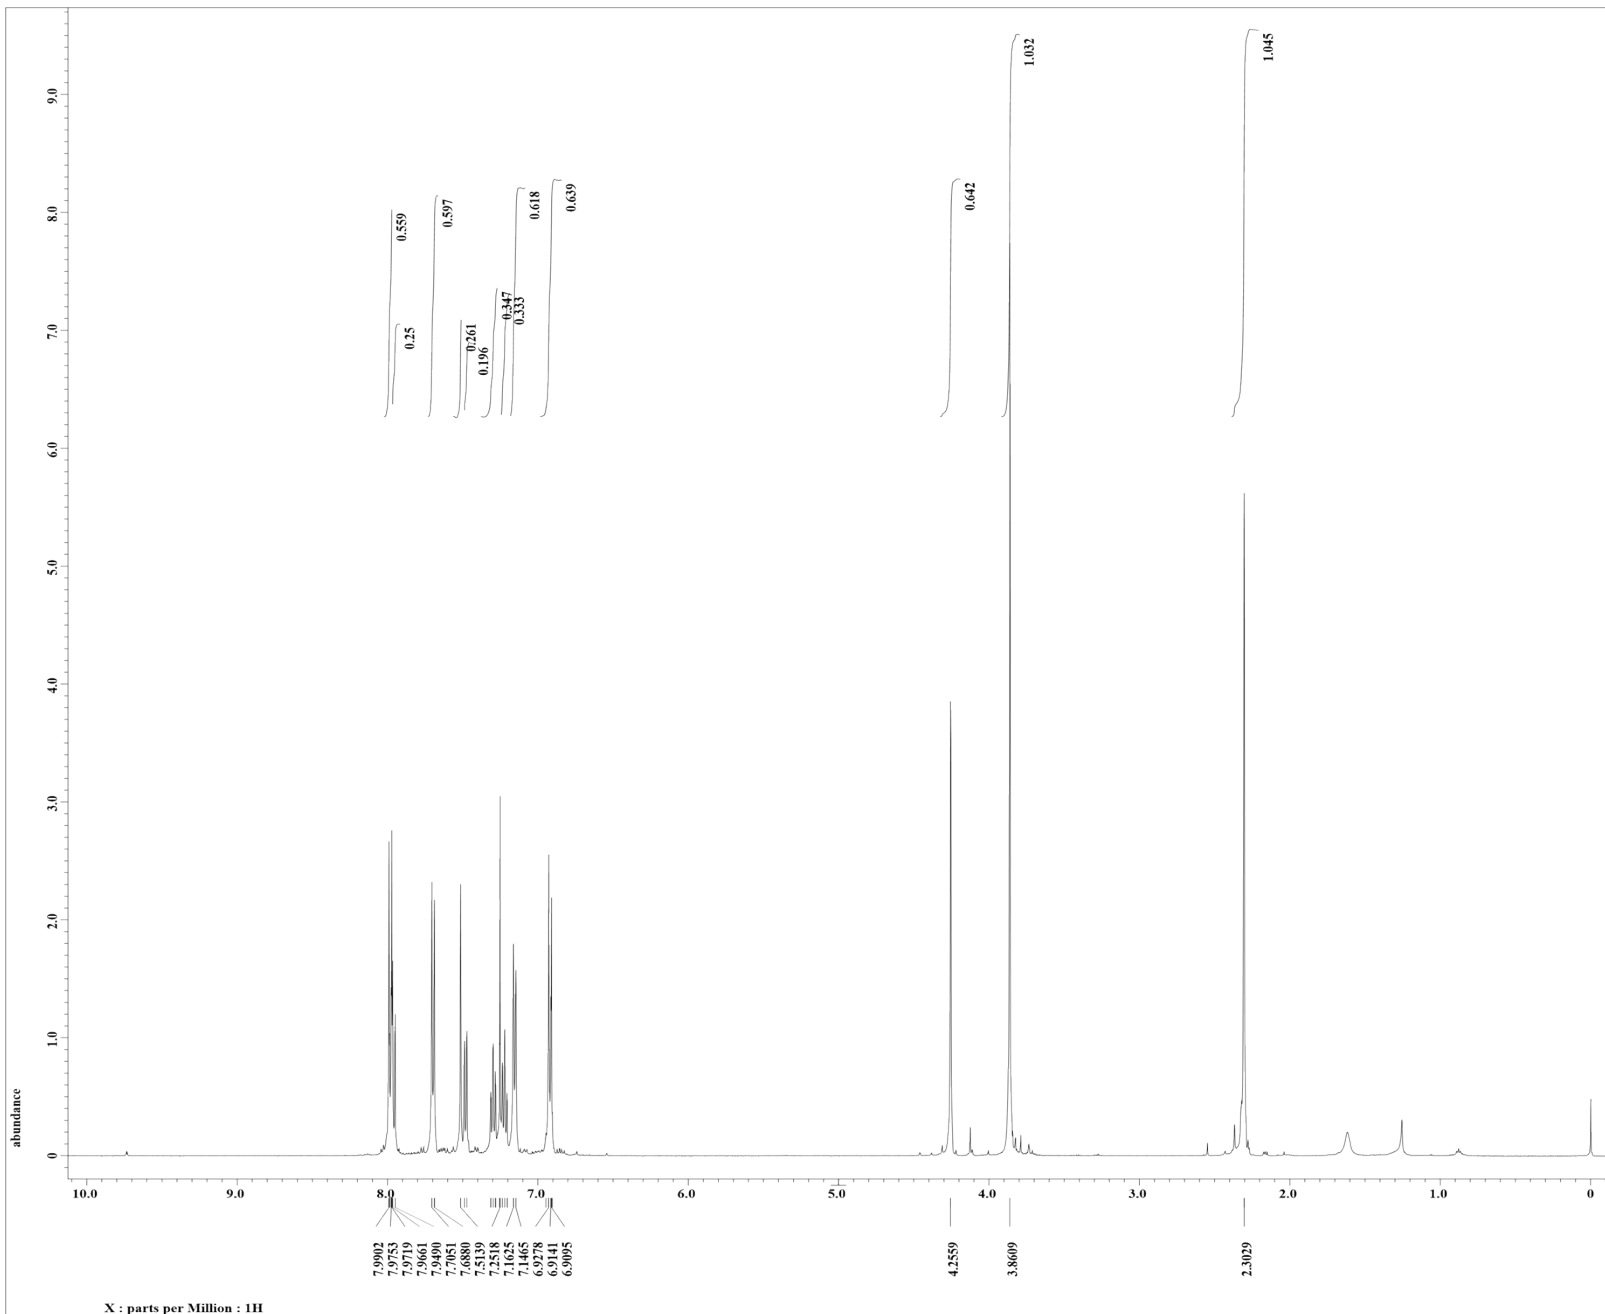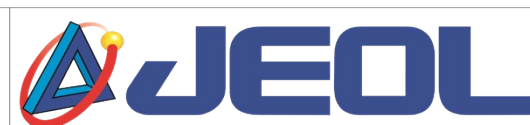

Filename = Ta200603-5H-4-MeO-ace  
 Author = delta  
 Experiment = single pulse.ex2  
 Sample id = 3#297984  
 Solvent = CHLOROFORM-D  
 Creation time = 3-JUN-2020 07:37:48  
 Revision time = 3-JUN-2020 08:23:33  
 Current time = 3-JUN-2020 08:24:26

Content = single pulse  
 Data format = 1D COMPLEX  
 Dim size = 13107  
 Dim title = 1H  
 Dim units = [ppm]  
 Dimensions = X  
 Site = ECA 500  
 Spectrometer = DELTA2\_NMR

Field strength = 11.62926421[T] (500[M]  
 X acq duration = 1.76422912[s]  
 X domain = 1H  
 X freq = 495.13191398[MHz]  
 X offset = 5[ppm]  
 X points = 16384  
 X prescans = 1  
 X resolution = 0.5668198[MHz]  
 X sweep = 9.28677563[kHz]  
 IPr domain = 1H  
 Irr freq = 495.13191398[MHz]  
 Irr offset = 5[ppm]  
 Tri domain = 1H  
 Tri freq = 495.13191398[MHz]  
 Tri offset = 5[ppm]  
 Clipped = FALSE  
 Mod return = 1  
 Scans = 8  
 Total scans = 8

X 90 width = 11.3[us]  
 X acq time = 1.76422912[s]  
 X angle = 45[deg]  
 X attn = 3.3[dB]  
 X pulse = 5.65[us]  
 Irr mode = Off  
 Tri mode = Off  
 DanTe presat = FALSE  
 Initial wait = 1[s]  
 Recvr gain = 40  
 Relaxation delay = 5[s]  
 Repetition time = 6.76422912[s]  
 Temp\_get = 24.7[dc]

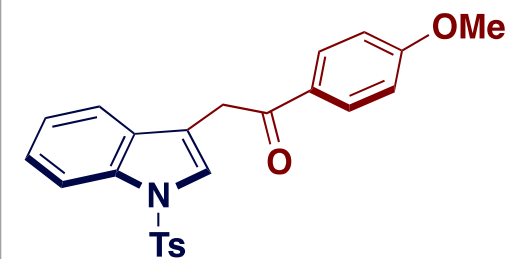

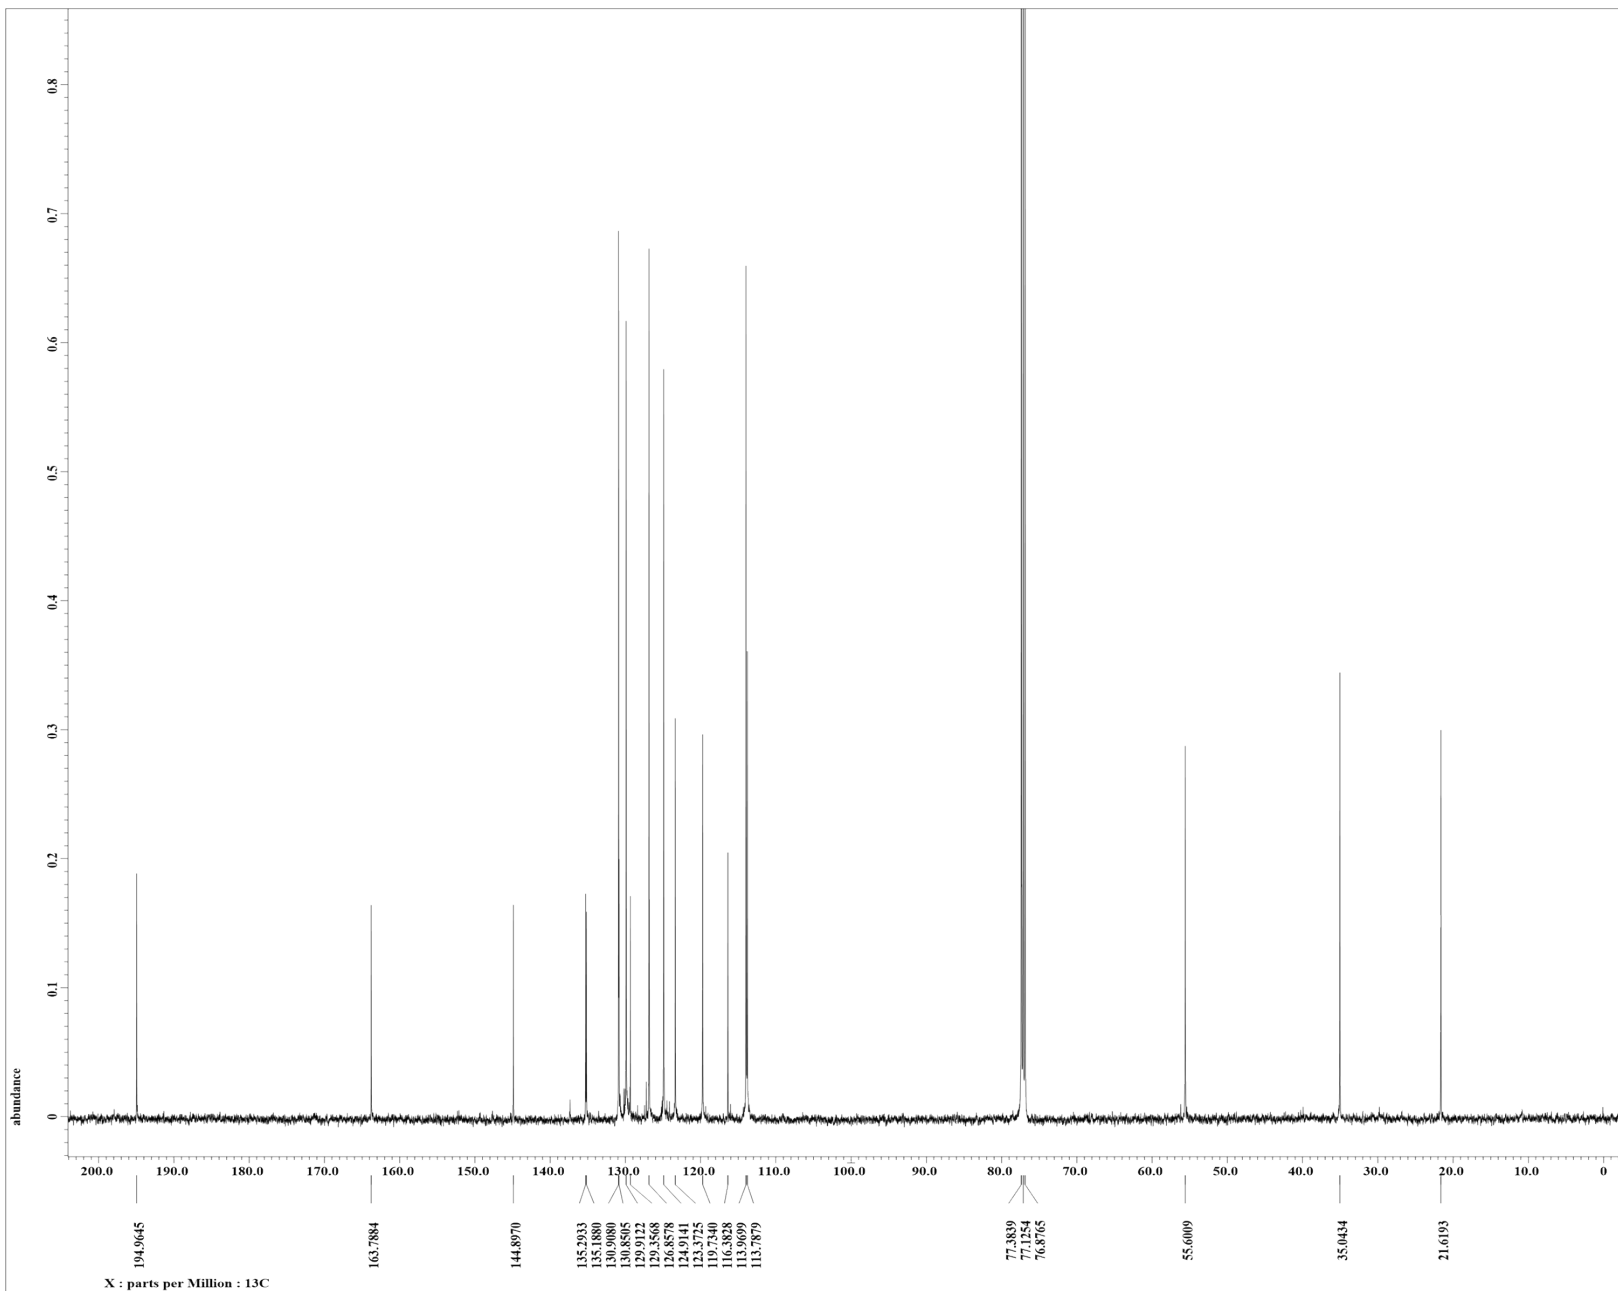


```

Filename      = Ta200603-5H-4-MeO-ace
Author       = delta
Experiment   = single_pulse_dec
Sample_id    = S#607425
Solvent      = CHLOROFORM-D
Creation_time = 3-JUN-2020 18:50:13
Revision_time = 3-JUN-2020 19:33:21
Current_time  = 3-JUN-2020 19:33:58

Content       = single pulse decouple
Data_format   = 1D COMPLEX
Dim_size      = 26214
Dim_title     = 13C
Dim_units     = [ppm]
Dimensions    = X
Site          = ECA 500
Spectrometer  = DELTA2_NMR

Field_strength = 11.62926421 [T] (500 [M
X_acq_duration = 0.8388608 [s]
X_domain       = 13C
X_freq         = 124.5010059 [MHz]
X_offset       = 100 [ppm]
X_points       = 32768
X_prescans     = 4
X_resolution   = 1.1920929 [Hz]
X_sweep        = 39.0625 [kHz]
Irr_domain     = 1H
Irr_freq       = 495.13191398 [MHz]
Irr_offset     = 5 [ppm]
Clipped        = FALSE
Mod_return     = 1
Scans          = 3329
Total_scans    = 3329

X_90_width     = 10.1 [us]
X_acq_time     = 0.8388608 [s]
X_angle        = 30 [deg]
X_atn          = 9.5 [dB]
X_pulse        = 3.36666667 [us]
Irr_atn_dec    = 21.51 [dB]
Irr_atn_noe    = 21.51 [dB]
Irr_noise      = WAIT2
Decoupling     = TRUE
Initial_wait   = 1 [s]
Noe            = TRUE
Noe_time       = 2 [s]
Recvr_gain     = 60
Relaxation_delay = 2 [s]
Repetition_time = 2.8388608 [s]
Temp_get       = 25.2 [dc]
  
```



Chemical structure: 1-(4-methoxyphenyl)-2-(1-(4-methoxyphenyl)-1H-indol-3-yl)ethan-1-one

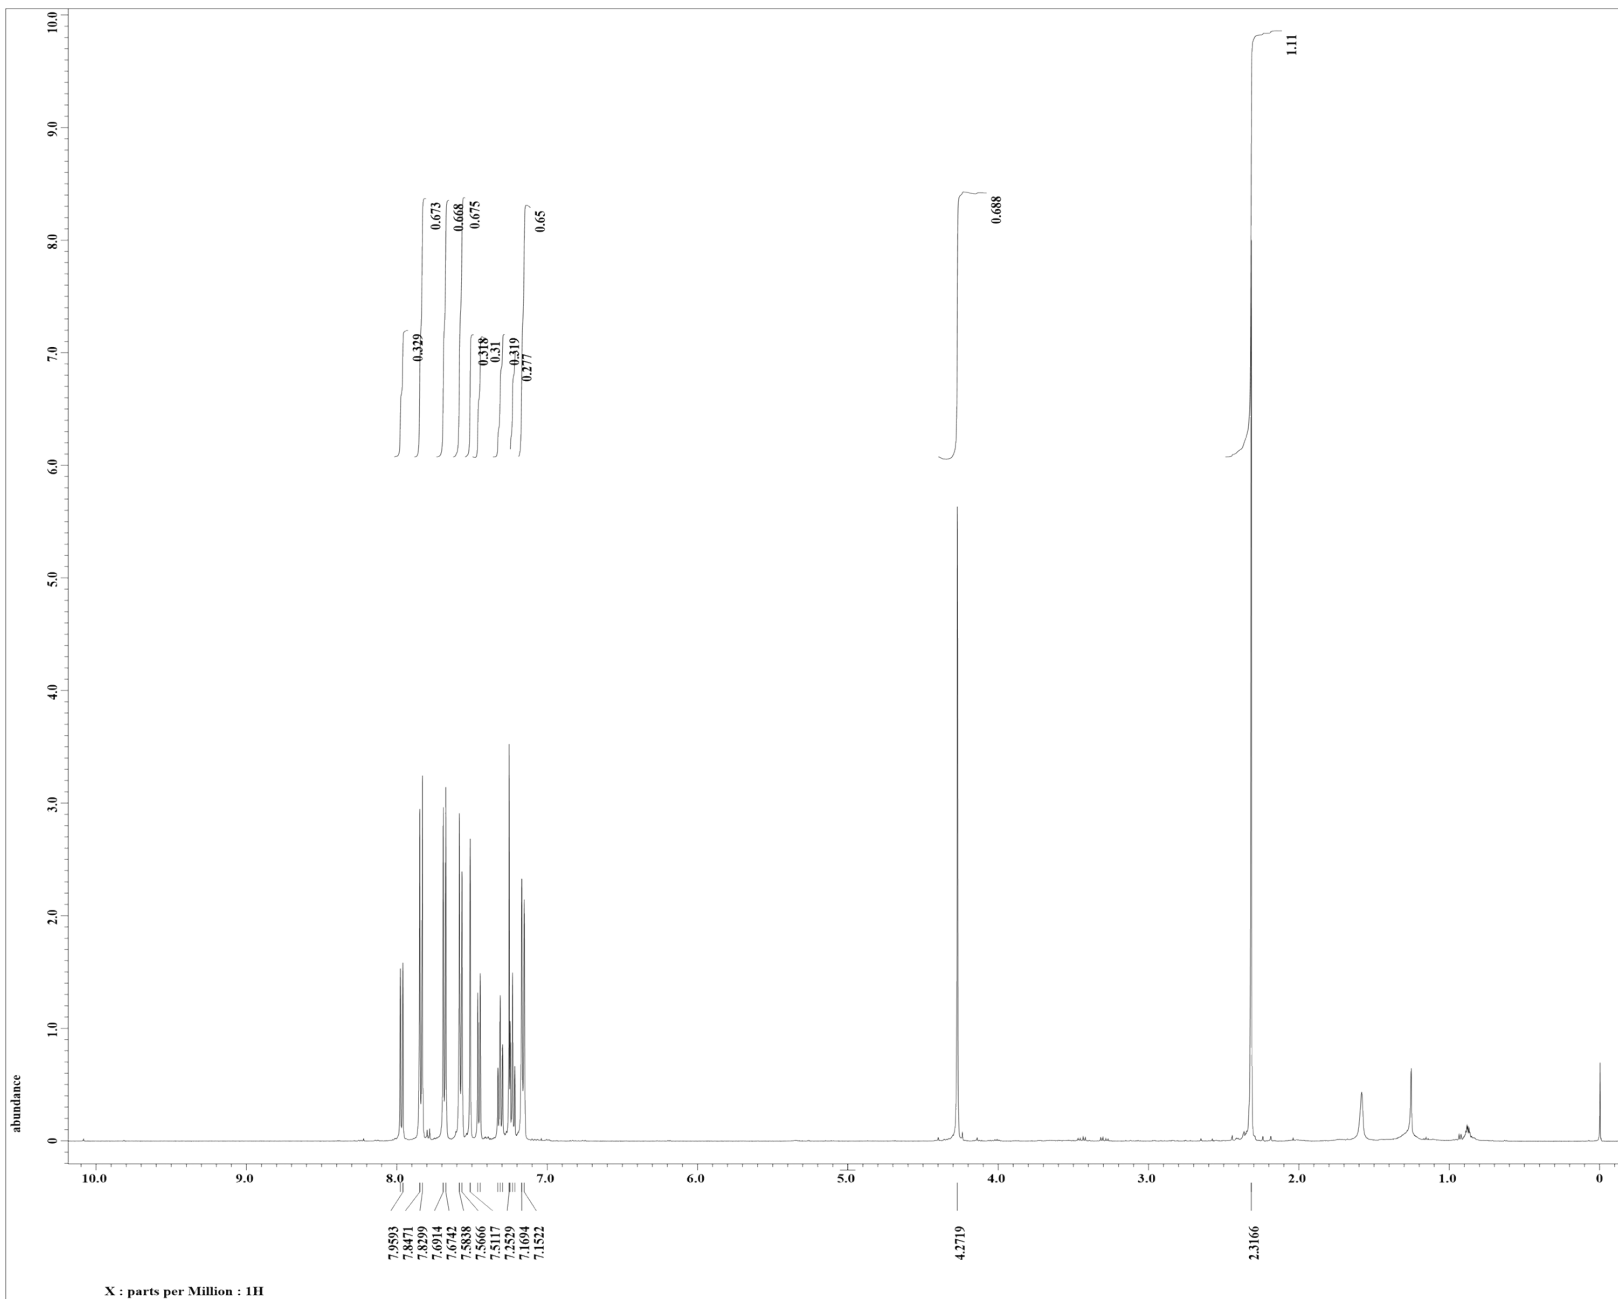



Filename = Ta200603-5H-4\_Br-acet  
 Author = delta  
 Experiment = single\_pulse.ex2  
 Sample\_id = #307584  
 Solvent = CHLOROFORM-D  
 Creation\_time = 4-JUN-2020 07:53:38  
 Revision\_time = 4-JUN-2020 08:36:51  
 Current\_time = 4-JUN-2020 08:37:20

Content = single\_pulse  
 Data\_format = 1D COMPLEX  
 Dim\_size = 13107  
 Dim\_title = 1H  
 Dim\_units = [ppm]  
 Dimensions = X  
 Site = ECA 500  
 Spectrometer = DELTA2\_NMR

Field\_strength = 11.62926421[T] (500[M]  
 X\_acq\_duration = 1.76422912[s]  
 X\_domain = 1H  
 X\_freq = 495.13191398[MHz]  
 X\_offset = 5[ppm]  
 X\_points = 16384  
 X\_prescans = 1  
 X\_resolution = 0.5668198[Hz]  
 X\_sweep = 9.28677563[kHz]  
 Irr\_domain = 1H  
 Irr\_freq = 495.13191398[MHz]  
 Irr\_offset = 5[ppm]  
 Tri\_domain = 1H  
 Tri\_freq = 495.13191398[MHz]  
 Tri\_offset = 5[ppm]  
 Clipped = FALSE  
 Mod\_return = 1  
 Scans = 8  
 Total\_scans = 8

X\_90\_width = 11.3[us]  
 X\_acq\_time = 1.76422912[s]  
 X\_angle = 45[deg]  
 X\_atn = 3.3[dB]  
 X\_pulse = 5.65[us]  
 Irr\_mode = Off  
 Tri\_mode = Off  
 Dante\_presat = FALSE  
 Initial\_wait = 1[s]  
 Recvr\_gain = 42  
 Relaxation\_delay = 5[s]  
 Repetition\_time = 6.76422912[s]  
 Temp\_get = 24.5[degC]



Chemical structure: 1-(4-bromobenzoyl)-2-(2-(4-toluenesulfonylphenyl)ethyl)indole

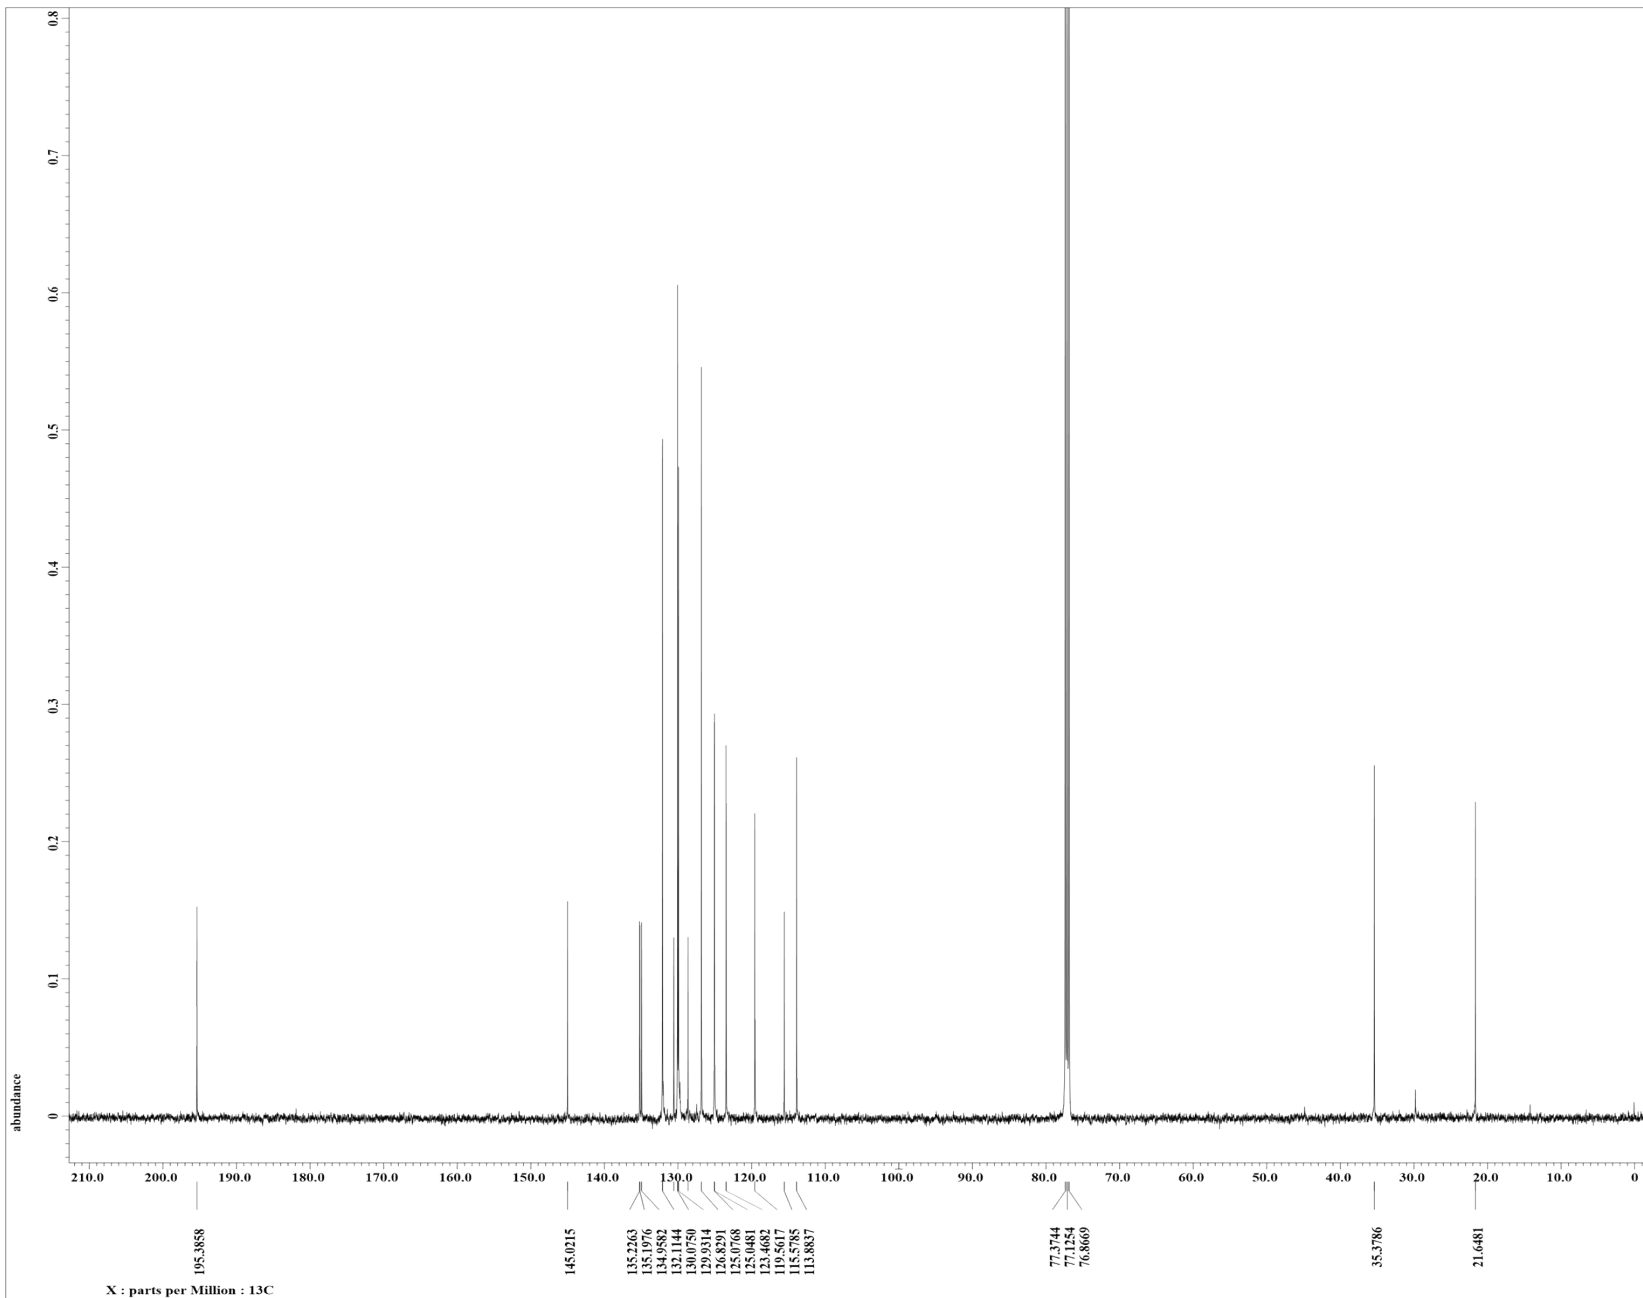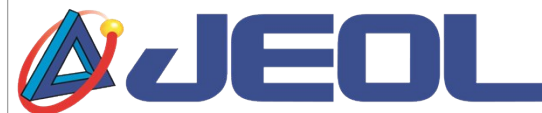

Filename = Ta200603-5H-4\_Br-acet  
 Author = delta  
 Experiment = single pulse\_dec  
 Sample id = S#311755  
 Solvent = CHLOROFORM-D  
 Creation time = 4-JUN-2020 11:09:32  
 Revision time = 4-JUN-2020 11:51:05  
 Current time = 4-JUN-2020 11:51:53

Content = single pulse decouple  
 Data format = 1D COMPLEX  
 Dim\_size = 26214  
 Dim\_title = 13C  
 Dim\_units = [ppm]  
 Dimensions = X  
 Site = ECA 500  
 Spectrometer = DELTA2\_NMR

Field strength = 11.62926421[T] (500[M]  
 X\_acq\_duration = 0.8388608[s]  
 X\_domain = 13C  
 X\_freq = 124.5010059[MHz]  
 X\_offset = 100[ppm]  
 X\_points = 32768  
 X\_prescans = 4  
 X\_resolution = 1.1920929[Hz]  
 X\_sweep = 39.0625[kHz]  
 Irr\_domain = 1H  
 Irr\_freq = 499.13191398[MHz]  
 Irr\_offset = 5[ppm]  
 Clipped = FALSE  
 Mod\_return = 1  
 Scans = 4010  
 Total\_scans = 4010

X\_90\_width = 10.1[us]  
 X\_acq\_time = 0.8388608[s]  
 X\_angle = 30[deg]  
 X\_atn = 9.5[dB]  
 X\_pulse = 3.36666667[us]  
 Irr\_atn\_dec = 21.51[dB]  
 Irr\_atn\_noe = 21.51[dB]  
 Irr\_noise = WALTZ  
 Decoupling = TRUE  
 Initial\_wait = 1[s]  
 Noe = TRUE  
 Noe\_time = 2[s]  
 RecVr\_gain = 60  
 Relaxation\_delay = 2[s]  
 Repetition\_time = 2.8388608[s]  
 Temp\_get = 25[dc]

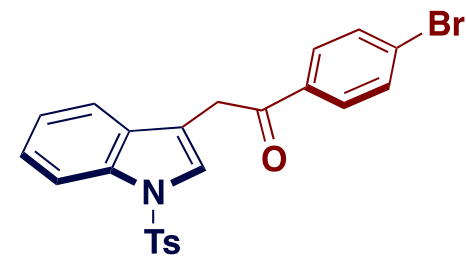

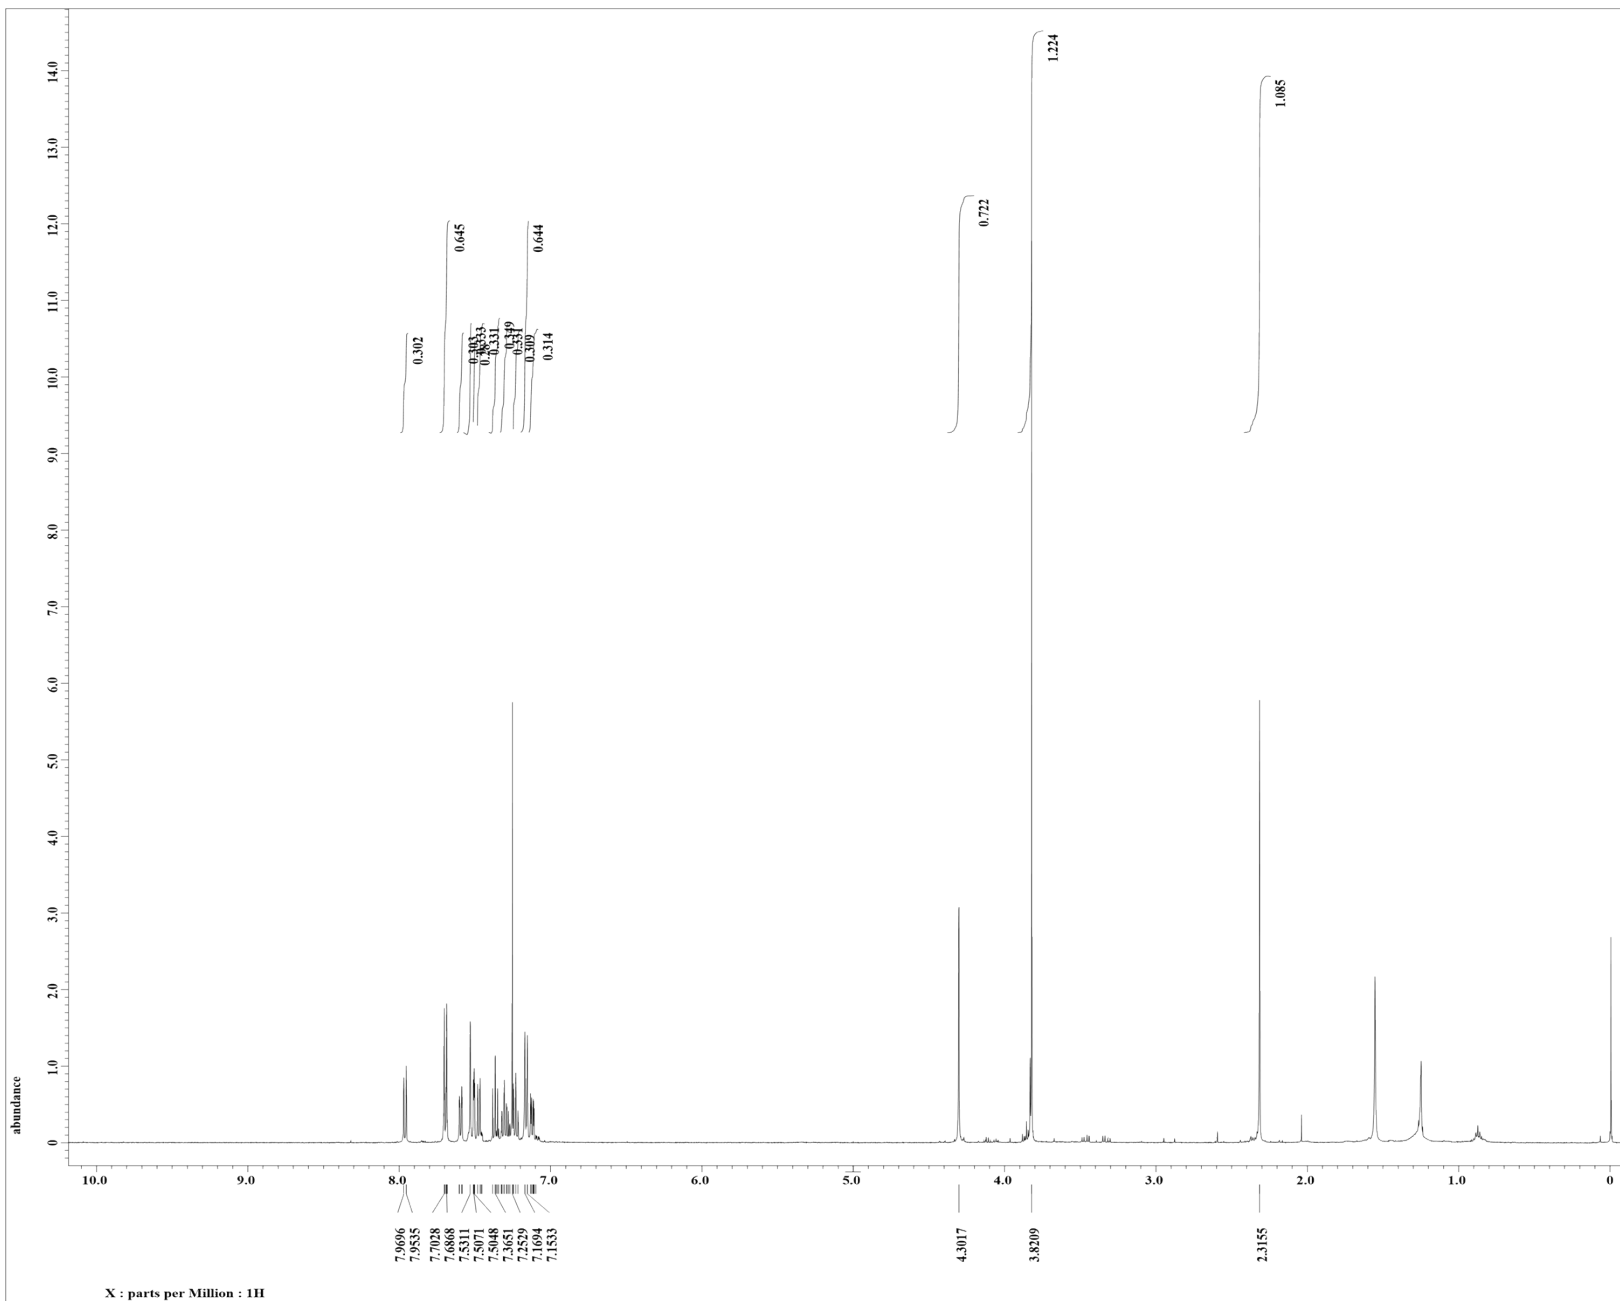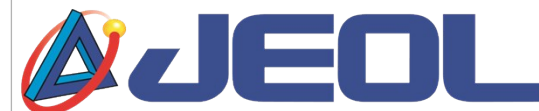

Filename = 5H-3MeO-acetophenone-  
 Author = delta  
 Experiment = single\_pulse.ex2  
 Sample\_id = S8715472  
 Solvent = CHLOROFORM-D  
 Creation\_time = 10-JUN-2020 19:11:55  
 Revision\_time = 11-JUN-2020 08:04:53  
 Current\_time = 11-JUN-2020 08:05:24

Content = single pulse  
 Data\_format = 1D COMPLEX  
 Dim\_size = 13107  
 Dim\_title = 1H  
 Dim\_units = [ppm]  
 Dimensions = X  
 Site = ECA 500  
 Spectrometer = DELTA2\_NMR

Field\_strength = 11.62926421[T] (500[M]  
 X\_acq\_duration = 1.76422912[s]  
 X\_domain = 1H  
 X\_freq = 495.13191398[MHz]  
 X\_offset = 5[ppm]  
 X\_points = 16384  
 X\_prescans = 1  
 X\_resolution = 0.5668198[Hz]  
 X\_sweep = 9.28677563[kHz]  
 Irr\_domain = 1H  
 Irr\_freq = 495.13191398[MHz]  
 Irr\_offset = 5[ppm]  
 Tri\_domain = 1H  
 Tri\_freq = 495.13191398[MHz]  
 Tri\_offset = 5[ppm]  
 Clipped = FALSE  
 Mod\_return = 1  
 Scans = 8  
 Total\_scans = 8

X\_90\_width = 11.3[us]  
 X\_acq\_time = 1.76422912[s]  
 X\_angle = 45[deg]  
 X\_atn = 3.3[dB]  
 X\_pulse = 5.65[us]  
 Irr\_mode = Off  
 Tri\_mode = Off  
 Dante\_presat = FALSE  
 Initial\_wait = 1[s]  
 Recvr\_gain = 50  
 Relaxation\_delay = 5[s]  
 Repetition\_time = 6.76422912[s]  
 Temp\_get = 24.4[degC]

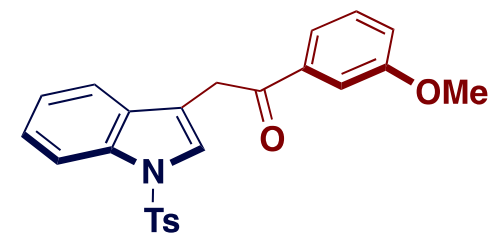

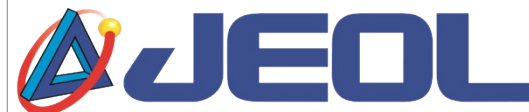

Filename = 5H-3MeO-acetophenone-  
Author = delta  
Experiment = single\_pulse\_dec  
Sample\_id = S#716537  
Solvent = CHLOROFORM-D  
Creation\_time = 11-JUN-2020 07:29:27  
Revision\_time = 11-JUN-2020 08:07:45  
Current\_Time = 11-JUN-2020 08:08:38

Content = single\_pulse\_decouple  
Data\_format = 1D\_COMPLEX  
Dim\_size = 26214  
Dim\_title = 13C  
Dim\_units = [ppm]  
Dimensions = X  
Site = ECA 500  
Spectrometer = DELTA2\_NMR

Field\_strength = 11.62926421[T] (500[M  
X\_acq\_duration = 0.8388608[s]  
X\_domain = 13C  
X\_freq = 124.5010059[MHz]  
X\_offset = 100[ppm]  
X\_points = 32768  
X\_prescans = 4  
X\_resolution = 1.1920929[Hz]  
X\_sweep = 39.0625[kHz]  
Xr\_domain = 1H  
Xr\_freq = 495.13191398[MHz]  
Xr\_offset = 5[ppm]  
Clipped = FALSE  
Mod\_return = 1  
Scans = 15556  
Total\_scans = 15556

X\_90\_width = 10.1[us]  
X\_acq\_time = 0.8388608[s]  
X\_angle = 30[deg]  
X\_atn = 9.5[dB]  
X\_pulse = 3.36666667[us]  
Xr\_atn\_dec = 21.51[dB]  
Xr\_atn\_noe = 21.51[dB]  
Xr\_noise = WALTZ  
Decoupling = TRUE  
Initial\_wait = 1[s]  
Noe = TRUE  
Noe\_time = 2[s]  
Recvr\_gain = 60  
Relaxation\_delay = 2[s]  
Repetition\_time = 2.8388608[s]  
Temp\_get = 25.1[dc]

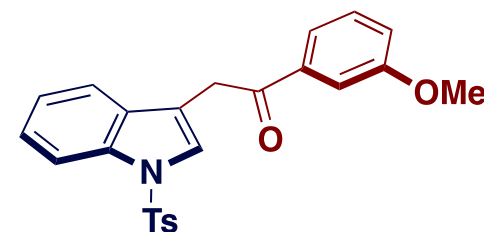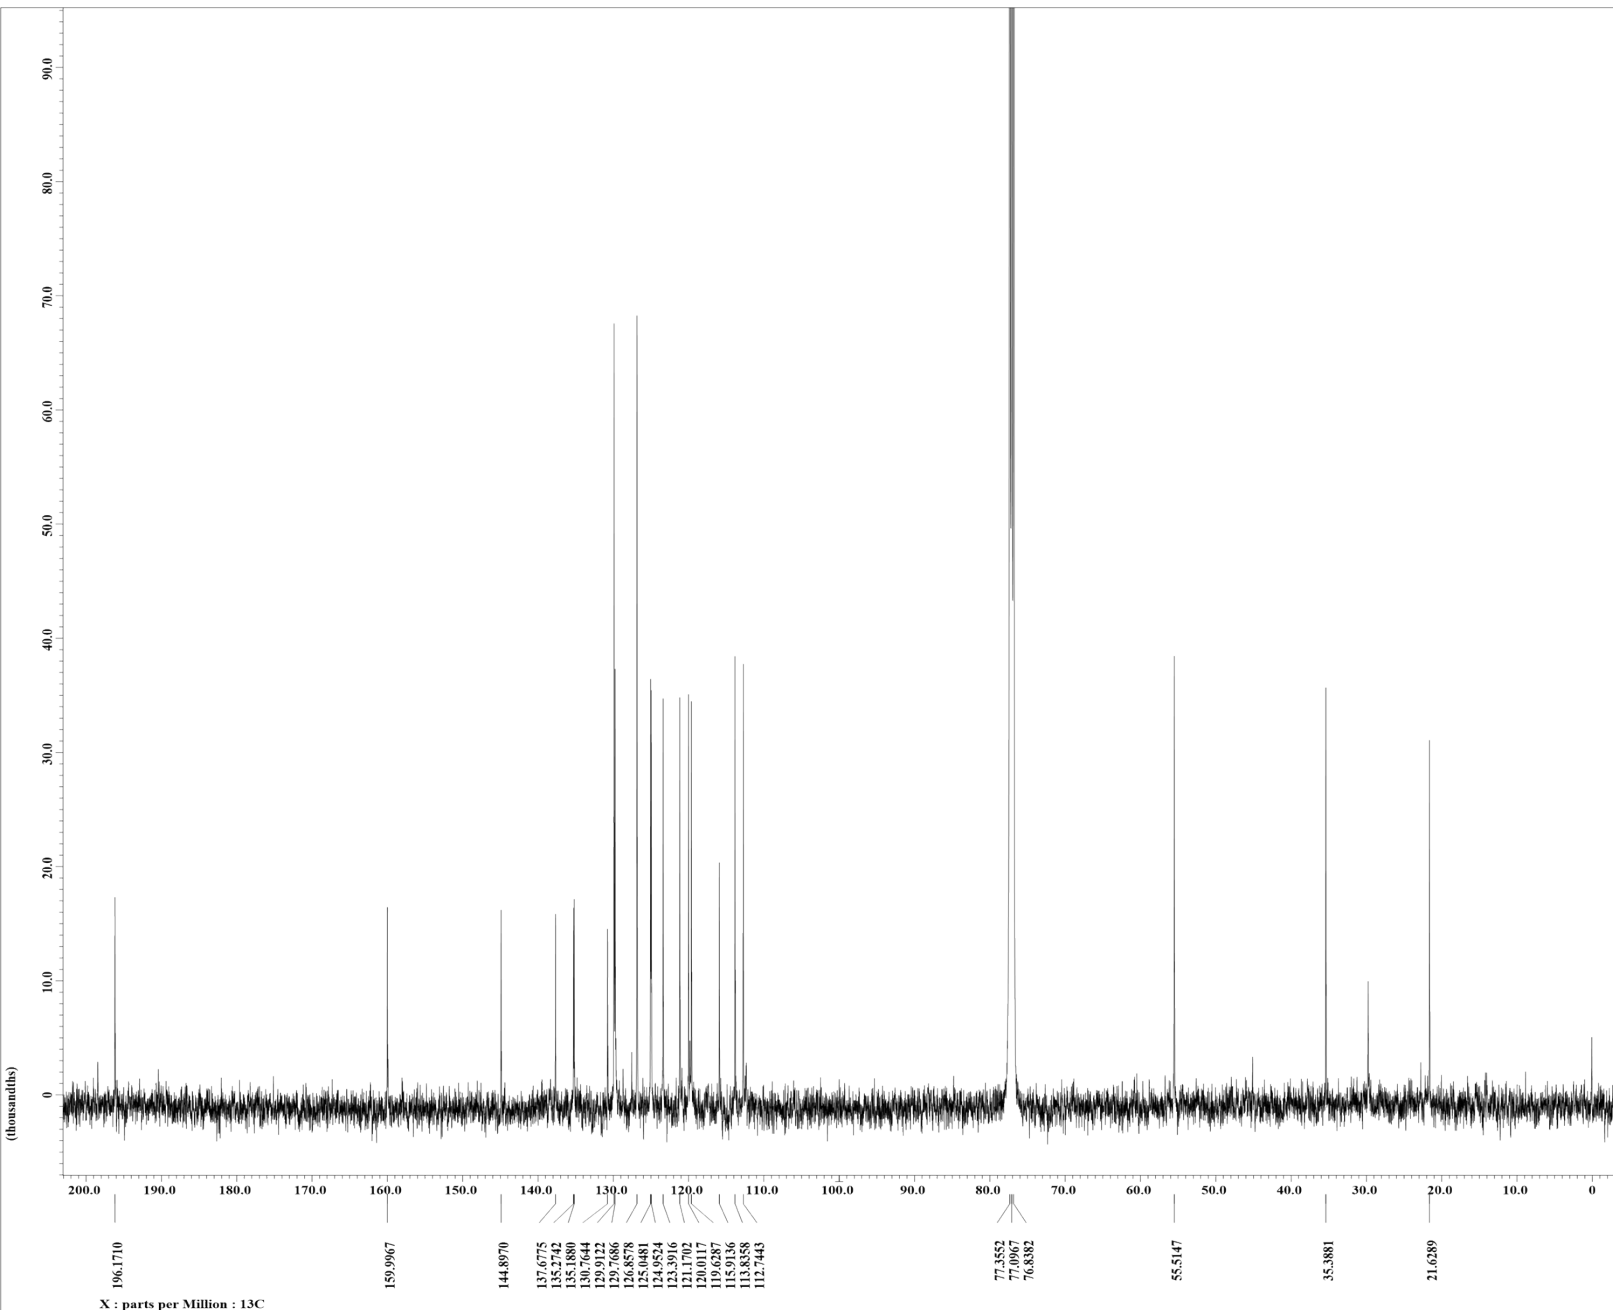



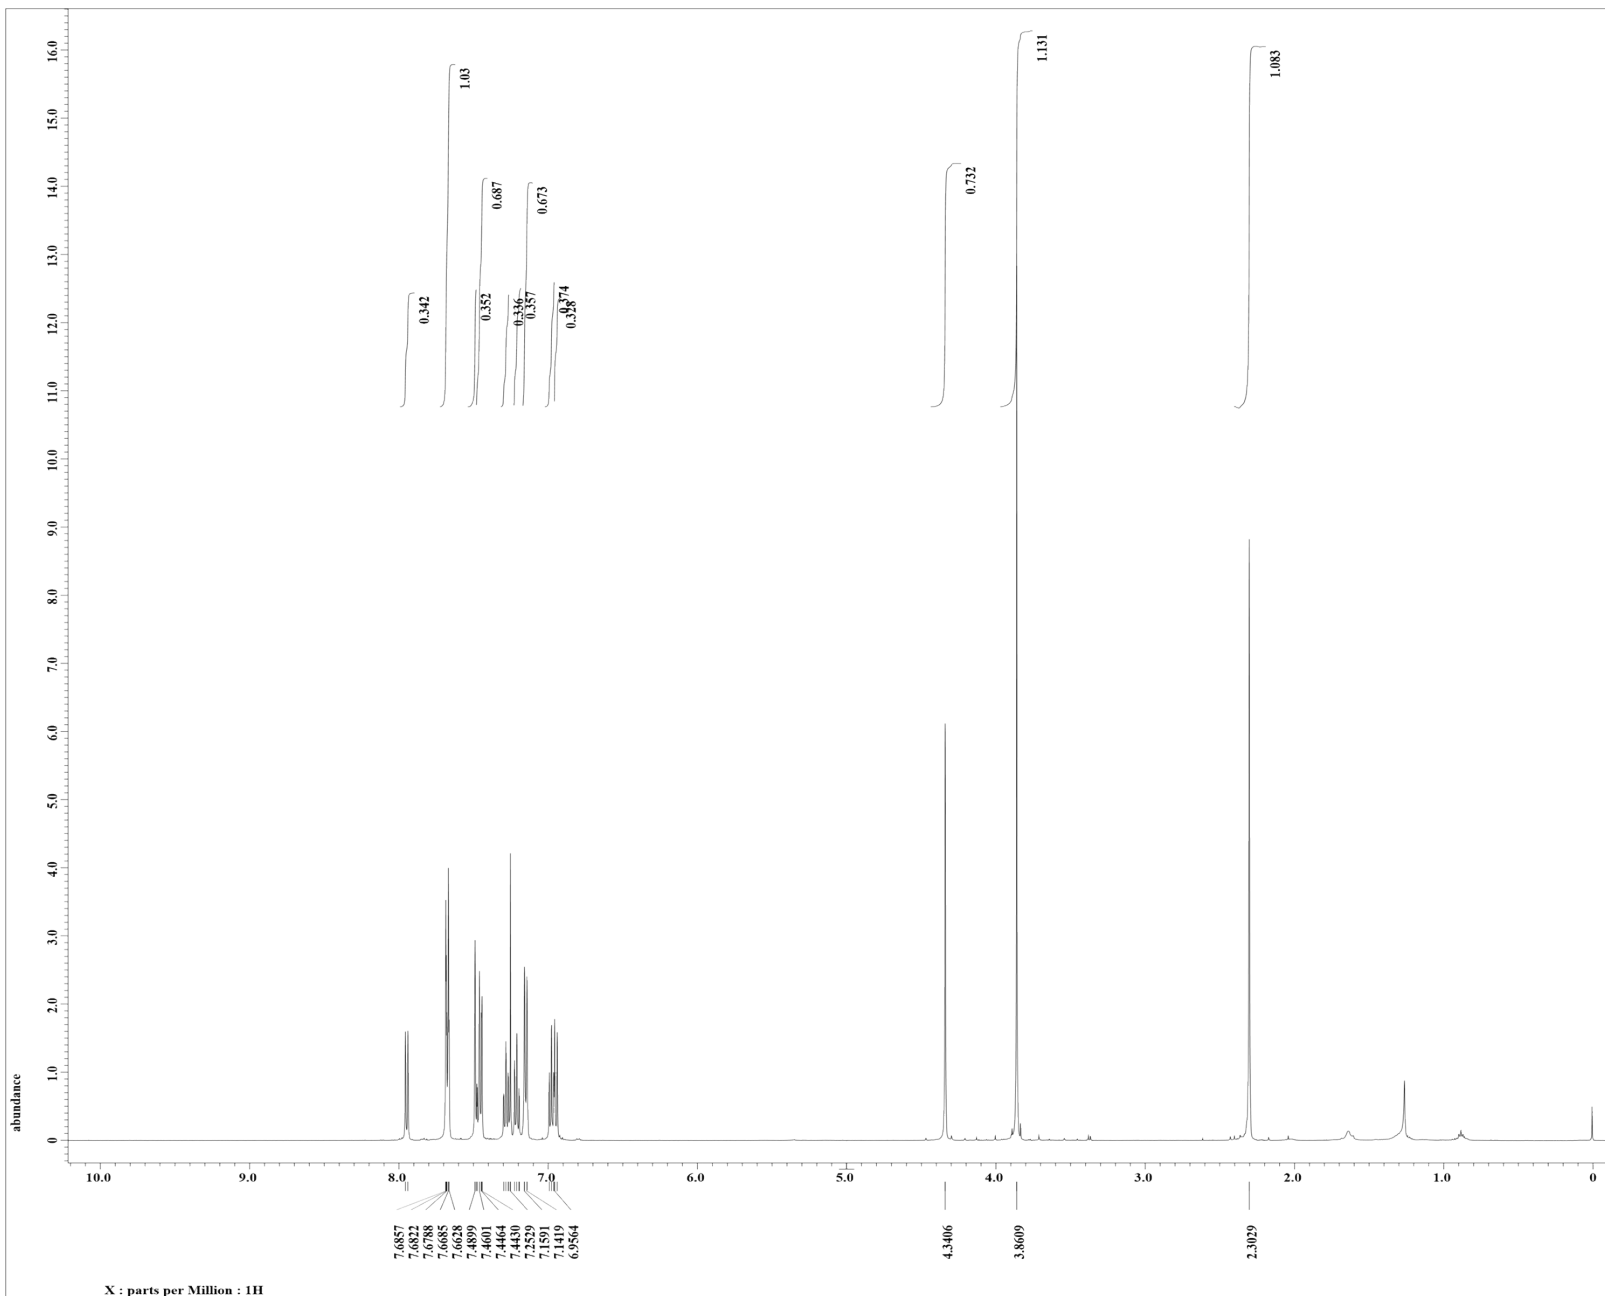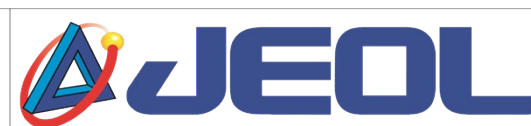

Filename = 5H-2MeO-acetophenone-  
 Author = delta  
 Experiment = single\_pulse.ex2  
 Sample\_id = S#532652  
 Solvent = CHLOROFORM-D  
 Creation\_time = 10-JUN-2020 14:07:43  
 Revision\_time = 10-JUN-2020 14:52:58  
 Current\_time = 10-JUN-2020 14:53:24

Content = 1H-2MeOacetophenone  
 Data\_format = 1D COMPLEX  
 Dim\_size = 13107  
 Dim\_title = 1H  
 Dim\_units = [ppm]  
 Dimensions = X  
 Site = ECA 500  
 Spectrometer = DELTA2\_NMR

Field\_strength = 11.62926421 [T] (500 [M]  
 X\_acq\_duration = 1.76422912 [s]  
 X\_domain = 1H  
 X\_freq = 495.13191398 [MHz]  
 X\_offset = 5 [ppm]  
 X\_points = 16384  
 X\_prescans = 1  
 X\_resolution = 0.5668198 [Hz]  
 X\_sweep = 9.28677563 [kHz]  
 IIR\_domain = 1H  
 IIR\_freq = 495.13191398 [MHz]  
 IIR\_offset = 5 [ppm]  
 Tri\_domain = 1H  
 Tri\_freq = 495.13191398 [MHz]  
 Tri\_offset = 5 [ppm]  
 Clipped = FALSE  
 Mod\_return = 1  
 Scans = 8  
 Total\_scans = 8

X\_90\_width = 11.3 [us]  
 X\_acq\_time = 1.76422912 [s]  
 X\_angle = 45 [deg]  
 X\_atn = 3.3 [dB]  
 X\_pulse = 5.65 [us]  
 IIR\_mode = Off  
 Tri\_mode = Off  
 Dante\_presat = FALSE  
 Initial\_wait = 1 [s]  
 Recvr\_gain = 36  
 Relaxation\_delay = 5 [s]  
 Repetition\_time = 6.76422912 [s]  
 Temp\_get = 24.1 [dC]

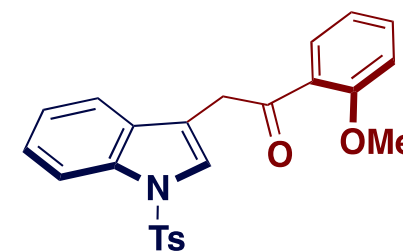

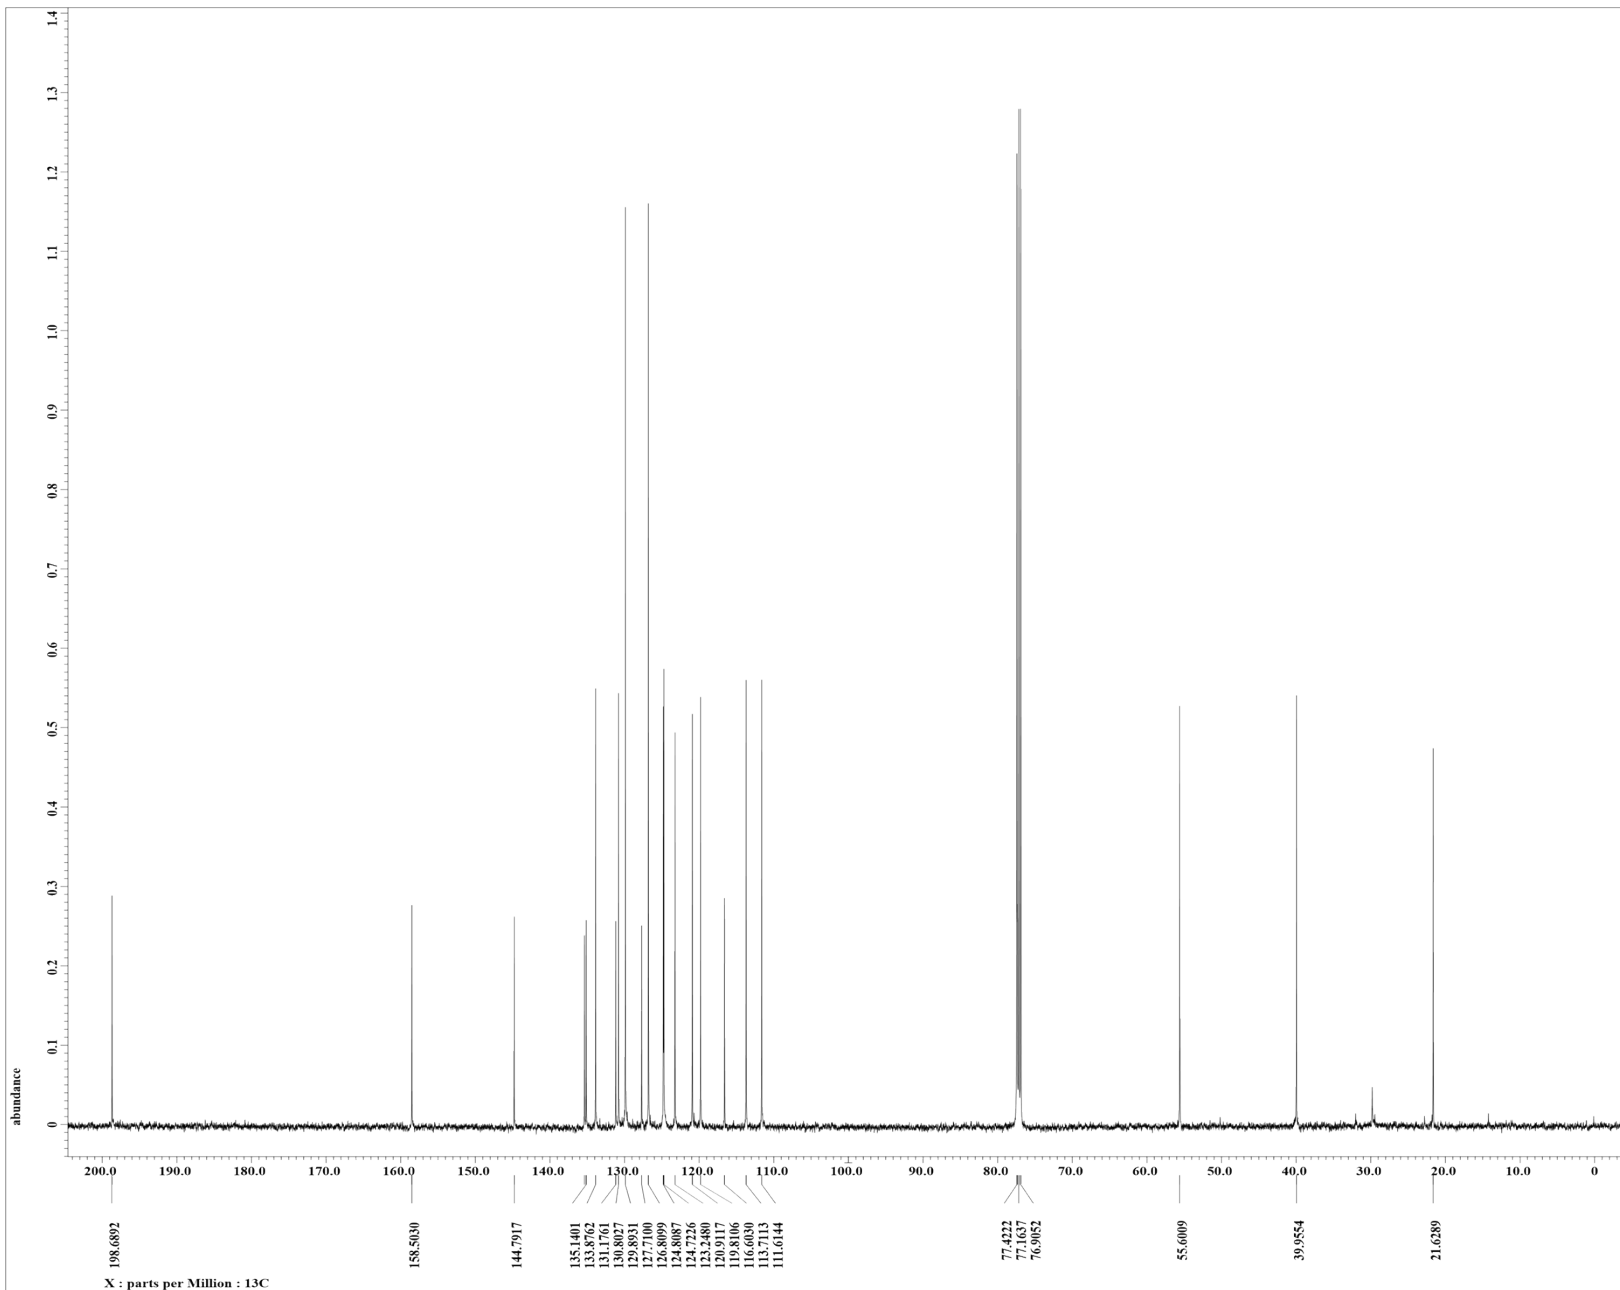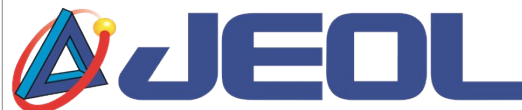

Filename = 5H-2MeO-acetophenone-  
 Author = delta  
 Experiment = single\_pulse\_dec  
 Sample\_id = S#S34021  
 Solvent = CHLOROFORM-D  
 Creation\_time = 10-JUN-2020 15:49:55  
 Revision\_time = 10-JUN-2020 16:32:15  
 Current Time = 10-JUN-2020 16:33:05

Content = 13C-2MeOacetophenone  
 Data\_format = 1D COMPLEX  
 Dim\_Size = 26214  
 Dim\_title = 13C  
 Dim\_units = [ppm]  
 Dimensions = X  
 Site = ECA 500  
 Spectrometer = DELTA2\_NMR

Field\_strength = 11.62926421[T] (500[M  
 X\_acq\_duration = 0.8388608[s]  
 X\_domain = 13C  
 X\_freq = 124.5010059[MHz]  
 X\_offset = 100[ppm]  
 X\_points = 32768  
 X\_prescans = 4  
 X\_resolution = 1.1920929[Hz]  
 X\_sweep = 39.0625[kHz]  
 Irr\_domain = 1H  
 Irr\_freq = 495.13191398[MHz]  
 Irr\_offset = 5[ppm]  
 Clipped = FALSE  
 Mod\_return = 1  
 Scans = 2123  
 Total\_scans = 2123

X\_90\_width = 10.1[us]  
 X\_acq\_time = 0.8388608[s]  
 X\_angle = 30[deg]  
 X\_atn = 9.5[db]  
 X\_pulse = 3.36666667[us]  
 Irr\_atn\_dec = 21.51[db]  
 Irr\_atn\_noe = 21.51[db]  
 Irr\_noise = WALTZ  
 Decoupling = TRUE  
 Initial\_wait = 1[s]  
 Noe = TRUE  
 Noe\_time = 2[s]  
 Recvr\_gain = 60  
 Relaxation\_delay = 2[s]  
 Repetition\_time = 2.8388608[s]  
 Temp\_get = 25[dc]

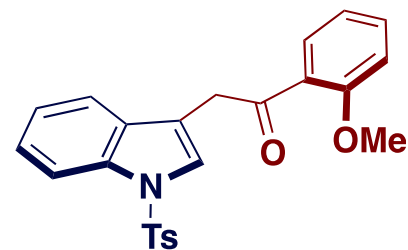

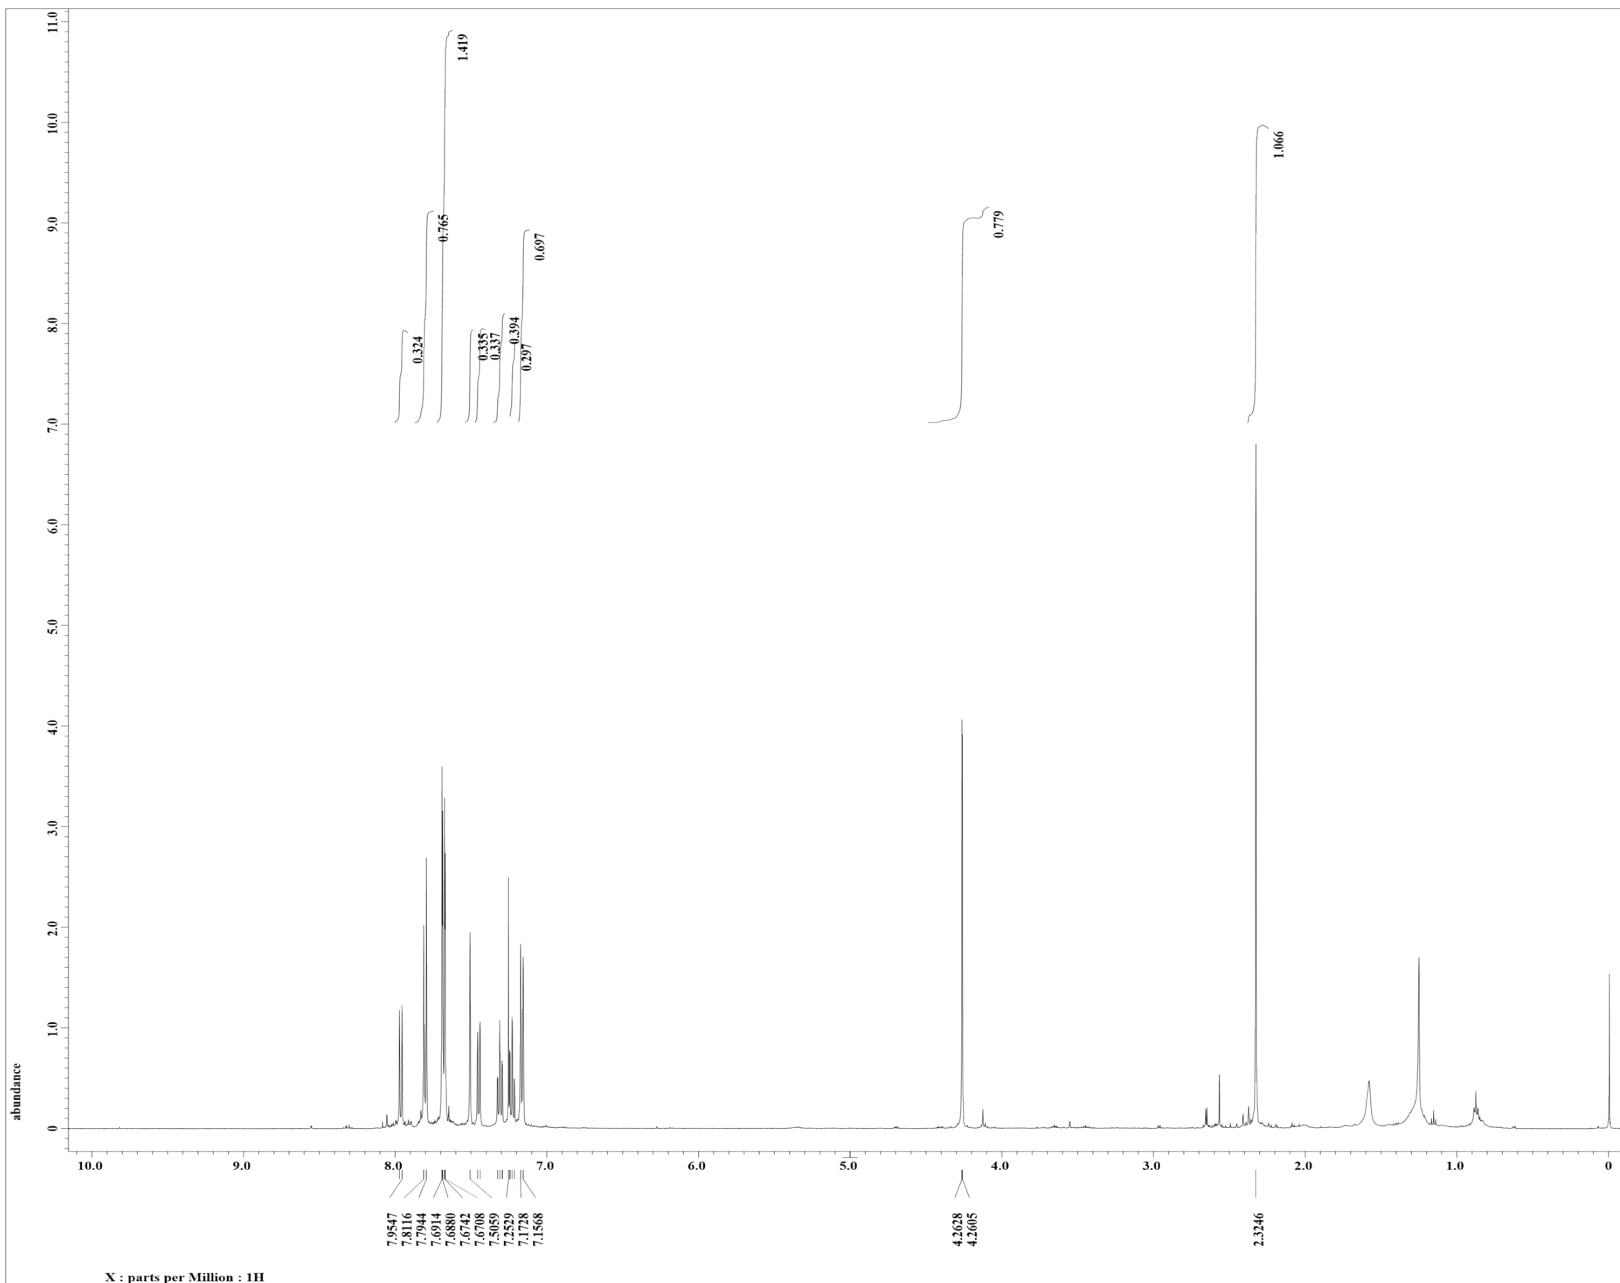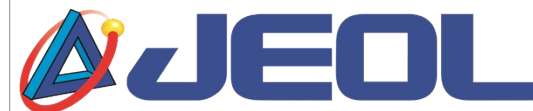

Filename = TA200617-4I-acetophen  
 Author = delta  
 Experiment = single pulse.ex2  
 Sample\_id = S#339946  
 Solvent = CHLOROFORM-D  
 Creation\_time = 17-JUN-2020 08:49:47  
 Revision\_time = 17-JUN-2020 09:32:03  
 Current\_time = 17-JUN-2020 09:32:58

Content = single pulse  
 Data\_format = 1D COMPLEX  
 Dim\_size = 13107  
 Dim\_title = 1H  
 Dim\_units = [ppm]  
 Dimensions = X  
 Site = ECA 500  
 Spectrometer = DELTA2\_NMR

Field\_strength = 11.62926421[T] (500[M]  
 X\_acq\_duration = 1.76422912[s]  
 X\_domain = 1H  
 X\_freq = 495.13191398[MHz]  
 X\_offset = 5[ppm]  
 X\_points = 16384  
 X\_prescans = 1  
 X\_resolution = 0.5668198[Hz]  
 X\_sweep = 9.28677563[kHz]  
 Irr\_domain = 1H  
 Irr\_freq = 495.13191398[MHz]  
 Irr\_offset = 5[ppm]  
 Tri\_domain = 1H  
 Tri\_freq = 495.13191398[MHz]  
 Tri\_offset = 5[ppm]  
 Clipped = FALSE  
 Mod\_return = 1  
 Scans = 8  
 Total\_scans = 8

X\_90\_width = 11.3[us]  
 X\_acq\_time = 1.76422912[s]  
 X\_angle = 45[deg]  
 X\_atn = 3.3[db]  
 X\_pulse = 5.65[us]  
 Irr\_mode = Off  
 Tri\_mode = Off  
 Dante\_presat = FALSE  
 Initial\_wait = 1[s]  
 Recvr\_gain = 44  
 Relaxation\_delay = 5[s]  
 Repetition\_time = 6.76422912[s]  
 Temp\_get = 24.5[dc]

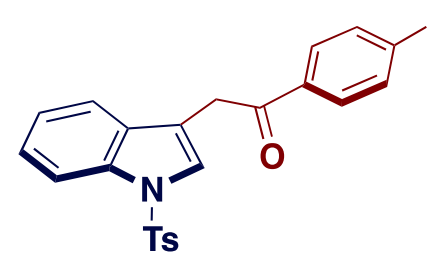

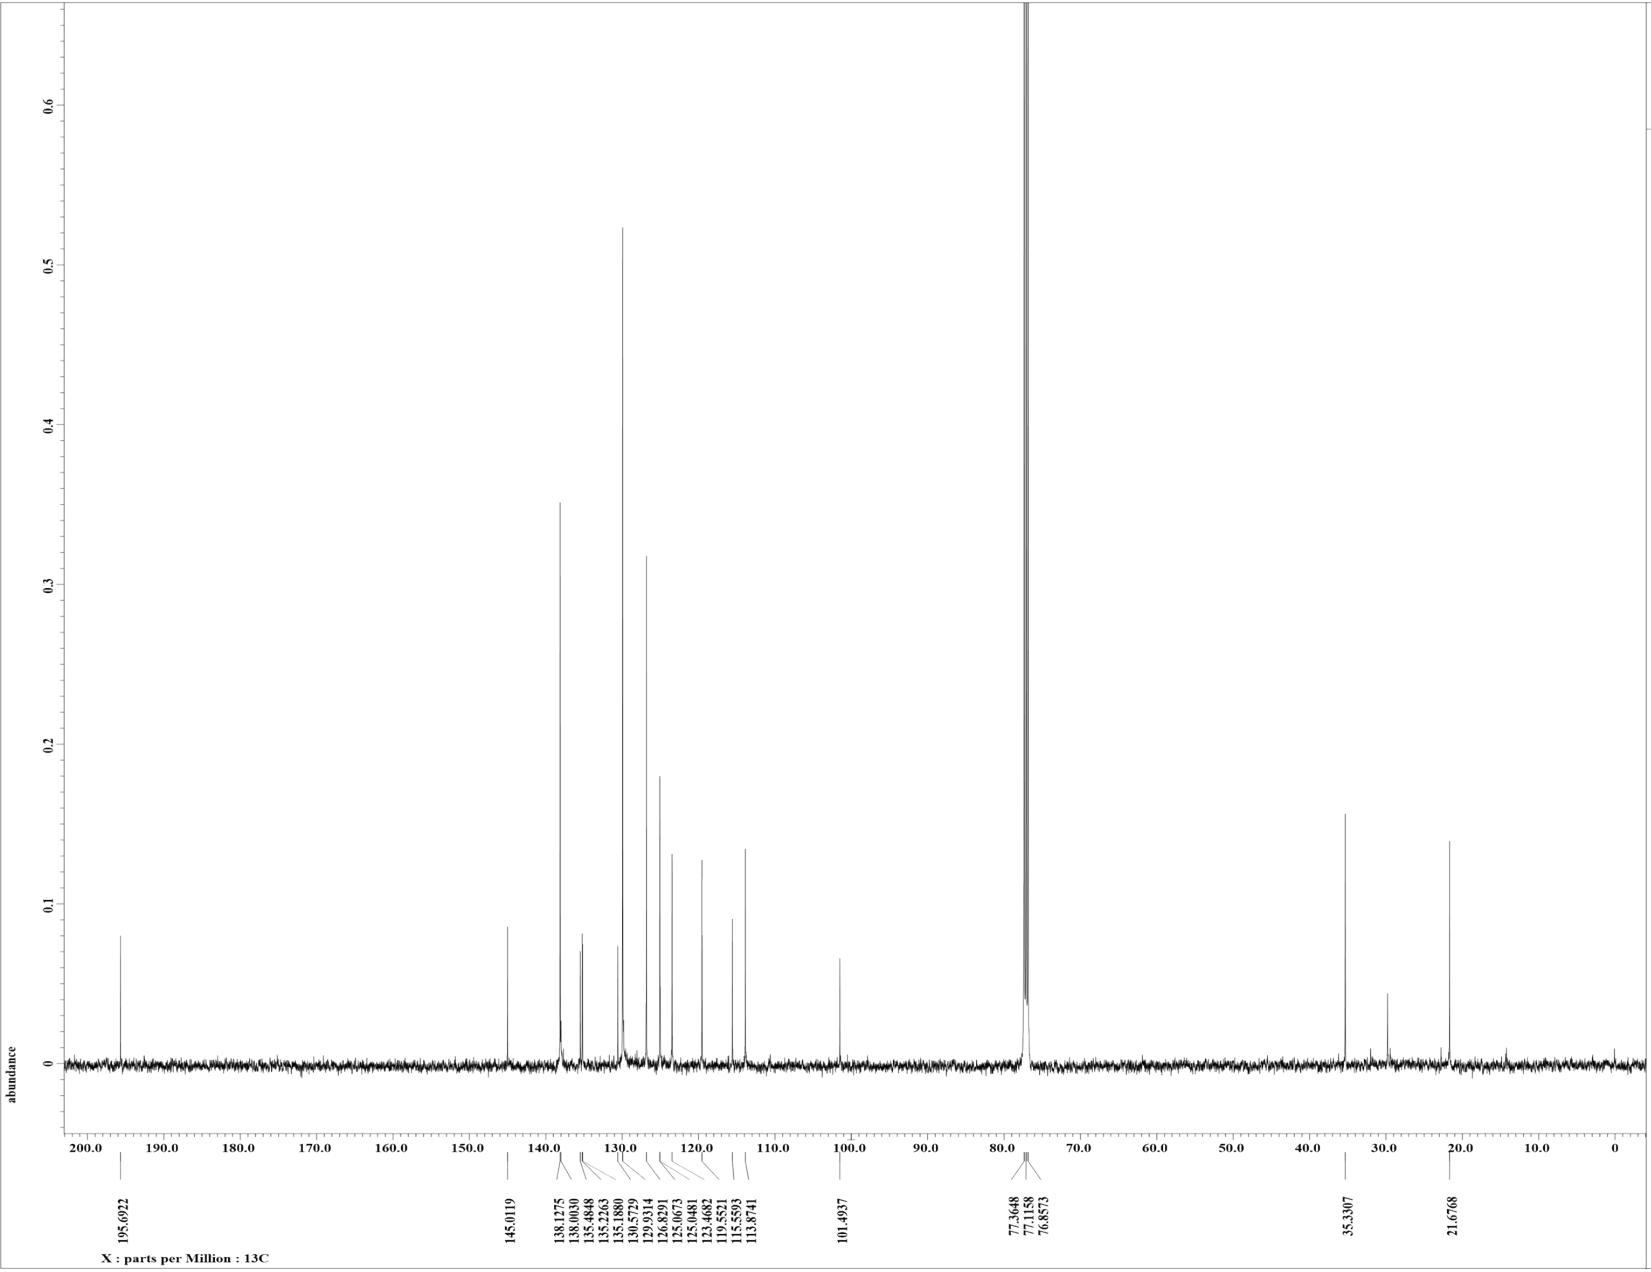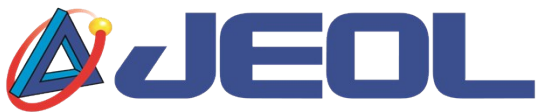

Filename = TA200617-4I-acetophen  
Author = delta  
Experiment = single\_pulse\_dec  
Sample\_id = S#341792  
Solvent = CHLOROFORM-D  
Creation\_time = 17-JUN-2020 11:12:11  
Revision\_time = 17-JUN-2020 11:51:34  
Current\_time = 17-JUN-2020 11:52:21

Content = single\_pulse decouple  
Data\_format = 1D COMPLEX  
Dim\_size = 26214  
Dim\_title = 13C  
Dim\_units = [ppm]  
Dimensions = X  
Site = ECA 500  
Spectrometer = DELTA2\_NMR

Field\_strength = 11.62926421[T] (500[M]  
X\_acq\_duration = 0.8388608[s]  
X\_domain = 13C  
X\_freq = 124.5010059[MHz]  
X\_offset = 100[ppm]  
X\_points = 32768  
X\_prescans = 4  
X\_resolution = 1.1920929[Hz]  
X\_sweep = 39.0625[kHz]  
IFr\_domain = 1H  
Irr\_freq = 495.13191398[MHz]  
Irr\_offset = 5[ppm]  
Clipped = FALSE  
Mod\_return = 1  
Scans = 2958  
Total\_scans = 2958

X\_90\_width = 10.1[us]  
X\_acq\_time = 0.8388608[s]  
X\_angle = 30[deg]  
X\_atn = 9.5[dB]  
X\_pulse = 3.366666667[us]  
Irr\_atn\_dec = 21.51[dB]  
Irr\_atn\_noe = 21.51[dB]  
Irr\_noise = WALTZ  
Decoupling = TRUE  
Initial\_wait = 1[s]  
Noe = TRUE  
Noe\_time = 2[s]  
RecVr\_gain = 60  
Relaxation\_delay = 2[s]  
Repetition\_time = 2.8388608[s]  
Temp\_get = 25.3[dc]

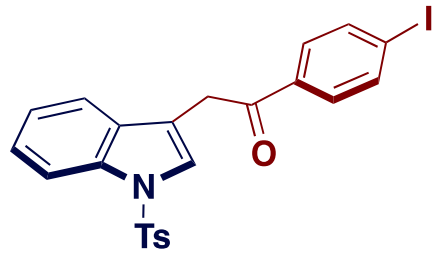

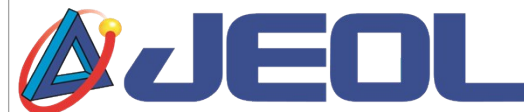

Filename = TA200530-modification  
 Author = delta  
 Experiment = single pulse.ex2  
 Sample\_id = S#437052  
 Solvent = CHLOROFORM-D  
 Creation\_time = 30-MAY-2020 11:30:25  
 Revision\_time = 30-MAY-2020 12:14:23  
 Current\_time = 30-MAY-2020 12:15:30

Content = single pulse  
 Data format = 1D COMPLEX  
 Dim\_size = 13107  
 Dim\_title = 1H  
 Dim\_units = [ppm]  
 Dimensions = X  
 Site = ECA 500  
 Spectrometer = DELTA2\_NMR

Field strength = 11.62926421 [T] (500 [M])  
 X\_acq\_duration = 1.76422912 [s]  
 X\_domain = 1H  
 X\_freq = 495.13191398 [MHz]  
 X\_offset = 5 [ppm]  
 X\_points = 16384  
 X\_prescans = 1  
 X\_resolution = 0.5668198 [Hz]  
 X\_sweep = 9.28677563 [kHz]  
 IIR\_domain = 1H  
 IIR\_freq = 495.13191398 [MHz]  
 IIR\_offset = 5 [ppm]  
 Tri\_domain = 1H  
 Tri\_freq = 495.13191398 [MHz]  
 Tri\_offset = 5 [ppm]  
 Clipped = FALSE  
 Mod\_return = 1  
 Scans = 8  
 Total\_scans = 8

X\_90\_width = 11.3 [us]  
 X\_acq\_time = 1.76422912 [s]  
 X\_angle = 45 [deg]  
 X\_atn = 3.3 [dB]  
 X\_pulse = 5.65 [us]  
 IIR\_mode = Off  
 Tri\_mode = Off  
 Dante\_presat = FALSE  
 Initial\_wait = 1 [s]  
 Recvr\_gain = 46  
 Relaxation\_delay = 5 [s]  
 Repetition\_time = 6.76422912 [s]  
 Temp\_get = 24.3 [dc]

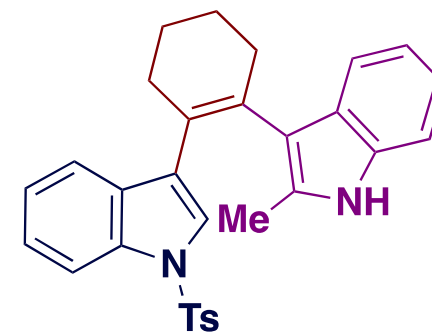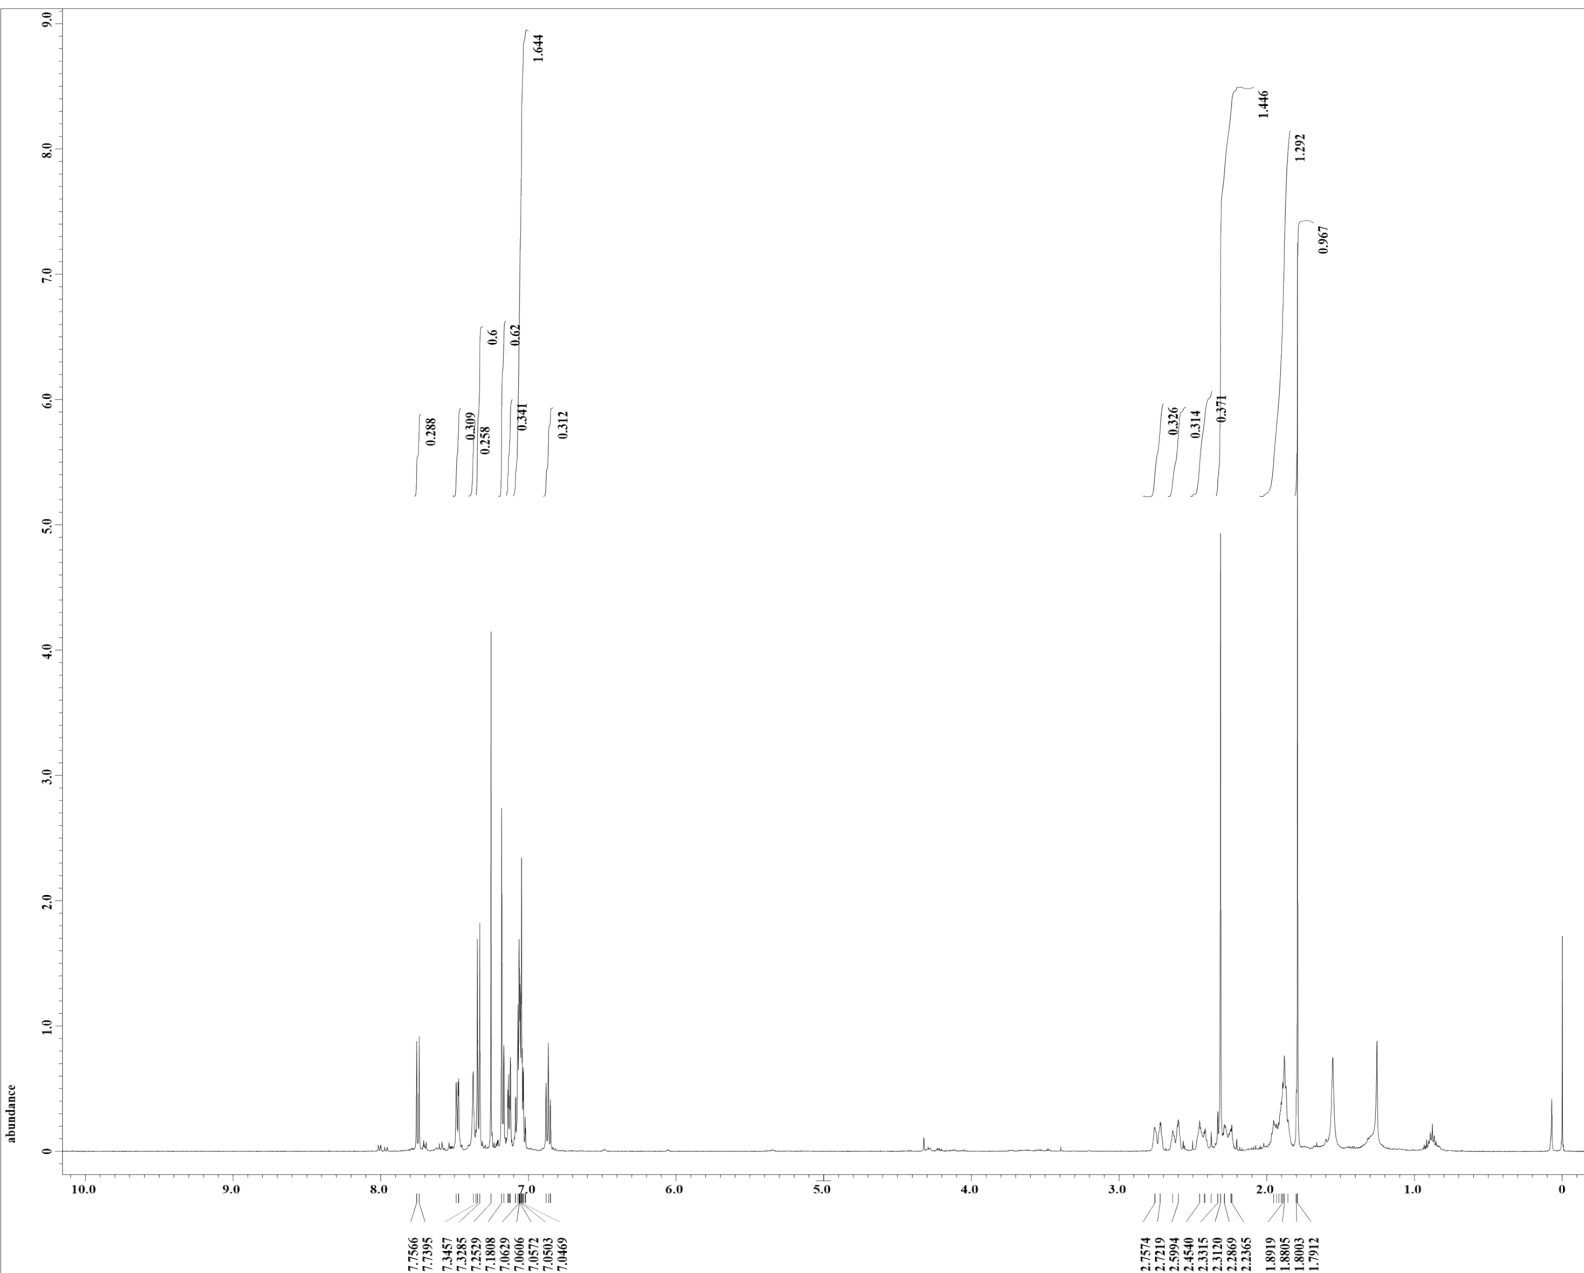

X : parts per Million : 1H

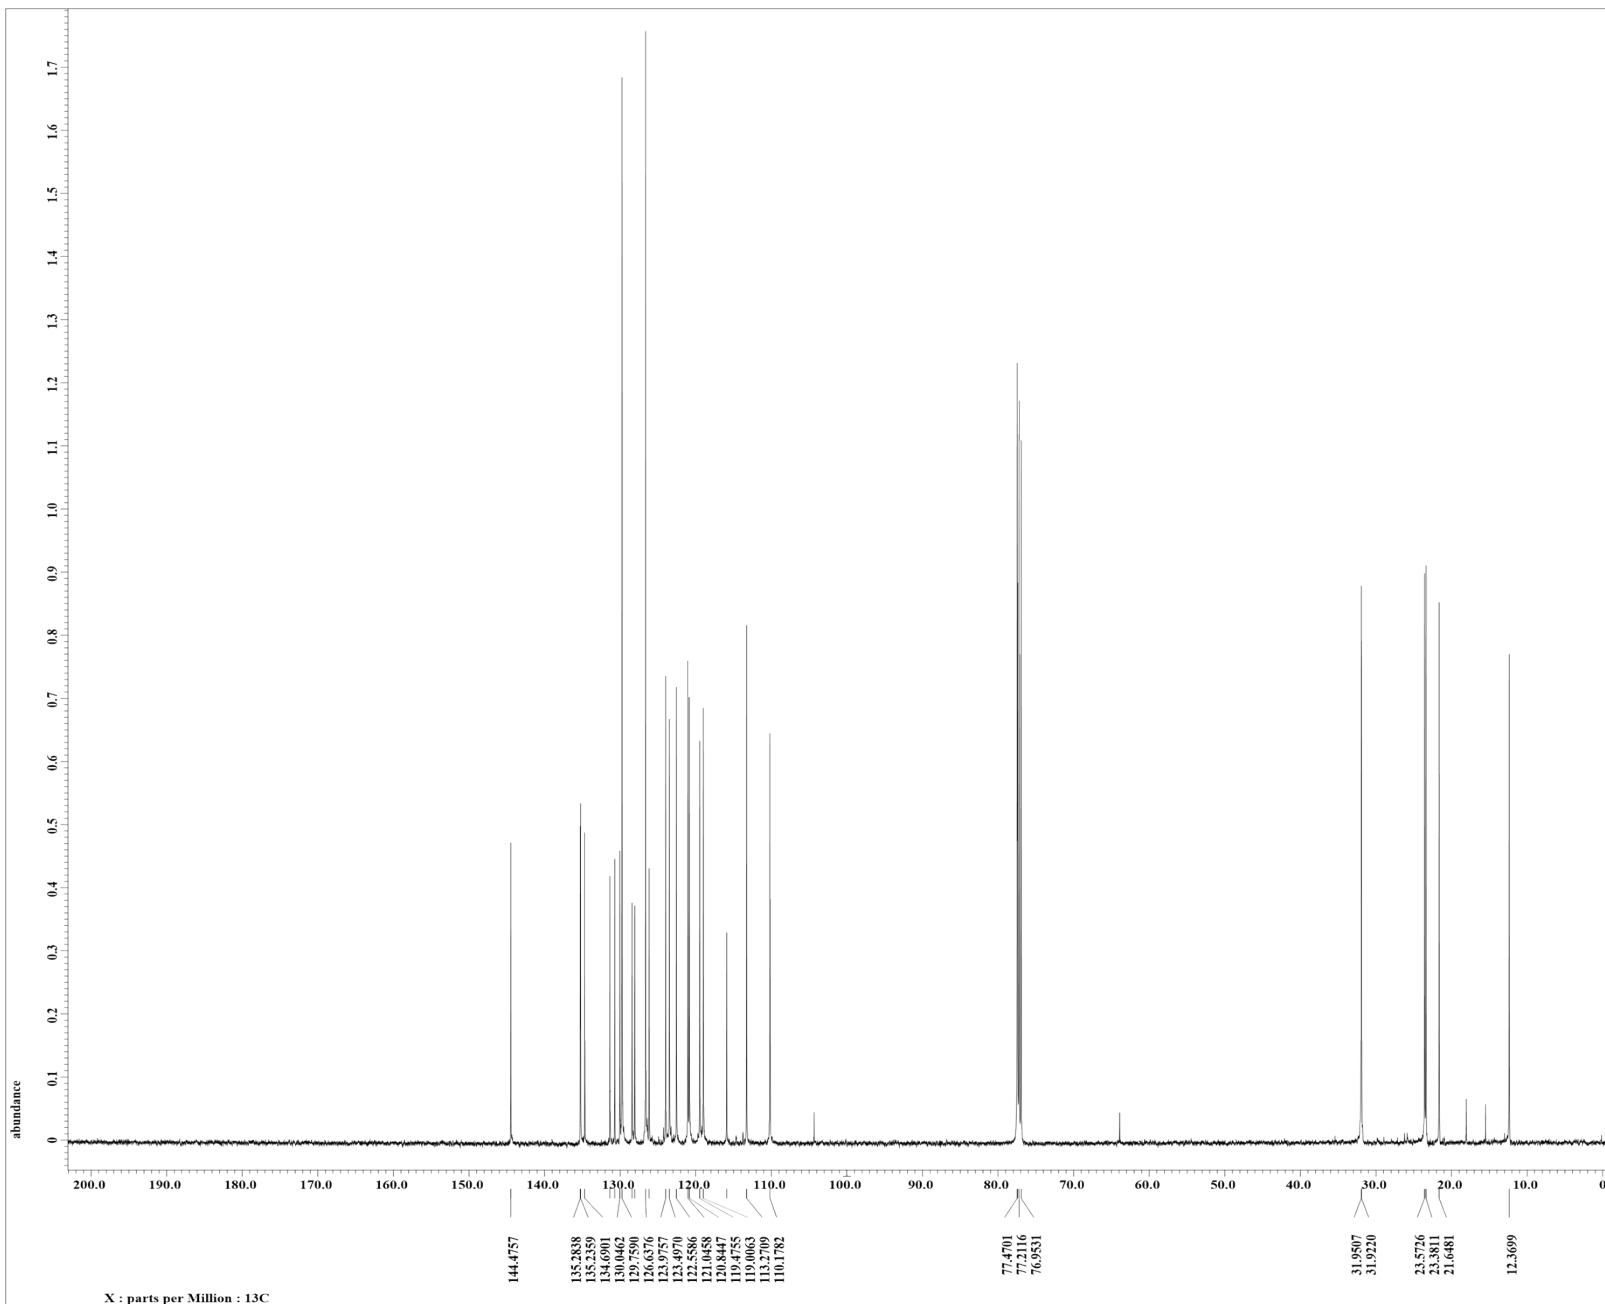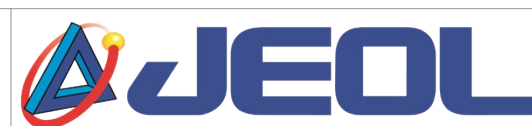

```

Filename      = TA200530-modification
Author        = delta
Experiment    = single_pulse_dec
Sample_id     = S#491370
Solvent       = CHLOROFORM-D
Creation_time  = 30-MAY-2020 15:22:43
Revision_time  = 30-MAY-2020 16:04:49
Current_time   = 30-MAY-2020 16:05:41

Content       = cyclohexene
Data_format   = 1D_COMPLEX
Dim_size      = 26214
Dim_title     = 13C
Dim_units     = [ppm]
Dimensions    = X
Site          = ECA 500
Spectrometer  = DELTA2_NMR

Field_strength = 11.62926421[T] (500[M]
X_acq_duration = 0.8388608[s]
X_domain       = 13C
X_freq         = 124.5010059[MHz]
X_offset       = 100[ppm]
X_points       = 32768
X_prescans     = 4
X_resolution   = 1.1920929[Hz]
X_sweep        = 39.0625[kHz]
Irr_domain     = 1H
Irr_freq       = 495.13191398[MHz]
Irr_offset     = 5[ppm]
Clipped        = TRUE
Mod_return     = 1
Scans          = 3020
Total_scans    = 3020

X_90_width     = 10.1[us]
X_acq_time     = 0.8388608[s]
X_angle        = 30[deg]
X_atn          = 9.5[dB]
X_pulse        = 3.36666667[us]
Irr_atn_dec    = 21.51[dB]
Irr_atn_noe    = 21.51[dB]
Irr_noise      = WALTZ
Decoupling     = TRUE
Initial_wait   = 1[s]
Noe            = TRUE
Noe_time       = 2[s]
RecVr_gain     = 60
Relaxation_delay = 2[s]
Repetition_time = 2.8388608[s]
Temp_get       = 25.1[dc]
  
```

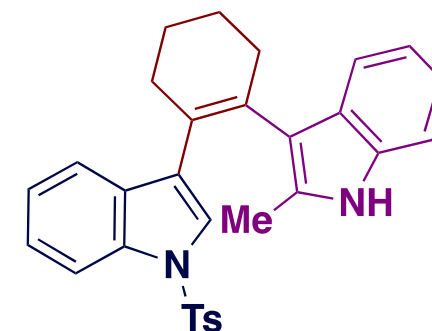

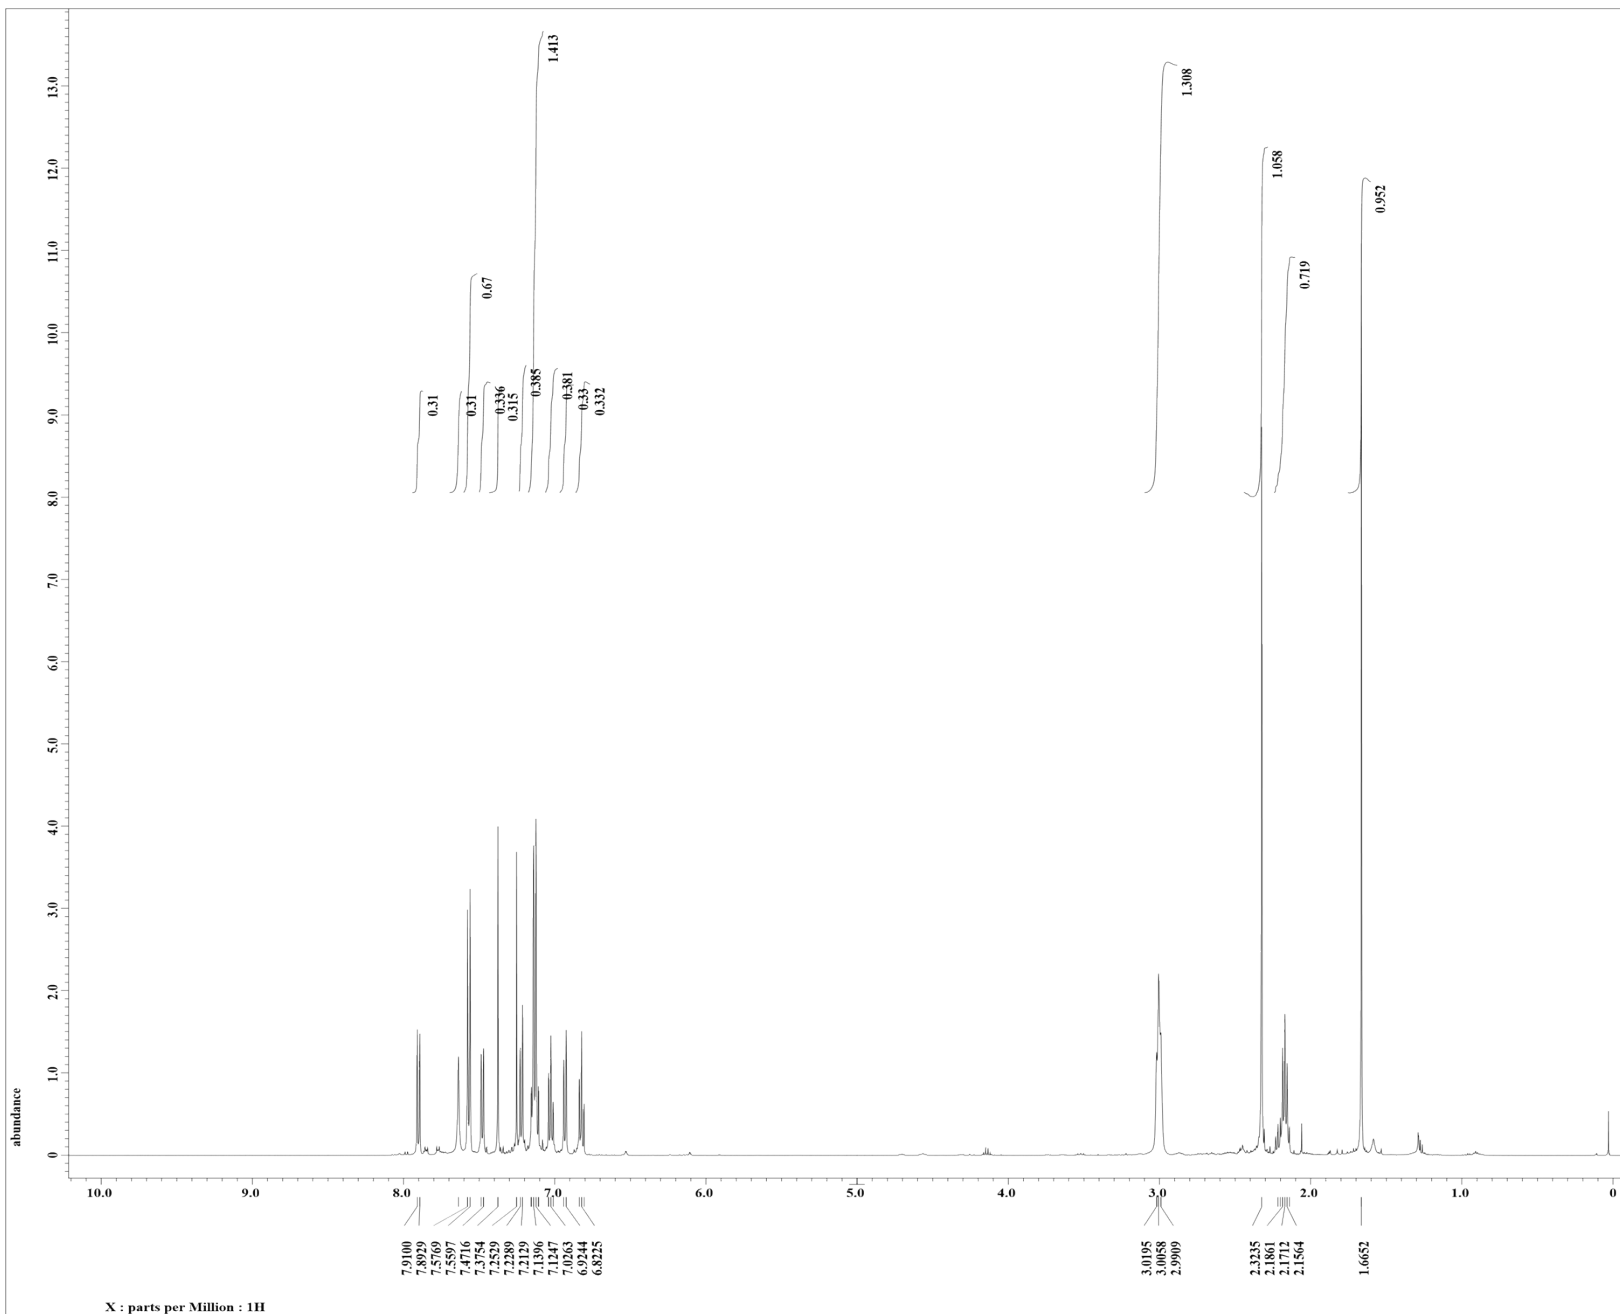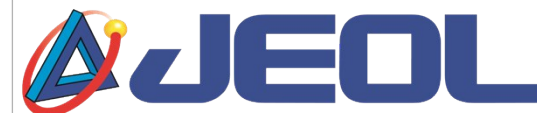

```

Filename      = TA200530-modification
Author       = delta
Experiment    = single_pulse.ex2
Sample_id    = S#583459
Solvent      = CHLOROFORM-D
Creation_time = 30-MAY-2020 15:34:11
Revision_time = 30-MAY-2020 16:17:48
Current_time  = 30-MAY-2020 16:20:04

Content       = cyclopentene
Data_format   = 1D_COMPLEX
Dim_size      = 13107
Dim_title     = 1H
Dim_units     = [ppm]
Dimensions    = X
Site          = ECA 500
Spectrometer  = DELTA2_NMR

Field_strength = 11.62926421[T] (500[M]
X_acq_duration = 1.76422912[s]
X_domain       = 1H
X_freq         = 495.13191398[MHz]
X_offset       = 5[ppm]
X_points       = 16384
X_prescans     = 1
X_resolution   = 0.5668198[Hz]
X_sweep        = 9.28677563[kHz]
Irr_domain     = 1H
Irr_freq       = 495.13191398[MHz]
Irr_offset     = 5[ppm]
Tri_domain     = 1H
Tri_freq       = 495.13191398[MHz]
Tri_offset     = 5[ppm]
Clipped        = FALSE
Mod_return     = 1
Scans          = 8
Total_scans    = 8

X_90_width    = 11.3[us]
X_acq_time     = 1.76422912[s]
X_angle        = 45[deg]
X_atn          = 3.3[dB]
X_pulse       = 5.65[us]
Irr_mode       = Off
Tri_mode       = Off
Dante_presat   = FALSE
Initial_wait   = 1[s]
Recvr_gain     = 36
Relaxation_delay = 5[s]
Repetition_time = 6.76422912[s]
Temp_get       = 24.6[dc]
  
```

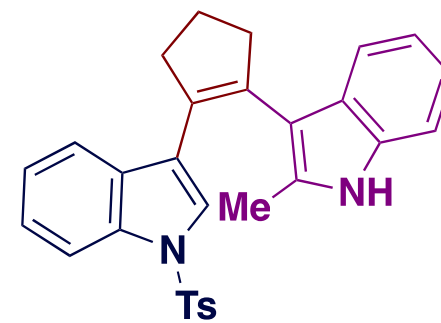

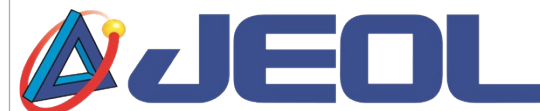

Filename = TA200530-modification  
 Author = delta  
 Experiment = single\_pulse\_dec  
 Sample\_id = S#585209  
 Solvent = CHLOROFORM-D  
 Creation\_time = 1-JUN-2020 07:42:53  
 Revision\_time = 1-JUN-2020 08:24:27  
 Current\_time = 1-JUN-2020 08:26:11

Content = cyclopentene  
 Data\_format = 1D\_COMPLEX  
 Dim\_size = 26214  
 Dim\_title = 13C  
 Dim\_units = [ppm]  
 Dimensions = X  
 Site = ECA 500  
 Spectrometer = DELTA2\_NMR

Field\_strength = 11.62926421[T] (500[M]  
 X\_acq\_duration = 0.8388608[s]  
 X\_domain = 13C  
 X\_freq = 124.5010059[MHz]  
 X\_offset = 100[ppm]  
 X\_points = 32768  
 X\_prescans = 4  
 X\_resolution = 1.1920929[Hz]  
 X\_sweep = 39.0625[kHz]  
 IPr\_domain = 1H  
 Irr\_freq = 495.13191398[MHz]  
 Irr\_offset = 5[ppm]  
 Clipped = TRUE  
 Mod\_return = 1  
 Scans = 50864  
 Total\_scans = 50864

X\_90\_width = 10.1[us]  
 X\_acq\_time = 0.8388608[s]  
 X\_angle = 30[deg]  
 X\_atn = 9.5[dB]  
 X\_pulse = 3.36666667[us]  
 Irr\_atn\_dec = 21.51[dB]  
 Irr\_atn\_noe = 21.51[dB]  
 Irr\_noise = WALTZ  
 Decoupling = TRUE  
 Initial\_wait = 1[s]  
 Noe = TRUE  
 Noe\_time = 2[s]  
 Recvr\_gain = 60  
 Relaxation\_delay = 2[s]  
 Repetition\_time = 2.8388608[s]  
 Temp\_get = 24.9[dC]

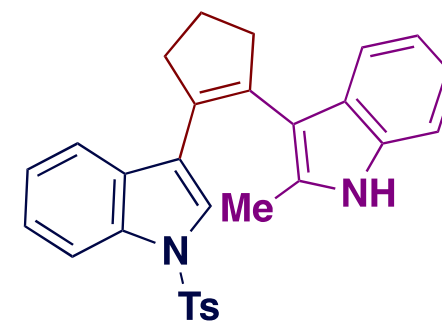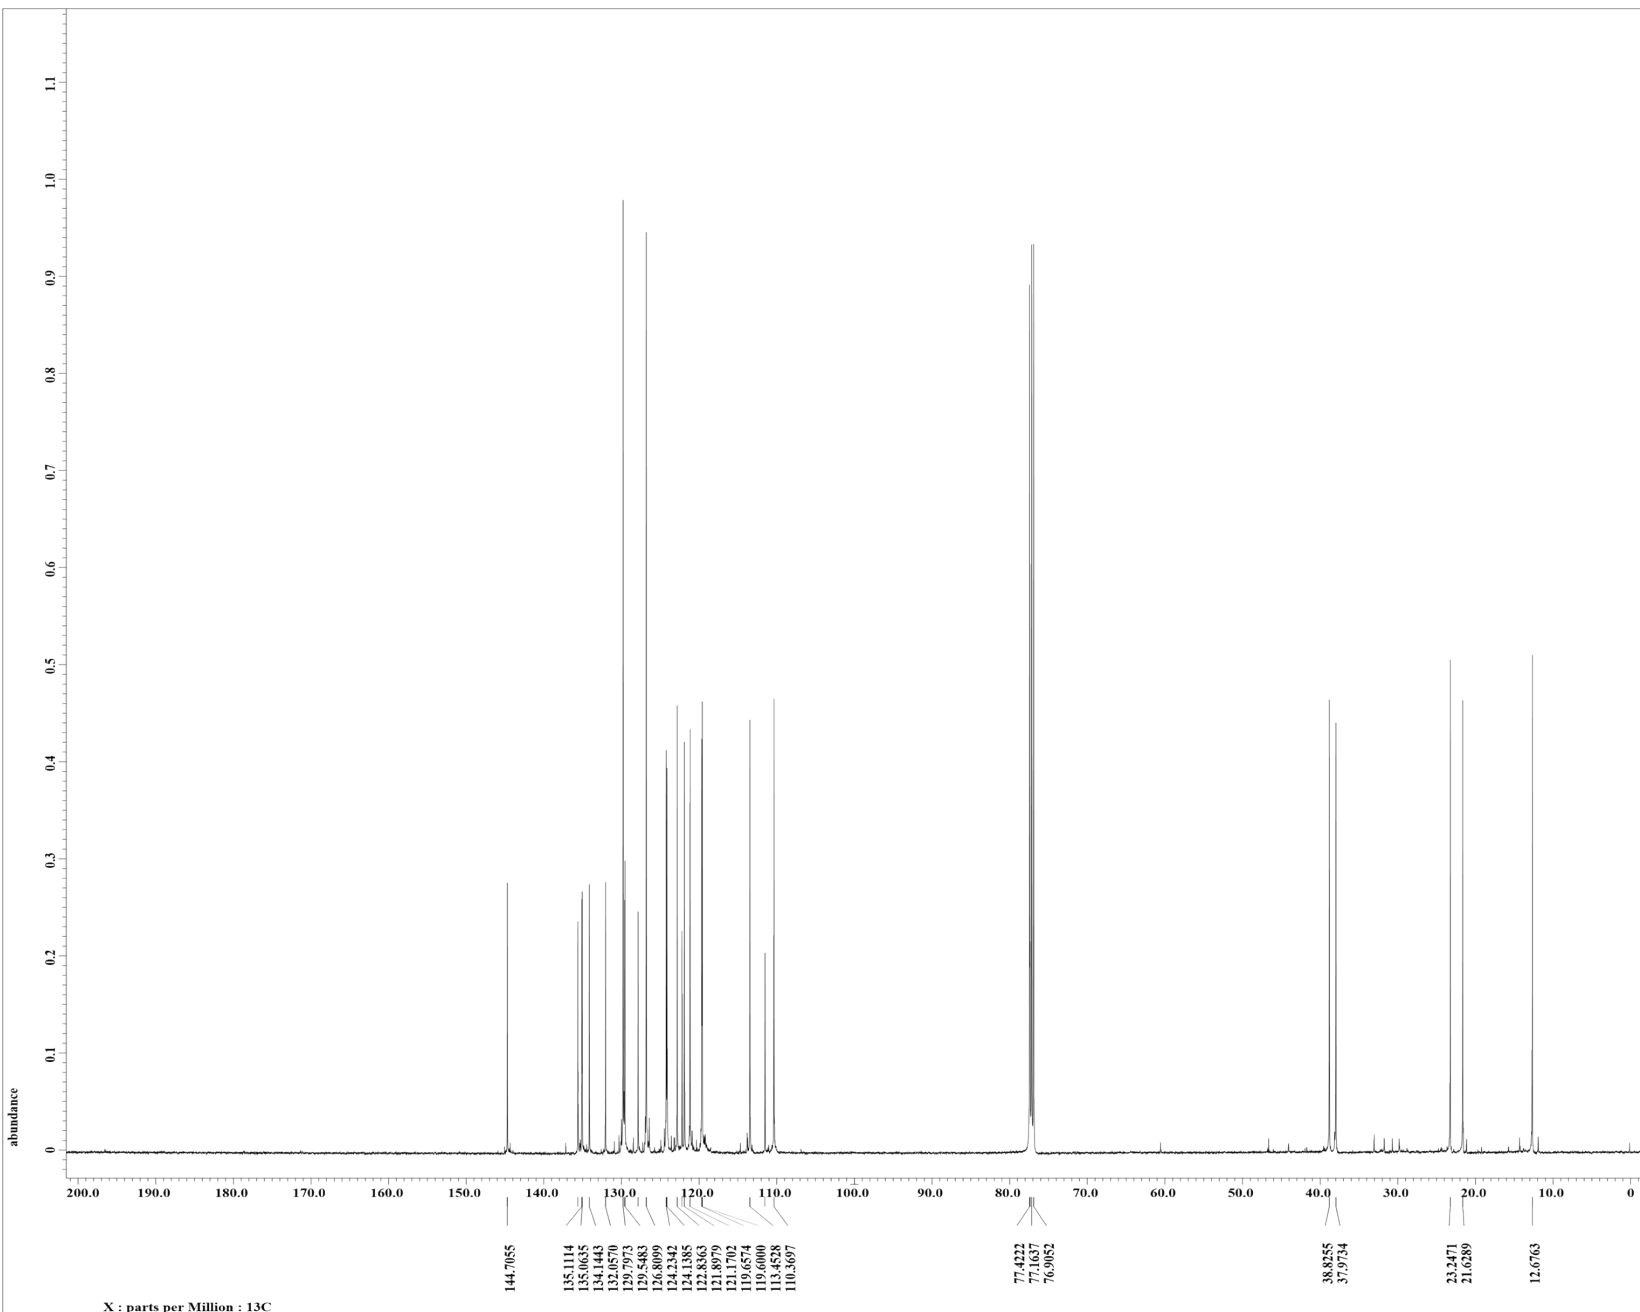



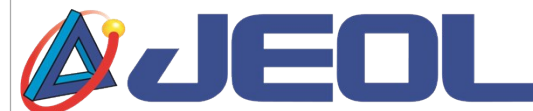

Filename = NTsindole-indole-cycl  
 Author = delta  
 Experiment = single pulse.ex2  
 Sample\_id = S8517133  
 Solvent = CHLOROFORM-D  
 Creation\_time = 13-JUN-2020 13:45:00  
 Revision\_time = 13-JUN-2020 14:26:54  
 Current\_time = 13-JUN-2020 14:27:31

Content = single pulse  
 Data\_format = 1D COMPLEX  
 Dim\_size = 13107  
 Dim\_title = 1H  
 Dim\_units = [ppm]  
 Dimensions = X  
 Site = ECA 500  
 Spectrometer = DELTA2\_NMR

Field\_strength = 11.62926421[T] (500[M]  
 X\_acq\_duration = 1.76422912[s]  
 X\_domain = 1H  
 X\_freq = 495.13191398[MHz]  
 X\_offset = 5[ppm]  
 X\_points = 16384  
 X\_prescans = 1  
 X\_resolution = 0.5668198[Hz]  
 X\_sweep = 9.28677563[kHz]  
 Irr\_domain = 1H  
 Irr\_freq = 495.13191398[MHz]  
 Irr\_offset = 5[ppm]  
 Tri\_domain = 1H  
 Tri\_freq = 495.13191398[MHz]  
 Tri\_offset = 5[ppm]  
 Clipped = FALSE  
 Mod\_return = 1  
 Scans = 8  
 Total\_scans = 8

X\_90\_width = 11.3[us]  
 X\_acq\_time = 1.76422912[s]  
 X\_angle = 45[deg]  
 X\_atn = 3.3[dB]  
 X\_pulse = 5.65[us]  
 Irr\_mode = Off  
 Tri\_mode = Off  
 Dante\_presat = FALSE  
 Initial\_wait = 1[s]  
 Recvr\_gain = 50  
 Relaxation\_delay = 5[s]  
 Repetition\_time = 6.76422912[s]  
 Temp\_get = 24.3[dc]

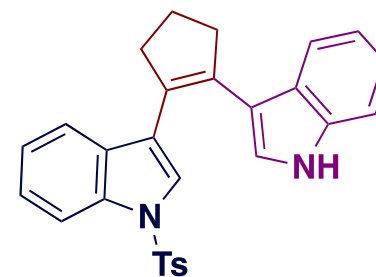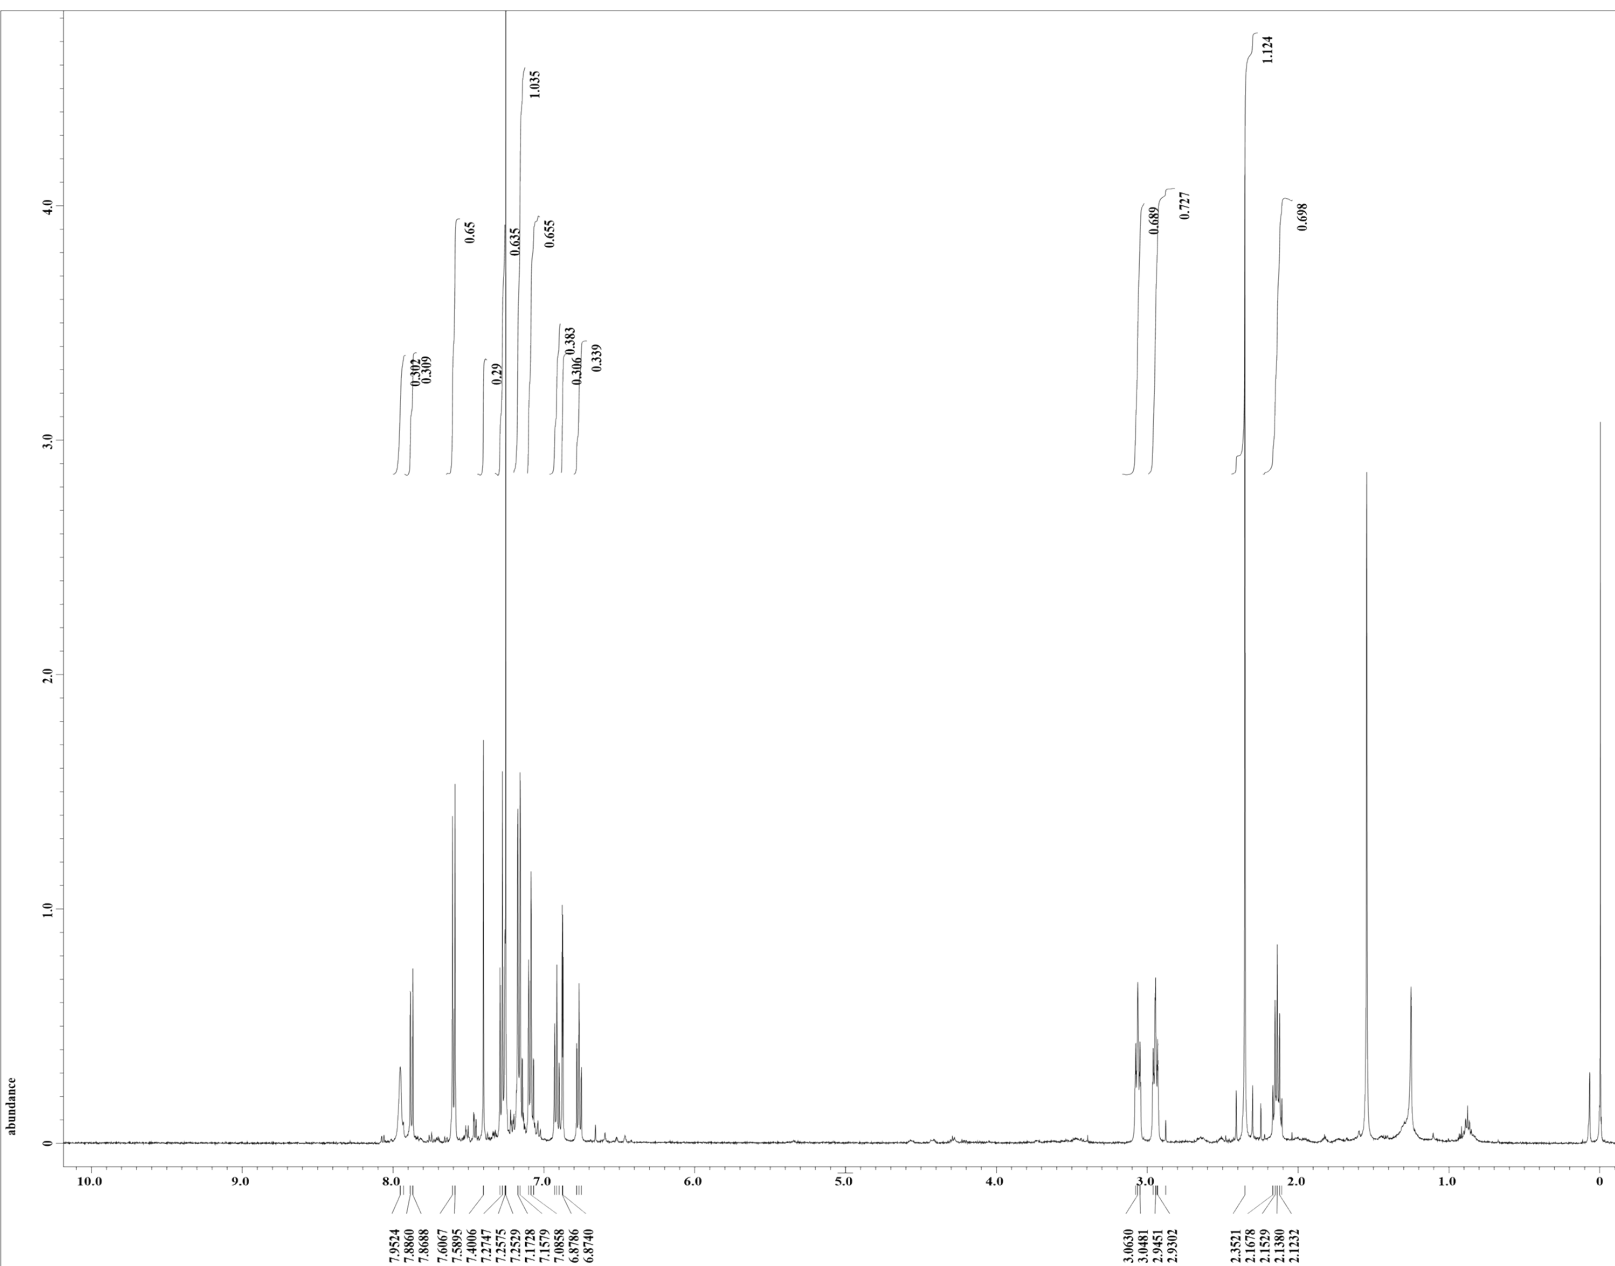

X : parts per Million : 1H

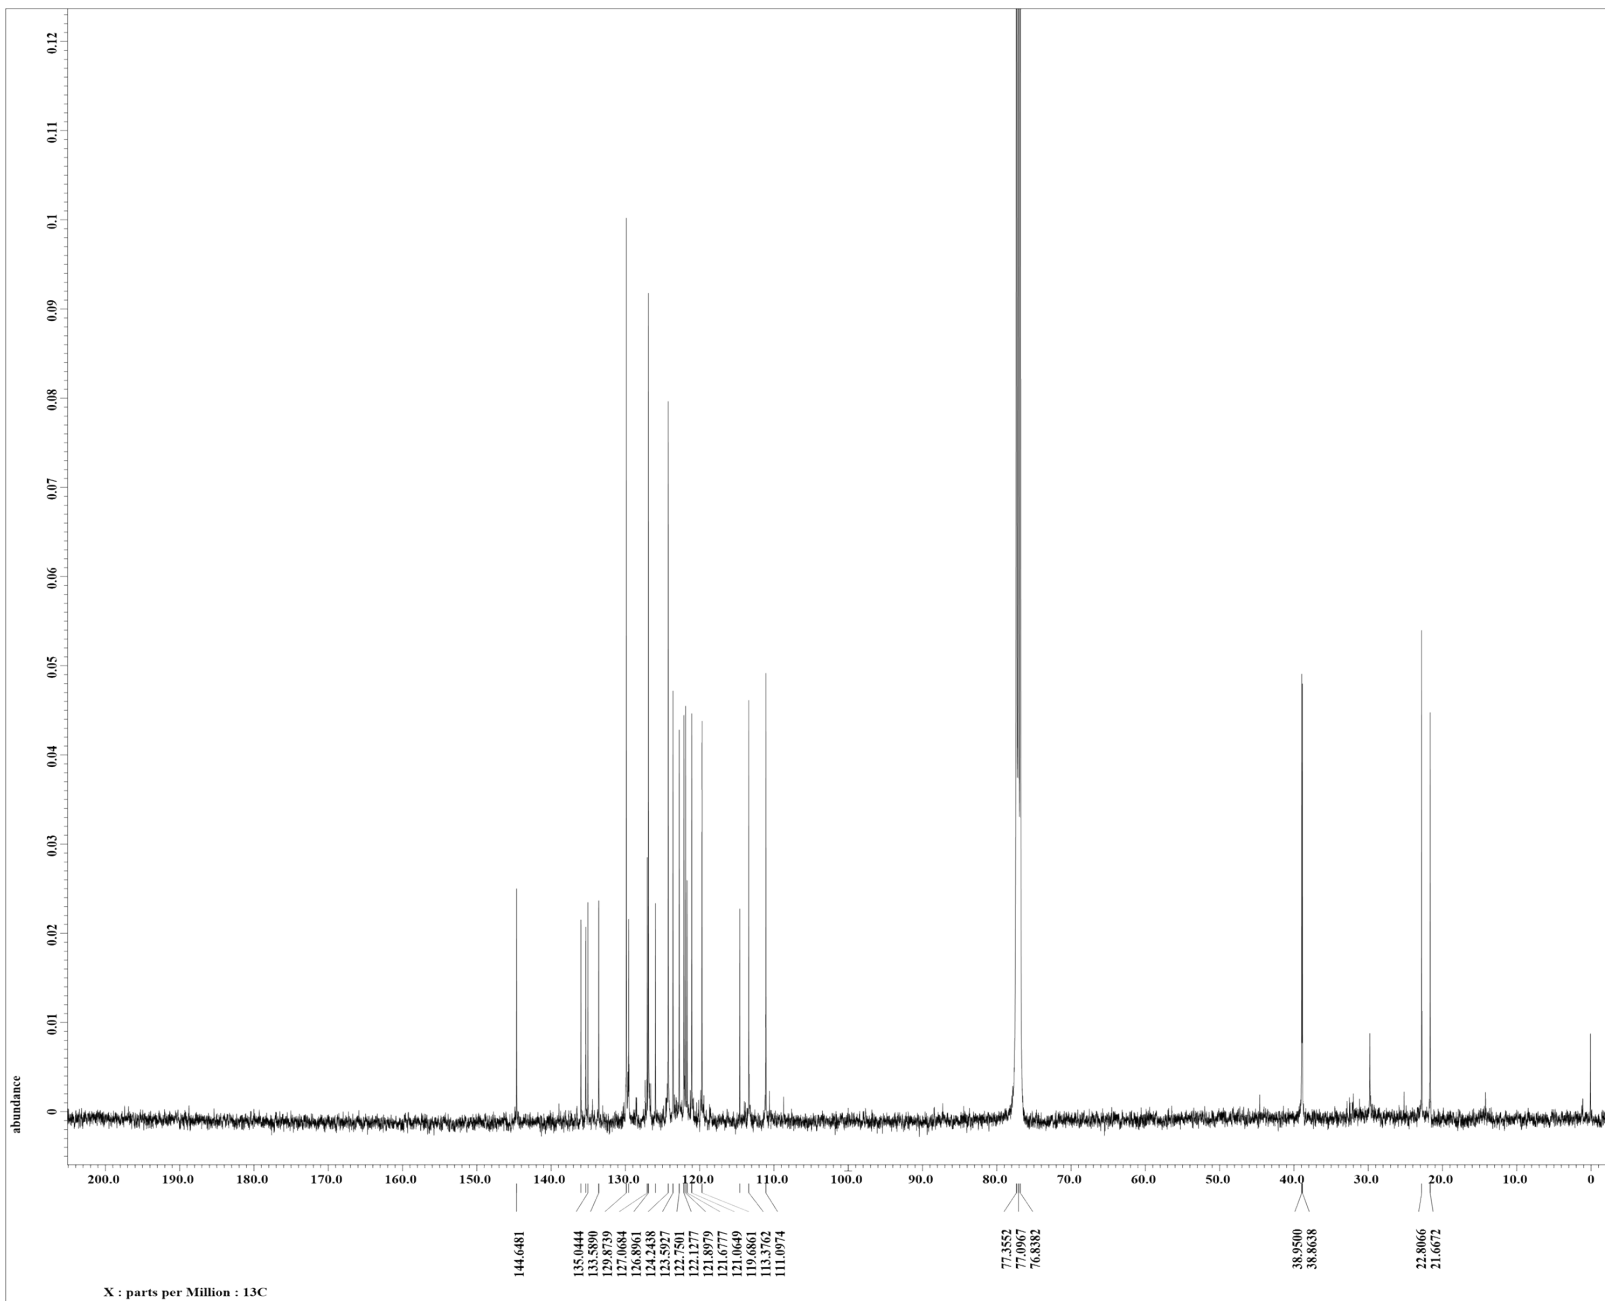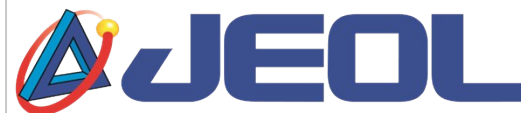

Filename = NTsindole-indole-cycl  
Author = delta  
Experiment = single pulse\_dec  
Sample\_id = S#518513  
Solvent = CHLOROFORM-D  
Creation\_time = 15-JUN-2020 07:18:27  
Revision\_time = 15-JUN-2020 07:57:42  
Current\_time = 15-JUN-2020 07:58:33

Content = single pulse decouple  
Data\_format = 1D COMPLEX  
Dim\_size = 26214  
Dim\_title = 13C  
Dim\_units = [ppm]  
Dimensions = 1  
Site = ECA 500  
Spectrometer = DELTA2\_NMR

Field\_strength = 11.62926421 [T] (500 [M]  
X\_acq\_duration = 0.8388608 [s]  
X\_domain = 13C  
X\_freq = 124.5010059 [MHz]  
X\_offset = 100 [ppm]  
X\_points = 32768  
X\_prescans = 4  
X\_resolution = 1.1920929 [Hz]  
X\_sweep = 39.0625 [kHz]  
IFR\_domain = 1H  
IFR\_freq = 495.13191398 [MHz]  
IFR\_offset = 5 [ppm]  
Clipped = FALSE  
Mod\_return = 1  
Scans = 52657  
Total\_scans = 52657

X\_90\_width = 10.1 [us]  
X\_acq\_time = 0.8388608 [s]  
X\_angle = 30 [deg]  
X\_atn = 9.5 [dB]  
X\_pulse = 3.36666667 [us]  
IFR\_atn\_dec = 21.51 [dB]  
IFR\_atn\_noe = 21.51 [dB]  
IFR\_noise = WAITZ  
Decoupling = TRUE  
Initial\_wait = 1 [s]  
Noe = TRUE  
Noe\_time = 2 [s]  
RecVr\_gain = 60  
Relaxation\_delay = 2 [s]  
Repetition\_time = 2.8388608 [s]  
Temp\_get = 25.1 [dC]

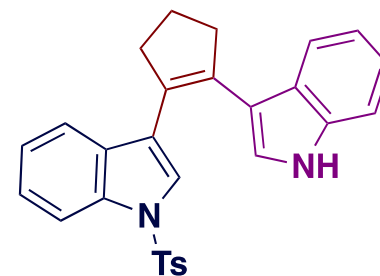

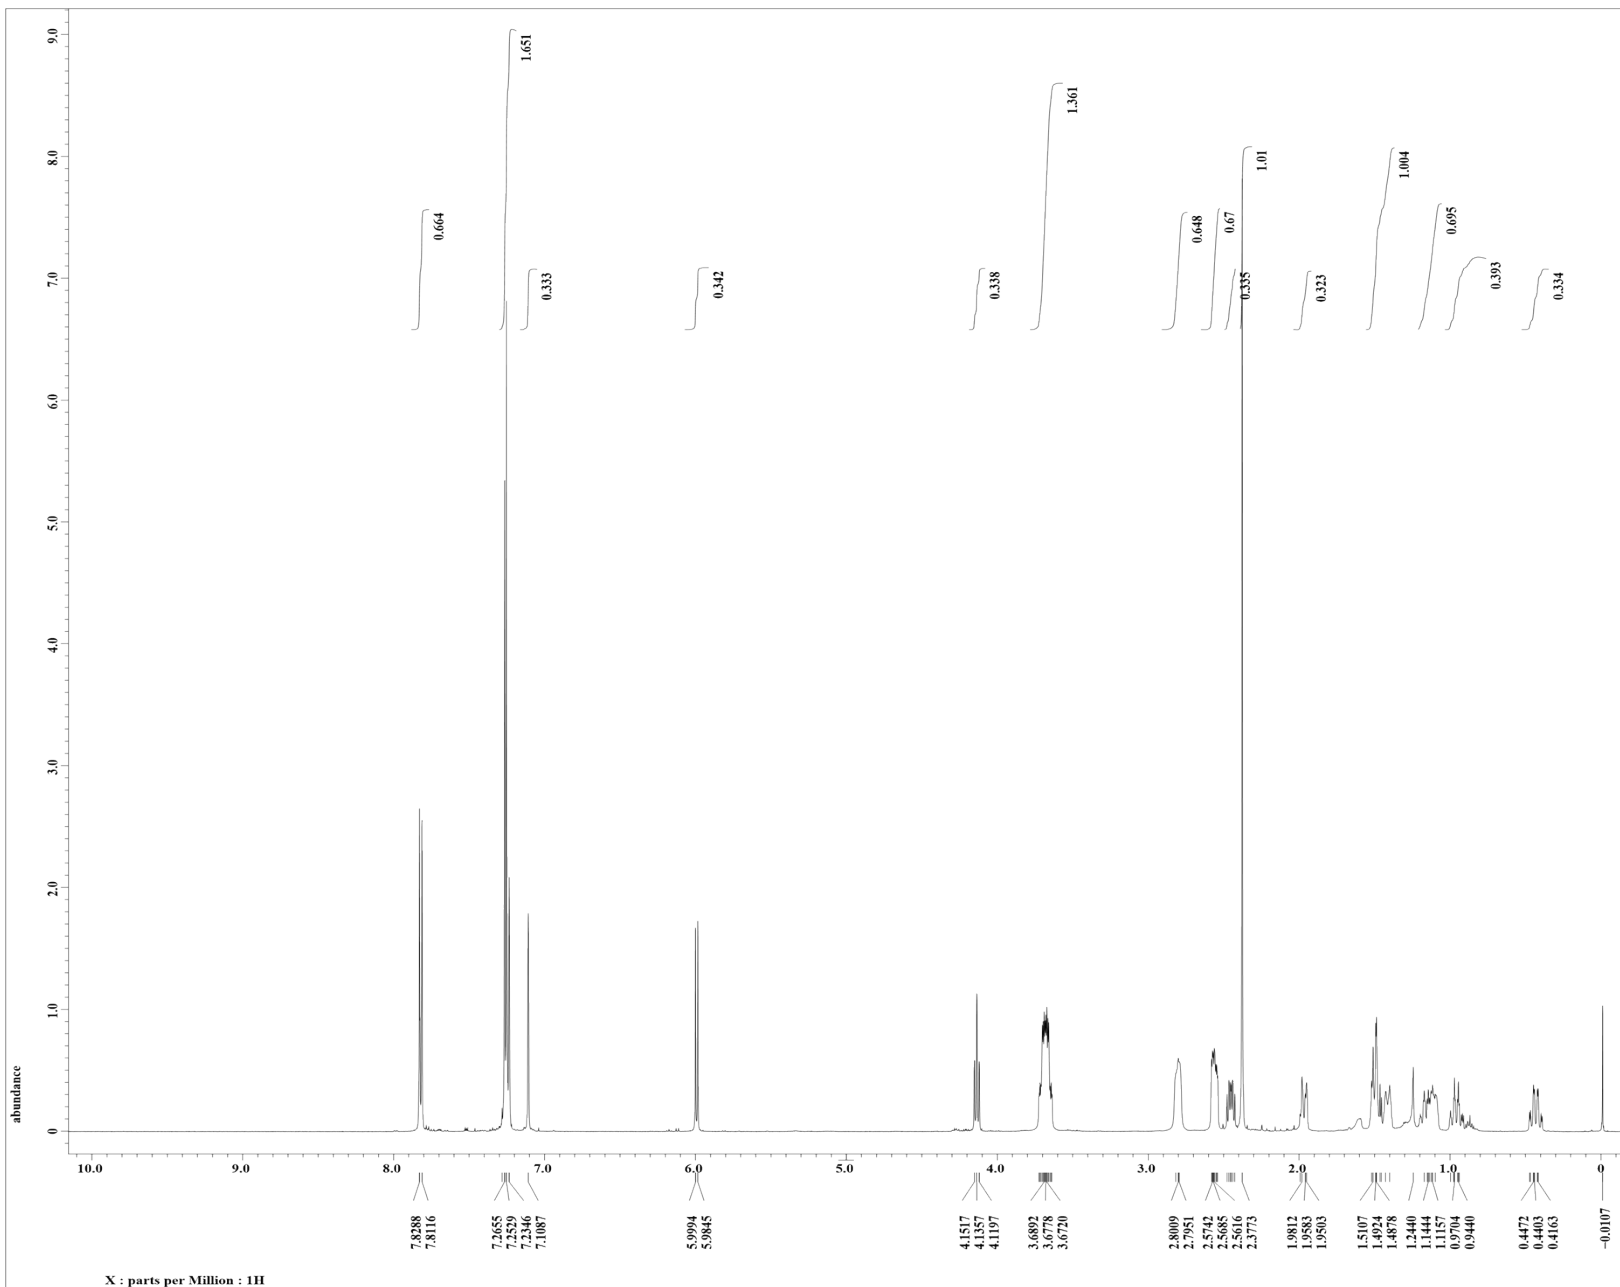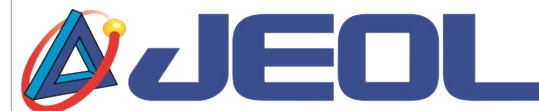

Filename = TA200211-5Br-TsOH-pol  
 Author = delta  
 Experiment = single pulse.ex2  
 Sample\_id = S#413435  
 Solvent = CHLOROFORM-D  
 Creation\_time = 11-FEB-2020 10:34:07  
 Revision\_time = 11-FEB-2020 12:40:05  
 Current\_time = 11-FEB-2020 12:40:25

Content = single pulse  
 Data\_format = 1D COMPLEX  
 Dim\_size = 13107  
 Dim\_title = 1H  
 Dim\_units = [ppm]  
 Dimensions = X  
 Site = ECA 500  
 Spectrometer = DELTA2\_NMR

Field\_strength = 11.62926421[T] (500[M]  
 X\_acq\_duration = 1.76422912[s]  
 X\_domain = 1H  
 X\_freq = 495.13191398[MHz]  
 X\_offset = 5[ppm]  
 X\_points = 16384  
 X\_prescans = 1  
 X\_resolution = 0.5668198[Hz]  
 X\_sweep = 9.28677563[kHz]  
 Irr\_domain = 1H  
 Irr\_freq = 495.13191398[MHz]  
 Irr\_offset = 5[ppm]  
 Tri\_domain = 1H  
 Tri\_freq = 495.13191398[MHz]  
 Tri\_offset = 5[ppm]  
 Clipped = FALSE  
 Mod\_return = 1  
 Scans = 8  
 Total\_scans = 8

X\_90\_width = 11.3[us]  
 X\_acq\_time = 1.76422912[s]  
 X\_angle = 45[deg]  
 X\_atn = 3.3[dB]  
 X\_pulse = 5.65[us]  
 Irr\_mode = Off  
 Tri\_mode = Off  
 Dante\_presat = FALSE  
 Initial\_wait = 1[s]  
 Recvr\_gain = 40  
 Relaxation\_delay = 5[s]  
 Repetition\_time = 6.76422912[s]  
 Temp\_get = 23[dc]

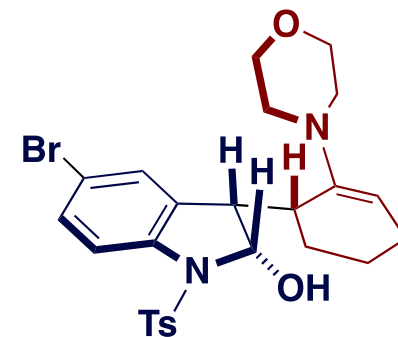

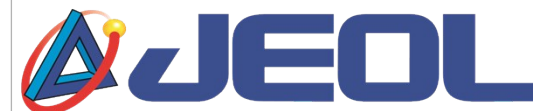

Filename = TA200211-5Br-TsOH-pol  
 Author = delta  
 Experiment = single pulse\_dec  
 Sample id = SH461522  
 Solvent = CHLOROFORM-D  
 Creation time = 11-FEB-2020 14:10:54  
 Revision time = 11-FEB-2020 15:08:11  
 Current time = 11-FEB-2020 15:08:55

Content = single pulse decouple  
 Data format = 1D COMPLEX  
 Dim Size = 26214  
 Dim title = 13C  
 Dim units = [ppm]  
 Dimensions = X  
 Site = ECA 500  
 Spectrometer = DELTA2\_NMR

Field strength = 11.62926421[T] (500[M]  
 X\_acq\_duration = 0.8388608[s]  
 X\_domain = 13C  
 X\_freq = 124.5010059[MHz]  
 X\_offset = 100[ppm]  
 X\_points = 32768  
 X\_prescans = 4  
 X\_resolution = 1.1920929[Hz]  
 X\_sweep = 39.0625[kHz]  
 Irr\_domain = 1H  
 Irr\_freq = 499.13191398[MHz]  
 Irr\_offset = 5[ppm]  
 Clipped = FALSE  
 Mod return = 1  
 Scans = 2901  
 Total\_scans = 2901

X\_90\_width = 10.1[us]  
 X\_acq\_time = 0.8388608[s]  
 X\_angle = 30[deg]  
 X\_atn = 9.5[dB]  
 X\_pulse = 3.36666667[us]  
 Irr\_atn\_dec = 21.51[dB]  
 Irr\_atn\_noe = 21.51[dB]  
 Irr\_noise = WALTZ  
 Decoupling = TRUE  
 Initial\_wait = 1[s]  
 Noe = TRUE  
 Noe\_time = 2[s]  
 Recvr\_gain = 60  
 Relaxation\_delay = 2[s]  
 Repetition\_time = 2.8388608[s]  
 Temp\_get = 23.7[dC]

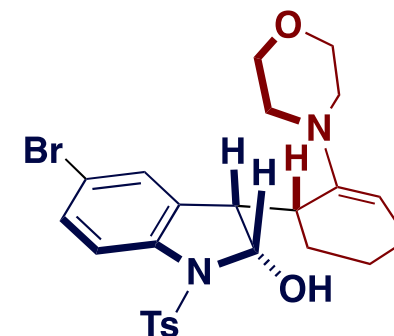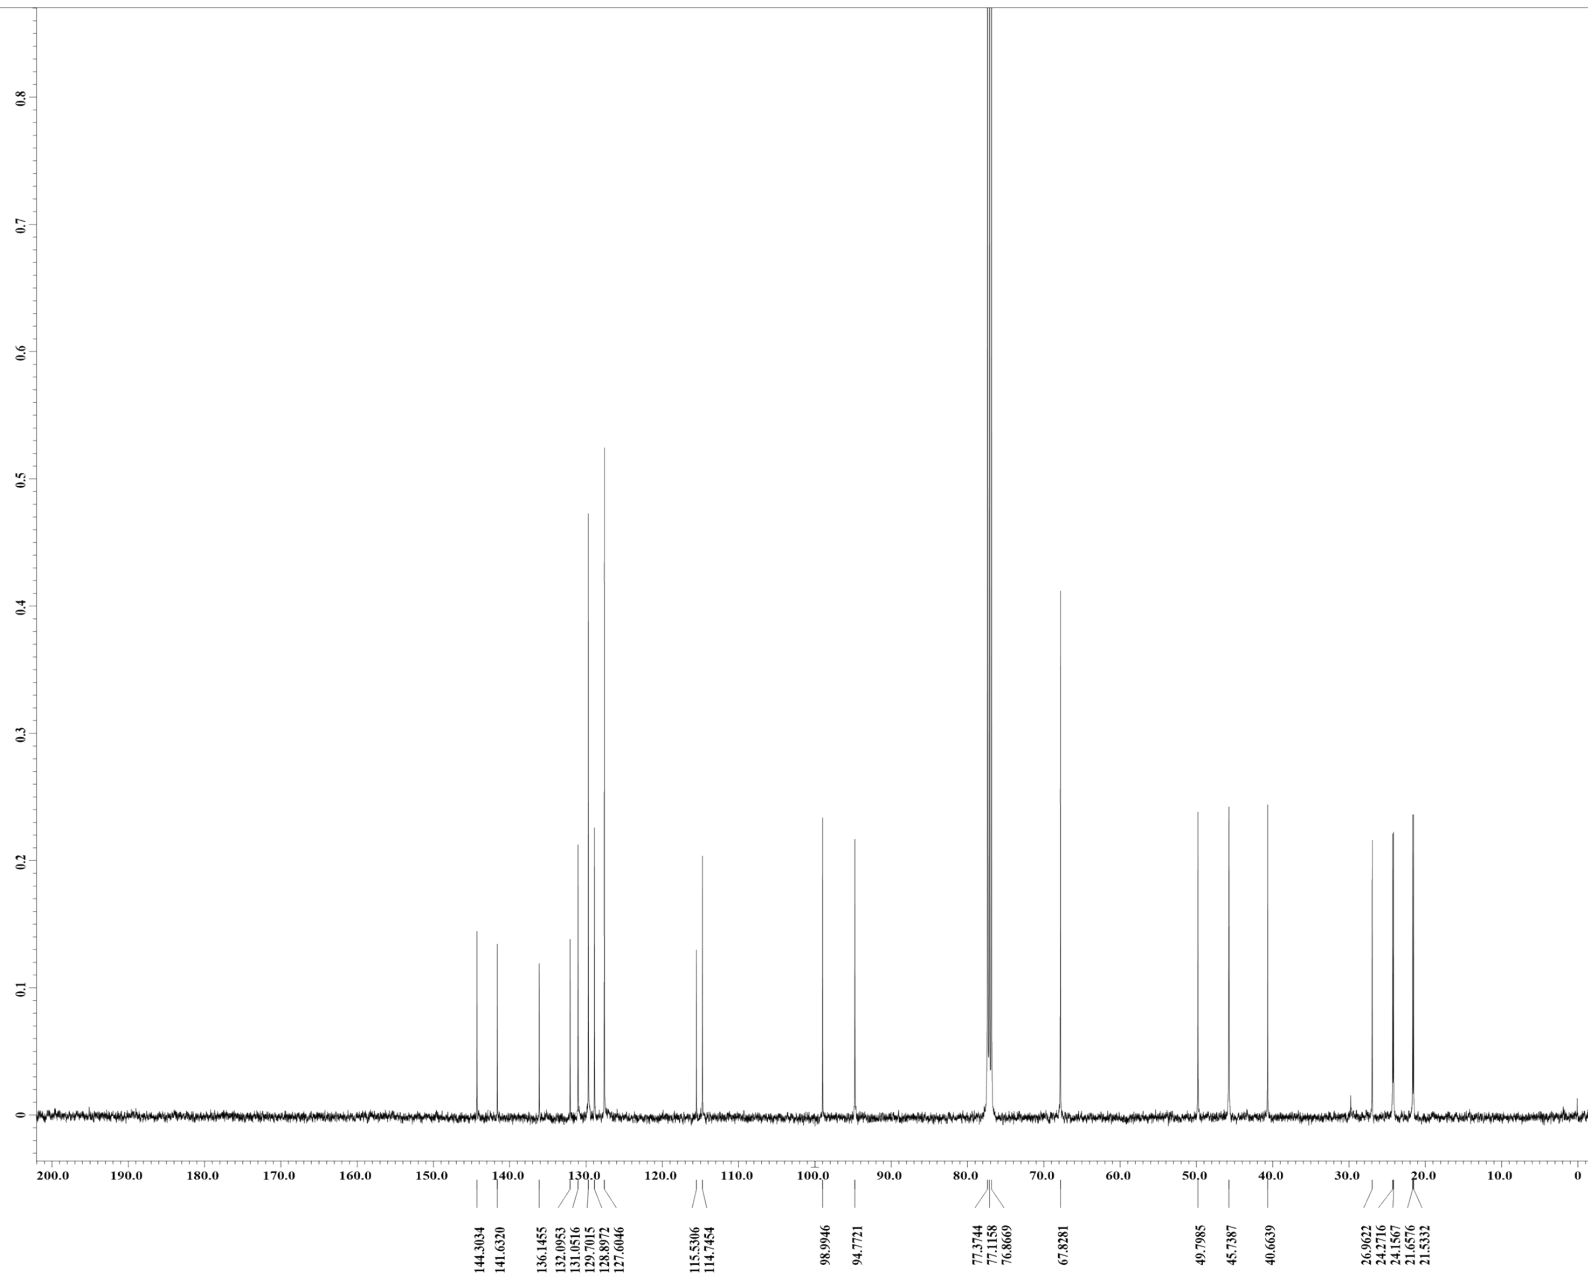

X : parts per Million : 13C

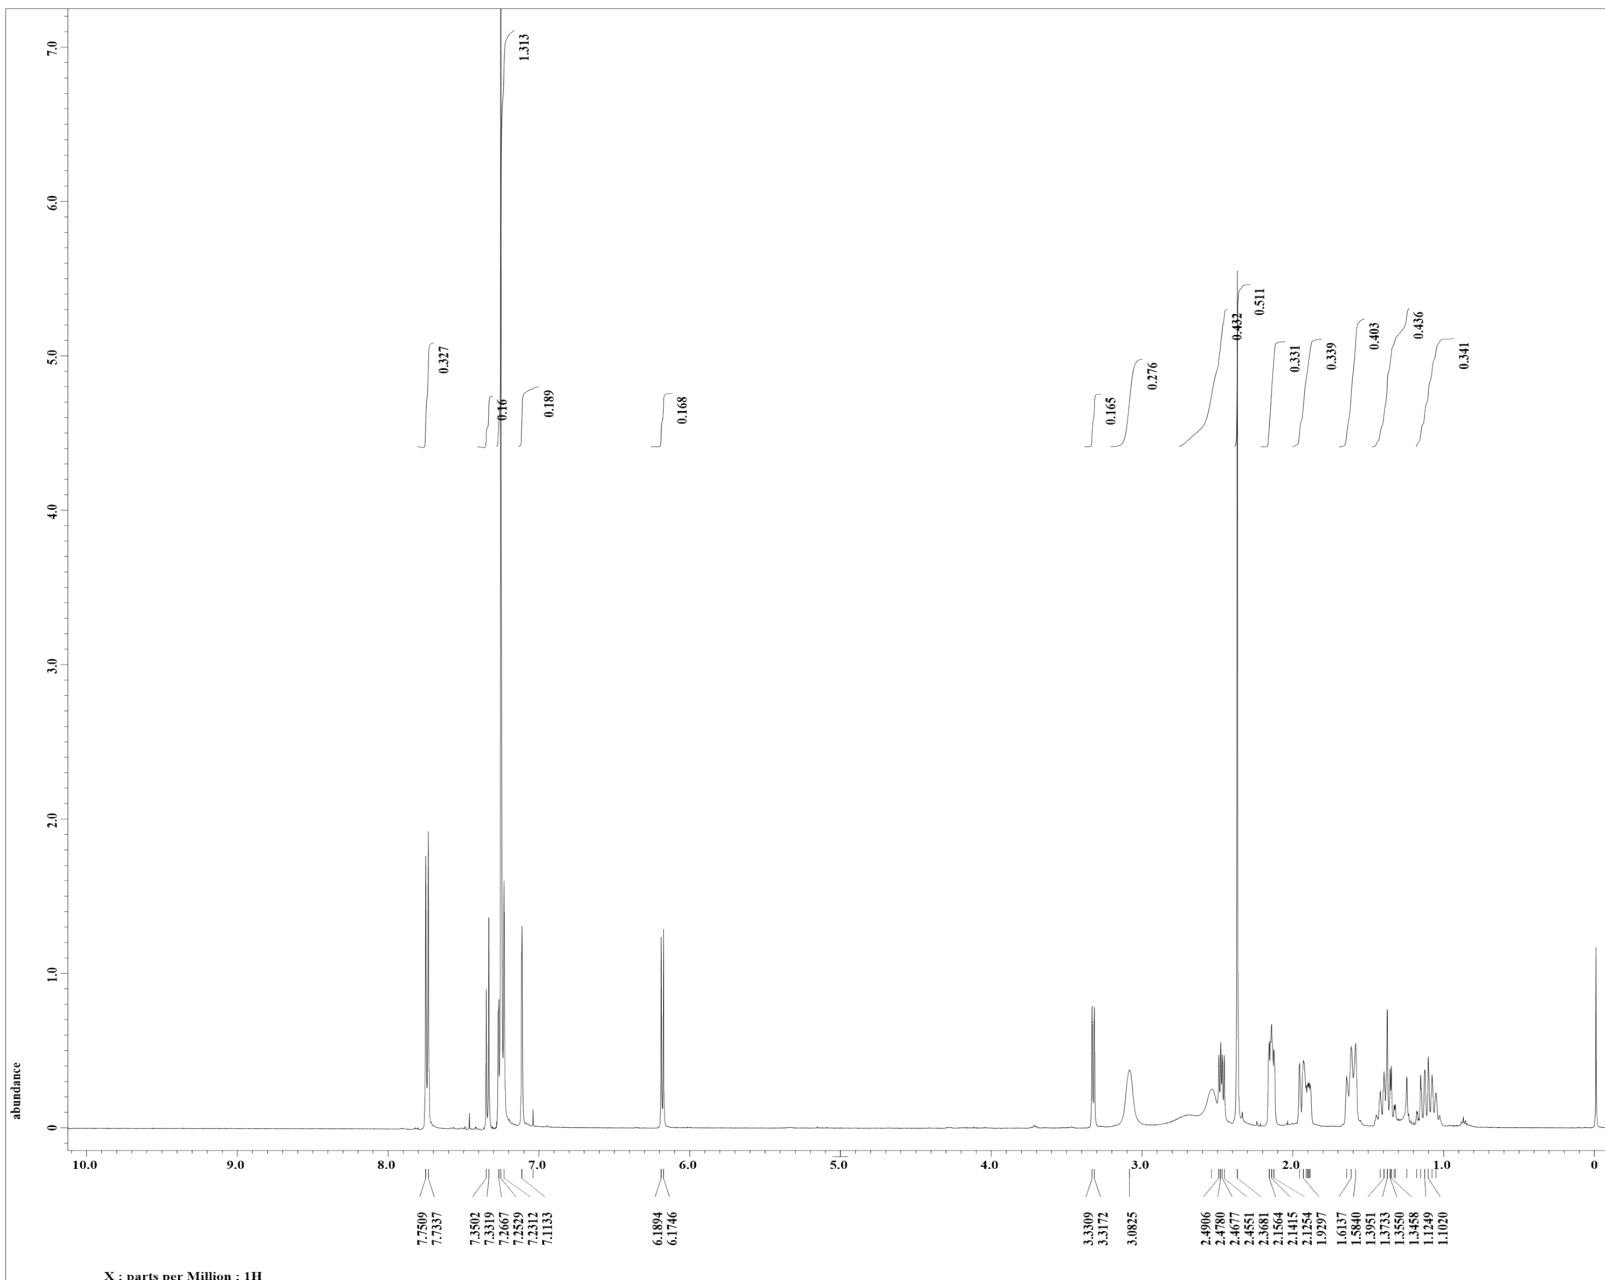

X : parts per Million : 1H

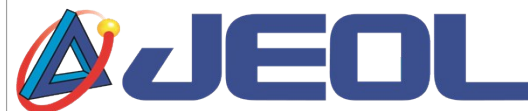

Filename = TA200210-5Br-TsOH-6.j  
 Author = delta  
 Experiment = single pulse.ex2  
 Sample\_id = S#623049  
 Solvent = CHLOROFORM-D  
 Creation\_time = 10-FEB-2020 16:23:33  
 Revision\_time = 10-FEB-2020 17:27:55  
 Current\_Time = 10-FEB-2020 17:28:41

Content = single pulse  
 Data\_format = 1D COMPLEX  
 Dim\_size = 13107  
 Dim\_title = 1H  
 Dim\_units = [ppm]  
 Dimensions = X  
 Site = ECA 500  
 Spectrometer = DELTA2\_NMR

Field\_strength = 11.62926421[T] (500[M]  
 X\_acq\_duration = 1.76422912[s]  
 X\_domain = 1H  
 X\_freq = 495.13191398[MHz]  
 X\_offset = 5[ppm]  
 X\_points = 16384  
 X\_prescans = 1  
 X\_resolution = 0.5668198[Hz]  
 X\_sweep = 9.28677563[kHz]  
 Irr\_domain = 1H  
 Irr\_freq = 495.13191398[MHz]  
 Irr\_offset = 5[ppm]  
 Tri\_domain = 1H  
 Tri\_freq = 495.13191398[MHz]  
 Tri\_offset = 5[ppm]  
 Clipped = FALSE  
 Mod\_return = 1  
 Scans = 8  
 Total\_scans = 8

X\_90\_width = 11.3[us]  
 X\_acq\_time = 1.76422912[s]  
 X\_angle = 45[deg]  
 X\_atn = 3.3[dB]  
 X\_pulse = 5.65[us]  
 Irr\_mode = Off  
 Tri\_mode = Off  
 Dante\_presat = FALSE  
 Initial\_wait = 1[s]  
 Recvr\_gain = 42  
 Relaxation\_delay = 5[s]  
 Repetition\_time = 6.76422912[s]  
 Temp\_get = 22.9[dc]

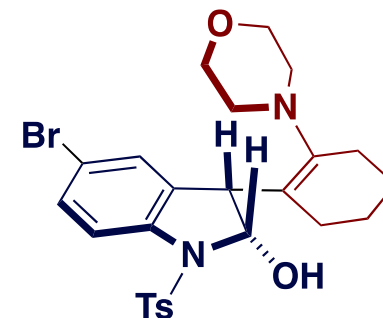

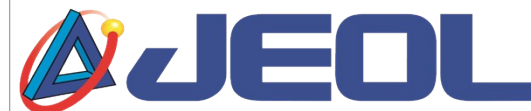

Filename = TA200210-5Br-TsOH-10.  
 Author = delta  
 Experiment = single\_pulse\_dec  
 Sample\_id = S#753694  
 Solvent = CHLOROFORM-D  
 Creation\_time = 11-FEB-2020 10:22:10  
 Revision\_time = 11-FEB-2020 11:19:24  
 Current\_time = 11-FEB-2020 11:20:55  
 Content = single pulse decouple  
 Data\_format = 1D COMPLEX  
 Dim\_size = 26214  
 Dim\_title = 13C  
 Dim\_units = [ppm]  
 Dimensions = X  
 Site = ECA 500  
 Spectrometer = DELTA2\_NMR

Field\_strength = 11.62926421[T] (500[M]  
 X\_acq\_duration = 0.8388608[s]  
 X\_domain = 13C  
 X\_freq = 124.5010059[MHz]  
 X\_offset = 100[ppm]  
 X\_points = 32768  
 X\_prescans = 4  
 X\_resolution = 1.1920929[Hz]  
 X\_sweep = 39.0625[kHz]  
 Irr\_domain = 1H  
 Irr\_freq = 495.13191398[MHz]  
 Irr\_offset = 5[ppm]  
 Clipped = FALSE  
 Mod\_return = 1  
 Scans = 18212  
 Total\_scans = 18212

X\_90\_width = 10.1[us]  
 X\_acq\_time = 0.8388608[s]  
 X\_angle = 30[deg]  
 X\_atn = 9.5[db]  
 X\_pulse = 3.36666667[us]  
 Irr\_atn\_dec = 21.51[db]  
 Irr\_atn\_noe = 21.51[db]  
 Irr\_noise = WALTZ  
 Decoupling = TRUE  
 Initial\_wait = 1[s]  
 Noe = TRUE  
 Noe\_time = 2[s]  
 Recvr\_gain = 60  
 Relaxation\_delay = 2[s]  
 Repetition\_time = 2.8388608[s]  
 Temp\_get = 23.5[dc]

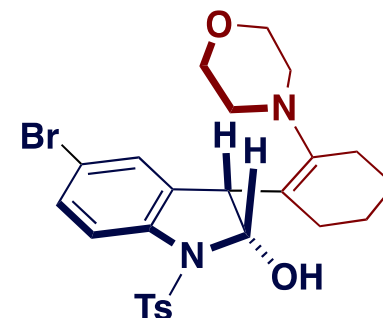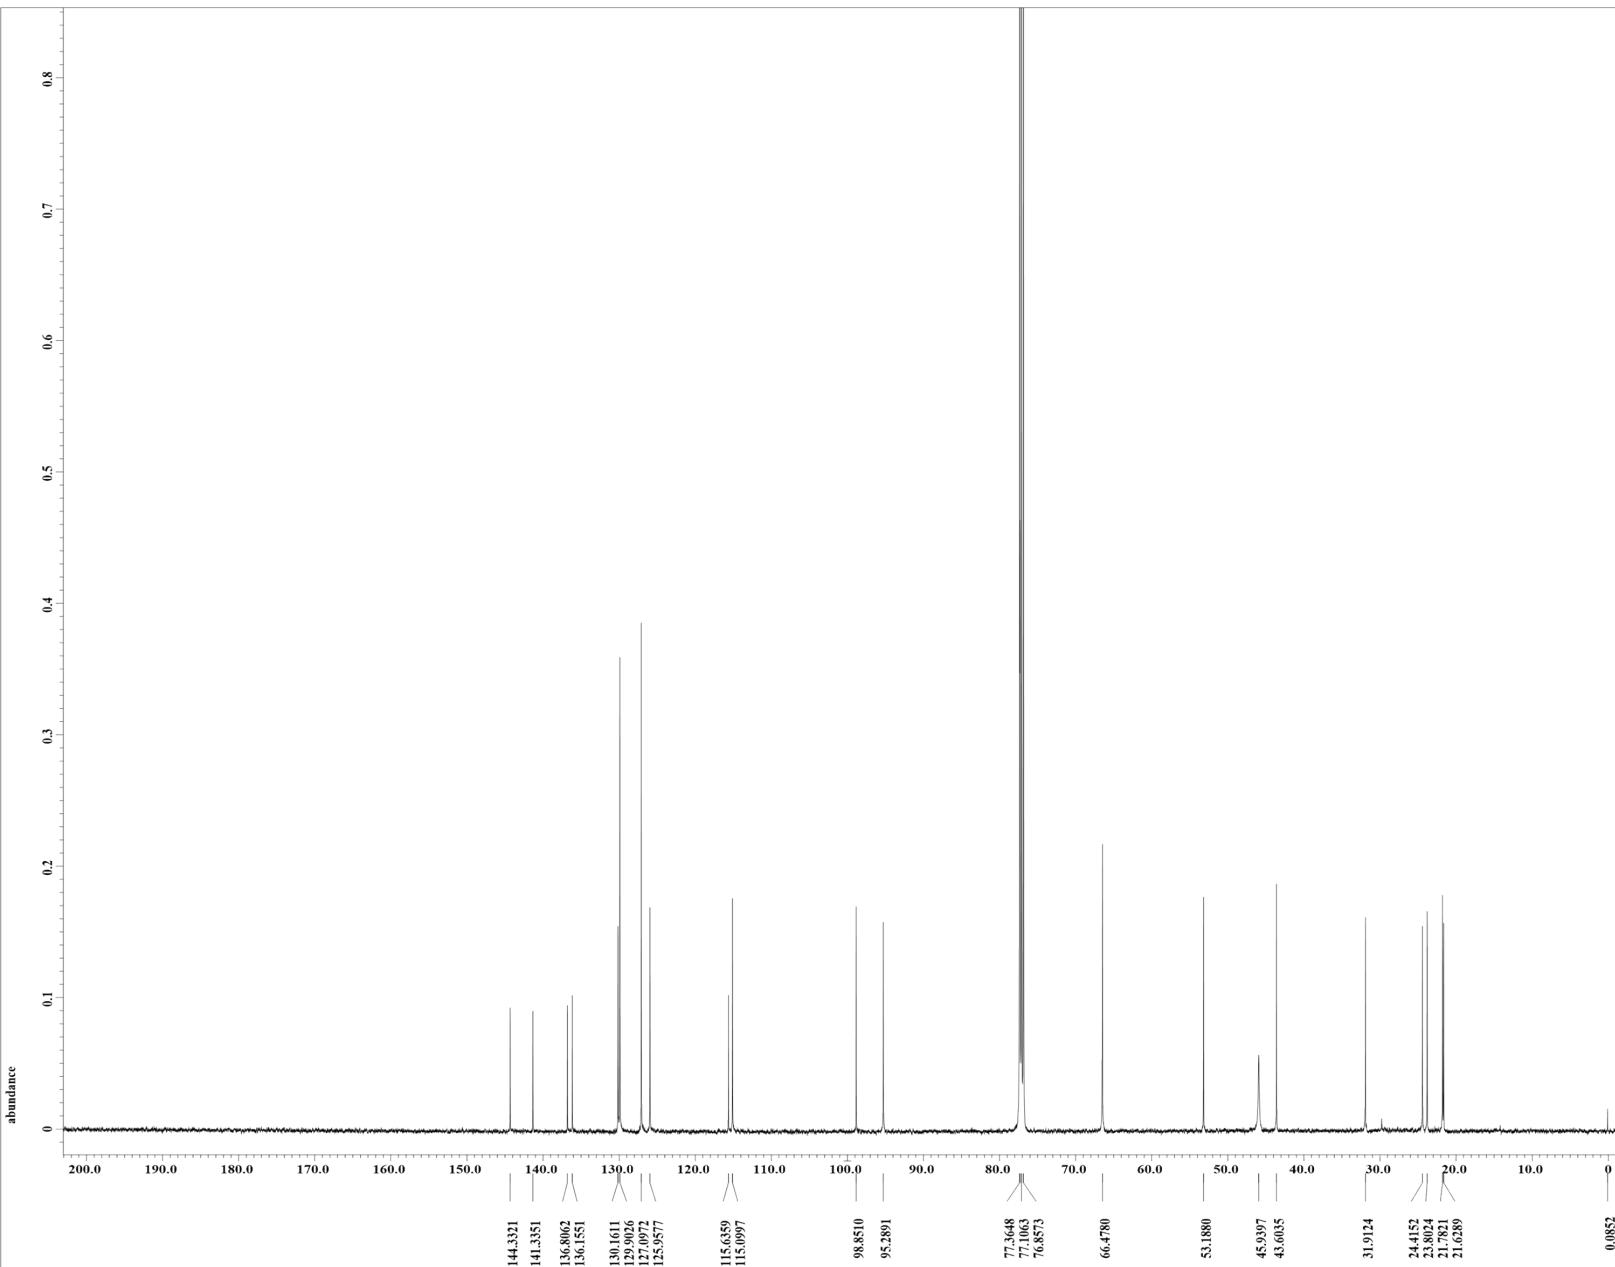

X : parts per Million : 13C
